# Supplementary material for: Vins bio: les raisins de la regueur
Source: MDPI journal article supplement (doi:10.3390/plants13040492), 2006-01-01
Supplement: s1 [file s1]

**Figure S1: Expression of genes related to trichome development in *GhZFP8* overexpressor *Arabidopsis***

(A-I) Expression of *GL1* (A), *TTG1* (B), *GL3* (C), *EGL3*(D), *TTG1*(E), *WER1*(F), *GA1*(G), *GIS*(H), *GIS3*(I) in *GhZFP8* overexpressor *Arabidopsis*. RNA was isolated from leaves of 21-day-old plants, qRT-PCR was performed to check the expression of genes involved in trichome development. The expression of *ACTIN2* was used as a reference gene. Data represent the mean $\pm$ SD of three replicates.

**Figure S2: Transcription level of GhZFP8 in RNAi plants.**
