# Supplementary material for: Zinc Finger Protein8 (GhZFP8) Regulates the Initiation of Trichomes in Arabidopsis and the Development of Fiber in Cotton
Source: Plants (Basel). 2024 Feb 8;13(4):492. doi: 10.3390/plants13040492 (PMC10892670; doi:10.3390/plants13040492)
Supplement: Supplementary file 1 [file plants-13-00492-s001.zip]

Archive with 9 entries (9 files):
- Figure S1.tif
- Figure S2.tif
- Supplementary Figure legends.pdf
- Table S1 Primers used in this study.xls
- Table S2  Fiber Parameter of four cultivars used in this study.xls
- Table S3  Analysis of GhZFP8 binding region in target genes.html
- Table S4 Annotation of binding peak  in GhZFP8 target genes.xls
- Table S5 GO enrichment  analysis of GhZFP8 target genes.xls
- Table S6 KEGG enrichment  analysis of GhZFP8 target genes.xls
