# Supplementary material for: Zinc Finger Protein8 (GhZFP8) Regulates the Initiation of Trichomes in Arabidopsis and the Development of Fiber in Cotton
Source: Plants (Basel). 2024 Feb 8;13(4):492. doi: 10.3390/plants13040492 (PMC10892670; doi:10.3390/plants13040492)
Supplement: Supplementary file 1 [file plants-13-00492-s001.zip › Table S1 Primers used in this study.xls]

## Sheet: Sheet1
Primers used in this study
Forward primer	Reverse primer	Purpose
5’-GGATCCATGGAGAAGAACGAAAGGGAGA-3’	5’-ACTAGTCAGATGTAGATCCAAACTCAC-3’	Subcellular localization
5’-CTTCATGGAACTCTAGCT-3’	5’-GGCAAGGGATGCGAGGATG-3’	qPCR of GhZFP8
5’-CAGATCTTCGTCAAAACCCT-3’	5’-GACTCCTTCTGGATGTTGTA-3’	qPCR of UBI
5’-ATGGCAACCGTCGATGTC-3’	5’-TTACCTTAACAAAATAAAAC-3’	qPCR of ACTIN2
5’-CAATGGAACCGCATCGTCAG-3’	5’-TGATGAACAATGACGGTGGA-3’	qPCR of GL1
5’-CTCAGTGGCAATCCAGACAG-3’	5’-ACTCTACTCCATCAGGTATG-3’	qPCR of GL2
5’-CGCAGGAGAAAGAACATCAG-3’	5’-CGAGGATTGAACCGAATGAG-3’	qPCR of GL3
5’-TATTCGTTCGCCGACTATGCC-3’	5’-ATTGGGTCCAGCAACAGTAGG-3’	qPCR of TTG1
5’-TCGGTTATGCTGGTCTAACG-3’	5’-CCATGCAACCCTTTGAAGTG-3’	qPCR of EGL3
5’-TGAAGAACAATGACCTAACTAACT-3’	5’-CTCTCCGACAATGCTAACTC-3’	qPCR of GA1
5’-TTCATGAACGTCGAATCCTTCTC-3’	5’-ACGAATGGGTTTAGGGTTCTTATCT-3’	qPCR of GIS
5’-GAGGAGGAGGAGGAGGAGAA-3’	5’-CTGCGTTTCGTGTAGCTTGA-3’	qPCR of GIS3
5’-TGTCAAAGCTCATGGCAAAG-3’	5’-ATCCTCTTCTTGCTCGGTGA-3’	qPCR of WRE1
5’-ATGAATACGCAGCGTAAGTC-3’	5’-TCAACGTAATTGAGATCTTCG-3’	qPCR of ETC1
5’-ATGGATAACACAAACCGTC-3’	5’-TCATTTGTGGGAGAAATAGTC-3’	qPCR of TCL1
5’-TCCCCTCTTCTTCTTCTTGTTCGCTC-3’	5’-CTTACGACGGCGACGACGGTCAGTGT-3’	qPCR of TRY1
5′-TTTGTCGTAGTTGCCCTTTTGG-3′	5′-TTGGTGAGGCGGTGG GT-3′	qPCR of AGP11
5'-CTGCTCTCATCTCTT CCTTTAGTG-3'	5' -ATT GAG CCA CAT TAC TGC TCT TCC-3'	qPCR of AGP19
5' -CACCTGCATCTGCACCATCAGAAA- 3'	5'-TAGCCACAAACCCGAGAACAAGGA -3'	qPCR of FLA3
5′-GTGATGTTCTAAGCAGAGTTGGAG-3′	5′-TCAGAAGAAATTGCGGTGACTGCG-3′	qPCR of TBL31
5’-TACAGGAAAGATGCACATACGTCG-3’	5’-TCAAGTATAGAAAAGTTTAGCAAAGAG-3’	qPCR of TBL33
5’-CAGTGGTCTCACAACATGGAGAAGAACGAAAGGGA-3’	5’-CGATGGTCTCACAGATGATGATCCAAACTCA-3’	GhZFP8 overexpression
5'-cagtGGTCTCacaaccatccgtttgttcggcaagg-3'	5'-cgatGGTCTCacaggcttttgtgagcgttttggtg-3'	RNAi vector construction
5'-cgatGGTCTCacctgcaggtctagtttttct-3'	5'-cgatGGTCTCagcccgggctctgtaactatc-3'
5'-cagtGGTCTCagggccttttgtgagcgttttggtg-3'	5'-cagtGGTCTCatacacatccgtttgttcggcaagg-3'
