# Supplementary material for: Zinc Finger Protein8 (GhZFP8) Regulates the Initiation of Trichomes in Arabidopsis and the Development of Fiber in Cotton
Source: Plants (Basel). 2024 Feb 8;13(4):492. doi: 10.3390/plants13040492 (PMC10892670; doi:10.3390/plants13040492)
Supplement: Supplementary file 1 [file plants-13-00492-s001.zip › Table S2 Fiber Parameter of four cultivars used in this study.xls]

## Sheet: Sheet1
	Fiber lenght(mm)	Fiber strength(cN.tex-1)	Micronaire value	Fiber uniform(%)	Fiber elongation(%)	Lint percent(%)
SF	22.38	22.8	4.82	83.9	6.3	38
LF	32.2	44.6	4.19	88	7.8	43.5
