# Supplementary material for: Zinc Finger Protein8 (GhZFP8) Regulates the Initiation of Trichomes in Arabidopsis and the Development of Fiber in Cotton
Source: Plants (Basel). 2024 Feb 8;13(4):492. doi: 10.3390/plants13040492 (PMC10892670; doi:10.3390/plants13040492)
Supplement: Supplementary file 1 [file plants-13-00492-s001.zip › Table S4 Annotation of binding peak in GhZFP8 target genes.xls]

geneId	seqnames	start	end	width	peak_name	fold_enrichment	#NAME?	#NAME?	pvalue	qvalue	annotation	geneStart	geneEnd	geneLength	geneStrand	transcriptId	distanceToTSS	IPR_id	IPR_description	KEGG_orthology_ID	KEGG_orthology_description	GO_ID	GO_term	KEGG_ID	KEGG_description
Gohir.A04G029508	A04	6466954	6467154	201	GhZFPH4_DAP-vs-GhZFPH4_neg_peak_1241	7.724	15.8694	11.4748	1.35E-16	3.35E-12	Distal Intergenic	6454907	6461786	6880	1	Gohir.A04G029508.1	12047	IPR001611,IPR032675	Leucine-rich repeat|Leucine-rich repeat domain superfamily	-	-	GO:0005515	protein binding	-	-
Gohir.A05G361750	A05	100027562	100027858	297	GhZFPH4_DAP-vs-GhZFPH4_neg_peak_1915	6.30063	11.8235	7.59644	1.50E-12	2.53E-08	Distal Intergenic	100046675	100048252	1578	2	Gohir.A05G361750.1	20394	-	-	-	-	-	-	-	-
Gohir.D03G105400	D03	42184233	42184442	210	GhZFPH4_DAP-vs-GhZFPH4_neg_peak_5827	6.30063	11.8235	7.59644	1.50E-12	2.53E-08	Promoter (<=1kb)	42185003	42185665	663	1	Gohir.D03G105400.2	-561	IPR000218,IPR000630,IPR035987,IPR036853	Ribosomal protein L14P|Ribosomal protein S8|Ribosomal protein S8 superfamily|Ribosomal protein L14 superfamily	-	-	GO:0003735,GO:0005840,GO:0006412	structural constituent of ribosome|ribosome|translation	-	-
Gohir.D08G084000	D08	12399261	12399403	143	GhZFPH4_DAP-vs-GhZFPH4_neg_peak_6732	6.03947	96.9008	90.6634	1.26E-97	2.17E-91	Downstream (1-2kb)	12400808	12403769	2962	2	Gohir.D08G084000.1	4366	IPR013087,IPR036236	Zinc finger C2H2-type|Zinc finger C2H2 superfamily	-	-	-	-	-	-
Gohir.A12G172600	A12	96305164	96305901	738	GhZFPH4_DAP-vs-GhZFPH4_neg_peak_4705	5.98807	12.6839	8.41761	2.07E-13	3.82E-09	Distal Intergenic	96290224	96291309	1086	1	Gohir.A12G172600.1	14940	IPR039639	Protein IDA-like	-	-	GO:0010227	floral organ abscission	-	-
Gohir.A06G105700	A06	47144406	47144524	119	GhZFPH4_DAP-vs-GhZFPH4_neg_peak_2097	5.88507	15.7043	11.3159	1.98E-16	4.83E-12	Distal Intergenic	47290025	47290204	180	1	Gohir.A06G105700.1	-145501	-	-	-	-	-	-	-	-
Gohir.D03G024400	D03	2435745	2436058	314	GhZFPH4_DAP-vs-GhZFPH4_neg_peak_5685	5.76737	12.6839	8.41761	2.07E-13	3.82E-09	Distal Intergenic	2426116	2429203	3088	2	Gohir.D03G024400.1	-6542	IPR001471,IPR016177,IPR036955	AP2/ERF domain|DNA-binding domain superfamily|AP2/ERF domain superfamily	K09284	AP2-like factor, euAP2 lineage	GO:0003677,GO:0003700,GO:0006355	DNA binding|DNA-binding transcription factor activity|regulation of transcription, DNA-templated	ko01522	Endocrine resistance
Gohir.A04G042000	A04	9836826	9836974	149	GhZFPH4_DAP-vs-GhZFPH4_neg_peak_1298	5.73128	9.9287	5.79641	1.18E-10	1.60E-06	Distal Intergenic	9826614	9829718	3105	2	Gohir.A04G042000.1	-7108	IPR000257,IPR006361,IPR038071	Uroporphyrinogen decarboxylase (URO-D)|Uroporphyrinogen decarboxylase HemE|UROD/MetE-like superfamily	K01599	uroporphyrinogen decarboxylase [EC:4.1.1.37]	GO:0004853,GO:0006779	uroporphyrinogen decarboxylase activity|porphyrin-containing compound biosynthetic process	ko00860	Porphyrin and chlorophyll metabolism
Gohir.A04G057600	A04	34772607	34772766	160	GhZFPH4_DAP-vs-GhZFPH4_neg_peak_1379	5.73128	9.9287	5.79641	1.18E-10	1.60E-06	Distal Intergenic	34413697	34416940	3244	2	Gohir.A04G057600.1	-355667	IPR011032,IPR013149,IPR013154,IPR036291	GroES-like superfamily|Alcohol dehydrogenase, C-terminal|Alcohol dehydrogenase, N-terminal|NAD(P)-binding domain superfamily	K18857	alcohol dehydrogenase class-P [EC:1.1.1.1]	GO:0055114	oxidation-reduction process	ko00010,ko00071,ko00350,ko00592	Glycolysis / Gluconeogenesis|Fatty acid degradation|Tyrosine metabolism|alpha-Linolenic acid metabolism
Gohir.A10G135900	A10	77578297	77578451	155	GhZFPH4_DAP-vs-GhZFPH4_neg_peak_3851	5.73128	9.9287	5.79641	1.18E-10	1.60E-06	Promoter (<=1kb)	77578299	77580828	2530	1	Gohir.A10G135900.1	0	IPR001806,IPR005225,IPR027417	Small GTPase|Small GTP-binding protein domain|P-loop containing nucleoside triphosphate hydrolase	K07904	Ras-related protein Rab-11A	GO:0003924,GO:0005525	GTPase activity|GTP binding	ko01522,ko04144,ko04961,ko04962,ko04972,ko05164	Endocrine resistance|Endocytosis|Endocrine and other factor-regulated calcium reabsorption|Vasopressin-regulated water reabsorption|Pancreatic secretion|Influenza A
Gohir.D03G071400	D03	20894924	20895114	191	GhZFPH4_DAP-vs-GhZFPH4_neg_peak_5734	5.68464	9.85019	5.72248	1.41E-10	1.89E-06	Distal Intergenic	21056172	21068164	11993	2	Gohir.D03G071400.4	173050	IPR004843,IPR029052	Calcineurin-like phosphoesterase domain, ApaH type|Metallo-dependent phosphatase-like	-	-	GO:0016787	hydrolase activity	-	-
Gohir.A09G047500	A09	44525644	44525800	157	GhZFPH4_DAP-vs-GhZFPH4_neg_peak_3391	5.52212	9.57492	5.46217	2.66E-10	3.45E-06	Distal Intergenic	44323047	44324865	1819	1	Gohir.A09G047500.1	202597	IPR000315,IPR010402	B-box-type zinc finger|CCT domain	-	-	GO:0005515,GO:0008270	protein binding|zinc ion binding	-	-
Gohir.D04G151200	D04	53281688	53281855	168	GhZFPH4_DAP-vs-GhZFPH4_neg_peak_6062	5.49668	13.452	9.15314	3.53E-14	7.03E-10	Distal Intergenic	53270436	53274725	4290	2	Gohir.D04G151200.1	-6963	IPR005150,IPR013083,IPR029044	Cellulose synthase|Zinc finger, RING/FYVE/PHD-type|Nucleotide-diphospho-sugar transferases	K20924	cellulose synthase-like protein [EC:2.4.1.-]	GO:0016020,GO:0016760,GO:0030244	membrane|cellulose synthase (UDP-forming) activity|cellulose biosynthetic process	ko01522	Endocrine resistance
Gohir.A01G122666	A01	29974248	29974476	229	GhZFPH4_DAP-vs-GhZFPH4_neg_peak_91	5.44661	9.01737	4.93712	9.61E-10	1.16E-05	Distal Intergenic	29848996	29850260	1265	1	Gohir.A01G122666.1	125252	IPR011598,IPR036638	Myc-type, basic helix-loop-helix (bHLH) domain|Helix-loop-helix DNA-binding domain superfamily	-	-	GO:0046983	protein dimerization activity	-	-
Gohir.A01G138600	A01	56205069	56205197	129	GhZFPH4_DAP-vs-GhZFPH4_neg_peak_189	5.44661	9.01737	4.93712	9.61E-10	1.16E-05	Distal Intergenic	56150267	56153263	2997	2	Gohir.A01G138600.1	-51806	IPR000048	IQ motif, EF-hand binding site	-	-	GO:0005515	protein binding	-	-
Gohir.A02G107108	A02	77166438	77166747	310	GhZFPH4_DAP-vs-GhZFPH4_neg_peak_700	5.44661	9.01737	4.93712	9.61E-10	1.16E-05	Distal Intergenic	77223485	77230500	7016	1	Gohir.A02G107108.1	-56738	-	-	-	-	-	-	ko01522	Endocrine resistance
Gohir.A06G054000	A06	10110322	10110659	338	GhZFPH4_DAP-vs-GhZFPH4_neg_peak_1976	5.44661	9.01737	4.93712	9.61E-10	1.16E-05	Distal Intergenic	10121423	10132384	10962	1	Gohir.A06G054000.1	-10764	IPR000195,IPR021935,IPR035969	Rab-GTPase-TBC domain|Small G protein signalling modulator 1/2, Rab-binding domain|Rab-GTPase-TBC domain superfamily	K20168	TBC1 domain family member 15	-	-	ko01522,ko04137	Endocrine resistance|Mitophagy - animal
Gohir.A07G173600	A07	61715641	61715829	189	GhZFPH4_DAP-vs-GhZFPH4_neg_peak_2577	5.44661	9.01737	4.93712	9.61E-10	1.16E-05	Distal Intergenic	61297475	61301143	3669	1	Gohir.A07G173600.1	418166	IPR007656,IPR039306	GTD-binding domain|Myosin-binding protein	-	-	GO:0017022	myosin binding	-	-
Gohir.A13G107700	A13	75974355	75974495	141	GhZFPH4_DAP-vs-GhZFPH4_neg_peak_5033	5.44661	9.01737	4.93712	9.61E-10	1.16E-05	Promoter (<=1kb)	75973847	75977954	4108	1	Gohir.A13G107700.1	508	IPR000073,IPR029058	Alpha/beta hydrolase fold-1|Alpha/Beta hydrolase fold	-	-	-	-	-	-
Gohir.D01G037300	D01	4293130	4293313	184	GhZFPH4_DAP-vs-GhZFPH4_neg_peak_5150	5.44661	9.01737	4.93712	9.61E-10	1.16E-05	Promoter (1-2kb)	4291930	4294219	2290	1	Gohir.D01G037300.1	1200	IPR002305,IPR002307,IPR002942,IPR014729,IPR024088,IPR024107,IPR036986	Aminoacyl-tRNA synthetase, class Ic|Tyrosine-tRNA ligase|RNA-binding S4 domain|Rossmann-like alpha/beta/alpha sandwich fold|Tyrosine-tRNA ligase, bacterial-type|Tyrosine-tRNA ligase, bacterial-type, type 1|RNA-binding S4 domain superfamily	K01866	tyrosyl-tRNA synthetase [EC:6.1.1.1]	GO:0000166,GO:0003723,GO:0004812,GO:0004831,GO:0005524,GO:0006418,GO:0006437	nucleotide binding|RNA binding|aminoacyl-tRNA ligase activity|tyrosine-tRNA ligase activity|ATP binding|tRNA aminoacylation for protein translation|tyrosyl-tRNA aminoacylation	ko00970,ko01522	Aminoacyl-tRNA biosynthesis|Endocrine resistance
Gohir.D12G191033	D12	54215323	54215512	190	GhZFPH4_DAP-vs-GhZFPH4_neg_peak_7744	5.44661	9.01737	4.93712	9.61E-10	1.16E-05	Promoter (<=1kb)	54215192	54218314	3123	1	Gohir.D12G191033.1	131	-	-	-	-	-	-	-	-
Gohir.D07G165627	D07	31963022	31963345	324	GhZFPH4_DAP-vs-GhZFPH4_neg_peak_6612	5.36718	8.88584	4.81484	1.30E-09	1.53E-05	Promoter (<=1kb)	31962943	31964289	1347	1	Gohir.D07G165627.1	79	IPR008801	Rapid ALkalinization Factor	-	-	-	-	-	-
Gohir.D12G090701	D12	13171782	13171903	122	GhZFPH4_DAP-vs-GhZFPH4_neg_peak_7618	5.34115	10.1112	5.96949	7.74E-11	1.07E-06	Distal Intergenic	13176968	13177857	890	2	Gohir.D12G090701.1	5954	-	-	-	-	-	-	-	-
Gohir.A06G143600	A06	113286862	113287023	162	GhZFPH4_DAP-vs-GhZFPH4_neg_peak_2335	5.33253	8.82827	4.76106	1.49E-09	1.73E-05	Distal Intergenic	113292045	113296553	4509	1	Gohir.A06G143600.1	-5022	IPR000426,IPR001353,IPR023332,IPR029055	Proteasome alpha-subunit, N-terminal domain|Proteasome, subunit alpha/beta|Proteasome alpha-type subunit|Nucleophile aminohydrolases, N-terminal	K02729	20S proteasome subunit alpha 5 [EC:3.4.25.1]	GO:0004175,GO:0004298,GO:0005839,GO:0006511,GO:0019773,GO:0051603	endopeptidase activity|threonine-type endopeptidase activity|proteasome core complex|ubiquitin-dependent protein catabolic process|proteasome core complex, alpha-subunit complex|proteolysis involved in cellular protein catabolic process	ko01522,ko03050	Endocrine resistance|Proteasome
Gohir.A06G122200	A06	75531533	75531801	269	GhZFPH4_DAP-vs-GhZFPH4_neg_peak_2197	5.30313	9.19948	5.10866	6.32E-10	7.79E-06	Distal Intergenic	75952977	75954956	1980	2	Gohir.A06G122200.1	423155	IPR006094,IPR012951,IPR016166,IPR016167,IPR036318	FAD linked oxidase, N-terminal|Berberine/berberine-like|FAD-binding domain, PCMH-type|FAD-binding, type PCMH, subdomain 1|FAD-binding, type PCMH-like superfamily	K22395	cinnamyl-alcohol dehydrogenase [EC:1.1.1.195]	GO:0016491,GO:0050660,GO:0055114,GO:0071949	oxidoreductase activity|flavin adenine dinucleotide binding|oxidation-reduction process|FAD binding	ko00940	Phenylpropanoid biosynthesis
Gohir.D07G124401	D07	18625009	18625358	350	GhZFPH4_DAP-vs-GhZFPH4_neg_peak_6534	5.28139	8.74306	4.68112	1.81E-09	2.08E-05	Distal Intergenic	18591572	18592070	499	2	Gohir.D07G124401.1	-32939	IPR001841,IPR013083	Zinc finger, RING-type|Zinc finger, RING/FYVE/PHD-type	-	-	-	-	-	-
Gohir.A04G051850	A04	15843245	15843392	148	GhZFPH4_DAP-vs-GhZFPH4_neg_peak_1324	5.24784	8.68701	4.62879	2.06E-09	2.35E-05	Distal Intergenic	15934450	15934905	456	1	Gohir.A04G051850.1	-91058	IPR010264	Plant self-incompatibility S1	-	-	-	-	-	-
Gohir.D04G082800	D04	18322838	18323294	457	GhZFPH4_DAP-vs-GhZFPH4_neg_peak_5912	5.16579	8.54944	4.49939	2.82E-09	3.17E-05	Distal Intergenic	18346462	18353769	7308	1	Gohir.D04G082800.2	-23168	IPR000313	PWWP domain	-	-	-	-	-	-
Gohir.A01G137591	A01	53542721	53543011	291	GhZFPH4_DAP-vs-GhZFPH4_neg_peak_182	5.16193	9.01737	4.93712	9.61E-10	1.16E-05	Distal Intergenic	53603766	53608005	4240	1	Gohir.A01G137591.1	-60755	IPR036612	K Homology domain, type 1 superfamily	-	-	GO:0003723	RNA binding	-	-
Gohir.A02G133900	A02	99546445	99546808	364	GhZFPH4_DAP-vs-GhZFPH4_neg_peak_785	5.16193	9.01737	4.93712	9.61E-10	1.16E-05	Distal Intergenic	99553452	99559641	6190	1	Gohir.A02G133900.1	-6644	-	-	-	-	-	-	-	-
Gohir.A03G045500	A03	9631408	9631635	228	GhZFPH4_DAP-vs-GhZFPH4_neg_peak_858	5.16193	9.01737	4.93712	9.61E-10	1.16E-05	Promoter (1-2kb)	9633599	9637919	4321	1	Gohir.A03G045500.1	-1964	-	-	-	-	-	-	-	-
Gohir.A03G096600	A03	54553652	54553987	336	GhZFPH4_DAP-vs-GhZFPH4_neg_peak_1025	5.16193	9.01737	4.93712	9.61E-10	1.16E-05	Distal Intergenic	54152902	54155355	2454	1	Gohir.A03G096600.2	400750	IPR004873	BURP domain	-	-	-	-	-	-
Gohir.A05G303600	A05	43093414	43093651	238	GhZFPH4_DAP-vs-GhZFPH4_neg_peak_1706	5.16193	9.01737	4.93712	9.61E-10	1.16E-05	Distal Intergenic	43087116	43089615	2500	2	Gohir.A05G303600.2	-3799	-	-	-	-	-	-	-	-
Gohir.A06G062800	A06	14217132	14217277	146	GhZFPH4_DAP-vs-GhZFPH4_neg_peak_1989	5.16193	9.01737	4.93712	9.61E-10	1.16E-05	Distal Intergenic	14576638	14577914	1277	2	Gohir.A06G062800.1	360637	-	-	-	-	-	-	-	-
Gohir.A06G113000	A06	70405665	70405944	280	GhZFPH4_DAP-vs-GhZFPH4_neg_peak_2183	5.16193	9.01737	4.93712	9.61E-10	1.16E-05	Distal Intergenic	70210513	70211976	1464	1	Gohir.A06G113000.2	195152	IPR009025,IPR036603	DNA-directed RNA polymerase, RBP11-like dimerisation domain|RNA polymerase, RBP11-like subunit	K03020	DNA-directed RNA polymerases I and III subunit RPAC2	GO:0006351,GO:0046983	transcription, DNA-templated|protein dimerization activity	ko01522,ko03020,ko04623	Endocrine resistance|RNA polymerase|Cytosolic DNA-sensing pathway
Gohir.A07G089700	A07	15176630	15176749	120	GhZFPH4_DAP-vs-GhZFPH4_neg_peak_2415	5.16193	9.01737	4.93712	9.61E-10	1.16E-05	Distal Intergenic	15179949	15183879	3931	1	Gohir.A07G089700.2	-3200	IPR010471	Protein of unknown function DUF1068	-	-	-	-	-	-
Gohir.A07G092450	A07	15590293	15590437	145	GhZFPH4_DAP-vs-GhZFPH4_neg_peak_2417	5.16193	9.01737	4.93712	9.61E-10	1.16E-05	Distal Intergenic	15586085	15587515	1431	1	Gohir.A07G092450.1	4208	IPR010369	Protein of unknown function DUF966	-	-	-	-	-	-
Gohir.A07G168701	A07	77324386	77324594	209	GhZFPH4_DAP-vs-GhZFPH4_neg_peak_2638	5.16193	9.01737	4.93712	9.61E-10	1.16E-05	Distal Intergenic	77465846	77466312	467	1	Gohir.A07G168701.1	-141252	IPR012552	DVL	-	-	-	-	-	-
Gohir.A08G087500	A08	46115402	46115568	167	GhZFPH4_DAP-vs-GhZFPH4_neg_peak_2900	5.16193	9.01737	4.93712	9.61E-10	1.16E-05	Distal Intergenic	46144823	46148779	3957	2	Gohir.A08G087500.1	33211	IPR008506	SRP-independent targeting protein 2/TMEM208	-	-	-	-	-	-
Gohir.A08G090186	A08	32952771	32952950	180	GhZFPH4_DAP-vs-GhZFPH4_neg_peak_2859	5.16193	9.01737	4.93712	9.61E-10	1.16E-05	Distal Intergenic	32986336	32991517	5182	1	Gohir.A08G090186.1	-33386	IPR005475,IPR005477,IPR009014,IPR029061,IPR033248	Transketolase-like, pyrimidine-binding domain|Deoxyxylulose-5-phosphate synthase|Transketolase C-terminal/Pyruvate-ferredoxin oxidoreductase domain II|Thiamin diphosphate-binding fold|Transketolase, C-terminal domain	K01662	1-deoxy-D-xylulose-5-phosphate synthase [EC:2.2.1.7]	GO:0003824,GO:0008661,GO:0016114	catalytic activity|1-deoxy-D-xylulose-5-phosphate synthase activity|terpenoid biosynthetic process	ko00730,ko00900	Thiamine metabolism|Terpenoid backbone biosynthesis
Gohir.A08G158000	A08	112488148	112488263	116	GhZFPH4_DAP-vs-GhZFPH4_neg_peak_3091	5.16193	9.01737	4.93712	9.61E-10	1.16E-05	Distal Intergenic	112492007	112495288	3282	1	Gohir.A08G158000.1	-3744	IPR020966	Aluminum-activated malate transporter	-	-	GO:0015743	malate transport	-	-
Gohir.A12G083400	A12	58810445	58810760	316	GhZFPH4_DAP-vs-GhZFPH4_neg_peak_4553	5.16193	9.01737	4.93712	9.61E-10	1.16E-05	Distal Intergenic	58931459	58936145	4687	1	Gohir.A12G083400.1	-120699	IPR002775,IPR036882	DNA/RNA-binding protein Alba-like|Alba-like domain superfamily	-	-	GO:0003676	nucleic acid binding	-	-
Gohir.A12G173200	A12	96615211	96615389	179	GhZFPH4_DAP-vs-GhZFPH4_neg_peak_4707	5.16193	9.01737	4.93712	9.61E-10	1.16E-05	Distal Intergenic	96640742	96646230	5489	1	Gohir.A12G173200.1	-25353	IPR004331,IPR004342	SPX domain|EXS, C-terminal	-	-	GO:0016021	integral component of membrane	-	-
Gohir.A13G065500	A13	15042562	15042751	190	GhZFPH4_DAP-vs-GhZFPH4_neg_peak_4806	5.16193	9.01737	4.93712	9.61E-10	1.16E-05	Promoter (<=1kb)	15041550	15043340	1791	2	Gohir.A13G065500.1	589	IPR003441,IPR036093	NAC domain|NAC domain superfamily	-	-	GO:0003677,GO:0006355	DNA binding|regulation of transcription, DNA-templated	-	-
Gohir.A13G075900	A13	26957768	26958019	252	GhZFPH4_DAP-vs-GhZFPH4_neg_peak_4842	5.16193	9.01737	4.93712	9.61E-10	1.16E-05	Distal Intergenic	26844763	26846629	1867	2	Gohir.A13G075900.2	-111139	IPR036188	FAD/NAD(P)-binding domain superfamily	-	-	-	-	-	-
Gohir.A13G184600	A13	106081729	106081840	112	GhZFPH4_DAP-vs-GhZFPH4_neg_peak_5118	5.16193	9.01737	4.93712	9.61E-10	1.16E-05	Promoter (<=1kb)	106080301	106082286	1986	2	Gohir.A13G184600.1	446	IPR000530,IPR004038,IPR029064	Ribosomal protein S12e|Ribosomal protein L7Ae/L30e/S12e/Gadd45|50S ribosomal protein L30e-like	K02951	small subunit ribosomal protein S12e	GO:0003735,GO:0005840,GO:0006412	structural constituent of ribosome|ribosome|translation	ko01522,ko03010	Endocrine resistance|Ribosome
Gohir.D01G192700	D01	61952654	61952834	181	GhZFPH4_DAP-vs-GhZFPH4_neg_peak_5394	5.16193	9.01737	4.93712	9.61E-10	1.16E-05	Distal Intergenic	61960206	61961283	1078	2	Gohir.D01G192700.1	8449	IPR006458,IPR038933	Ovate protein family, C-terminal|Ovate protein family	-	-	GO:0045892	negative regulation of transcription, DNA-templated	-	-
Gohir.D02G164100	D02	61667582	61667939	358	GhZFPH4_DAP-vs-GhZFPH4_neg_peak_5647	5.16193	9.01737	4.93712	9.61E-10	1.16E-05	Distal Intergenic	61673696	61674908	1213	2	Gohir.D02G164100.1	6969	-	-	-	-	-	-	-	-
Gohir.D03G019750	D03	1738106	1738220	115	GhZFPH4_DAP-vs-GhZFPH4_neg_peak_5682	5.16193	9.01737	4.93712	9.61E-10	1.16E-05	Distal Intergenic	1731107	1732298	1192	2	Gohir.D03G019750.1	-5808	IPR003340,IPR015300,IPR039218	B3 DNA binding domain|DNA-binding pseudobarrel domain superfamily|REM family	-	-	GO:0003677	DNA binding	-	-
Gohir.D03G159400	D03	52606494	52606935	442	GhZFPH4_DAP-vs-GhZFPH4_neg_peak_5861	5.16193	9.01737	4.93712	9.61E-10	1.16E-05	Exon (Gohir.D03G159250.1/Gohir.D03G159250, exon 2 of 3)	52619246	52620913	1668	1	Gohir.D03G159400.1	-12311	IPR005175,IPR014476	PPC domain|AT-hook motif nuclear-localized protein 15-29	-	-	GO:0003680	AT DNA binding	-	-
Gohir.D04G008300	D04	1404517	1404657	141	GhZFPH4_DAP-vs-GhZFPH4_neg_peak_5876	5.16193	9.01737	4.93712	9.61E-10	1.16E-05	Promoter (1-2kb)	1400386	1403010	2625	2	Gohir.D04G008300.4	-1507	IPR000048	IQ motif, EF-hand binding site	-	-	GO:0005515	protein binding	-	-
Gohir.D04G068000	D04	13486344	13486550	207	GhZFPH4_DAP-vs-GhZFPH4_neg_peak_5898	5.16193	9.01737	4.93712	9.61E-10	1.16E-05	Distal Intergenic	13491783	13498827	7045	2	Gohir.D04G068000.3	12277	IPR001388,IPR015943,IPR036322,IPR042855	Synaptobrevin|WD40/YVTN repeat-like-containing domain superfamily|WD40-repeat-containing domain superfamily|v-SNARE, coiled-coil homology domain	K08518	syntaxin-binding protein 5	GO:0005515,GO:0016021,GO:0016192	protein binding|integral component of membrane|vesicle-mediated transport	ko01522	Endocrine resistance
Gohir.D05G070700	D05	5639912	5640082	171	GhZFPH4_DAP-vs-GhZFPH4_neg_peak_6088	5.16193	9.01737	4.93712	9.61E-10	1.16E-05	Downstream (1-2kb)	5641731	5643895	2165	2	Gohir.D05G070700.1	3813	-	-	-	-	-	-	-	-
Gohir.D07G074000	D07	8633205	8634019	815	GhZFPH4_DAP-vs-GhZFPH4_neg_peak_6509	5.16193	9.01737	4.93712	9.61E-10	1.16E-05	Distal Intergenic	8622481	8625358	2878	2	Gohir.D07G074000.1	-7847	IPR036236	Zinc finger C2H2 superfamily	-	-	-	-	-	-
Gohir.D08G113300	D08	34320197	34320413	217	GhZFPH4_DAP-vs-GhZFPH4_neg_peak_6841	5.16193	9.01737	4.93712	9.61E-10	1.16E-05	Promoter (<=1kb)	34320054	34322206	2153	1	Gohir.D08G113300.1	143	IPR001763,IPR036873,IPR043186	Rhodanese-like domain|Rhodanese-like domain superfamily|Rhodanese-like domain-containing protein 14	-	-	-	-	-	-
Gohir.D09G028500	D09	9278982	9279537	556	GhZFPH4_DAP-vs-GhZFPH4_neg_peak_7016	5.16193	9.01737	4.93712	9.61E-10	1.16E-05	Distal Intergenic	9308741	9309531	791	1	Gohir.D09G028500.1	-29204	IPR001210,IPR036401	Ribosomal protein S17e|Ribosomal protein S17e-like superfamily	K02962	small subunit ribosomal protein S17e	GO:0003735,GO:0005840,GO:0006412	structural constituent of ribosome|ribosome|translation	ko01522,ko03010	Endocrine resistance|Ribosome
Gohir.D10G065350	D10	6654138	6654319	182	GhZFPH4_DAP-vs-GhZFPH4_neg_peak_7163	5.16193	9.01737	4.93712	9.61E-10	1.16E-05	Intron (Gohir.D10G065350.1/Gohir.D10G065350, intron 1 of 4)	6646154	6662114	15961	1	Gohir.D10G065350.1	7984	-	-	-	-	-	-	-	-
Gohir.D11G115500	D11	10821218	10821505	288	GhZFPH4_DAP-vs-GhZFPH4_neg_peak_7376	5.16193	9.01737	4.93712	9.61E-10	1.16E-05	Distal Intergenic	10813868	10818034	4167	2	Gohir.D11G115500.2	-3184	-	-	-	-	GO:0006629,GO:0008970	lipid metabolic process|phospholipase A1 activity	-	-
Gohir.D11G244200	D11	52487275	52487571	297	GhZFPH4_DAP-vs-GhZFPH4_neg_peak_7519	5.16193	9.01737	4.93712	9.61E-10	1.16E-05	Distal Intergenic	52470853	52477997	7145	1	Gohir.D11G244200.5	16422	-	-	-	-	GO:0005515	protein binding	-	-
Gohir.D11G263300	D11	58741199	58741398	200	GhZFPH4_DAP-vs-GhZFPH4_neg_peak_7537	5.16193	9.01737	4.93712	9.61E-10	1.16E-05	Distal Intergenic	58734513	58736824	2312	1	Gohir.D11G263300.1	6686	-	-	-	-	-	-	-	-
Gohir.D11G296800	D11	64663625	64663978	354	GhZFPH4_DAP-vs-GhZFPH4_neg_peak_7553	5.16193	9.01737	4.93712	9.61E-10	1.16E-05	Distal Intergenic	64668924	64675503	6580	2	Gohir.D11G296800.3	11525	-	-	-	-	GO:0005515,GO:0007165,GO:0043531	protein binding|signal transduction|ADP binding	-	-
Gohir.A03G158400	A03	106337866	106338066	201	GhZFPH4_DAP-vs-GhZFPH4_neg_peak_1197	5.15363	9.00289	4.9251	9.93E-10	1.19E-05	Distal Intergenic	106397758	106401747	3990	1	Gohir.A03G158400.2	-59692	IPR001932,IPR015655,IPR036457	PPM-type phosphatase domain|Protein phosphatase 2C family|PPM-type phosphatase domain superfamily	-	-	GO:0003824,GO:0004722,GO:0006470	catalytic activity|protein serine/threonine phosphatase activity|protein dephosphorylation	-	-
Gohir.A06G105700	A06	47144812	47144933	122	GhZFPH4_DAP-vs-GhZFPH4_neg_peak_2098	5.1518	12.649	8.38444	2.24E-13	4.13E-09	Distal Intergenic	47290025	47290204	180	1	Gohir.A06G105700.1	-145092	-	-	-	-	-	-	-	-
Gohir.D13G081400	D13	16076526	16076728	203	GhZFPH4_DAP-vs-GhZFPH4_neg_peak_7813	5.14615	8.92686	4.85322	1.18E-09	1.40E-05	Promoter (2-3kb)	16073786	16079425	5640	1	Gohir.D13G081400.1	2740	-	-	K23870	putative pectin methyltransferase [EC:2.1.1.-]	GO:0008168	methyltransferase activity	ko01522	Endocrine resistance
Gohir.A06G110800	A06	82593419	82593701	283	GhZFPH4_DAP-vs-GhZFPH4_neg_peak_2235	5.13672	8.97338	4.8974	1.06E-09	1.27E-05	Distal Intergenic	82359107	82370612	11506	2	Gohir.A06G110800.1	-222807	IPR013830,IPR036514	SGNH hydrolase-type esterase domain|SGNH hydrolase superfamily	K23978	isoamyl acetate esterase [EC:3.1.1.112]	-	-	ko01522	Endocrine resistance
Gohir.A11G200200	A11	44797593	44797908	316	GhZFPH4_DAP-vs-GhZFPH4_neg_peak_4108	5.13672	8.97338	4.8974	1.06E-09	1.27E-05	Distal Intergenic	44680643	44681705	1063	2	Gohir.A11G200200.1	-115888	IPR001024,IPR010417,IPR036392,IPR037060	PLAT/LH2 domain|Embryo-specific ATS3|PLAT/LH2 domain superfamily|Catalase core domain superfamily	-	-	GO:0004096,GO:0005515,GO:0020037,GO:0055114	catalase activity|protein binding|heme binding|oxidation-reduction process	-	-
Gohir.A01G148518	A01	84389053	84389271	219	GhZFPH4_DAP-vs-GhZFPH4_neg_peak_313	5.11778	8.4686	4.42353	3.40E-09	3.77E-05	Distal Intergenic	84384437	84385208	772	1	Gohir.A01G148518.1	4616	IPR008417	B-cell receptor-associated protein 29/31	-	-	GO:0005783,GO:0006886,GO:0016021	endoplasmic reticulum|intracellular protein transport|integral component of membrane	-	-
Gohir.A04G053130	A04	36221471	36221865	395	GhZFPH4_DAP-vs-GhZFPH4_neg_peak_1393	5.10529	10.0802	5.93997	8.31E-11	1.15E-06	Distal Intergenic	35902105	35902410	306	1	Gohir.A04G053130.1	319366	IPR001133,IPR039428	NADH-ubiquinone oxidoreductase chain 4L/K|NADH-ubiquinone oxidoreductase chain 4L/Mnh complex subunit C1-like	K05576	NAD(P)H-quinone oxidoreductase subunit 4L [EC:7.1.1.2]	GO:0016651,GO:0042773,GO:0055114	oxidoreductase activity, acting on NAD(P)H|ATP synthesis coupled electron transport|oxidation-reduction process	ko00190	Oxidative phosphorylation
Gohir.A11G200616	A11	44083675	44084097	423	GhZFPH4_DAP-vs-GhZFPH4_neg_peak_4106	5.10529	10.0802	5.93997	8.31E-11	1.15E-06	Distal Intergenic	44144932	44145156	225	1	Gohir.A11G200616.1	-60835	-	-	-	-	-	-	-	-
Gohir.D13G099300	D13	29135750	29135901	152	GhZFPH4_DAP-vs-GhZFPH4_neg_peak_7855	5.10529	10.0802	5.93997	8.31E-11	1.15E-06	Distal Intergenic	28883754	28887438	3685	1	Gohir.D13G099300.5	251996	-	-	-	-	GO:0008080	N-acetyltransferase activity	-	-
Gohir.A04G059826	A04	36960601	36960812	212	GhZFPH4_DAP-vs-GhZFPH4_neg_peak_1395	5.10198	8.44193	4.39864	3.61E-09	3.99E-05	Distal Intergenic	37340266	37354365	14100	2	Gohir.A04G059826.1	393553	IPR002938,IPR028348,IPR036188	FAD-binding domain|FAD dependent protein|FAD/NAD(P)-binding domain superfamily	-	-	GO:0071949	FAD binding	-	-
Gohir.A05G322900	A05	66598765	66598869	105	GhZFPH4_DAP-vs-GhZFPH4_neg_peak_1816	5.08666	8.88584	4.81484	1.30E-09	1.53E-05	Distal Intergenic	66588428	66592153	3726	2	Gohir.A05G322900.2	-6612	IPR003480,IPR023213	Transferase|Chloramphenicol acetyltransferase-like domain superfamily	-	-	GO:0016747	transferase activity, transferring acyl groups other than amino-acyl groups	-	-
Gohir.A13G084300	A13	28630405	28630914	510	GhZFPH4_DAP-vs-GhZFPH4_neg_peak_4852	5.08666	8.88584	4.81484	1.30E-09	1.53E-05	Distal Intergenic	28497407	28501724	4318	1	Gohir.A13G084300.2	132998	IPR004333,IPR036893	SBP domain|SBP domain superfamily	-	-	GO:0003677,GO:0005634,GO:0042025	DNA binding|nucleus|host cell nucleus	-	-
Gohir.D03G000101	D03	22475	22742	268	GhZFPH4_DAP-vs-GhZFPH4_neg_peak_5678	5.08666	8.88584	4.81484	1.30E-09	1.53E-05	Distal Intergenic	38911	39277	367	2	Gohir.D03G000101.1	16535	-	-	-	-	-	-	-	-
Gohir.A12G120500	A12	83906325	83906496	172	GhZFPH4_DAP-vs-GhZFPH4_neg_peak_4662	5.07273	10.8292	6.65059	1.48E-11	2.24E-07	Promoter (<=1kb)	83903656	83905658	2003	2	Gohir.A12G120500.1	-667	IPR001733	Peptidase S26B	K13280	signal peptidase I [EC:3.4.21.89]	GO:0006465,GO:0008233,GO:0016020	signal peptide processing|peptidase activity|membrane	ko01522,ko03060	Endocrine resistance|Protein export
Gohir.A12G074500	A12	29700068	29700220	153	GhZFPH4_DAP-vs-GhZFPH4_neg_peak_4456	5.05841	9.58345	5.47009	2.61E-10	3.39E-06	Distal Intergenic	29584883	29586835	1953	2	Gohir.A12G074500.1	-113233	-	-	-	-	-	-	-	-
Gohir.D06G151800	D06	55959440	55959579	140	GhZFPH4_DAP-vs-GhZFPH4_neg_peak_6463	5.05382	8.82827	4.76106	1.49E-09	1.73E-05	Distal Intergenic	55975672	55978932	3261	2	Gohir.D06G151800.3	19353	IPR004154,IPR016061,IPR017449,IPR036621	Anticodon-binding|Proline-tRNA ligase, class II, C-terminal|Prolyl-tRNA synthetase, class II|Anticodon-binding domain superfamily	K01881	prolyl-tRNA synthetase [EC:6.1.1.15]	GO:0000166,GO:0004827,GO:0005524,GO:0005737,GO:0006433	nucleotide binding|proline-tRNA ligase activity|ATP binding|cytoplasm|prolyl-tRNA aminoacylation	ko00970,ko01522	Aminoacyl-tRNA biosynthesis|Endocrine resistance
Gohir.D11G223300	D11	36964807	36965057	251	GhZFPH4_DAP-vs-GhZFPH4_neg_peak_7464	5.05382	8.82827	4.76106	1.49E-09	1.73E-05	Distal Intergenic	37066747	37071064	4318	1	Gohir.D11G223300.1	-101690	-	-	K00232	acyl-CoA oxidase [EC:1.3.3.6]	GO:0003997,GO:0005777,GO:0006631,GO:0006635,GO:0016627,GO:0055114,GO:0071949	acyl-CoA oxidase activity|peroxisome|fatty acid metabolic process|fatty acid beta-oxidation|oxidoreductase activity, acting on the CH-CH group of donors|oxidation-reduction process|FAD binding	ko00071,ko00410,ko00592,ko00640,ko01040,ko03320,ko04024,ko04146	Fatty acid degradation|beta-Alanine metabolism|alpha-Linolenic acid metabolism|Propanoate metabolism|Biosynthesis of unsaturated fatty acids|PPAR signaling pathway|cAMP signaling pathway|Peroxisome
Gohir.A04G042160	A04	9969528	9969731	204	GhZFPH4_DAP-vs-GhZFPH4_neg_peak_1299	5.04168	8.74372	4.68175	1.80E-09	2.08E-05	Distal Intergenic	9997295	10000240	2946	2	Gohir.A04G042160.1	30509	IPR001611,IPR013210,IPR032675	Leucine-rich repeat|Leucine-rich repeat-containing N-terminal, plant-type|Leucine-rich repeat domain superfamily	-	-	GO:0005515	protein binding	-	-
Gohir.D02G109200	D02	29928853	29929083	231	GhZFPH4_DAP-vs-GhZFPH4_neg_peak_5501	5.04168	8.74372	4.68175	1.80E-09	2.08E-05	Distal Intergenic	29952825	29955846	3022	2	Gohir.D02G109200.1	26763	-	-	K03104	signal recognition particle subunit SRP14	-	-	ko01522,ko03060	Endocrine resistance|Protein export
Gohir.D05G368026	D05	63180653	63180895	243	GhZFPH4_DAP-vs-GhZFPH4_neg_peak_6254	5.03973	8.33659	4.30027	4.61E-09	5.01E-05	Distal Intergenic	63194498	63194782	285	2	Gohir.D05G368026.1	13887	-	-	-	-	-	-	-	-
Gohir.A03G117000	A03	78312481	78312761	281	GhZFPH4_DAP-vs-GhZFPH4_neg_peak_1096	5.0214	8.77131	4.7072	1.69E-09	1.96E-05	Distal Intergenic	78386685	78392866	6182	2	Gohir.A03G117000.1	80105	IPR007238,IPR016558	DNA primase large subunit, eukaryotic/archaeal|DNA primase, large subunit, eukaryotic	-	-	GO:0006269	DNA replication, synthesis of RNA primer	ko01522,ko03030	Endocrine resistance|DNA replication
Gohir.A12G099600	A12	78336248	78336495	248	GhZFPH4_DAP-vs-GhZFPH4_neg_peak_4649	5.01261	8.69249	4.63404	2.03E-09	2.32E-05	Distal Intergenic	78126488	78129418	2931	1	Gohir.A12G099600.2	209760	IPR006153,IPR038770	Cation/H+ exchanger|Sodium/solute symporter superfamily	-	-	GO:0006812,GO:0015299,GO:0016021,GO:0055085	cation transport|solute:proton antiporter activity|integral component of membrane|transmembrane transport	-	-
Gohir.A11G288900	A11	117292477	117292913	437	GhZFPH4_DAP-vs-GhZFPH4_neg_peak_4347	4.98748	10.2501	6.10092	5.62E-11	7.93E-07	Distal Intergenic	117266326	117271542	5217	2	Gohir.A11G288900.1	-20935	IPR025846,IPR026057,IPR029962	PMR5 N-terminal domain|PC-Esterase|Trichome birefringence-like family	-	-	-	-	-	-
Gohir.A02G091400	A02	26414311	26414571	261	GhZFPH4_DAP-vs-GhZFPH4_neg_peak_515	4.97355	8.68701	4.62879	2.06E-09	2.35E-05	Distal Intergenic	26468438	26471257	2820	1	Gohir.A02G091400.1	-53867	-	-	K03104	signal recognition particle subunit SRP14	-	-	ko01522,ko03060	Endocrine resistance|Protein export
Gohir.D02G120500	D02	41685165	41685376	212	GhZFPH4_DAP-vs-GhZFPH4_neg_peak_5561	4.97355	8.68701	4.62879	2.06E-09	2.35E-05	Distal Intergenic	41615834	41638082	22249	2	Gohir.D02G120500.3	-47083	-	-	-	-	-	-	ko01522	Endocrine resistance
Gohir.A07G187699	A07	88835262	88835490	229	GhZFPH4_DAP-vs-GhZFPH4_neg_peak_2705	4.96701	11.0053	6.81755	9.88E-12	1.52E-07	Distal Intergenic	88631442	88631942	501	1	Gohir.A07G187699.1	203820	IPR005135,IPR036691	Endonuclease/exonuclease/phosphatase|Endonuclease/exonuclease/phosphatase superfamily	-	-	-	-	-	-
Gohir.D10G117200	D10	19667371	19667632	262	GhZFPH4_DAP-vs-GhZFPH4_neg_peak_7200	4.9578	8.65921	4.60271	2.19E-09	2.50E-05	Distal Intergenic	19685547	19686590	1044	2	Gohir.D10G117200.1	18958	-	-	-	-	-	-	-	-
Gohir.D08G108108	D08	37582695	37584006	1312	GhZFPH4_DAP-vs-GhZFPH4_neg_peak_6863	4.93434	9.74481	5.62291	1.80E-10	2.38E-06	Distal Intergenic	37606582	37607866	1285	2	Gohir.D08G108108.1	23860	IPR001135,IPR029014,IPR038290	NADH-quinone oxidoreductase, subunit D|[NiFe]-hydrogenase, large subunit|NADH-quinone oxidoreductase, subunit D superfamily	-	-	GO:0016651,GO:0048038,GO:0051287,GO:0055114	oxidoreductase activity, acting on NAD(P)H|quinone binding|NAD binding|oxidation-reduction process	-	-
Gohir.A08G058600	A08	9298280	9298782	503	GhZFPH4_DAP-vs-GhZFPH4_neg_peak_2756	4.92894	10.9235	6.73991	1.19E-11	1.82E-07	Distal Intergenic	9303359	9304236	878	2	Gohir.A08G058600.1	5454	IPR001471,IPR016177,IPR036955	AP2/ERF domain|DNA-binding domain superfamily|AP2/ERF domain superfamily	K09286	EREBP-like factor	GO:0003677,GO:0003700,GO:0006355	DNA binding|DNA-binding transcription factor activity|regulation of transcription, DNA-templated	ko01522	Endocrine resistance
Gohir.A03G041800	A03	8556467	8556738	272	GhZFPH4_DAP-vs-GhZFPH4_neg_peak_854	4.92798	9.33574	5.23659	4.62E-10	5.80E-06	Distal Intergenic	8596322	8600126	3805	1	Gohir.A03G041800.1	-39584	IPR004000,IPR043129	Actin family|ATPase, nucleotide binding domain	-	-	-	-	ko01522	Endocrine resistance
Gohir.A01G140678	A01	62666322	62666484	163	GhZFPH4_DAP-vs-GhZFPH4_neg_peak_216	4.9266	8.60404	4.55084	2.49E-09	2.81E-05	Distal Intergenic	62560415	62563009	2595	2	Gohir.A01G140678.2	-103313	-	-	-	-	-	-	-	-
Gohir.A01G150000	A01	81228400	81228655	256	GhZFPH4_DAP-vs-GhZFPH4_neg_peak_299	4.9266	8.60404	4.55084	2.49E-09	2.81E-05	Distal Intergenic	81325505	81329717	4213	1	Gohir.A01G150000.3	-96850	IPR007656,IPR039306	GTD-binding domain|Myosin-binding protein	-	-	GO:0017022	myosin binding	-	-
Gohir.A06G099200	A06	38843838	38844265	428	GhZFPH4_DAP-vs-GhZFPH4_neg_peak_2063	4.9266	8.60404	4.55084	2.49E-09	2.81E-05	Distal Intergenic	38822625	38824962	2338	1	Gohir.A06G099200.5	21213	IPR013784,IPR019008,IPR039163	Carbohydrate-binding-like fold|Domain of unknown function DUF2012|ER membrane protein complex subunit 7	K23568	ER membrane protein complex subunit 7	GO:0030246	carbohydrate binding	ko01522	Endocrine resistance
Gohir.A10G118700	A10	50101050	50101184	135	GhZFPH4_DAP-vs-GhZFPH4_neg_peak_3750	4.9266	8.60404	4.55084	2.49E-09	2.81E-05	Distal Intergenic	50249594	50250857	1264	1	Gohir.A10G118700.1	-148410	IPR039455	EPIDERMAL PATTERNING FACTOR-like protein	-	-	GO:0010374	stomatal complex development	-	-
Gohir.A02G084700	A02	28698529	28698802	274	GhZFPH4_DAP-vs-GhZFPH4_neg_peak_526	4.91115	8.57667	4.52513	2.65E-09	2.98E-05	Distal Intergenic	28806405	28811730	5326	1	Gohir.A02G084700.1	-107603	-	-	-	-	-	-	-	-
Gohir.A13G094700	A13	83410998	83411284	287	GhZFPH4_DAP-vs-GhZFPH4_neg_peak_5054	4.91115	8.57667	4.52513	2.65E-09	2.98E-05	Distal Intergenic	83469280	83471049	1770	2	Gohir.A13G094700.1	59765	IPR001128,IPR002401,IPR036396	Cytochrome P450|Cytochrome P450, E-class, group I|Cytochrome P450 superfamily	K20667	beta-amyrin 28-monooxygenase [EC:1.14.14.126]	GO:0005506,GO:0016705,GO:0020037,GO:0055114	iron ion binding|oxidoreductase activity, acting on paired donors, with incorporation or reduction of molecular oxygen|heme binding|oxidation-reduction process	ko01522	Endocrine resistance
Gohir.A03G115400	A03	85826974	85827108	135	GhZFPH4_DAP-vs-GhZFPH4_neg_peak_1114	4.8958	8.54944	4.49939	2.82E-09	3.17E-05	Distal Intergenic	85778755	85787032	8278	2	Gohir.A03G115400.1	-39942	IPR004870,IPR007187,IPR014908,IPR042533,IPR042537,IPR042538	Nucleoporin, Nup155-like|Nucleoporin, Nup133/Nup155-like, C-terminal|Nucleoporin, Nup133/Nup155-like, N-terminal|Nucleoporin, Nup155-like, C-terminal, subdomain 1|Nucleoporin, Nup155-like, C-terminal, subdomain 2|Nucleoporin, Nup155-like, C-terminal, subdomain 3	K14312	nuclear pore complex protein Nup155	GO:0005643,GO:0006913,GO:0017056	nuclear pore|nucleocytoplasmic transport|structural constituent of nuclear pore	ko01522,ko03013	Endocrine resistance|RNA transport
Gohir.D10G140000	D10	27828124	27828267	144	GhZFPH4_DAP-vs-GhZFPH4_neg_peak_7234	4.89054	8.08228	4.06453	8.27E-09	8.62E-05	Distal Intergenic	27936613	27954774	18162	1	Gohir.D10G140000.1	-108346	-	-	-	-	-	-	-	-
Gohir.A09G058400	A09	55184232	55184425	194	GhZFPH4_DAP-vs-GhZFPH4_neg_peak_3422	4.88053	8.52236	4.47428	3.00E-09	3.36E-05	Distal Intergenic	55163728	55168771	5044	1	Gohir.A09G058400.1	20504	IPR004738,IPR005828,IPR020846,IPR036259	Phosphate permease|Major facilitator, sugar transporter-like|Major facilitator superfamily domain|MFS transporter superfamily	-	-	GO:0005315,GO:0006817,GO:0016021,GO:0022857,GO:0055085	inorganic phosphate transmembrane transporter activity|phosphate ion transport|integral component of membrane|transmembrane transporter activity|transmembrane transport	ko01522	Endocrine resistance
Gohir.A01G098800	A01	17559488	17559997	510	GhZFPH4_DAP-vs-GhZFPH4_neg_peak_49	4.87726	8.13193	4.10855	7.38E-09	7.79E-05	Distal Intergenic	17640803	17643448	2646	1	Gohir.A01G098800.1	-80806	IPR019446,IPR029063	Domain of unknown function DUF2431|S-adenosyl-L-methionine-dependent methyltransferase	K19307	25S rRNA (uracil2634-N3)-methyltransferase [EC:2.1.1.313]	-	-	ko01522	Endocrine resistance
Gohir.A01G128000	A01	40012532	40012791	260	GhZFPH4_DAP-vs-GhZFPH4_neg_peak_131	4.87726	8.13193	4.10855	7.38E-09	7.79E-05	Distal Intergenic	39986508	39989251	2744	1	Gohir.A01G128000.2	26024	IPR000504,IPR012677,IPR035979	RNA recognition motif domain|Nucleotide-binding alpha-beta plait domain superfamily|RNA-binding domain superfamily	-	-	GO:0003676	nucleic acid binding	-	-
Gohir.A01G128300	A01	38905734	38905892	159	GhZFPH4_DAP-vs-GhZFPH4_neg_peak_125	4.87726	8.13193	4.10855	7.38E-09	7.79E-05	Promoter (2-3kb)	38908721	38914346	5626	1	Gohir.A01G128300.1	-2829	IPR001357,IPR001841,IPR011364,IPR013083,IPR031099,IPR034732,IPR036420	BRCT domain|Zinc finger, RING-type|Breast cancer type 1 susceptibility protein (BRCA1)|Zinc finger, RING/FYVE/PHD-type|BRCA1-associated|Extended PHD (ePHD) domain|BRCT domain superfamily	K10683	BRCA1-associated RING domain protein 1	GO:0003677,GO:0004842,GO:0005634,GO:0006281,GO:0006974,GO:0008270	DNA binding|ubiquitin-protein transferase activity|nucleus|DNA repair|cellular response to DNA damage stimulus|zinc ion binding	ko01522,ko03440	Endocrine resistance|Homologous recombination
Gohir.A02G060700	A02	9974214	9974422	209	GhZFPH4_DAP-vs-GhZFPH4_neg_peak_452	4.87726	8.13193	4.10855	7.38E-09	7.79E-05	Distal Intergenic	9969231	9971593	2363	1	Gohir.A02G060700.1	4983	-	-	-	-	-	-	-	-
Gohir.A02G083101	A02	30614518	30614744	227	GhZFPH4_DAP-vs-GhZFPH4_neg_peak_538	4.87726	8.13193	4.10855	7.38E-09	7.79E-05	Distal Intergenic	30785245	30785664	420	2	Gohir.A02G083101.1	170920	-	-	-	-	-	-	-	-
Gohir.A02G122900	A02	88550349	88550543	195	GhZFPH4_DAP-vs-GhZFPH4_neg_peak_739	4.87726	8.13193	4.10855	7.38E-09	7.79E-05	Distal Intergenic	88632157	88637402	5246	2	Gohir.A02G122900.1	86859	-	-	K15918	D-glycerate 3-kinase [EC:2.7.1.31]	-	-	ko00260,ko00561,ko00630	Glycine, serine and threonine metabolism|Glycerolipid metabolism|Glyoxylate and dicarboxylate metabolism
Gohir.A02G150200	A02	104888033	104888622	590	GhZFPH4_DAP-vs-GhZFPH4_neg_peak_816	4.87726	8.13193	4.10855	7.38E-09	7.79E-05	Promoter (2-3kb)	104887467	104890878	3412	2	Gohir.A02G150200.1	2256	-	-	-	-	-	-	-	-
Gohir.A03G033600	A03	6456015	6456172	158	GhZFPH4_DAP-vs-GhZFPH4_neg_peak_849	4.87726	8.13193	4.10855	7.38E-09	7.79E-05	Distal Intergenic	6483174	6484194	1021	2	Gohir.A03G033600.1	28022	IPR007608	Senescence regulator S40	-	-	-	-	-	-
Gohir.A03G076800	A03	33203549	33203842	294	GhZFPH4_DAP-vs-GhZFPH4_neg_peak_945	4.87726	8.13193	4.10855	7.38E-09	7.79E-05	Distal Intergenic	33115437	33116067	631	1	Gohir.A03G076800.1	88112	IPR002048,IPR011992	EF-hand domain|EF-hand domain pair	-	-	GO:0005509	calcium ion binding	-	-
Gohir.A03G079900	A03	30182930	30183167	238	GhZFPH4_DAP-vs-GhZFPH4_neg_peak_935	4.87726	8.13193	4.10855	7.38E-09	7.79E-05	Distal Intergenic	29623498	29628954	5457	1	Gohir.A03G079900.3	559432	IPR005123	Oxoglutarate/iron-dependent dioxygenase	-	-	GO:0016491,GO:0055114	oxidoreductase activity|oxidation-reduction process	-	-
Gohir.A03G109200	A03	71886275	71886461	187	GhZFPH4_DAP-vs-GhZFPH4_neg_peak_1075	4.87726	8.13193	4.10855	7.38E-09	7.79E-05	Distal Intergenic	71815907	71821262	5356	2	Gohir.A03G109200.2	-65013	IPR001356,IPR002913,IPR009057,IPR023393,IPR042160	Homeobox domain|START domain|Homeobox-like domain superfamily|START-like domain superfamily|Homeobox-leucine zipper protein GLABRA2/ANL2/PDF2/ATML1-like	K09338	homeobox-leucine zipper protein	GO:0003677,GO:0008289	DNA binding|lipid binding	ko01522	Endocrine resistance
Gohir.A03G115776	A03	85147635	85147765	131	GhZFPH4_DAP-vs-GhZFPH4_neg_peak_1113	4.87726	8.13193	4.10855	7.38E-09	7.79E-05	Distal Intergenic	85128078	85133991	5914	2	Gohir.A03G115776.1	-13644	IPR001251,IPR036865	CRAL-TRIO lipid binding domain|CRAL-TRIO lipid binding domain superfamily	-	-	-	-	-	-
Gohir.A03G171100	A03	108622475	108622677	203	GhZFPH4_DAP-vs-GhZFPH4_neg_peak_1205	4.87726	8.13193	4.10855	7.38E-09	7.79E-05	Distal Intergenic	108625923	108627077	1155	1	Gohir.A03G171100.1	-3246	-	-	-	-	-	-	-	-
Gohir.A04G059778	A04	44966519	44966772	254	GhZFPH4_DAP-vs-GhZFPH4_neg_peak_1434	4.87726	8.13193	4.10855	7.38E-09	7.79E-05	Distal Intergenic	44920837	44930774	9938	1	Gohir.A04G059778.1	45682	IPR011685	LETM1-like	-	-	-	-	-	-
Gohir.A05G334400	A05	82215031	82215207	177	GhZFPH4_DAP-vs-GhZFPH4_neg_peak_1864	4.87726	8.13193	4.10855	7.38E-09	7.79E-05	Distal Intergenic	82289039	82296588	7550	1	Gohir.A05G334400.1	-73832	IPR001214,IPR003105,IPR003616,IPR007728,IPR015947,IPR025794,IPR036987	SET domain|SRA-YDG|Post-SET domain|Pre-SET domain|PUA-like superfamily|Histone H3-K9 methyltransferase, plant|SRA-YDG superfamily	-	-	GO:0005515,GO:0005634,GO:0008270,GO:0016571,GO:0018024,GO:0034968	protein binding|nucleus|zinc ion binding|histone methylation|histone-lysine N-methyltransferase activity|histone lysine methylation	-	-
Gohir.A05G393450	A05	107670353	107670555	203	GhZFPH4_DAP-vs-GhZFPH4_neg_peak_1939	4.87726	8.13193	4.10855	7.38E-09	7.79E-05	Promoter (2-3kb)	107668161	107668742	582	1	Gohir.A05G393450.1	2192	-	-	-	-	-	-	-	-
Gohir.A06G104000	A06	44720745	44720891	147	GhZFPH4_DAP-vs-GhZFPH4_neg_peak_2079	4.87726	8.13193	4.10855	7.38E-09	7.79E-05	Distal Intergenic	44798599	44809270	10672	1	Gohir.A06G104000.1	-77708	IPR004147,IPR011009	UbiB domain|Protein kinase-like domain superfamily	K08869	aarF domain-containing kinase	-	-	ko01522	Endocrine resistance
Gohir.A06G119600	A06	77879371	77879537	167	GhZFPH4_DAP-vs-GhZFPH4_neg_peak_2211	4.87726	8.13193	4.10855	7.38E-09	7.79E-05	Distal Intergenic	78092773	78103410	10638	2	Gohir.A06G119600.3	223873	IPR026610,IPR029063,IPR040813,IPR040870	3'-RNA ribose 2'-O-methyltransferase, Hen1|S-adenosyl-L-methionine-dependent methyltransferase|Small RNA 2'-O-methyltransferase Hen1, La-motif C-terminal domain|HEN1, double-stranded RNA binding domain 2	K20798	small RNA 2'-O-methyltransferase [EC:2.1.1.-]	GO:0001510,GO:0008171,GO:0008173	RNA methylation|O-methyltransferase activity|RNA methyltransferase activity	ko01522	Endocrine resistance
Gohir.A06G123802	A06	91789415	91789586	172	GhZFPH4_DAP-vs-GhZFPH4_neg_peak_2274	4.87726	8.13193	4.10855	7.38E-09	7.79E-05	Promoter (1-2kb)	91791576	91791743	168	1	Gohir.A06G123802.1	-1990	-	-	-	-	-	-	-	-
Gohir.A07G107800	A07	19917310	19917446	137	GhZFPH4_DAP-vs-GhZFPH4_neg_peak_2430	4.87726	8.13193	4.10855	7.38E-09	7.79E-05	Promoter (<=1kb)	19917184	19918470	1287	1	Gohir.A07G107800.1	126	IPR008586	Protein of unknown function DUF868, plant	-	-	-	-	-	-
Gohir.A08G062100	A08	10696477	10696880	404	GhZFPH4_DAP-vs-GhZFPH4_neg_peak_2764	4.87726	8.13193	4.10855	7.38E-09	7.79E-05	Promoter (2-3kb)	10689461	10694452	4992	2	Gohir.A08G062100.1	-2025	IPR011598,IPR036638	Myc-type, basic helix-loop-helix (bHLH) domain|Helix-loop-helix DNA-binding domain superfamily	-	-	GO:0046983	protein dimerization activity	-	-
Gohir.A08G095662	A08	59889898	59890127	230	GhZFPH4_DAP-vs-GhZFPH4_neg_peak_2944	4.87726	8.13193	4.10855	7.38E-09	7.79E-05	Distal Intergenic	60086402	60087268	867	1	Gohir.A08G095662.1	-196275	IPR002866,IPR024937,IPR024942	Maturase MatK|Domain X|Maturase MatK, N-terminal domain	-	-	GO:0006397,GO:0009507	mRNA processing|chloroplast	-	-
Gohir.A08G101900	A08	68157152	68157275	124	GhZFPH4_DAP-vs-GhZFPH4_neg_peak_2965	4.87726	8.13193	4.10855	7.38E-09	7.79E-05	Distal Intergenic	68173483	68176297	2815	1	Gohir.A08G101900.10	-16208	IPR003851	Zinc finger, Dof-type	-	-	GO:0003677,GO:0006355	DNA binding|regulation of transcription, DNA-templated	-	-
Gohir.A09G135600	A09	73088093	73088307	215	GhZFPH4_DAP-vs-GhZFPH4_neg_peak_3545	4.87726	8.13193	4.10855	7.38E-09	7.79E-05	Promoter (<=1kb)	73089263	73097045	7783	1	Gohir.A09G135600.2	-956	IPR000719,IPR001245,IPR011009,IPR028324	Protein kinase domain|Serine-threonine/tyrosine-protein kinase, catalytic domain|Protein kinase-like domain superfamily|Serine/threonine-protein kinase CTR1	K14510	serine/threonine-protein kinase CTR1 [EC:2.7.11.1]	GO:0004672,GO:0005524,GO:0006468	protein kinase activity|ATP binding|protein phosphorylation	ko01522,ko04016,ko04075	Endocrine resistance|MAPK signaling pathway - plant|Plant hormone signal transduction
Gohir.A10G042580	A10	4255577	4255752	176	GhZFPH4_DAP-vs-GhZFPH4_neg_peak_3591	4.87726	8.13193	4.10855	7.38E-09	7.79E-05	Promoter (1-2kb)	4254085	4256996	2912	2	Gohir.A10G042580.1	1244	IPR003663,IPR005828,IPR020846,IPR036259	Sugar/inositol transporter|Major facilitator, sugar transporter-like|Major facilitator superfamily domain|MFS transporter superfamily	-	-	GO:0016020,GO:0016021,GO:0022857,GO:0055085	membrane|integral component of membrane|transmembrane transporter activity|transmembrane transport	ko01522	Endocrine resistance
Gohir.A10G084400	A10	14957462	14957762	301	GhZFPH4_DAP-vs-GhZFPH4_neg_peak_3620	4.87726	8.13193	4.10855	7.38E-09	7.79E-05	Distal Intergenic	14976967	14980041	3075	1	Gohir.A10G084400.2	-19205	IPR005574,IPR010997,IPR038324	RNA polymerase subunit RPB4/RPC9|HRDC-like superfamily|Rpb4/RPC9 superfamily	K03012	DNA-directed RNA polymerase II subunit RPB4	GO:0000166,GO:0003824,GO:0006352,GO:0030880,GO:0044237	nucleotide binding|catalytic activity|DNA-templated transcription, initiation|RNA polymerase complex|cellular metabolic process	ko01522,ko03020	Endocrine resistance|RNA polymerase
Gohir.A10G113500	A10	35958941	35959109	169	GhZFPH4_DAP-vs-GhZFPH4_neg_peak_3704	4.87726	8.13193	4.10855	7.38E-09	7.79E-05	Distal Intergenic	36038044	36046772	8729	1	Gohir.A10G113500.1	-78935	IPR002083,IPR008974	MATH/TRAF domain|TRAF-like	-	-	GO:0005515	protein binding	-	-
Gohir.A10G117100	A10	42815983	42816218	236	GhZFPH4_DAP-vs-GhZFPH4_neg_peak_3728	4.87726	8.13193	4.10855	7.38E-09	7.79E-05	Distal Intergenic	42613064	42620117	7054	1	Gohir.A10G117100.6	202919	IPR039317	Protein time for coffee	-	-	GO:0042752	regulation of circadian rhythm	-	-
Gohir.A10G122300	A10	64666084	64666635	552	GhZFPH4_DAP-vs-GhZFPH4_neg_peak_3802	4.87726	8.13193	4.10855	7.38E-09	7.79E-05	Distal Intergenic	64417347	64419549	2203	2	Gohir.A10G122300.3	-246535	IPR025886,IPR036047	Phloem protein 2-like|F-box-like domain superfamily	-	-	GO:0005515	protein binding	-	-
Gohir.A10G158200	A10	93228351	93228481	131	GhZFPH4_DAP-vs-GhZFPH4_neg_peak_3906	4.87726	8.13193	4.10855	7.38E-09	7.79E-05	Distal Intergenic	93212410	93215502	3093	2	Gohir.A10G158200.1	-12849	IPR000109,IPR036259	Proton-dependent oligopeptide transporter family|MFS transporter superfamily	-	-	GO:0016020,GO:0022857,GO:0055085	membrane|transmembrane transporter activity|transmembrane transport	-	-
Gohir.A10G197600	A10	109080082	109080206	125	GhZFPH4_DAP-vs-GhZFPH4_neg_peak_3955	4.87726	8.13193	4.10855	7.38E-09	7.79E-05	Distal Intergenic	109045966	109048821	2856	1	Gohir.A10G197600.1	34116	IPR002293,IPR029485	Amino acid/polyamine transporter I|Cationic amino acid transporter, C-terminal	-	-	GO:0016020,GO:0022857,GO:0055085	membrane|transmembrane transporter activity|transmembrane transport	-	-
Gohir.A11G102500	A11	10739195	10739376	182	GhZFPH4_DAP-vs-GhZFPH4_neg_peak_4011	4.87726	8.13193	4.10855	7.38E-09	7.79E-05	Promoter (2-3kb)	10737407	10742052	4646	2	Gohir.A11G102500.1	2676	IPR002048,IPR005135,IPR011992,IPR036691	EF-hand domain|Endonuclease/exonuclease/phosphatase|EF-hand domain pair|Endonuclease/exonuclease/phosphatase superfamily	K18729	protein angel	GO:0005509	calcium ion binding	ko01522	Endocrine resistance
Gohir.A11G200216	A11	45484211	45484335	125	GhZFPH4_DAP-vs-GhZFPH4_neg_peak_4114	4.87726	8.13193	4.10855	7.38E-09	7.79E-05	Distal Intergenic	45895933	45898253	2321	2	Gohir.A11G200216.1	413918	IPR003337,IPR006379,IPR023214,IPR036412	Trehalose-phosphatase|HAD-superfamily hydrolase, subfamily IIB|HAD superfamily|HAD-like superfamily	K01087	trehalose 6-phosphate phosphatase [EC:3.1.3.12]	GO:0003824,GO:0005992	catalytic activity|trehalose biosynthetic process	ko00500	Starch and sucrose metabolism
Gohir.A11G225204	A11	77104699	77104885	187	GhZFPH4_DAP-vs-GhZFPH4_neg_peak_4218	4.87726	8.13193	4.10855	7.38E-09	7.79E-05	Distal Intergenic	77438083	77439161	1079	2	Gohir.A11G225204.1	334276	IPR001841,IPR013083	Zinc finger, RING-type|Zinc finger, RING/FYVE/PHD-type	K19040	E3 ubiquitin-protein ligase ATL10/75/76/77/78 [EC:2.3.2.27]	-	-	ko01522	Endocrine resistance
Gohir.A11G236340	A11	98332896	98333056	161	GhZFPH4_DAP-vs-GhZFPH4_neg_peak_4293	4.87726	8.13193	4.10855	7.38E-09	7.79E-05	Distal Intergenic	98303284	98308075	4792	2	Gohir.A11G236340.2	-24821	IPR012474	Frigida-like	-	-	-	-	-	-
Gohir.A12G027900	A12	3930471	3930786	316	GhZFPH4_DAP-vs-GhZFPH4_neg_peak_4379	4.87726	8.13193	4.10855	7.38E-09	7.79E-05	Distal Intergenic	3897289	3927224	29936	2	Gohir.A12G027900.4	-3247	IPR009448,IPR029044,IPR040497,IPR040525,IPR040692,IPR040693,IPR040694	UDP-glucose:Glycoprotein Glucosyltransferase|Nucleotide-diphospho-sugar transferases|Glucosyltransferase 24, catalytic domain|UDP-glucose:glycoprotein glucosyltransferase, thioredoxin-like domain 4|UGGT, thioredoxin-like domain 3|UGGT, thioredoxin-like domain 1|UGGT, thioredoxin-like domain 2	K11718	UDP-glucose:glycoprotein glucosyltransferase [EC:2.4.1.-]	GO:0003980,GO:0006486	UDP-glucose:glycoprotein glucosyltransferase activity|protein glycosylation	ko01522,ko04141	Endocrine resistance|Protein processing in endoplasmic reticulum
Gohir.A12G042000	A12	7583965	7584177	213	GhZFPH4_DAP-vs-GhZFPH4_neg_peak_4393	4.87726	8.13193	4.10855	7.38E-09	7.79E-05	Promoter (<=1kb)	7585047	7588805	3759	1	Gohir.A12G042000.1	-870	IPR026243	HAUS augmin-like complex subunit 1	-	-	GO:0051225,GO:0070652	spindle assembly|HAUS complex	-	-
Gohir.A12G069000	A12	21892116	21892231	116	GhZFPH4_DAP-vs-GhZFPH4_neg_peak_4432	4.87726	8.13193	4.10855	7.38E-09	7.79E-05	Distal Intergenic	21853641	21856720	3080	1	Gohir.A12G069000.3	38475	IPR027417	P-loop containing nucleoside triphosphate hydrolase	K03257	translation initiation factor 4A	-	-	ko01522,ko03013	Endocrine resistance|RNA transport
Gohir.A12G069900	A12	19994944	19995133	190	GhZFPH4_DAP-vs-GhZFPH4_neg_peak_4427	4.87726	8.13193	4.10855	7.38E-09	7.79E-05	Distal Intergenic	20137207	20141898	4692	1	Gohir.A12G069900.2	-142074	IPR000719,IPR011009	Protein kinase domain|Protein kinase-like domain superfamily	-	-	GO:0004672,GO:0005524,GO:0006468	protein kinase activity|ATP binding|protein phosphorylation	-	-
Gohir.A12G083000	A12	60549030	60549428	399	GhZFPH4_DAP-vs-GhZFPH4_neg_peak_4559	4.87726	8.13193	4.10855	7.38E-09	7.79E-05	Distal Intergenic	60406433	60408782	2350	1	Gohir.A12G083000.2	142597	IPR008979,IPR010325,IPR011013,IPR013784,IPR029411,IPR029413	Galactose-binding-like domain superfamily|Rhamnogalacturonate lyase|Galactose mutarotase-like domain superfamily|Carbohydrate-binding-like fold|Rhamnogalacturonan lyase, domain III|Rhamnogalacturonan lyase, domain II	K18195	rhamnogalacturonan endolyase [EC:4.2.2.23]	GO:0003824,GO:0005975,GO:0030246	catalytic activity|carbohydrate metabolic process|carbohydrate binding	ko01522	Endocrine resistance
Gohir.A12G091000	A12	67274783	67275020	238	GhZFPH4_DAP-vs-GhZFPH4_neg_peak_4584	4.87726	8.13193	4.10855	7.38E-09	7.79E-05	Distal Intergenic	67376611	67380444	3834	2	Gohir.A12G091000.1	105424	IPR015915	Kelch-type beta propeller	-	-	GO:0005515	protein binding	-	-
Gohir.A13G054100	A13	10705443	10705648	206	GhZFPH4_DAP-vs-GhZFPH4_neg_peak_4795	4.87726	8.13193	4.10855	7.38E-09	7.79E-05	Distal Intergenic	10619164	10623405	4242	2	Gohir.A13G054100.1	-82038	IPR001025,IPR008395,IPR043151	Bromo adjacent homology (BAH) domain|Agenet-like domain|Bromo adjacent homology (BAH) domain superfamily	-	-	GO:0003682	chromatin binding	-	-
Gohir.A13G074300	A13	20326178	20326432	255	GhZFPH4_DAP-vs-GhZFPH4_neg_peak_4823	4.87726	8.13193	4.10855	7.38E-09	7.79E-05	Distal Intergenic	20205754	20207255	1502	1	Gohir.A13G074300.2	120424	IPR003441,IPR036093	NAC domain|NAC domain superfamily	-	-	GO:0003677,GO:0006355	DNA binding|regulation of transcription, DNA-templated	-	-
Gohir.A13G084300	A13	28488024	28488284	261	GhZFPH4_DAP-vs-GhZFPH4_neg_peak_4849	4.87726	8.13193	4.10855	7.38E-09	7.79E-05	Distal Intergenic	28496970	28501724	4755	1	Gohir.A13G084300.1	-8686	IPR004333,IPR036893	SBP domain|SBP domain superfamily	-	-	GO:0003677,GO:0005634,GO:0042025	DNA binding|nucleus|host cell nucleus	-	-
Gohir.D01G127100	D01	32488312	32488477	166	GhZFPH4_DAP-vs-GhZFPH4_neg_peak_5297	4.87726	8.13193	4.10855	7.38E-09	7.79E-05	Distal Intergenic	32482122	32483152	1031	2	Gohir.D01G127100.1	-5160	IPR006459,IPR006702	Casparian strip membrane protein|Casparian strip membrane protein domain	-	-	-	-	-	-
Gohir.D01G159600	D01	55495145	55495297	153	GhZFPH4_DAP-vs-GhZFPH4_neg_peak_5373	4.87726	8.13193	4.10855	7.38E-09	7.79E-05	Promoter (2-3kb)	55495931	55497537	1607	2	Gohir.D01G159600.1	2240	IPR006121,IPR036163	Heavy metal-associated domain, HMA|Heavy metal-associated domain superfamily	-	-	GO:0030001,GO:0046872	metal ion transport|metal ion binding	-	-
Gohir.D01G177600	D01	59471849	59472086	238	GhZFPH4_DAP-vs-GhZFPH4_neg_peak_5384	4.87726	8.13193	4.10855	7.38E-09	7.79E-05	Distal Intergenic	59459099	59460083	985	2	Gohir.D01G177600.1	-11766	IPR008480	Protein of unknown function DUF761, plant	-	-	-	-	-	-
Gohir.D02G091100	D02	18901651	18901786	136	GhZFPH4_DAP-vs-GhZFPH4_neg_peak_5460	4.87726	8.13193	4.10855	7.38E-09	7.79E-05	Promoter (2-3kb)	18898854	18900221	1368	1	Gohir.D02G091100.1	2797	-	-	K09419	heat shock transcription factor, other eukaryote	-	-	ko01522	Endocrine resistance
Gohir.D02G209200	D02	69760087	69760410	324	GhZFPH4_DAP-vs-GhZFPH4_neg_peak_5673	4.87726	8.13193	4.10855	7.38E-09	7.79E-05	Promoter (<=1kb)	69758933	69761293	2361	2	Gohir.D02G209200.1	883	-	-	-	-	-	-	ko01522,ko04621,ko05132,ko05418	Endocrine resistance|NOD-like receptor signaling pathway|Salmonella infection|Fluid shear stress and atherosclerosis
Gohir.D03G093700	D03	38189920	38190161	242	GhZFPH4_DAP-vs-GhZFPH4_neg_peak_5817	4.87726	8.13193	4.10855	7.38E-09	7.79E-05	Distal Intergenic	38210155	38210859	705	2	Gohir.D03G093700.1	20698	-	-	-	-	-	-	-	-
Gohir.D03G130200	D03	48056884	48057113	230	GhZFPH4_DAP-vs-GhZFPH4_neg_peak_5844	4.87726	8.13193	4.10855	7.38E-09	7.79E-05	Promoter (<=1kb)	48055277	48057962	2686	2	Gohir.D03G130200.3	849	IPR000422,IPR000926,IPR016299,IPR017945,IPR032677,IPR036144	3,4-dihydroxy-2-butanone 4-phosphate synthase, RibB|GTP cyclohydrolase II, RibA|Riboflavin biosynthesis protein RibBA|DHBP synthase RibB-like alpha/beta domain superfamily|GTP cyclohydrolase II|RibA-like superfamily	K14652	3,4-dihydroxy 2-butanone 4-phosphate synthase / GTP cyclohydrolase II [EC:4.1.99.12 3.5.4.25]	GO:0003935,GO:0008686,GO:0009231	GTP cyclohydrolase II activity|3,4-dihydroxy-2-butanone-4-phosphate synthase activity|riboflavin biosynthetic process	ko00740,ko00790	Riboflavin metabolism|Folate biosynthesis
Gohir.D05G117100	D05	9972150	9972318	169	GhZFPH4_DAP-vs-GhZFPH4_neg_peak_6097	4.87726	8.13193	4.10855	7.38E-09	7.79E-05	3' UTR	9973953	9975839	1887	2	Gohir.D05G117100.1	3521	-	-	-	-	-	-	-	-
Gohir.D06G043800	D06	6314161	6314346	186	GhZFPH4_DAP-vs-GhZFPH4_neg_peak_6281	4.87726	8.13193	4.10855	7.38E-09	7.79E-05	Distal Intergenic	6301352	6302485	1134	2	Gohir.D06G043800.1	-11676	IPR001471,IPR016177,IPR036955	AP2/ERF domain|DNA-binding domain superfamily|AP2/ERF domain superfamily	-	-	GO:0003677,GO:0003700,GO:0006355	DNA binding|DNA-binding transcription factor activity|regulation of transcription, DNA-templated	-	-
Gohir.D06G110500	D06	27872923	27873128	206	GhZFPH4_DAP-vs-GhZFPH4_neg_peak_6379	4.87726	8.13193	4.10855	7.38E-09	7.79E-05	Distal Intergenic	27850297	27853314	3018	2	Gohir.D06G110500.1	-19609	IPR000217,IPR002452,IPR003008,IPR008280,IPR018316,IPR023123,IPR036525,IPR037103	Tubulin|Alpha tubulin|Tubulin/FtsZ, GTPase domain|Tubulin/FtsZ, C-terminal|Tubulin/FtsZ, 2-layer sandwich domain|Tubulin, C-terminal|Tubulin/FtsZ, GTPase domain superfamily|Tubulin/FtsZ, C-terminal domain superfamily	K07374	tubulin alpha	GO:0003924,GO:0005200,GO:0005525,GO:0005874,GO:0007017	GTPase activity|structural constituent of cytoskeleton|GTP binding|microtubule|microtubule-based process	ko01522,ko04145,ko04210,ko04530,ko04540,ko05130	Endocrine resistance|Phagosome|Apoptosis|Tight junction|Gap junction|Pathogenic Escherichia coli infection
Gohir.D06G134300	D06	46995925	46996129	205	GhZFPH4_DAP-vs-GhZFPH4_neg_peak_6434	4.87726	8.13193	4.10855	7.38E-09	7.79E-05	Distal Intergenic	46983378	46985306	1929	1	Gohir.D06G134300.1	12547	IPR039261	Ferredoxin-NADP reductase (FNR), nucleotide-binding domain	-	-	-	-	-	-
Gohir.D07G009500	D07	1087057	1087195	139	GhZFPH4_DAP-vs-GhZFPH4_neg_peak_6491	4.87726	8.13193	4.10855	7.38E-09	7.79E-05	Promoter (<=1kb)	1084557	1086909	2353	2	Gohir.D07G009500.2	-148	IPR000719,IPR011009	Protein kinase domain|Protein kinase-like domain superfamily	K04368	mitogen-activated protein kinase kinase 1 [EC:2.7.12.2]	GO:0004672,GO:0005524,GO:0006468	protein kinase activity|ATP binding|protein phosphorylation	ko01521,ko01522,ko04010,ko04012,ko04013,ko04014,ko04015,ko04022,ko04024,ko04062,ko04066,ko04068,ko04071,ko04072,ko04114,ko04140,ko04150,ko04151,ko04210,ko04218,ko04320,ko04370,ko04371,ko04380,ko04510,ko04540,ko04550,ko04620,ko04626,ko04650,ko04660,ko04662,ko04664,ko04666,ko04668,ko04720,ko04722,ko04725,ko04726,ko04730,ko04810,ko04910,ko04912,ko04914,ko04915,ko04916,ko04917,ko04919,ko04921,ko04926…	EGFR tyrosine kinase inhibitor resistance|Endocrine resistance|MAPK signaling pathway|ErbB signaling pathway|MAPK signaling pathway - fly|Ras signaling pathway|Rap1 signaling pathway|cGMP-PKG signaling pathway|cAMP signaling pathway|Chemokine signaling pathway|HIF-1 signaling pathway|FoxO signaling pathway|Sphingolipid signaling pathway|Phospholipase D signaling pathway|Oocyte meiosis|Autophagy -…
Gohir.D07G071500	D07	8265900	8266084	185	GhZFPH4_DAP-vs-GhZFPH4_neg_peak_6506	4.87726	8.13193	4.10855	7.38E-09	7.79E-05	Distal Intergenic	8255416	8256678	1263	1	Gohir.D07G071500.2	10484	IPR003388	Reticulon	-	-	-	-	-	-
Gohir.D07G146901	D07	24186842	24187042	201	GhZFPH4_DAP-vs-GhZFPH4_neg_peak_6547	4.87726	8.13193	4.10855	7.38E-09	7.79E-05	Distal Intergenic	24177427	24178947	1521	2	Gohir.D07G146901.1	-7895	IPR004971,IPR039753	mRNA (guanine-N(7))-methyltransferase domain|mRNA cap guanine-N7 methyltransferase	-	-	GO:0004482	mRNA (guanine-N7-)-methyltransferase activity	-	-
Gohir.D07G165200	D07	31829111	31829367	257	GhZFPH4_DAP-vs-GhZFPH4_neg_peak_6610	4.87726	8.13193	4.10855	7.38E-09	7.79E-05	Promoter (2-3kb)	31831735	31832220	486	1	Gohir.D07G165200.1	-2368	IPR008801	Rapid ALkalinization Factor	-	-	-	-	-	-
Gohir.D07G170966	D07	35132283	35132466	184	GhZFPH4_DAP-vs-GhZFPH4_neg_peak_6623	4.87726	8.13193	4.10855	7.38E-09	7.79E-05	Distal Intergenic	35085182	35090885	5704	1	Gohir.D07G170966.1	47101	-	-	-	-	-	-	-	-
Gohir.D09G159600	D09	46515771	46515918	148	GhZFPH4_DAP-vs-GhZFPH4_neg_peak_7127	4.87726	8.13193	4.10855	7.38E-09	7.79E-05	Promoter (<=1kb)	46514588	46516299	1712	2	Gohir.D09G159600.1	381	IPR000425,IPR023271,IPR034294	Major intrinsic protein|Aquaporin-like|Aquaporin transporter	-	-	GO:0015267,GO:0016020,GO:0055085	channel activity|membrane|transmembrane transport	ko01522	Endocrine resistance
Gohir.D10G238500	D10	66155836	66156053	218	GhZFPH4_DAP-vs-GhZFPH4_neg_peak_7343	4.87726	8.13193	4.10855	7.38E-09	7.79E-05	Promoter (1-2kb)	66154697	66157897	3201	1	Gohir.D10G238500.1	1139	-	-	-	-	-	-	-	-
Gohir.D11G230900	D11	47232793	47232947	155	GhZFPH4_DAP-vs-GhZFPH4_neg_peak_7497	4.87726	8.13193	4.10855	7.38E-09	7.79E-05	Distal Intergenic	47189474	47194141	4668	2	Gohir.D11G230900.1	-38652	-	-	-	-	GO:0004650,GO:0005975	polygalacturonase activity|carbohydrate metabolic process	-	-
Gohir.D11G262650	D11	58565984	58566245	262	GhZFPH4_DAP-vs-GhZFPH4_neg_peak_7536	4.87726	8.13193	4.10855	7.38E-09	7.79E-05	Distal Intergenic	58570121	58570592	472	1	Gohir.D11G262650.1	-3876	-	-	-	-	-	-	-	-
Gohir.D12G052200	D12	8658420	8658777	358	GhZFPH4_DAP-vs-GhZFPH4_neg_peak_7608	4.87726	8.13193	4.10855	7.38E-09	7.79E-05	Promoter (2-3kb)	8656384	8660997	4614	1	Gohir.D12G052200.1	2036	-	-	K01809	mannose-6-phosphate isomerase [EC:5.3.1.8]	-	-	ko00051,ko00520	Fructose and mannose metabolism|Amino sugar and nucleotide sugar metabolism
Gohir.D12G086600	D12	15818784	15819392	609	GhZFPH4_DAP-vs-GhZFPH4_neg_peak_7623	4.87726	8.13193	4.10855	7.38E-09	7.79E-05	5' UTR	15802790	15821628	18839	1	Gohir.D12G086600.2	15994	-	-	-	-	-	-	-	-
Gohir.D12G089800	D12	13408425	13408648	224	GhZFPH4_DAP-vs-GhZFPH4_neg_peak_7620	4.87726	8.13193	4.10855	7.38E-09	7.79E-05	Distal Intergenic	13420991	13425137	4147	2	Gohir.D12G089800.2	16489	-	-	-	-	-	-	-	-
Gohir.D12G136300	D12	44802482	44802678	197	GhZFPH4_DAP-vs-GhZFPH4_neg_peak_7725	4.87726	8.13193	4.10855	7.38E-09	7.79E-05	Promoter (1-2kb)	44801011	44803804	2794	1	Gohir.D12G136300.1	1471	-	-	-	-	-	-	-	-
Gohir.D13G113100	D13	38672576	38672897	322	GhZFPH4_DAP-vs-GhZFPH4_neg_peak_7898	4.87726	8.13193	4.10855	7.38E-09	7.79E-05	Promoter (1-2kb)	38671947	38673997	2051	2	Gohir.D13G113100.1	1100	-	-	-	-	GO:0005515	protein binding	-	-
Gohir.D13G144900	D13	50662944	50663208	265	GhZFPH4_DAP-vs-GhZFPH4_neg_peak_7940	4.87726	8.13193	4.10855	7.38E-09	7.79E-05	Distal Intergenic	50641112	50642792	1681	2	Gohir.D13G144900.1	-20152	-	-	-	-	GO:0004190,GO:0006508	aspartic-type endopeptidase activity|proteolysis	-	-
Gohir.D13G183400	D13	58413484	58413800	317	GhZFPH4_DAP-vs-GhZFPH4_neg_peak_7961	4.87726	8.13193	4.10855	7.38E-09	7.79E-05	Distal Intergenic	58402306	58405076	2771	2	Gohir.D13G183400.1	-8408	-	-	-	-	GO:0016020,GO:0016021,GO:0022857	membrane|integral component of membrane|transmembrane transporter activity	-	-
Gohir.A03G097101	A03	55800648	55800820	173	GhZFPH4_DAP-vs-GhZFPH4_neg_peak_1029	4.87611	8.05753	4.04169	8.76E-09	9.08E-05	Distal Intergenic	56116939	56119290	2352	1	Gohir.A03G097101.1	-316119	IPR005061,IPR042277	Vacuolar protein sorting-associated protein Ist1|Vacuolar protein sorting-associated protein IST1-like	-	-	GO:0015031	protein transport	ko04144	Endocytosis
Gohir.D09G108900	D09	40098124	40098405	282	GhZFPH4_DAP-vs-GhZFPH4_neg_peak_7110	4.86941	8.11847	4.09806	7.61E-09	7.98E-05	Promoter (1-2kb)	40094691	40096895	2205	2	Gohir.D09G108900.1	-1229	IPR002885,IPR011990	Pentatricopeptide repeat|Tetratricopeptide-like helical domain superfamily	-	-	GO:0005515	protein binding	-	-
Gohir.A01G140394	A01	61228650	61228833	184	GhZFPH4_DAP-vs-GhZFPH4_neg_peak_210	4.86537	8.49541	4.44897	3.20E-09	3.56E-05	Distal Intergenic	61189110	61189400	291	2	Gohir.A01G140394.1	-39250	IPR000589,IPR005290,IPR009068	Ribosomal protein S15|Ribosomal protein S15, bacterial-type|S15/NS1, RNA-binding	K02956	small subunit ribosomal protein S15	GO:0003735,GO:0005840,GO:0006412	structural constituent of ribosome|ribosome|translation	ko01522,ko03010	Endocrine resistance|Ribosome
Gohir.A06G158900	A06	119836508	119836665	158	GhZFPH4_DAP-vs-GhZFPH4_neg_peak_2358	4.85851	8.41907	4.37739	3.81E-09	4.19E-05	Promoter (1-2kb)	119838343	119841799	3457	1	Gohir.A06G158900.1	-1678	IPR002885,IPR011990,IPR033443	Pentatricopeptide repeat|Tetratricopeptide-like helical domain superfamily|Pentacotripeptide-repeat region of PRORP	-	-	GO:0005515	protein binding	-	-
Gohir.A12G189700	A12	99863531	99863761	231	GhZFPH4_DAP-vs-GhZFPH4_neg_peak_4717	4.85344	8.09105	4.07267	8.11E-09	8.46E-05	Distal Intergenic	99848179	99850828	2650	2	Gohir.A12G189700.1	-12703	IPR002125,IPR015517,IPR016193	Cytidine and deoxycytidylate deaminase domain|Deoxycytidylate deaminase-related|Cytidine deaminase-like	K01493	dCMP deaminase [EC:3.5.4.12]	GO:0003824	catalytic activity	ko00240,ko01522	Pyrimidine metabolism|Endocrine resistance
Gohir.D02G109932	D02	30344665	30344858	194	GhZFPH4_DAP-vs-GhZFPH4_neg_peak_5504	4.85344	8.09105	4.07267	8.11E-09	8.46E-05	Promoter (<=1kb)	30345247	30345787	541	1	Gohir.D02G109932.1	-389	-	-	-	-	-	-	-	-
Gohir.D04G087100	D04	21757702	21757968	267	GhZFPH4_DAP-vs-GhZFPH4_neg_peak_5923	4.85344	8.09105	4.07267	8.11E-09	8.46E-05	Distal Intergenic	21795401	21798249	2849	1	Gohir.D04G087100.1	-37433	IPR001440,IPR011990,IPR013026,IPR013105,IPR019734	Tetratricopeptide repeat 1|Tetratricopeptide-like helical domain superfamily|Tetratricopeptide repeat-containing domain|Tetratricopeptide repeat 2|Tetratricopeptide repeat	-	-	GO:0005515	protein binding	-	-
Gohir.A10G073900	A10	11751777	11751999	223	GhZFPH4_DAP-vs-GhZFPH4_neg_peak_3610	4.8503	8.4686	4.42353	3.40E-09	3.77E-05	Distal Intergenic	11745586	11747319	1734	2	Gohir.A10G073900.1	-4458	-	-	-	-	-	-	-	-
Gohir.A01G152000	A01	91508387	91508608	222	GhZFPH4_DAP-vs-GhZFPH4_neg_peak_337	4.83756	8.06378	4.04759	8.63E-09	8.96E-05	Distal Intergenic	91108127	91111236	3110	1	Gohir.A01G152000.2	400260	IPR004776,IPR014024	Membrane transport protein|Auxin efflux carrier, plant type	-	-	GO:0016021,GO:0055085	integral component of membrane|transmembrane transport	ko01522	Endocrine resistance
Gohir.A02G088801	A02	39278963	39279098	136	GhZFPH4_DAP-vs-GhZFPH4_neg_peak_577	4.83756	8.06378	4.04759	8.63E-09	8.96E-05	Distal Intergenic	39417447	39418635	1189	2	Gohir.A02G088801.1	139537	-	-	-	-	-	-	-	-
Gohir.D11G200500	D11	25331373	25331733	361	GhZFPH4_DAP-vs-GhZFPH4_neg_peak_7415	4.83756	8.06378	4.04759	8.63E-09	8.96E-05	Distal Intergenic	25293665	25297086	3422	2	Gohir.D11G200500.2	-34287	-	-	-	-	GO:0046983	protein dimerization activity	-	-
Gohir.A05G309350	A05	48597031	48597281	251	GhZFPH4_DAP-vs-GhZFPH4_neg_peak_1733	4.83532	8.44193	4.39864	3.61E-09	3.99E-05	Distal Intergenic	48582330	48582650	321	1	Gohir.A05G309350.1	14701	IPR001810,IPR036047	F-box domain|F-box-like domain superfamily	-	-	GO:0005515	protein binding	-	-
Gohir.D09G059250	D09	31062938	31063153	216	GhZFPH4_DAP-vs-GhZFPH4_neg_peak_7085	4.82582	20.8853	16.317	1.30E-21	4.82E-17	Distal Intergenic	31055318	31055680	363	2	Gohir.D09G059250.1	-7258	IPR018848,IPR043017	WIYLD domain|WIYLD domain superfamily	-	-	GO:0018024	histone-lysine N-methyltransferase activity	-	-
Gohir.D11G247100	D11	53512617	53512828	212	GhZFPH4_DAP-vs-GhZFPH4_neg_peak_7522	4.8218	8.03667	4.0222	9.19E-09	9.50E-05	Downstream (<1kb)	53513496	53520133	6638	2	Gohir.D11G247100.3	7305	-	-	-	-	-	-	-	-
Gohir.A06G119300	A06	64940306	64940639	334	GhZFPH4_DAP-vs-GhZFPH4_neg_peak_2162	4.80613	8.0097	3.99736	9.78E-09	0.00010061	Distal Intergenic	64934321	64940260	5940	1	Gohir.A06G119300.1	5985	IPR005101,IPR006050,IPR014729,IPR036134,IPR036155	Cryptochrome/DNA photolyase, FAD-binding domain|DNA photolyase, N-terminal|Rossmann-like alpha/beta/alpha sandwich fold|Cryptochrome/DNA photolyase, FAD-binding domain-like superfamily|Cryptochrome/photolyase, N-terminal domain superfamily	-	-	-	-	ko01522,ko04710	Endocrine resistance|Circadian rhythm
Gohir.A07G180100	A07	82882624	82882791	168	GhZFPH4_DAP-vs-GhZFPH4_neg_peak_2654	4.80613	8.0097	3.99736	9.78E-09	0.00010061	Distal Intergenic	82878928	82880181	1254	1	Gohir.A07G180100.1	3696	IPR005202	Transcription factor GRAS	-	-	-	-	-	-
Gohir.A10G131800	A10	74443186	74443375	190	GhZFPH4_DAP-vs-GhZFPH4_neg_peak_3843	4.80613	8.0097	3.99736	9.78E-09	0.00010061	Distal Intergenic	74494300	74508487	14188	1	Gohir.A10G131800.1	-50925	IPR000380,IPR006171,IPR013497,IPR013824,IPR013825,IPR013826,IPR023405,IPR025724	DNA topoisomerase, type IA|TOPRIM domain|DNA topoisomerase, type IA, central|DNA topoisomerase, type IA, central region, subdomain 1|DNA topoisomerase, type IA, central region, subdomain 2|DNA topoisomerase, type IA, central region, subdomain 3|DNA topoisomerase, type IA, core domain|GAG-pre-integrase domain	K03165	DNA topoisomerase III [EC:5.6.2.1]	GO:0003677,GO:0003916,GO:0003917,GO:0006265	DNA binding|DNA topoisomerase activity|DNA topoisomerase type I (single strand cut, ATP-independent) activity|DNA topological change	ko01522,ko03440,ko03460	Endocrine resistance|Homologous recombination|Fanconi anemia pathway
Gohir.A10G161800	A10	94360346	94360608	263	GhZFPH4_DAP-vs-GhZFPH4_neg_peak_3916	4.80613	8.0097	3.99736	9.78E-09	0.00010061	Distal Intergenic	94286963	94291377	4415	2	Gohir.A10G161800.1	-68969	IPR002048,IPR011992,IPR039865	EF-hand domain|EF-hand domain pair|Serine/threonine-protein phosphatase 2A regulatory subunit B'' subunit gamma	K11583	serine/threonine-protein phosphatase 2A regulatory subunit B''	GO:0005509,GO:0035303	calcium ion binding|regulation of dephosphorylation	ko01522,ko03015,ko04071,ko04151,ko04152,ko04261,ko04728	Endocrine resistance|mRNA surveillance pathway|Sphingolipid signaling pathway|PI3K-Akt signaling pathway|AMPK signaling pathway|Adrenergic signaling in cardiomyocytes|Dopaminergic synapse
Gohir.A12G083100	A12	59996433	59996588	156	GhZFPH4_DAP-vs-GhZFPH4_neg_peak_4558	4.80613	8.0097	3.99736	9.78E-09	0.00010061	Distal Intergenic	59944602	59972884	28283	2	Gohir.A12G083100.1	-23549	IPR028103,IPR028107	Spatacsin|Spatacsin, C-terminal domain	-	-	-	-	ko01522	Endocrine resistance
Gohir.A13G156800	A13	100304445	100304633	189	GhZFPH4_DAP-vs-GhZFPH4_neg_peak_5106	4.80613	8.0097	3.99736	9.78E-09	0.00010061	Promoter (2-3kb)	100298677	100307330	8654	2	Gohir.A13G156800.1	2697	IPR001680,IPR013934,IPR015943,IPR017986,IPR020472,IPR036322,IPR011047	WD40 repeat|Small-subunit processome, Utp13|WD40/YVTN repeat-like-containing domain superfamily|WD40-repeat-containing domain|G-protein beta WD-40 repeat|WD40-repeat-containing domain superfamily|Quinoprotein alcohol dehydrogenase-like superfamily	-	-	GO:0005515,GO:0006364,GO:0032040	protein binding|rRNA processing|small-subunit processome	ko01522,ko03008	Endocrine resistance|Ribosome biogenesis in eukaryotes
Gohir.D08G165400	D08	53648920	53649063	144	GhZFPH4_DAP-vs-GhZFPH4_neg_peak_6947	4.80613	8.0097	3.99736	9.78E-09	0.00010061	Exon (Gohir.D08G165400.2/Gohir.D08G165400, exon 12 of 13)	53648432	53652183	3752	2	Gohir.D08G165400.2	3120	IPR002528	Multi antimicrobial extrusion protein	-	-	GO:0015297,GO:0016020,GO:0042910,GO:0055085	antiporter activity|membrane|xenobiotic transmembrane transporter activity|transmembrane transport	-	-
Gohir.A02G123602	A02	90735696	90735845	150	GhZFPH4_DAP-vs-GhZFPH4_neg_peak_756	4.79057	7.98287	3.97233	1.04E-08	0.000106579	Distal Intergenic	90439495	90455818	16324	1	Gohir.A02G123602.4	296201	-	-	K01142	exodeoxyribonuclease III [EC:3.1.11.2]	-	-	ko01522,ko03410	Endocrine resistance|Base excision repair
Gohir.D06G130600	D06	44746111	44746257	147	GhZFPH4_DAP-vs-GhZFPH4_neg_peak_6427	4.79057	7.98287	3.97233	1.04E-08	0.000106579	Distal Intergenic	44709218	44715560	6343	2	Gohir.D06G130600.1	-30551	IPR011989,IPR016024,IPR022771,IPR039874	Armadillo-like helical|Armadillo-type fold|Wings apart-like protein, C-terminal|Wings apart-like protein	-	-	-	-	-	-
Gohir.D08G115150	D08	37762185	37762306	122	GhZFPH4_DAP-vs-GhZFPH4_neg_peak_6868	4.79057	7.98287	3.97233	1.04E-08	0.000106579	Promoter (1-2kb)	37763659	37764294	636	2	Gohir.D08G115150.1	1988	-	-	-	-	-	-	-	-
Gohir.D09G180800	D09	48753188	48753542	355	GhZFPH4_DAP-vs-GhZFPH4_neg_peak_7135	4.79057	7.98287	3.97233	1.04E-08	0.000106579	Exon (Gohir.D09G180800.3/Gohir.D09G180800, exon 5 of 5)	48749167	48754116	4950	1	Gohir.D09G180800.3	4021	IPR013244	Sec39 domain	K20473	neuroblastoma-amplified sequence	GO:0006890	retrograde vesicle-mediated transport, Golgi to endoplasmic reticulum	ko01522	Endocrine resistance
Gohir.A09G020000	A09	6386507	6386914	408	GhZFPH4_DAP-vs-GhZFPH4_neg_peak_3169	4.79046	10.2238	6.07623	5.97E-11	8.39E-07	Distal Intergenic	6375647	6377719	2073	1	Gohir.A09G020000.1	10860	IPR008183,IPR011013,IPR014718,IPR015443	Aldose 1-/Glucose-6-phosphate 1-epimerase|Galactose mutarotase-like domain superfamily|Glycoside hydrolase-type carbohydrate-binding|Aldose 1-epimerase	K01785	aldose 1-epimerase [EC:5.1.3.3]	GO:0003824,GO:0005975,GO:0016853,GO:0019318,GO:0030246	catalytic activity|carbohydrate metabolic process|isomerase activity|hexose metabolic process|carbohydrate binding	ko00010,ko00052	Glycolysis / Gluconeogenesis|Galactose metabolism
Gohir.D01G099801	D01	36219029	36219178	150	GhZFPH4_DAP-vs-GhZFPH4_neg_peak_5311	4.79046	10.2238	6.07623	5.97E-11	8.39E-07	Distal Intergenic	36766429	36768733	2305	2	Gohir.D01G099801.1	549555	IPR004873	BURP domain	-	-	-	-	-	-
Gohir.A03G171875	A03	108830594	108830875	282	GhZFPH4_DAP-vs-GhZFPH4_neg_peak_1207	4.78007	9.05137	4.96899	8.88E-10	1.07E-05	Distal Intergenic	108842165	108843333	1169	1	Gohir.A03G171875.1	-11290	-	-	-	-	-	-	-	-
Gohir.A08G100500	A08	64683420	64683568	149	GhZFPH4_DAP-vs-GhZFPH4_neg_peak_2955	4.77632	8.33659	4.30027	4.61E-09	5.01E-05	Distal Intergenic	64724758	64727367	2610	1	Gohir.A08G100500.2	-41190	IPR019395	Transmembrane protein 161A/B	-	-	-	-	-	-
Gohir.A12G078522	A12	70153589	70153744	156	GhZFPH4_DAP-vs-GhZFPH4_neg_peak_4601	4.77632	8.33659	4.30027	4.61E-09	5.01E-05	Distal Intergenic	70224184	70227758	3575	1	Gohir.A12G078522.1	-70440	IPR002347,IPR036291	Short-chain dehydrogenase/reductase SDR|NAD(P)-binding domain superfamily	-	-	-	-	-	-
Gohir.A12G083500	A12	46201773	46201889	117	GhZFPH4_DAP-vs-GhZFPH4_neg_peak_4517	4.77632	8.33659	4.30027	4.61E-09	5.01E-05	Distal Intergenic	46014510	46016750	2241	1	Gohir.A12G083500.1	187263	IPR004575,IPR015877	Cdk-activating kinase assembly factor MAT1/Tfb3|Cdk-activating kinase assembly factor MAT1, centre	K10842	CDK-activating kinase assembly factor MAT1	GO:0005675,GO:0006289,GO:0045737,GO:0061575	transcription factor TFIIH holo complex|nucleotide-excision repair|positive regulation of cyclin-dependent protein serine/threonine kinase activity|cyclin-dependent protein serine/threonine kinase activator activity	ko01522,ko03022,ko03420	Endocrine resistance|Basal transcription factors|Nucleotide excision repair
Gohir.D01G059800	D01	9325246	9325428	183	GhZFPH4_DAP-vs-GhZFPH4_neg_peak_5159	4.77632	8.33659	4.30027	4.61E-09	5.01E-05	Distal Intergenic	9330510	9334648	4139	2	Gohir.D01G059800.1	9220	IPR003231,IPR009081,IPR036736	Acyl carrier protein (ACP)|Phosphopantetheine binding ACP domain|ACP-like superfamily	-	-	GO:0006633	fatty acid biosynthetic process	ko00061,ko00190,ko04714,ko04723	Fatty acid biosynthesis|Oxidative phosphorylation|Thermogenesis|Retrograde endocannabinoid signaling
Gohir.D01G063932	D01	9893859	9894015	157	GhZFPH4_DAP-vs-GhZFPH4_neg_peak_5163	4.77632	8.33659	4.30027	4.61E-09	5.01E-05	Distal Intergenic	9920191	9921613	1423	1	Gohir.D01G063932.1	-26176	IPR002913,IPR042160	START domain|Homeobox-leucine zipper protein GLABRA2/ANL2/PDF2/ATML1-like	-	-	GO:0008289	lipid binding	-	-
Gohir.D05G331800	D05	53403935	53404160	226	GhZFPH4_DAP-vs-GhZFPH4_neg_peak_6221	4.77632	8.33659	4.30027	4.61E-09	5.01E-05	Distal Intergenic	53408437	53411092	2656	2	Gohir.D05G331800.1	6932	-	-	-	-	-	-	-	-
Gohir.A08G081062	A08	26555732	26555905	174	GhZFPH4_DAP-vs-GhZFPH4_neg_peak_2830	4.77511	7.9562	3.94738	1.11E-08	0.000112881	Distal Intergenic	26415239	26418339	3101	1	Gohir.A08G081062.2	140493	IPR004971,IPR029063,IPR039753	mRNA (guanine-N(7))-methyltransferase domain|S-adenosyl-L-methionine-dependent methyltransferase|mRNA cap guanine-N7 methyltransferase	-	-	GO:0004482	mRNA (guanine-N7-)-methyltransferase activity	-	-
Gohir.D12G094900	D12	35448076	35448252	177	GhZFPH4_DAP-vs-GhZFPH4_neg_peak_7692	4.77511	7.9562	3.94738	1.11E-08	0.000112881	Distal Intergenic	35398749	35399406	658	2	Gohir.D12G094900.1	-48670	-	-	K02908	large subunit ribosomal protein L30e	-	-	ko01522,ko03010	Endocrine resistance|Ribosome
Gohir.D08G181700	D08	57078555	57078777	223	GhZFPH4_DAP-vs-GhZFPH4_neg_peak_6956	4.76179	8.31059	4.27609	4.89E-09	5.30E-05	Exon (Gohir.D08G181600.2/Gohir.D08G181600, exon 50 of 53)	57080625	57083514	2890	2	Gohir.D08G181700.1	4737	IPR000719,IPR001245,IPR011009	Protein kinase domain|Serine-threonine/tyrosine-protein kinase, catalytic domain|Protein kinase-like domain superfamily	-	-	GO:0004672,GO:0005524,GO:0006468	protein kinase activity|ATP binding|protein phosphorylation	-	-
Gohir.A02G009400	A02	802741	802874	134	GhZFPH4_DAP-vs-GhZFPH4_neg_peak_432	4.75974	7.92967	3.92261	1.18E-08	0.000119506	Distal Intergenic	808525	810135	1611	1	Gohir.A02G009400.1	-5651	-	-	-	-	-	-	-	-
Gohir.D09G004700	D09	1295888	1296037	150	GhZFPH4_DAP-vs-GhZFPH4_neg_peak_6988	4.75974	7.92967	3.92261	1.18E-08	0.000119506	Intron (Gohir.D09G004800.1/Gohir.D09G004800, intron 10 of 11)	1283067	1286521	3455	2	Gohir.D09G004700.3	-9367	IPR003173,IPR009044	Transcriptional coactivator p15 (PC4)|ssDNA-binding transcriptional regulator	-	-	GO:0003677,GO:0006355	DNA binding|regulation of transcription, DNA-templated	-	-
Gohir.D13G102400	D13	33651898	33652039	142	GhZFPH4_DAP-vs-GhZFPH4_neg_peak_7880	4.75974	7.92967	3.92261	1.18E-08	0.000119506	Distal Intergenic	33639173	33639870	698	1	Gohir.D13G102400.1	12725	-	-	-	-	-	-	-	-
Gohir.A06G105700	A06	47120471	47120592	122	GhZFPH4_DAP-vs-GhZFPH4_neg_peak_2094	4.75964	9.78134	5.65722	1.65E-10	2.20E-06	Distal Intergenic	47290025	47290204	180	1	Gohir.A06G105700.1	-169433	-	-	-	-	-	-	-	-
Gohir.A11G237100	A11	98625611	98625863	253	GhZFPH4_DAP-vs-GhZFPH4_neg_peak_4294	4.74735	8.28472	4.25176	5.19E-09	5.60E-05	Distal Intergenic	98610537	98614269	3733	2	Gohir.A11G237100.2	-11342	IPR002300,IPR004493,IPR009008,IPR009080,IPR013155,IPR014729	Aminoacyl-tRNA synthetase, class Ia|Leucyl-tRNA synthetase, class Ia, archaeal/eukaryotic cytosolic|Valyl/Leucyl/Isoleucyl-tRNA synthetase, editing domain|Aminoacyl-tRNA synthetase, class Ia, anticodon-binding|Methionyl/Valyl/Leucyl/Isoleucyl-tRNA synthetase, anticodon-binding|Rossmann-like alpha/beta/alpha sandwich fold	K01869	leucyl-tRNA synthetase [EC:6.1.1.4]	GO:0000166,GO:0002161,GO:0004812,GO:0004823,GO:0005524,GO:0006418,GO:0006429	nucleotide binding|aminoacyl-tRNA editing activity|aminoacyl-tRNA ligase activity|leucine-tRNA ligase activity|ATP binding|tRNA aminoacylation for protein translation|leucyl-tRNA aminoacylation	ko00970,ko01522	Aminoacyl-tRNA biosynthesis|Endocrine resistance
Gohir.D08G089133	D08	14827876	14828026	151	GhZFPH4_DAP-vs-GhZFPH4_neg_peak_6743	4.733	8.25897	4.22751	5.51E-09	5.92E-05	Distal Intergenic	14806407	14806973	567	1	Gohir.D08G089133.1	21469	IPR001280,IPR036408	Photosystem I PsaA/PsaB|Photosystem I PsaA/PsaB superfamily	-	-	GO:0009579,GO:0015979,GO:0016021	thylakoid|photosynthesis|integral component of membrane	-	-
Gohir.D09G044333	D09	21331828	21332021	194	GhZFPH4_DAP-vs-GhZFPH4_neg_peak_7059	4.72642	8.18198	4.15592	6.58E-09	6.98E-05	Distal Intergenic	21517113	21517424	312	2	Gohir.D09G044333.1	185403	IPR005813,IPR035566	Ribosomal protein L20|Ribosomal protein L20, C-terminal	-	-	GO:0003735,GO:0005840,GO:0006412,GO:0019843	structural constituent of ribosome|ribosome|translation|rRNA binding	-	-
Gohir.A05G377600	A05	104342009	104342338	330	GhZFPH4_DAP-vs-GhZFPH4_neg_peak_1930	4.71424	7.85093	3.84905	1.41E-08	0.000141563	Distal Intergenic	104363451	104364606	1156	2	Gohir.A05G377600.1	22268	IPR000668,IPR013201,IPR038765	Peptidase C1A, papain C-terminal|Cathepsin propeptide inhibitor domain (I29)|Papain-like cysteine peptidase superfamily	-	-	GO:0006508,GO:0008234	proteolysis|cysteine-type peptidase activity	-	-
Gohir.A08G112900	A08	80436000	80436185	186	GhZFPH4_DAP-vs-GhZFPH4_neg_peak_2996	4.71424	7.85093	3.84905	1.41E-08	0.000141563	Distal Intergenic	80128371	80131085	2715	2	Gohir.A08G112900.4	-304915	IPR001849,IPR011993	Pleckstrin homology domain|PH-like domain superfamily	-	-	-	-	-	-
Gohir.A09G074750	A09	60809225	60809381	157	GhZFPH4_DAP-vs-GhZFPH4_neg_peak_3447	4.71424	7.85093	3.84905	1.41E-08	0.000141563	Distal Intergenic	60822431	60823814	1384	1	Gohir.A09G074750.1	-13050	IPR011016,IPR013083	Zinc finger, RING-CH-type|Zinc finger, RING/FYVE/PHD-type	-	-	GO:0008270	zinc ion binding	-	-
Gohir.D13G167600	D13	56268915	56269133	219	GhZFPH4_DAP-vs-GhZFPH4_neg_peak_7956	4.71424	7.85093	3.84905	1.41E-08	0.000141563	Distal Intergenic	56256954	56265301	8348	1	Gohir.D13G167600.1	11961	-	-	K13066	caffeic acid 3-O-methyltransferase [EC:2.1.1.68]	GO:0008171,GO:0046983	O-methyltransferase activity|protein dimerization activity	ko00940	Phenylpropanoid biosynthesis
Gohir.A01G148500	A01	84064278	84064416	139	GhZFPH4_DAP-vs-GhZFPH4_neg_peak_310	4.70456	8.20786	4.17969	6.20E-09	6.61E-05	Distal Intergenic	84033369	84040013	6645	1	Gohir.A01G148500.5	30909	-	-	-	-	-	-	-	-
Gohir.A13G078500	A13	24511813	24511978	166	GhZFPH4_DAP-vs-GhZFPH4_neg_peak_4834	4.69593	7.74628	3.75152	1.79E-08	0.000177207	Distal Intergenic	24366729	24372333	5605	2	Gohir.A13G078500.3	-139480	IPR001594	Palmitoyltransferase, DHHC domain	K20027	palmitoyltransferase ZDHHC1/11 [EC:2.3.1.225]	GO:0016409	palmitoyltransferase activity	ko01522	Endocrine resistance
Gohir.D12G210100	D12	56563469	56564070	602	GhZFPH4_DAP-vs-GhZFPH4_neg_peak_7752	4.69593	7.74628	3.75152	1.79E-08	0.000177207	Distal Intergenic	56552779	56553714	936	1	Gohir.D12G210100.1	10690	-	-	-	-	-	-	-	-
Gohir.A03G056250	A03	13374578	13374729	152	GhZFPH4_DAP-vs-GhZFPH4_neg_peak_868	4.68439	7.79914	3.80034	1.59E-08	0.000158365	Promoter (2-3kb)	13377088	13381305	4218	1	Gohir.A03G056250.1	-2359	IPR000602,IPR011330,IPR027291,IPR028995,IPR037094	Glycoside hydrolase family 38, N-terminal domain|Glycoside hydrolase/deacetylase, beta/alpha-barrel|Glycoside hydrolase 38, N-terminal domain superfamily|Glycoside hydrolase families 57/38, central domain superfamily|Glycoside hydrolase family 38, central domain superfamily	-	-	GO:0003824,GO:0004559,GO:0005975,GO:0006013	catalytic activity|alpha-mannosidase activity|carbohydrate metabolic process|mannose metabolic process	-	-
Gohir.A07G149550	A07	39841907	39842175	269	GhZFPH4_DAP-vs-GhZFPH4_neg_peak_2481	4.68439	7.79914	3.80034	1.59E-08	0.000158365	Distal Intergenic	39754076	39755459	1384	1	Gohir.A07G149550.2	87831	-	-	-	-	-	-	-	-
Gohir.D08G104200	D08	31785477	31785656	180	GhZFPH4_DAP-vs-GhZFPH4_neg_peak_6820	4.68439	7.79914	3.80034	1.59E-08	0.000158365	Distal Intergenic	31738504	31741525	3022	1	Gohir.D08G104200.4	46973	IPR010402	CCT domain	-	-	GO:0005515	protein binding	-	-
Gohir.A08G106000	A08	87789369	87789706	338	GhZFPH4_DAP-vs-GhZFPH4_neg_peak_3018	4.66938	7.70005	3.70836	2.00E-08	0.000195722	Distal Intergenic	87807974	87810738	2765	1	Gohir.A08G106000.1	-18268	IPR003441,IPR036093	NAC domain|NAC domain superfamily	-	-	GO:0003677,GO:0006355	DNA binding|regulation of transcription, DNA-templated	-	-
Gohir.A13G052300	A13	8977842	8978163	322	GhZFPH4_DAP-vs-GhZFPH4_neg_peak_4788	4.66253	8.13214	4.10868	7.38E-09	7.79E-05	Distal Intergenic	8943875	8950999	7125	1	Gohir.A13G052300.1	33967	-	-	-	-	-	-	-	-
Gohir.A05G204800	A05	20676473	20676859	387	GhZFPH4_DAP-vs-GhZFPH4_neg_peak_1647	4.65491	7.74789	3.75261	1.79E-08	0.000176762	Promoter (2-3kb)	20673526	20681432	7907	1	Gohir.A05G204800.8	2947	IPR001752,IPR027417,IPR027640,IPR036961	Kinesin motor domain|P-loop containing nucleoside triphosphate hydrolase|Kinesin-like protein|Kinesin motor domain superfamily	-	-	GO:0003777,GO:0005524,GO:0007018,GO:0008017	microtubule motor activity|ATP binding|microtubule-based movement|microtubule binding	ko01522	Endocrine resistance
Gohir.A06G137700	A06	108547559	108547738	180	GhZFPH4_DAP-vs-GhZFPH4_neg_peak_2315	4.65491	7.74789	3.75261	1.79E-08	0.000176762	Distal Intergenic	108494088	108500208	6121	1	Gohir.A06G137700.1	53471	IPR003959,IPR027417,IPR041569	ATPase, AAA-type, core|P-loop containing nucleoside triphosphate hydrolase|AAA ATPase, AAA+ lid domain	K07767	katanin p60 ATPase-containing subunit A1 [EC:5.6.1.1]	GO:0005524	ATP binding	ko01522	Endocrine resistance
Gohir.A12G079300	A12	48021439	48021737	299	GhZFPH4_DAP-vs-GhZFPH4_neg_peak_4520	4.65491	7.74789	3.75261	1.79E-08	0.000176762	Distal Intergenic	48006297	48008160	1864	2	Gohir.A12G079300.1	-13279	IPR011032,IPR013149,IPR013154,IPR036291	GroES-like superfamily|Alcohol dehydrogenase, C-terminal|Alcohol dehydrogenase, N-terminal|NAD(P)-binding domain superfamily	-	-	GO:0055114	oxidation-reduction process	-	-
Gohir.D01G014400	D01	1066606	1066746	141	GhZFPH4_DAP-vs-GhZFPH4_neg_peak_5133	4.65491	7.74789	3.75261	1.79E-08	0.000176762	Intron (Gohir.D01G014300.2/Gohir.D01G014300, intron 23 of 23)	1067913	1070926	3014	2	Gohir.D01G014400.1	4180	IPR001650,IPR011545,IPR014001,IPR014014,IPR027417	Helicase, C-terminal|DEAD/DEAH box helicase domain|Helicase superfamily 1/2, ATP-binding domain|RNA helicase, DEAD-box type, Q motif|P-loop containing nucleoside triphosphate hydrolase	K13025	ATP-dependent RNA helicase [EC:3.6.4.13]	GO:0003676,GO:0005524	nucleic acid binding|ATP binding	ko01522,ko03013,ko03015,ko03040	Endocrine resistance|RNA transport|mRNA surveillance pathway|Spliceosome
Gohir.D01G089800	D01	15902767	15902903	137	GhZFPH4_DAP-vs-GhZFPH4_neg_peak_5179	4.65491	7.74789	3.75261	1.79E-08	0.000176762	Distal Intergenic	15915971	15918010	2040	2	Gohir.D01G089800.1	15107	IPR008166,IPR029044	Glycosyltransferase family 92|Nucleotide-diphospho-sugar transferases	-	-	-	-	-	-
Gohir.D02G142060	D02	53419777	53420025	249	GhZFPH4_DAP-vs-GhZFPH4_neg_peak_5614	4.65491	7.74789	3.75261	1.79E-08	0.000176762	Promoter (2-3kb)	53417346	53419021	1676	1	Gohir.D02G142060.1	2431	-	-	-	-	-	-	-	-
Gohir.D03G072502	D03	23094231	23094379	149	GhZFPH4_DAP-vs-GhZFPH4_neg_peak_5740	4.65491	7.74789	3.75261	1.79E-08	0.000176762	Distal Intergenic	23120719	23122096	1378	2	Gohir.D03G072502.1	27717	IPR003891,IPR016021,IPR016024	Initiation factor eIF-4 gamma, MA3|MIF4G-like domain superfamily|Armadillo-type fold	-	-	-	-	-	-
Gohir.D06G120700	D06	37045866	37046182	317	GhZFPH4_DAP-vs-GhZFPH4_neg_peak_6399	4.65491	7.74789	3.75261	1.79E-08	0.000176762	Distal Intergenic	37128317	37135676	7360	1	Gohir.D06G120700.1	-82135	IPR002524,IPR027469,IPR040177	Cation efflux protein|Cation efflux transmembrane domain superfamily|Zinc transporter 9	-	-	GO:0006812,GO:0008324,GO:0016021,GO:0055085	cation transport|cation transmembrane transporter activity|integral component of membrane|transmembrane transport	ko01522	Endocrine resistance
Gohir.D07G147200	D07	24552508	24552688	181	GhZFPH4_DAP-vs-GhZFPH4_neg_peak_6561	4.65491	7.74789	3.75261	1.79E-08	0.000176762	Distal Intergenic	24518165	24522010	3846	1	Gohir.D07G147200.1	34343	IPR001606,IPR036431	ARID DNA-binding domain|ARID DNA-binding domain superfamily	-	-	GO:0003677	DNA binding	-	-
Gohir.D12G155732	D12	48853575	48853709	135	GhZFPH4_DAP-vs-GhZFPH4_neg_peak_7732	4.65491	7.74789	3.75261	1.79E-08	0.000176762	Promoter (<=1kb)	48853127	48855792	2666	1	Gohir.D12G155732.1	448	-	-	-	-	-	-	-	-
Gohir.D13G076500	D13	14266029	14266263	235	GhZFPH4_DAP-vs-GhZFPH4_neg_peak_7810	4.65491	7.74789	3.75261	1.79E-08	0.000176762	Distal Intergenic	14259788	14263761	3974	1	Gohir.D13G076500.5	6241	-	-	K21444	poly(rC)-binding protein 3/4	GO:0003723	RNA binding	ko01522	Endocrine resistance
Gohir.D13G123950	D13	42850059	42850209	151	GhZFPH4_DAP-vs-GhZFPH4_neg_peak_7913	4.65491	7.74789	3.75261	1.79E-08	0.000176762	Distal Intergenic	42827955	42829193	1239	2	Gohir.D13G123950.1	-20866	-	-	-	-	-	-	-	-
Gohir.A11G241350	A11	105039922	105040053	132	GhZFPH4_DAP-vs-GhZFPH4_neg_peak_4317	4.64031	7.72247	3.72939	1.89E-08	0.00018647	Distal Intergenic	104802595	104802819	225	2	Gohir.A11G241350.1	-237103	IPR008801	Rapid ALkalinization Factor	-	-	-	-	-	-
Gohir.A01G147100	A01	87304581	87304697	117	GhZFPH4_DAP-vs-GhZFPH4_neg_peak_321	4.63815	8.02209	4.00865	9.50E-09	9.80E-05	Distal Intergenic	87328252	87330537	2286	1	Gohir.A01G147100.2	-23555	IPR002110,IPR020683,IPR026961,IPR036770	Ankyrin repeat|Ankyrin repeat-containing domain|PGG domain|Ankyrin repeat-containing domain superfamily	-	-	GO:0005515	protein binding	-	-
Gohir.A13G095800	A13	57293212	57293355	144	GhZFPH4_DAP-vs-GhZFPH4_neg_peak_4965	4.63815	8.02209	4.00865	9.50E-09	9.80E-05	Distal Intergenic	57267398	57267565	168	1	Gohir.A13G095800.1	25814	IPR000454,IPR002379,IPR005953,IPR035921,IPR038662	ATP synthase, F0 complex, subunit C|V-ATPase proteolipid subunit C-like domain|ATP synthase, F0 complex, subunit C, bacterial/chloroplast|F/V-ATP synthase subunit C superfamily|F1F0 ATP synthase subunit C superfamily	-	-	GO:0015078,GO:0015986,GO:0033177,GO:0045263,GO:1902600	proton transmembrane transporter activity|ATP synthesis coupled proton transport|proton-transporting two-sector ATPase complex, proton-transporting domain|proton-transporting ATP synthase complex, coupling factor F(o)|proton transmembrane transport	-	-
Gohir.A03G109000	A03	71664866	71664995	130	GhZFPH4_DAP-vs-GhZFPH4_neg_peak_1074	4.63493	8.08228	4.06453	8.27E-09	8.62E-05	Distal Intergenic	71733315	71735725	2411	1	Gohir.A03G109000.1	-68320	IPR016964,IPR033118	Sigma intracellular receptor 2|EXPERA domain	-	-	-	-	-	-
Gohir.A07G199100	A07	93474251	93474378	128	GhZFPH4_DAP-vs-GhZFPH4_neg_peak_2720	4.63493	8.08228	4.06453	8.27E-09	8.62E-05	Promoter (2-3kb)	93473798	93476579	2782	2	Gohir.A07G199100.4	2201	-	-	-	-	-	-	-	-
Gohir.D09G043144	D09	18606800	18607040	241	GhZFPH4_DAP-vs-GhZFPH4_neg_peak_7050	4.63493	8.08228	4.06453	8.27E-09	8.62E-05	Distal Intergenic	18648726	18649666	941	1	Gohir.D09G043144.1	-41686	-	-	-	-	-	-	-	-
Gohir.D10G016000	D10	1288988	1289160	173	GhZFPH4_DAP-vs-GhZFPH4_neg_peak_7149	4.63493	8.08228	4.06453	8.27E-09	8.62E-05	Promoter (<=1kb)	1288277	1290812	2536	1	Gohir.D10G016000.2	711	-	-	-	-	-	-	-	-
Gohir.A09G009200	A09	2495782	2495925	144	GhZFPH4_DAP-vs-GhZFPH4_neg_peak_3155	4.6258	7.69719	3.70571	2.01E-08	0.00019692	Promoter (2-3kb)	2492954	2495490	2537	1	Gohir.A09G009200.1	2828	IPR012463,IPR031307,IPR032308,IPR032310	Ethylene-responsive binding factor-associated repression|Ninja family|Jas TPL-binding domain|Putative nuclear localisation signal	-	-	GO:0007165	signal transduction	-	-
Gohir.D04G126700	D04	46825965	46826160	196	GhZFPH4_DAP-vs-GhZFPH4_neg_peak_6044	4.6258	7.69719	3.70571	2.01E-08	0.00019692	Promoter (<=1kb)	46826314	46829209	2896	1	Gohir.D04G126700.1	-154	IPR001117,IPR008972,IPR011706,IPR011707,IPR017761	Multicopper oxidase, type 1|Cupredoxin|Multicopper oxidase, type 2|Multicopper oxidase, type 3|Laccase	-	-	GO:0005507,GO:0016491,GO:0046274,GO:0048046,GO:0052716,GO:0055114	copper ion binding|oxidoreductase activity|lignin catabolic process|apoplast|hydroquinone:oxygen oxidoreductase activity|oxidation-reduction process	-	-
Gohir.A09G047800	A09	45189316	45189529	214	GhZFPH4_DAP-vs-GhZFPH4_neg_peak_3392	4.62125	8.05753	4.04169	8.76E-09	9.08E-05	Distal Intergenic	45257280	45264826	7547	1	Gohir.A09G047800.2	-67751	IPR001715,IPR001752,IPR027417,IPR027640,IPR036872,IPR036961	Calponin homology domain|Kinesin motor domain|P-loop containing nucleoside triphosphate hydrolase|Kinesin-like protein|CH domain superfamily|Kinesin motor domain superfamily	-	-	GO:0003777,GO:0005515,GO:0005524,GO:0007018,GO:0008017	microtubule motor activity|protein binding|ATP binding|microtubule-based movement|microtubule binding	ko01522	Endocrine resistance
Gohir.D10G139800	D10	27640433	27640596	164	GhZFPH4_DAP-vs-GhZFPH4_neg_peak_7232	4.62125	8.05753	4.04169	8.76E-09	9.08E-05	Distal Intergenic	27628304	27632905	4602	2	Gohir.D10G139800.3	-7528	-	-	-	-	-	-	-	-
Gohir.D11G220800	D11	34801576	34801765	190	GhZFPH4_DAP-vs-GhZFPH4_neg_peak_7459	4.62125	8.05753	4.04169	8.76E-09	9.08E-05	Distal Intergenic	34826757	34832092	5336	2	Gohir.D11G220800.1	30327	-	-	-	-	GO:0000902,GO:0007023,GO:0015631	cell morphogenesis|post-chaperonin tubulin folding pathway|tubulin binding	ko01522	Endocrine resistance
Gohir.D02G195175	D02	67907538	67907696	159	GhZFPH4_DAP-vs-GhZFPH4_neg_peak_5666	4.61718	7.60887	3.62412	2.46E-08	0.000237618	Promoter (1-2kb)	67909535	67910053	519	1	Gohir.D02G195175.1	-1839	-	-	-	-	-	-	-	-
Gohir.A01G122600	A01	28945257	28945402	146	GhZFPH4_DAP-vs-GhZFPH4_neg_peak_87	4.61138	7.67203	3.68289	2.13E-08	0.000207544	Distal Intergenic	28913818	28918557	4740	1	Gohir.A01G122600.1	31439	IPR000504,IPR002004,IPR006515,IPR012677,IPR035979,IPR036053	RNA recognition motif domain|Polyadenylate-binding protein/Hyperplastic disc protein|Polyadenylate binding protein, human types 1, 2, 3, 4|Nucleotide-binding alpha-beta plait domain superfamily|RNA-binding domain superfamily|PABC (PABP) domain	K13126	polyadenylate-binding protein	GO:0003676,GO:0003723	nucleic acid binding|RNA binding	ko01522,ko03013,ko03015,ko03018	Endocrine resistance|RNA transport|mRNA surveillance pathway|RNA degradation
Gohir.A07G170100	A07	57683460	57683808	349	GhZFPH4_DAP-vs-GhZFPH4_neg_peak_2558	4.61138	7.67203	3.68289	2.13E-08	0.000207544	Distal Intergenic	57635516	57641155	5640	1	Gohir.A07G170100.1	47944	IPR001041,IPR006656,IPR006963,IPR010228,IPR015405,IPR019574,IPR036010	2Fe-2S ferredoxin-type iron-sulfur binding domain|Molybdopterin oxidoreductase|Molybdopterin oxidoreductase, 4Fe-4S domain|NADH:ubiquinone oxidoreductase, subunit G|NADH-quinone oxidoreductase, chain G, C-terminal|NADH:ubiquinone oxidoreductase, subunit G, iron-sulphur binding|2Fe-2S ferredoxin-like superfamily	K03934	NADH dehydrogenase (ubiquinone) Fe-S protein 1 [EC:7.1.1.2 1.6.99.3]	GO:0009055,GO:0016491,GO:0016651,GO:0051536,GO:0055114	electron transfer activity|oxidoreductase activity|oxidoreductase activity, acting on NAD(P)H|iron-sulfur cluster binding|oxidation-reduction process	ko00190,ko04714,ko04723	Oxidative phosphorylation|Thermogenesis|Retrograde endocannabinoid signaling
Gohir.A12G062100	A12	14608502	14608708	207	GhZFPH4_DAP-vs-GhZFPH4_neg_peak_4413	4.61138	7.67203	3.68289	2.13E-08	0.000207544	Distal Intergenic	14623589	14629595	6007	1	Gohir.A12G062100.1	-14881	-	-	-	-	-	-	-	-
Gohir.A07G187699	A07	88665259	88665541	283	GhZFPH4_DAP-vs-GhZFPH4_neg_peak_2702	4.60132	7.95502	3.9464	1.11E-08	0.000113136	Distal Intergenic	88631442	88631942	501	1	Gohir.A07G187699.1	33817	IPR005135,IPR036691	Endonuclease/exonuclease/phosphatase|Endonuclease/exonuclease/phosphatase superfamily	-	-	-	-	-	-
Gohir.A01G145438	A01	74661913	74662100	188	GhZFPH4_DAP-vs-GhZFPH4_neg_peak_266	4.59861	8.32369	4.28848	4.75E-09	5.15E-05	Distal Intergenic	74534076	74535281	1206	1	Gohir.A01G145438.2	127837	IPR020471,IPR023210,IPR036812	Aldo/keto reductase|NADP-dependent oxidoreductase domain|NADP-dependent oxidoreductase domain superfamily	-	-	GO:0016491,GO:0055114	oxidoreductase activity|oxidation-reduction process	-	-
Gohir.A09G042800	A09	36068961	36069081	121	GhZFPH4_DAP-vs-GhZFPH4_neg_peak_3337	4.59705	7.64701	3.65972	2.25E-08	0.000218917	Distal Intergenic	35896416	35898637	2222	2	Gohir.A09G042800.1	-170324	IPR000719,IPR011009	Protein kinase domain|Protein kinase-like domain superfamily	-	-	GO:0004672,GO:0005524,GO:0006468	protein kinase activity|ATP binding|protein phosphorylation	-	-
Gohir.D01G135000	D01	42020105	42020280	176	GhZFPH4_DAP-vs-GhZFPH4_neg_peak_5332	4.59705	7.64701	3.65972	2.25E-08	0.000218917	Promoter (1-2kb)	42016266	42018650	2385	2	Gohir.D01G135000.1	-1455	IPR010409	GAGA-binding transcriptional activator	-	-	-	-	-	-
Gohir.A01G053600	A01	5978526	5978739	214	GhZFPH4_DAP-vs-GhZFPH4_neg_peak_16	4.59258	7.274	3.31302	5.32E-08	0.000486385	Promoter (2-3kb)	5979345	5981168	1824	2	Gohir.A01G053600.1	2429	IPR032710	NTF2-like domain superfamily	-	-	-	-	-	-
Gohir.A01G096400	A01	16281208	16281560	353	GhZFPH4_DAP-vs-GhZFPH4_neg_peak_44	4.59258	7.274	3.31302	5.32E-08	0.000486385	Distal Intergenic	16285646	16286480	835	1	Gohir.A01G096400.1	-4086	IPR001841,IPR013083	Zinc finger, RING-type|Zinc finger, RING/FYVE/PHD-type	-	-	-	-	-	-
Gohir.A01G137526	A01	52320625	52320816	192	GhZFPH4_DAP-vs-GhZFPH4_neg_peak_170	4.59258	7.274	3.31302	5.32E-08	0.000486385	Distal Intergenic	52870754	52871512	759	1	Gohir.A01G137526.1	-549938	-	-	-	-	-	-	-	-
Gohir.A01G137526	A01	52414024	52414929	906	GhZFPH4_DAP-vs-GhZFPH4_neg_peak_171	4.59258	7.274	3.31302	5.32E-08	0.000486385	Distal Intergenic	52870754	52871512	759	1	Gohir.A01G137526.1	-455825	-	-	-	-	-	-	-	-
Gohir.A01G142101	A01	71448821	71449071	251	GhZFPH4_DAP-vs-GhZFPH4_neg_peak_250	4.59258	7.274	3.31302	5.32E-08	0.000486385	Distal Intergenic	71454932	71457171	2240	2	Gohir.A01G142101.1	8100	IPR002213	UDP-glucuronosyl/UDP-glucosyltransferase	K11820	N-hydroxythioamide S-beta-glucosyltransferase [EC:2.4.1.195]	GO:0008194	UDP-glycosyltransferase activity	ko00380,ko00966,ko01522	Tryptophan metabolism|Glucosinolate biosynthesis|Endocrine resistance
Gohir.A01G147600	A01	85469113	85469258	146	GhZFPH4_DAP-vs-GhZFPH4_neg_peak_316	4.59258	7.274	3.31302	5.32E-08	0.000486385	Distal Intergenic	85388339	85393615	5277	2	Gohir.A01G147600.1	-75498	IPR000608,IPR016135	Ubiquitin-conjugating enzyme E2|Ubiquitin-conjugating enzyme/RWD-like	-	-	-	-	ko01522,ko04624,ko05131	Endocrine resistance|Toll and Imd signaling pathway|Shigellosis
Gohir.A01G150018	A01	81633243	81633397	155	GhZFPH4_DAP-vs-GhZFPH4_neg_peak_300	4.59258	7.274	3.31302	5.32E-08	0.000486385	Distal Intergenic	81776526	81776788	263	1	Gohir.A01G150018.1	-143129	IPR003372,IPR013081,IPR037266	Photosystem II PsbL|Photosystem II cytochrome b559, N-terminal|Photosystem II PsbL superfamily	K02713	photosystem II PsbL protein	GO:0009523,GO:0009539,GO:0015979,GO:0016020	photosystem II|photosystem II reaction center|photosynthesis|membrane	ko00195,ko01522	Photosynthesis|Endocrine resistance
Gohir.A01G163100	A01	104054647	104054771	125	GhZFPH4_DAP-vs-GhZFPH4_neg_peak_384	4.59258	7.274	3.31302	5.32E-08	0.000486385	Distal Intergenic	104017327	104018790	1464	2	Gohir.A01G163100.1	-35857	IPR000425,IPR023271	Major intrinsic protein|Aquaporin-like	-	-	GO:0015267,GO:0016020,GO:0055085	channel activity|membrane|transmembrane transport	ko01522,ko04962,ko04976	Endocrine resistance|Vasopressin-regulated water reabsorption|Bile secretion
Gohir.A01G172700	A01	108373471	108373704	234	GhZFPH4_DAP-vs-GhZFPH4_neg_peak_403	4.59258	7.274	3.31302	5.32E-08	0.000486385	Distal Intergenic	108342299	108344848	2550	1	Gohir.A01G172700.2	31172	IPR005269,IPR031100	Cytokinin riboside 5'-monophosphate phosphoribohydrolase LOG|LOG family	K22522	cytokinin riboside 5'-monophosphate phosphoribohydrolase [EC:3.2.2.-]	-	-	ko01522	Endocrine resistance
Gohir.A02G083300	A02	30965513	30965715	203	GhZFPH4_DAP-vs-GhZFPH4_neg_peak_539	4.59258	7.274	3.31302	5.32E-08	0.000486385	Distal Intergenic	31017907	31020034	2128	1	Gohir.A02G083300.1	-52192	-	-	K04392	Ras-related C3 botulinum toxin substrate 1	-	-	ko01522,ko04010,ko04013,ko04014,ko04015,ko04024,ko04062,ko04071,ko04145,ko04151,ko04310,ko04360,ko04361,ko04370,ko04380,ko04510,ko04520,ko04530,ko04620,ko04650,ko04662,ko04664,ko04666,ko04670,ko04722,ko04810,ko04933,ko04972,ko05014,ko05100,ko05120,ko05130,ko05131,ko05132,ko05135,ko05167,ko05169,ko05203,ko05211,ko05416,ko05418	Endocrine resistance|MAPK signaling pathway|MAPK signaling pathway - fly|Ras signaling pathway|Rap1 signaling pathway|cAMP signaling pathway|Chemokine signaling pathway|Sphingolipid signaling pathway|Phagosome|PI3K-Akt signaling pathway|Wnt signaling pathway|Axon guidance|Axon regeneration|VEGF signaling pathway|Osteoclast differentiation|Focal adhesion|Adherens junction|Tight junction|Toll-like …
Gohir.A02G105000	A02	50045372	50045553	182	GhZFPH4_DAP-vs-GhZFPH4_neg_peak_610	4.59258	7.274	3.31302	5.32E-08	0.000486385	Distal Intergenic	50096880	50100823	3944	1	Gohir.A02G105000.4	-51327	-	-	-	-	-	-	-	-
Gohir.A02G125600	A02	91221294	91221402	109	GhZFPH4_DAP-vs-GhZFPH4_neg_peak_759	4.59258	7.274	3.31302	5.32E-08	0.000486385	Distal Intergenic	91112645	91117709	5065	2	Gohir.A02G125600.1	-103585	-	-	K05610	ubiquitin carboxyl-terminal hydrolase L5 [EC:3.4.19.12]	-	-	ko01522	Endocrine resistance
Gohir.A02G130800	A02	98452362	98452549	188	GhZFPH4_DAP-vs-GhZFPH4_neg_peak_779	4.59258	7.274	3.31302	5.32E-08	0.000486385	Distal Intergenic	98393089	98394985	1897	1	Gohir.A02G130800.2	59273	-	-	-	-	-	-	-	-
Gohir.A02G135000	A02	99752387	99752509	123	GhZFPH4_DAP-vs-GhZFPH4_neg_peak_803	4.59258	7.274	3.31302	5.32E-08	0.000486385	Distal Intergenic	99757232	99763828	6597	1	Gohir.A02G135000.1	-4723	-	-	K00705	4-alpha-glucanotransferase [EC:2.4.1.25]	-	-	ko00500	Starch and sucrose metabolism
Gohir.A02G144100	A02	103512527	103512715	189	GhZFPH4_DAP-vs-GhZFPH4_neg_peak_813	4.59258	7.274	3.31302	5.32E-08	0.000486385	Distal Intergenic	103504932	103507637	2706	2	Gohir.A02G144100.1	-4890	-	-	K01087	trehalose 6-phosphate phosphatase [EC:3.1.3.12]	-	-	ko00500	Starch and sucrose metabolism
Gohir.A03G080800	A03	28383705	28383881	177	GhZFPH4_DAP-vs-GhZFPH4_neg_peak_926	4.59258	7.274	3.31302	5.32E-08	0.000486385	Distal Intergenic	28504193	28508750	4558	2	Gohir.A03G080800.1	124869	IPR000504,IPR012677,IPR035979,IPR037366	RNA recognition motif domain|Nucleotide-binding alpha-beta plait domain superfamily|RNA-binding domain superfamily|BOULE/DAZ family	-	-	GO:0003676,GO:0003729	nucleic acid binding|mRNA binding	-	-
Gohir.A03G089700	A03	43721558	43721703	146	GhZFPH4_DAP-vs-GhZFPH4_neg_peak_996	4.59258	7.274	3.31302	5.32E-08	0.000486385	Distal Intergenic	43782957	43784035	1079	1	Gohir.A03G089700.1	-61254	IPR006917,IPR011256	SOUL haem-binding protein|Regulatory factor, effector binding domain superfamily	-	-	-	-	-	-
Gohir.A03G094200	A03	49799198	49799368	171	GhZFPH4_DAP-vs-GhZFPH4_neg_peak_1015	4.59258	7.274	3.31302	5.32E-08	0.000486385	Distal Intergenic	49795316	49797343	2028	1	Gohir.A03G094200.1	3882	IPR005755,IPR005822,IPR036899	Ribosomal protein L13, eukaryotic/archaeal|Ribosomal protein L13|Ribosomal protein L13 superfamily	K02872	large subunit ribosomal protein L13Ae	GO:0003735,GO:0005840,GO:0006412,GO:0015934	structural constituent of ribosome|ribosome|translation|large ribosomal subunit	ko01522,ko03010	Endocrine resistance|Ribosome
Gohir.A03G096300	A03	52310895	52311094	200	GhZFPH4_DAP-vs-GhZFPH4_neg_peak_1022	4.59258	7.274	3.31302	5.32E-08	0.000486385	Distal Intergenic	52244210	52258049	13840	1	Gohir.A03G096300.1	66685	IPR005123	Oxoglutarate/iron-dependent dioxygenase	K00472	prolyl 4-hydroxylase [EC:1.14.11.2]	GO:0016491,GO:0055114	oxidoreductase activity|oxidation-reduction process	ko00330	Arginine and proline metabolism
Gohir.A03G108200	A03	71021077	71021255	179	GhZFPH4_DAP-vs-GhZFPH4_neg_peak_1061	4.59258	7.274	3.31302	5.32E-08	0.000486385	Distal Intergenic	71029568	71032330	2763	1	Gohir.A03G108200.1	-8313	-	-	-	-	-	-	-	-
Gohir.A03G114700	A03	86465749	86465915	167	GhZFPH4_DAP-vs-GhZFPH4_neg_peak_1117	4.59258	7.274	3.31302	5.32E-08	0.000486385	Distal Intergenic	86415389	86417187	1799	1	Gohir.A03G114700.1	50360	IPR000086,IPR015797	NUDIX hydrolase domain|NUDIX hydrolase-like domain superfamily	K07766	diphosphoinositol-polyphosphate diphosphatase [EC:3.6.1.52]	GO:0016787	hydrolase activity	ko01522	Endocrine resistance
Gohir.A03G128350	A03	93173274	93173811	538	GhZFPH4_DAP-vs-GhZFPH4_neg_peak_1138	4.59258	7.274	3.31302	5.32E-08	0.000486385	Distal Intergenic	93189936	93190466	531	1	Gohir.A03G128350.1	-16125	-	-	-	-	-	-	-	-
Gohir.A03G133700	A03	96450611	96450774	164	GhZFPH4_DAP-vs-GhZFPH4_neg_peak_1144	4.59258	7.274	3.31302	5.32E-08	0.000486385	Promoter (2-3kb)	96453611	96457060	3450	1	Gohir.A03G133700.1	-2837	IPR036890	Histidine kinase/HSP90-like ATPase superfamily	-	-	-	-	-	-
Gohir.A03G157600	A03	105914501	105914800	300	GhZFPH4_DAP-vs-GhZFPH4_neg_peak_1196	4.59258	7.274	3.31302	5.32E-08	0.000486385	Distal Intergenic	105905164	105907501	2338	2	Gohir.A03G157600.1	-7000	IPR003663,IPR005828,IPR020846,IPR036259	Sugar/inositol transporter|Major facilitator, sugar transporter-like|Major facilitator superfamily domain|MFS transporter superfamily	-	-	GO:0016020,GO:0016021,GO:0022857,GO:0055085	membrane|integral component of membrane|transmembrane transporter activity|transmembrane transport	-	-
Gohir.A04G065342	A04	55919551	55919802	252	GhZFPH4_DAP-vs-GhZFPH4_neg_peak_1474	4.59258	7.274	3.31302	5.32E-08	0.000486385	Distal Intergenic	55852358	55858293	5936	2	Gohir.A04G065342.1	-61258	IPR001623,IPR004179,IPR014756,IPR035892,IPR036869	DnaJ domain|Sec63 domain|Immunoglobulin E-set|C2 domain superfamily|Chaperone J-domain superfamily	K09540	translocation protein SEC63	-	-	ko01522,ko03060,ko04141	Endocrine resistance|Protein export|Protein processing in endoplasmic reticulum
Gohir.A04G068100	A04	62956119	62956398	280	GhZFPH4_DAP-vs-GhZFPH4_neg_peak_1500	4.59258	7.274	3.31302	5.32E-08	0.000486385	Distal Intergenic	62907770	62911871	4102	1	Gohir.A04G068100.1	48349	IPR001650,IPR011545,IPR014001,IPR014014,IPR027417	Helicase, C-terminal|DEAD/DEAH box helicase domain|Helicase superfamily 1/2, ATP-binding domain|RNA helicase, DEAD-box type, Q motif|P-loop containing nucleoside triphosphate hydrolase	K18655	ATP-dependent RNA helicase DDX19/DBP5 [EC:3.6.4.13]	GO:0003676,GO:0005524	nucleic acid binding|ATP binding	ko01522	Endocrine resistance
Gohir.A05G071100	A05	6894545	6894758	214	GhZFPH4_DAP-vs-GhZFPH4_neg_peak_1594	4.59258	7.274	3.31302	5.32E-08	0.000486385	Promoter (2-3kb)	6891990	6893331	1342	1	Gohir.A05G071100.1	2555	IPR005175,IPR014476	PPC domain|AT-hook motif nuclear-localized protein 15-29	-	-	GO:0003680	AT DNA binding	-	-
Gohir.A05G106900	A05	10072372	10072489	118	GhZFPH4_DAP-vs-GhZFPH4_neg_peak_1611	4.59258	7.274	3.31302	5.32E-08	0.000486385	Promoter (2-3kb)	10068038	10069654	1617	2	Gohir.A05G106900.1	-2718	IPR004263,IPR040911	Exostosin-like|Exostosin, GT47 domain	-	-	GO:0006486,GO:0016757	protein glycosylation|transferase activity, transferring glycosyl groups	-	-
Gohir.A05G248700	A05	27192598	27192791	194	GhZFPH4_DAP-vs-GhZFPH4_neg_peak_1662	4.59258	7.274	3.31302	5.32E-08	0.000486385	Promoter (<=1kb)	27191741	27195207	3467	1	Gohir.A05G248700.1	857	IPR005061,IPR042277	Vacuolar protein sorting-associated protein Ist1|Vacuolar protein sorting-associated protein IST1-like	-	-	GO:0015031	protein transport	ko04144	Endocytosis
Gohir.A05G258000	A05	28627508	28627675	168	GhZFPH4_DAP-vs-GhZFPH4_neg_peak_1666	4.59258	7.274	3.31302	5.32E-08	0.000486385	Distal Intergenic	28633336	28635694	2359	1	Gohir.A05G258000.1	-5661	IPR003196,IPR011039,IPR036388,IPR036390,IPR040450,IPR040504	Transcription initiation factor IIF, beta subunit|Transcription Factor IIF, Rap30/Rap74, interaction|Winged helix-like DNA-binding domain superfamily|Winged helix DNA-binding domain superfamily|TFIIF beta subunit, HTH domain|TFIIF, beta subunit, N-terminal	K03139	transcription initiation factor TFIIF subunit beta [EC:3.6.4.12]	GO:0005674,GO:0006366,GO:0006367	transcription factor TFIIF complex|transcription by RNA polymerase II|transcription initiation from RNA polymerase II promoter	ko01522,ko03022	Endocrine resistance|Basal transcription factors
Gohir.A05G306101	A05	44793493	44793700	208	GhZFPH4_DAP-vs-GhZFPH4_neg_peak_1715	4.59258	7.274	3.31302	5.32E-08	0.000486385	Distal Intergenic	44797063	44800270	3208	2	Gohir.A05G306101.1	6570	IPR001680,IPR015879,IPR015943,IPR017986,IPR036322	WD40 repeat|Aromatic-ring-hydroxylating dioxygenase, alpha subunit, C-terminal domain|WD40/YVTN repeat-like-containing domain superfamily|WD40-repeat-containing domain|WD40-repeat-containing domain superfamily	-	-	GO:0005506,GO:0005515,GO:0044237,GO:0051537,GO:0055114	iron ion binding|protein binding|cellular metabolic process|2 iron, 2 sulfur cluster binding|oxidation-reduction process	-	-
Gohir.A05G312300	A05	51288745	51288875	131	GhZFPH4_DAP-vs-GhZFPH4_neg_peak_1744	4.59258	7.274	3.31302	5.32E-08	0.000486385	Distal Intergenic	51405715	51411072	5358	2	Gohir.A05G312300.4	122197	IPR001841,IPR010734,IPR013083,IPR036465	Zinc finger, RING-type|Copine|Zinc finger, RING/FYVE/PHD-type|von Willebrand factor A-like domain superfamily	K16280	E3 ubiquitin-protein ligase RGLG [EC:2.3.2.27]	-	-	ko01522	Endocrine resistance
Gohir.A05G314200	A05	58051822	58051949	128	GhZFPH4_DAP-vs-GhZFPH4_neg_peak_1768	4.59258	7.274	3.31302	5.32E-08	0.000486385	Distal Intergenic	58674699	58675268	570	2	Gohir.A05G314200.1	623319	IPR009606	Modifying wall lignin-1/2	-	-	-	-	-	-
Gohir.A05G317500	A05	76530123	76530329	207	GhZFPH4_DAP-vs-GhZFPH4_neg_peak_1850	4.59258	7.274	3.31302	5.32E-08	0.000486385	Distal Intergenic	76576199	76578969	2771	2	Gohir.A05G317500.1	48640	IPR002528	Multi antimicrobial extrusion protein	-	-	GO:0015297,GO:0016020,GO:0042910,GO:0055085	antiporter activity|membrane|xenobiotic transmembrane transporter activity|transmembrane transport	ko01522	Endocrine resistance
Gohir.A05G345600	A05	88131756	88131958	203	GhZFPH4_DAP-vs-GhZFPH4_neg_peak_1886	4.59258	7.274	3.31302	5.32E-08	0.000486385	Distal Intergenic	88152002	88161398	9397	1	Gohir.A05G345600.1	-20044	-	-	-	-	-	-	-	-
Gohir.A06G062700	A06	14038875	14038979	105	GhZFPH4_DAP-vs-GhZFPH4_neg_peak_1988	4.59258	7.274	3.31302	5.32E-08	0.000486385	Distal Intergenic	13586038	13588673	2636	1	Gohir.A06G062700.2	452837	IPR020946,IPR036188,IPR000960	Flavin monooxygenase-like|FAD/NAD(P)-binding domain superfamily|Flavin monooxygenase FMO	K11816	indole-3-pyruvate monooxygenase [EC:1.14.13.168]	GO:0004499,GO:0050660,GO:0050661,GO:0055114	N,N-dimethylaniline monooxygenase activity|flavin adenine dinucleotide binding|NADP binding|oxidation-reduction process	ko00380	Tryptophan metabolism
Gohir.A06G078500	A06	21398449	21398565	117	GhZFPH4_DAP-vs-GhZFPH4_neg_peak_2018	4.59258	7.274	3.31302	5.32E-08	0.000486385	Distal Intergenic	21416559	21422389	5831	1	Gohir.A06G078500.1	-17994	IPR000504,IPR012677,IPR035979	RNA recognition motif domain|Nucleotide-binding alpha-beta plait domain superfamily|RNA-binding domain superfamily	K13201	nucleolysin TIA-1/TIAR	GO:0003676	nucleic acid binding	ko01522	Endocrine resistance
Gohir.A06G084000	A06	27755235	27755408	174	GhZFPH4_DAP-vs-GhZFPH4_neg_peak_2037	4.59258	7.274	3.31302	5.32E-08	0.000486385	Distal Intergenic	27736268	27738937	2670	2	Gohir.A06G084000.1	-16298	IPR019410,IPR029063	Lysine methyltransferase|S-adenosyl-L-methionine-dependent methyltransferase	K21806	protein N-lysine methyltransferase METTL21D [EC:2.1.1.-]	-	-	ko01522	Endocrine resistance
Gohir.A06G103200	A06	43213334	43213491	158	GhZFPH4_DAP-vs-GhZFPH4_neg_peak_2074	4.59258	7.274	3.31302	5.32E-08	0.000486385	Distal Intergenic	43110254	43123975	13722	2	Gohir.A06G103200.1	-89359	IPR000490,IPR012946,IPR017853	Glycoside hydrolase family 17|X8 domain|Glycoside hydrolase superfamily	K19892	glucan endo-1,3-beta-glucosidase 4 [EC:3.2.1.39]	GO:0004553,GO:0005975	hydrolase activity, hydrolyzing O-glycosyl compounds|carbohydrate metabolic process	ko00500,ko01522	Starch and sucrose metabolism|Endocrine resistance
Gohir.A06G112506	A06	59558762	59558941	180	GhZFPH4_DAP-vs-GhZFPH4_neg_peak_2150	4.59258	7.274	3.31302	5.32E-08	0.000486385	Distal Intergenic	59900588	59903240	2653	1	Gohir.A06G112506.1	-341647	IPR000719,IPR001611,IPR011009,IPR013210,IPR032675	Protein kinase domain|Leucine-rich repeat|Protein kinase-like domain superfamily|Leucine-rich repeat-containing N-terminal, plant-type|Leucine-rich repeat domain superfamily	-	-	GO:0004672,GO:0005515,GO:0005524,GO:0006468	protein kinase activity|protein binding|ATP binding|protein phosphorylation	-	-
Gohir.A06G112506	A06	59888031	59888237	207	GhZFPH4_DAP-vs-GhZFPH4_neg_peak_2151	4.59258	7.274	3.31302	5.32E-08	0.000486385	Distal Intergenic	59900588	59903240	2653	1	Gohir.A06G112506.1	-12351	IPR000719,IPR001611,IPR011009,IPR013210,IPR032675	Protein kinase domain|Leucine-rich repeat|Protein kinase-like domain superfamily|Leucine-rich repeat-containing N-terminal, plant-type|Leucine-rich repeat domain superfamily	-	-	GO:0004672,GO:0005515,GO:0005524,GO:0006468	protein kinase activity|protein binding|ATP binding|protein phosphorylation	-	-
Gohir.A06G118500	A06	74882984	74883242	259	GhZFPH4_DAP-vs-GhZFPH4_neg_peak_2195	4.59258	7.274	3.31302	5.32E-08	0.000486385	Distal Intergenic	74918044	74919174	1131	1	Gohir.A06G118500.2	-34802	-	-	-	-	-	-	-	-
Gohir.A06G128102	A06	88185527	88185648	122	GhZFPH4_DAP-vs-GhZFPH4_neg_peak_2257	4.59258	7.274	3.31302	5.32E-08	0.000486385	Distal Intergenic	88245343	88246347	1005	2	Gohir.A06G128102.1	60699	IPR036691	Endonuclease/exonuclease/phosphatase superfamily	-	-	-	-	-	-
Gohir.A06G134000	A06	103206901	103207080	180	GhZFPH4_DAP-vs-GhZFPH4_neg_peak_2303	4.59258	7.274	3.31302	5.32E-08	0.000486385	Distal Intergenic	103102376	103105517	3142	1	Gohir.A06G134000.1	104525	IPR000225,IPR003613,IPR011989,IPR013083,IPR016024	Armadillo|U box domain|Armadillo-like helical|Zinc finger, RING/FYVE/PHD-type|Armadillo-type fold	-	-	GO:0004842,GO:0005515,GO:0016567	ubiquitin-protein transferase activity|protein binding|protein ubiquitination	-	-
Gohir.A06G146100	A06	115710054	115710161	108	GhZFPH4_DAP-vs-GhZFPH4_neg_peak_2344	4.59258	7.274	3.31302	5.32E-08	0.000486385	Distal Intergenic	115644335	115646913	2579	1	Gohir.A06G146100.1	65719	IPR006918	COBRA, plant	-	-	GO:0010215,GO:0031225	cellulose microfibril organization|anchored component of membrane	-	-
Gohir.A07G049900	A07	6546938	6547171	234	GhZFPH4_DAP-vs-GhZFPH4_neg_peak_2391	4.59258	7.274	3.31302	5.32E-08	0.000486385	Promoter (<=1kb)	6546745	6547985	1241	2	Gohir.A07G049900.1	814	-	-	-	-	-	-	-	-
Gohir.A07G092600	A07	15682558	15682747	190	GhZFPH4_DAP-vs-GhZFPH4_neg_peak_2418	4.59258	7.274	3.31302	5.32E-08	0.000486385	Distal Intergenic	15695702	15698118	2417	1	Gohir.A07G092600.1	-12955	IPR001128,IPR002401,IPR036396	Cytochrome P450|Cytochrome P450, E-class, group I|Cytochrome P450 superfamily	K17961	trimethyltridecatetraene/dimethylnonatriene synthase [EC:1.14.14.58 1.14.14.59]	GO:0005506,GO:0016705,GO:0020037,GO:0055114	iron ion binding|oxidoreductase activity, acting on paired donors, with incorporation or reduction of molecular oxygen|heme binding|oxidation-reduction process	ko00904,ko01522	Diterpenoid biosynthesis|Endocrine resistance
Gohir.A07G125600	A07	26384275	26384431	157	GhZFPH4_DAP-vs-GhZFPH4_neg_peak_2443	4.59258	7.274	3.31302	5.32E-08	0.000486385	Distal Intergenic	26440441	26447561	7121	1	Gohir.A07G125600.1	-56010	IPR008928,IPR012878,IPR036195	Six-hairpin glycosidase superfamily|Beta-L-arabinofuranosidase, GH127|Alpha-L-arabinofuranosidase B, arabinose-binding domain superfamily	-	-	GO:0003824,GO:0046373,GO:0046556	catalytic activity|L-arabinose metabolic process|alpha-L-arabinofuranosidase activity	ko01522	Endocrine resistance
Gohir.A07G148300	A07	37849093	37849262	170	GhZFPH4_DAP-vs-GhZFPH4_neg_peak_2477	4.59258	7.274	3.31302	5.32E-08	0.000486385	Distal Intergenic	37835047	37835454	408	2	Gohir.A07G148300.1	-13639	IPR001471,IPR016177,IPR036955	AP2/ERF domain|DNA-binding domain superfamily|AP2/ERF domain superfamily	-	-	GO:0003677,GO:0003700,GO:0006355	DNA binding|DNA-binding transcription factor activity|regulation of transcription, DNA-templated	-	-
Gohir.A07G158310	A07	50671660	50671984	325	GhZFPH4_DAP-vs-GhZFPH4_neg_peak_2516	4.59258	7.274	3.31302	5.32E-08	0.000486385	Distal Intergenic	50708831	50709437	607	2	Gohir.A07G158310.1	37453	-	-	-	-	-	-	-	-
Gohir.A07G167900	A07	64350224	64350388	165	GhZFPH4_DAP-vs-GhZFPH4_neg_peak_2589	4.59258	7.274	3.31302	5.32E-08	0.000486385	Distal Intergenic	64386341	64387547	1207	2	Gohir.A07G167900.1	37159	IPR000743,IPR011050,IPR012334	Glycoside hydrolase, family 28|Pectin lyase fold/virulence factor|Pectin lyase fold	K01213	galacturan 1,4-alpha-galacturonidase [EC:3.2.1.67]	GO:0004650,GO:0005975	polygalacturonase activity|carbohydrate metabolic process	ko00040	Pentose and glucuronate interconversions
Gohir.A07G174400	A07	78699147	78699315	169	GhZFPH4_DAP-vs-GhZFPH4_neg_peak_2640	4.59258	7.274	3.31302	5.32E-08	0.000486385	Distal Intergenic	78711966	78721404	9439	1	Gohir.A07G174400.2	-12651	IPR006594,IPR011989,IPR016024,IPR021133,IPR040362	LIS1 homology motif|Armadillo-like helical|Armadillo-type fold|HEAT, type 2|RAB11-binding protein RELCH	-	-	GO:0005515,GO:0005802,GO:0032367	protein binding|trans-Golgi network|intracellular cholesterol transport	-	-
Gohir.A07G187732	A07	88910619	88910729	111	GhZFPH4_DAP-vs-GhZFPH4_neg_peak_2707	4.59258	7.274	3.31302	5.32E-08	0.000486385	Distal Intergenic	89072623	89074159	1537	2	Gohir.A07G187732.1	163430	-	-	-	-	-	-	-	-
Gohir.A08G060500	A08	9794547	9794710	164	GhZFPH4_DAP-vs-GhZFPH4_neg_peak_2759	4.59258	7.274	3.31302	5.32E-08	0.000486385	Distal Intergenic	9843164	9844341	1178	1	Gohir.A08G060500.1	-48454	IPR004883	Lateral organ boundaries, LOB	K13945	LOB domain-containing protein 29	-	-	ko01522	Endocrine resistance
Gohir.A08G070362	A08	35821122	35821369	248	GhZFPH4_DAP-vs-GhZFPH4_neg_peak_2868	4.59258	7.274	3.31302	5.32E-08	0.000486385	Distal Intergenic	35799369	35803680	4312	2	Gohir.A08G070362.1	-17442	IPR002866,IPR024942	Maturase MatK|Maturase MatK, N-terminal domain	-	-	GO:0006397,GO:0009507	mRNA processing|chloroplast	-	-
Gohir.A08G087400	A08	34363450	34363694	245	GhZFPH4_DAP-vs-GhZFPH4_neg_peak_2865	4.59258	7.274	3.31302	5.32E-08	0.000486385	Distal Intergenic	34431180	34434559	3380	1	Gohir.A08G087400.1	-67486	IPR001830,IPR003337,IPR006379,IPR023214,IPR036412	Glycosyl transferase, family 20|Trehalose-phosphatase|HAD-superfamily hydrolase, subfamily IIB|HAD superfamily|HAD-like superfamily	K16055	trehalose 6-phosphate synthase/phosphatase [EC:2.4.1.15 3.1.3.12]	GO:0003824,GO:0005992	catalytic activity|trehalose biosynthetic process	ko00500,ko01522	Starch and sucrose metabolism|Endocrine resistance
Gohir.A08G087800	A08	45796658	45796865	208	GhZFPH4_DAP-vs-GhZFPH4_neg_peak_2897	4.59258	7.274	3.31302	5.32E-08	0.000486385	Distal Intergenic	45838479	45841919	3441	2	Gohir.A08G087800.1	45054	IPR001706,IPR021137,IPR037229	Ribosomal protein L35, non-mitochondrial|Ribosomal protein L35|Ribosomal protein L35 superfamily	K02916	large subunit ribosomal protein L35	GO:0003735,GO:0005840,GO:0006412	structural constituent of ribosome|ribosome|translation	ko01522,ko03010	Endocrine resistance|Ribosome
Gohir.A08G096400	A08	52283863	52284053	191	GhZFPH4_DAP-vs-GhZFPH4_neg_peak_2916	4.59258	7.274	3.31302	5.32E-08	0.000486385	Promoter (<=1kb)	52283134	52284300	1167	2	Gohir.A08G096400.1	247	IPR001810,IPR013187,IPR017451,IPR036047	F-box domain|F-box associated domain, type 3|F-box associated interaction domain|F-box-like domain superfamily	-	-	GO:0005515	protein binding	-	-
Gohir.A08G102500	A08	68662517	68662827	311	GhZFPH4_DAP-vs-GhZFPH4_neg_peak_2966	4.59258	7.274	3.31302	5.32E-08	0.000486385	Distal Intergenic	68801214	68805412	4199	2	Gohir.A08G102500.1	142585	IPR011989,IPR012535,IPR016024	Armadillo-like helical|Cell division protein Cdc14|Armadillo-type fold	-	-	-	-	-	-
Gohir.A08G109800	A08	82982291	82982472	182	GhZFPH4_DAP-vs-GhZFPH4_neg_peak_3004	4.59258	7.274	3.31302	5.32E-08	0.000486385	Distal Intergenic	83151478	83152786	1309	1	Gohir.A08G109800.2	-169006	-	-	-	-	-	-	-	-
Gohir.A08G114650	A08	91314406	91314558	153	GhZFPH4_DAP-vs-GhZFPH4_neg_peak_3028	4.59258	7.274	3.31302	5.32E-08	0.000486385	Distal Intergenic	91171046	91192598	21553	1	Gohir.A08G114650.1	143360	IPR003439,IPR013525,IPR013581,IPR027417	ABC transporter-like|ABC-2 type transporter|Plant PDR ABC transporter associated|P-loop containing nucleoside triphosphate hydrolase	-	-	GO:0005524,GO:0016020,GO:0016887	ATP binding|membrane|ATPase activity	-	-
Gohir.A08G169100	A08	114791611	114791796	186	GhZFPH4_DAP-vs-GhZFPH4_neg_peak_3098	4.59258	7.274	3.31302	5.32E-08	0.000486385	Promoter (<=1kb)	114790842	114794499	3658	1	Gohir.A08G169100.3	769	IPR002376,IPR002912,IPR004810,IPR036477	Formyl transferase, N-terminal|ACT domain|Formyltetrahydrofolate deformylase|Formyl transferase, N-terminal domain superfamily	K01433	formyltetrahydrofolate deformylase [EC:3.5.1.10]	GO:0006189,GO:0008864,GO:0009058,GO:0016742	'de novo' IMP biosynthetic process|formyltetrahydrofolate deformylase activity|biosynthetic process|hydroxymethyl-, formyl- and related transferase activity	ko00630,ko00670	Glyoxylate and dicarboxylate metabolism|One carbon pool by folate
Gohir.A08G170000	A08	114954021	114954173	153	GhZFPH4_DAP-vs-GhZFPH4_neg_peak_3099	4.59258	7.274	3.31302	5.32E-08	0.000486385	Distal Intergenic	114973501	114976087	2587	1	Gohir.A08G170000.1	-19328	IPR000620,IPR030184	EamA domain|WAT1-related protein	-	-	GO:0016020,GO:0016021,GO:0022857	membrane|integral component of membrane|transmembrane transporter activity	-	-
Gohir.A09G051300	A09	47069888	47070185	298	GhZFPH4_DAP-vs-GhZFPH4_neg_peak_3396	4.59258	7.274	3.31302	5.32E-08	0.000486385	Distal Intergenic	47032941	47038404	5464	2	Gohir.A09G051300.1	-31484	IPR006966	Peroxin-3	K13336	peroxin-3	GO:0005779,GO:0007031	integral component of peroxisomal membrane|peroxisome organization	ko01522,ko04146	Endocrine resistance|Peroxisome
Gohir.A09G055900	A09	52471857	52471992	136	GhZFPH4_DAP-vs-GhZFPH4_neg_peak_3414	4.59258	7.274	3.31302	5.32E-08	0.000486385	Distal Intergenic	52600295	52603227	2933	1	Gohir.A09G055900.2	-128303	IPR002828,IPR036523	Survival protein SurE-like phosphatase/nucleotidase|SurE-like phosphatase/nucleotidase superfamily	K03787	5'-nucleotidase [EC:3.1.3.5]	GO:0016787	hydrolase activity	ko00230,ko00240,ko00760	Purine metabolism|Pyrimidine metabolism|Nicotinate and nicotinamide metabolism
Gohir.A09G148900	A09	75101492	75101687	196	GhZFPH4_DAP-vs-GhZFPH4_neg_peak_3552	4.59258	7.274	3.31302	5.32E-08	0.000486385	Promoter (1-2kb)	75100420	75103278	2859	2	Gohir.A09G148900.1	1591	IPR001106,IPR005922,IPR008948,IPR023144,IPR024083	Aromatic amino acid lyase|Phenylalanine ammonia-lyase|L-Aspartase-like|Phenylalanine ammonia-lyase, shielding domain superfamily|Fumarase/histidase, N-terminal	K10775	phenylalanine ammonia-lyase [EC:4.3.1.24]	GO:0003824,GO:0005737,GO:0006559,GO:0016841	catalytic activity|cytoplasm|L-phenylalanine catabolic process|ammonia-lyase activity	ko00360,ko00940	Phenylalanine metabolism|Phenylpropanoid biosynthesis
Gohir.A09G150700	A09	75318144	75318247	104	GhZFPH4_DAP-vs-GhZFPH4_neg_peak_3553	4.59258	7.274	3.31302	5.32E-08	0.000486385	Distal Intergenic	75309705	75312779	3075	2	Gohir.A09G150700.1	-5365	IPR013087,IPR033243,IPR036236	Zinc finger C2H2-type|Zinc finger protein JACKDAW|Zinc finger C2H2 superfamily	-	-	GO:0003700	DNA-binding transcription factor activity	-	-
Gohir.A09G175300	A09	77816993	77817151	159	GhZFPH4_DAP-vs-GhZFPH4_neg_peak_3557	4.59258	7.274	3.31302	5.32E-08	0.000486385	Distal Intergenic	77831128	77832234	1107	2	Gohir.A09G175300.1	15083	IPR001005,IPR009057,IPR015495,IPR017930	SANT/Myb domain|Homeobox-like domain superfamily|Myb-like transcription factor|Myb domain	K09422	transcription factor MYB, plant	GO:0003677	DNA binding	ko01522	Endocrine resistance
Gohir.A09G245900	A09	85063587	85063834	248	GhZFPH4_DAP-vs-GhZFPH4_neg_peak_3580	4.59258	7.274	3.31302	5.32E-08	0.000486385	Exon (Gohir.A09G245900.1/Gohir.A09G245900, exon 6 of 10)	85062177	85067784	5608	2	Gohir.A09G245900.1	3950	IPR001487,IPR027353,IPR036427,IPR038336	Bromodomain|NET domain|Bromodomain-like superfamily|NET domain superfamily	-	-	GO:0005515	protein binding	-	-
Gohir.A10G058000	A10	6458255	6458474	220	GhZFPH4_DAP-vs-GhZFPH4_neg_peak_3594	4.59258	7.274	3.31302	5.32E-08	0.000486385	Promoter (2-3kb)	6454026	6455466	1441	2	Gohir.A10G058000.1	-2789	-	-	-	-	-	-	-	-
Gohir.A10G091300	A10	17892546	17892875	330	GhZFPH4_DAP-vs-GhZFPH4_neg_peak_3635	4.59258	7.274	3.31302	5.32E-08	0.000486385	Distal Intergenic	17910637	17913566	2930	1	Gohir.A10G091300.1	-17762	IPR001471,IPR016177,IPR036955	AP2/ERF domain|DNA-binding domain superfamily|AP2/ERF domain superfamily	K09284	AP2-like factor, euAP2 lineage	GO:0003677,GO:0003700,GO:0006355	DNA binding|DNA-binding transcription factor activity|regulation of transcription, DNA-templated	ko01522	Endocrine resistance
Gohir.A10G119200	A10	59691113	59691232	120	GhZFPH4_DAP-vs-GhZFPH4_neg_peak_3789	4.59258	7.274	3.31302	5.32E-08	0.000486385	Distal Intergenic	59322293	59342483	20191	2	Gohir.A10G119200.2	-348630	IPR000048,IPR001609,IPR002710,IPR027417,IPR036961	IQ motif, EF-hand binding site|Myosin head, motor domain|Dilute domain|P-loop containing nucleoside triphosphate hydrolase|Kinesin motor domain superfamily	K10357	myosin V	GO:0003774,GO:0005515,GO:0005524,GO:0016459	motor activity|protein binding|ATP binding|myosin complex	ko01522,ko05130	Endocrine resistance|Pathogenic Escherichia coli infection
Gohir.A10G121200	A10	63462606	63462769	164	GhZFPH4_DAP-vs-GhZFPH4_neg_peak_3797	4.59258	7.274	3.31302	5.32E-08	0.000486385	3' UTR	63462727	63466870	4144	2	Gohir.A10G121200.1	4101	IPR000719,IPR001611,IPR011009,IPR013210,IPR032675	Protein kinase domain|Leucine-rich repeat|Protein kinase-like domain superfamily|Leucine-rich repeat-containing N-terminal, plant-type|Leucine-rich repeat domain superfamily	-	-	GO:0004672,GO:0005515,GO:0005524,GO:0006468	protein kinase activity|protein binding|ATP binding|protein phosphorylation	-	-
Gohir.A10G124100	A10	45862477	45862604	128	GhZFPH4_DAP-vs-GhZFPH4_neg_peak_3737	4.59258	7.274	3.31302	5.32E-08	0.000486385	Distal Intergenic	45945576	45947621	2046	1	Gohir.A10G124100.1	-82972	IPR017395,IPR029058	Chlorophyllase|Alpha/Beta hydrolase fold	K08099	chlorophyllase [EC:3.1.1.14]	GO:0015996,GO:0047746	chlorophyll catabolic process|chlorophyllase activity	ko00860	Porphyrin and chlorophyll metabolism
Gohir.A10G129400	A10	73047740	73048028	289	GhZFPH4_DAP-vs-GhZFPH4_neg_peak_3838	4.59258	7.274	3.31302	5.32E-08	0.000486385	Distal Intergenic	73025136	73029778	4643	2	Gohir.A10G129400.5	-17962	IPR000719,IPR001245,IPR001611,IPR011009,IPR013210,IPR032675	Protein kinase domain|Serine-threonine/tyrosine-protein kinase, catalytic domain|Leucine-rich repeat|Protein kinase-like domain superfamily|Leucine-rich repeat-containing N-terminal, plant-type|Leucine-rich repeat domain superfamily	-	-	GO:0004672,GO:0005515,GO:0005524,GO:0006468	protein kinase activity|protein binding|ATP binding|protein phosphorylation	-	-
Gohir.A10G158400	A10	90172538	90172703	166	GhZFPH4_DAP-vs-GhZFPH4_neg_peak_3895	4.59258	7.274	3.31302	5.32E-08	0.000486385	Distal Intergenic	90191428	90194828	3401	1	Gohir.A10G158400.1	-18725	IPR008889,IPR039611,IPR039829	VQ|VQ motif-containing protein 4/11/13/19/31/33|VQ motif-containing protein 31	-	-	-	-	-	-
Gohir.A10G162500	A10	94865886	94866059	174	GhZFPH4_DAP-vs-GhZFPH4_neg_peak_3918	4.59258	7.274	3.31302	5.32E-08	0.000486385	Distal Intergenic	94886588	94894704	8117	2	Gohir.A10G162500.1	28645	IPR000571,IPR036855	Zinc finger, CCCH-type|Zinc finger, CCCH-type superfamily	-	-	GO:0046872	metal ion binding	-	-
Gohir.A10G173300	A10	101575314	101575547	234	GhZFPH4_DAP-vs-GhZFPH4_neg_peak_3932	4.59258	7.274	3.31302	5.32E-08	0.000486385	Distal Intergenic	101562465	101564075	1611	1	Gohir.A10G173300.1	12849	-	-	-	-	-	-	-	-
Gohir.A10G196600	A10	108906752	108906901	150	GhZFPH4_DAP-vs-GhZFPH4_neg_peak_3954	4.59258	7.274	3.31302	5.32E-08	0.000486385	Promoter (2-3kb)	108904114	108909717	5604	2	Gohir.A10G196600.1	2816	IPR000719,IPR002048,IPR011009,IPR011992	Protein kinase domain|EF-hand domain|Protein kinase-like domain superfamily|EF-hand domain pair	K13412	calcium-dependent protein kinase [EC:2.7.11.1]	GO:0004672,GO:0005509,GO:0005524,GO:0006468	protein kinase activity|calcium ion binding|ATP binding|protein phosphorylation	ko01522,ko04626,ko05145	Endocrine resistance|Plant-pathogen interaction|Toxoplasmosis
Gohir.A10G198050	A10	109182027	109182245	219	GhZFPH4_DAP-vs-GhZFPH4_neg_peak_3957	4.59258	7.274	3.31302	5.32E-08	0.000486385	Distal Intergenic	109187156	109187455	300	1	Gohir.A10G198050.1	-4911	-	-	-	-	-	-	-	-
Gohir.A11G080000	A11	7837097	7837342	246	GhZFPH4_DAP-vs-GhZFPH4_neg_peak_3996	4.59258	7.274	3.31302	5.32E-08	0.000486385	Promoter (<=1kb)	7833843	7836912	3070	2	Gohir.A11G080000.1	-185	IPR006943,IPR040225	Domain of unknown function DUF641, plant|Protein gravitropic in the light 1-like	-	-	GO:0009639,GO:0009959	response to red or far red light|negative gravitropism	-	-
Gohir.A11G175200	A11	24897875	24898261	387	GhZFPH4_DAP-vs-GhZFPH4_neg_peak_4036	4.59258	7.274	3.31302	5.32E-08	0.000486385	Distal Intergenic	24887238	24892194	4957	2	Gohir.A11G175200.2	-5681	IPR000719,IPR002048,IPR011009,IPR011992	Protein kinase domain|EF-hand domain|Protein kinase-like domain superfamily|EF-hand domain pair	K13412	calcium-dependent protein kinase [EC:2.7.11.1]	GO:0004672,GO:0005509,GO:0005524,GO:0006468	protein kinase activity|calcium ion binding|ATP binding|protein phosphorylation	ko01522,ko04626,ko05145	Endocrine resistance|Plant-pathogen interaction|Toxoplasmosis
Gohir.A11G200232	A11	46057354	46057578	225	GhZFPH4_DAP-vs-GhZFPH4_neg_peak_4115	4.59258	7.274	3.31302	5.32E-08	0.000486385	Distal Intergenic	46193768	46194898	1131	1	Gohir.A11G200232.2	-136190	IPR029071,IPR039690,IPR040610	Ubiquitin-like domain superfamily|U11/U12 small nuclear ribonucleoprotein 25kDa protein|SNRNP25, ubiquitin-like domain	K13153	U11/U12 small nuclear ribonucleoprotein 25 kDa protein	GO:0000398,GO:0005689	mRNA splicing, via spliceosome|U12-type spliceosomal complex	ko01522	Endocrine resistance
Gohir.A11G221004	A11	81830445	81830686	242	GhZFPH4_DAP-vs-GhZFPH4_neg_peak_4238	4.59258	7.274	3.31302	5.32E-08	0.000486385	Distal Intergenic	81640937	81644381	3445	1	Gohir.A11G221004.2	189508	IPR006936,IPR040222	ALOG domain|ALOG family	-	-	-	-	-	-
Gohir.A11G226000	A11	84946640	84946809	170	GhZFPH4_DAP-vs-GhZFPH4_neg_peak_4244	4.59258	7.274	3.31302	5.32E-08	0.000486385	Distal Intergenic	84900444	84904416	3973	2	Gohir.A11G226000.1	-42224	IPR034628	Maltose excess protein 1	-	-	-	-	-	-
Gohir.A11G243366	A11	103210960	103211188	229	GhZFPH4_DAP-vs-GhZFPH4_neg_peak_4312	4.59258	7.274	3.31302	5.32E-08	0.000486385	Distal Intergenic	103111152	103113000	1849	2	Gohir.A11G243366.1	-97960	IPR001087,IPR036514	GDSL lipase/esterase|SGNH hydrolase superfamily	-	-	GO:0016788	hydrolase activity, acting on ester bonds	-	-
Gohir.A11G248600	A11	107127235	107127501	267	GhZFPH4_DAP-vs-GhZFPH4_neg_peak_4321	4.59258	7.274	3.31302	5.32E-08	0.000486385	Promoter (1-2kb)	107126558	107129112	2555	2	Gohir.A11G248600.1	1611	IPR007717	Nuclear pore localisation protein NPL4, C-terminal	-	-	-	-	-	-
Gohir.A12G075600	A12	39378966	39379248	283	GhZFPH4_DAP-vs-GhZFPH4_neg_peak_4496	4.59258	7.274	3.31302	5.32E-08	0.000486385	Distal Intergenic	39349922	39352113	2192	1	Gohir.A12G075600.1	29044	IPR000182,IPR016181	GNAT domain|Acyl-CoA N-acyltransferase	-	-	GO:0008080	N-acetyltransferase activity	-	-
Gohir.A12G082400	A12	48580369	48580588	220	GhZFPH4_DAP-vs-GhZFPH4_neg_peak_4524	4.59258	7.274	3.31302	5.32E-08	0.000486385	Distal Intergenic	48744050	48762472	18423	1	Gohir.A12G082400.2	-163462	IPR001567,IPR024077	Peptidase M3A/M3B catalytic domain|Neurolysin/Thimet oligopeptidase, domain 2	K01414	oligopeptidase A [EC:3.4.24.70]	GO:0004222,GO:0006508	metalloendopeptidase activity|proteolysis	ko01522	Endocrine resistance
Gohir.A12G082900	A12	60753943	60754156	214	GhZFPH4_DAP-vs-GhZFPH4_neg_peak_4562	4.59258	7.274	3.31302	5.32E-08	0.000486385	Distal Intergenic	60798120	60800123	2004	2	Gohir.A12G082900.1	45967	IPR000719,IPR001220,IPR011009,IPR013320	Protein kinase domain|Legume lectin domain|Protein kinase-like domain superfamily|Concanavalin A-like lectin/glucanase domain superfamily	-	-	GO:0004672,GO:0005524,GO:0006468,GO:0030246	protein kinase activity|ATP binding|protein phosphorylation|carbohydrate binding	-	-
Gohir.A12G084700	A12	63601130	63601244	115	GhZFPH4_DAP-vs-GhZFPH4_neg_peak_4575	4.59258	7.274	3.31302	5.32E-08	0.000486385	Promoter (2-3kb)	63600504	63603855	3352	2	Gohir.A12G084700.2	2611	IPR000719,IPR001245,IPR011009	Protein kinase domain|Serine-threonine/tyrosine-protein kinase, catalytic domain|Protein kinase-like domain superfamily	-	-	GO:0004672,GO:0005524,GO:0006468	protein kinase activity|ATP binding|protein phosphorylation	-	-
Gohir.A12G093425	A12	72676460	72676578	119	GhZFPH4_DAP-vs-GhZFPH4_neg_peak_4616	4.59258	7.274	3.31302	5.32E-08	0.000486385	Distal Intergenic	72734382	72738591	4210	1	Gohir.A12G093425.1	-57804	IPR027410	TCP-1-like chaperonin intermediate domain superfamily	-	-	-	-	-	-
Gohir.A12G150600	A12	91797366	91797524	159	GhZFPH4_DAP-vs-GhZFPH4_neg_peak_4690	4.59258	7.274	3.31302	5.32E-08	0.000486385	Promoter (1-2kb)	91793613	91798682	5070	2	Gohir.A12G150600.2	1158	IPR027329	TPX2, C-terminal	-	-	-	-	-	-
Gohir.A12G192200	A12	100386715	100387049	335	GhZFPH4_DAP-vs-GhZFPH4_neg_peak_4720	4.59258	7.274	3.31302	5.32E-08	0.000486385	Distal Intergenic	100396827	100398601	1775	2	Gohir.A12G192200.1	11552	IPR004316	SWEET sugar transporter	-	-	GO:0016021	integral component of membrane	ko01522	Endocrine resistance
Gohir.A12G192300	A12	100414040	100414244	205	GhZFPH4_DAP-vs-GhZFPH4_neg_peak_4721	4.59258	7.274	3.31302	5.32E-08	0.000486385	Distal Intergenic	100421562	100423483	1922	2	Gohir.A12G192300.1	9239	IPR004316	SWEET sugar transporter	-	-	GO:0016021	integral component of membrane	ko01522	Endocrine resistance
Gohir.A13G075700	A13	26425263	26425379	117	GhZFPH4_DAP-vs-GhZFPH4_neg_peak_4839	4.59258	7.274	3.31302	5.32E-08	0.000486385	Distal Intergenic	26557696	26559741	2046	2	Gohir.A13G075700.2	134362	IPR000719,IPR001245,IPR011009,IPR024788	Protein kinase domain|Serine-threonine/tyrosine-protein kinase, catalytic domain|Protein kinase-like domain superfamily|Malectin-like domain	-	-	GO:0004672,GO:0005524,GO:0006468	protein kinase activity|ATP binding|protein phosphorylation	-	-
Gohir.A13G083300	A13	30108182	30108318	137	GhZFPH4_DAP-vs-GhZFPH4_neg_peak_4858	4.59258	7.274	3.31302	5.32E-08	0.000486385	Distal Intergenic	30012769	30014889	2121	2	Gohir.A13G083300.1	-93293	IPR001128,IPR002401,IPR036396	Cytochrome P450|Cytochrome P450, E-class, group I|Cytochrome P450 superfamily	K20619	cytochrome P450 family 78 subfamily A	GO:0005506,GO:0016705,GO:0020037,GO:0055114	iron ion binding|oxidoreductase activity, acting on paired donors, with incorporation or reduction of molecular oxygen|heme binding|oxidation-reduction process	ko01522	Endocrine resistance
Gohir.A13G086600	A13	43517469	43517766	298	GhZFPH4_DAP-vs-GhZFPH4_neg_peak_4902	4.59258	7.274	3.31302	5.32E-08	0.000486385	Distal Intergenic	43533860	43536605	2746	1	Gohir.A13G086600.1	-16094	IPR000836,IPR005854,IPR017932,IPR029055,IPR029057	Phosphoribosyltransferase domain|Amidophosphoribosyltransferase|Glutamine amidotransferase type 2 domain|Nucleophile aminohydrolases, N-terminal|Phosphoribosyltransferase-like	K00764	amidophosphoribosyltransferase [EC:2.4.2.14]	GO:0004044,GO:0009113,GO:0009116	amidophosphoribosyltransferase activity|purine nucleobase biosynthetic process|nucleoside metabolic process	ko00230,ko00250,ko01522	Purine metabolism|Alanine, aspartate and glutamate metabolism|Endocrine resistance
Gohir.A13G095700	A13	57115172	57115320	149	GhZFPH4_DAP-vs-GhZFPH4_neg_peak_4960	4.59258	7.274	3.31302	5.32E-08	0.000486385	Distal Intergenic	57241006	57247393	6388	2	Gohir.A13G095700.3	132073	IPR006083,IPR023577,IPR027417,IPR033469	Phosphoribulokinase/uridine kinase|CYTH domain|P-loop containing nucleoside triphosphate hydrolase|CYTH-like domain superfamily	K00876	uridine kinase [EC:2.7.1.48]	GO:0005524,GO:0016301	ATP binding|kinase activity	ko00240,ko00983	Pyrimidine metabolism|Drug metabolism - other enzymes
Gohir.A13G096100	A13	66145558	66145706	149	GhZFPH4_DAP-vs-GhZFPH4_neg_peak_4996	4.59258	7.274	3.31302	5.32E-08	0.000486385	Promoter (2-3kb)	66131849	66143190	11342	2	Gohir.A13G096100.9	-2368	IPR001926,IPR005856,IPR005859,IPR036052	Pyridoxal-phosphate dependent enzyme|Cysteine synthase|Cysteine synthase CysK|Tryptophan synthase beta subunit-like PLP-dependent enzyme	K22846	S-sulfo-L-cysteine synthase (O-acetyl-L-serine-dependent) [EC:2.5.1.144]	GO:0004124,GO:0006535	cysteine synthase activity|cysteine biosynthetic process from serine	ko00270	Cysteine and methionine metabolism
Gohir.A13G106466	A13	73982282	73982580	299	GhZFPH4_DAP-vs-GhZFPH4_neg_peak_5024	4.59258	7.274	3.31302	5.32E-08	0.000486385	Distal Intergenic	73820499	73822828	2330	1	Gohir.A13G106466.1	161783	IPR001005,IPR006447,IPR009057,IPR017930,IPR025756	SANT/Myb domain|Myb domain, plants|Homeobox-like domain superfamily|Myb domain|MYB-CC type transcription factor, LHEQLE-containing domain	-	-	GO:0003677	DNA binding	-	-
Gohir.A13G150600	A13	98170849	98171148	300	GhZFPH4_DAP-vs-GhZFPH4_neg_peak_5100	4.59258	7.274	3.31302	5.32E-08	0.000486385	Distal Intergenic	98116989	98118344	1356	1	Gohir.A13G150600.3	53860	IPR025846,IPR026057,IPR029962	PMR5 N-terminal domain|PC-Esterase|Trichome birefringence-like family	-	-	-	-	-	-
Gohir.A13G162914	A13	102943248	102943494	247	GhZFPH4_DAP-vs-GhZFPH4_neg_peak_5114	4.59258	7.274	3.31302	5.32E-08	0.000486385	Distal Intergenic	102947658	102949118	1461	2	Gohir.A13G162914.1	5624	IPR002129,IPR010977,IPR015421,IPR015422,IPR015424	Pyridoxal phosphate-dependent decarboxylase|Aromatic-L-amino-acid decarboxylase|Pyridoxal phosphate-dependent transferase, major domain|Pyridoxal phosphate-dependent transferase domain 1|Pyridoxal phosphate-dependent transferase	-	-	GO:0003824,GO:0006520,GO:0016831,GO:0019752,GO:0030170	catalytic activity|cellular amino acid metabolic process|carboxy-lyase activity|carboxylic acid metabolic process|pyridoxal phosphate binding	-	-
Gohir.A13G177900	A13	105553594	105553816	223	GhZFPH4_DAP-vs-GhZFPH4_neg_peak_5117	4.59258	7.274	3.31302	5.32E-08	0.000486385	Distal Intergenic	105559222	105563582	4361	1	Gohir.A13G177900.2	-5406	IPR003406	Glycosyl transferase, family 14	-	-	GO:0016020	membrane	-	-
Gohir.A13G205300	A13	108505397	108505529	133	GhZFPH4_DAP-vs-GhZFPH4_neg_peak_5124	4.59258	7.274	3.31302	5.32E-08	0.000486385	Distal Intergenic	108509306	108511189	1884	2	Gohir.A13G205300.1	5660	IPR005123,IPR026992,IPR027443	Oxoglutarate/iron-dependent dioxygenase|Non-haem dioxygenase N-terminal domain|Isopenicillin N synthase-like	-	-	GO:0016491,GO:0055114	oxidoreductase activity|oxidation-reduction process	-	-
Gohir.D01G042748	D01	5836432	5836637	206	GhZFPH4_DAP-vs-GhZFPH4_neg_peak_5154	4.59258	7.274	3.31302	5.32E-08	0.000486385	Distal Intergenic	5825438	5833793	8356	1	Gohir.D01G042748.1	10994	IPR001611,IPR013210,IPR032675	Leucine-rich repeat|Leucine-rich repeat-containing N-terminal, plant-type|Leucine-rich repeat domain superfamily	-	-	GO:0005515	protein binding	-	-
Gohir.D01G052250	D01	7409875	7410048	174	GhZFPH4_DAP-vs-GhZFPH4_neg_peak_5157	4.59258	7.274	3.31302	5.32E-08	0.000486385	Distal Intergenic	7405495	7407677	2183	1	Gohir.D01G052250.1	4380	IPR027417	P-loop containing nucleoside triphosphate hydrolase	-	-	-	-	-	-
Gohir.D01G083200	D01	14265258	14265450	193	GhZFPH4_DAP-vs-GhZFPH4_neg_peak_5175	4.59258	7.274	3.31302	5.32E-08	0.000486385	Promoter (1-2kb)	14264163	14268203	4041	1	Gohir.D01G083200.2	1095	IPR011611,IPR023314,IPR029056	Carbohydrate kinase PfkB|5-Dehydro-2-deoxygluconokinase-like superfamily|Ribokinase-like	-	-	-	-	-	-
Gohir.D01G089600	D01	15879426	15879688	263	GhZFPH4_DAP-vs-GhZFPH4_neg_peak_5178	4.59258	7.274	3.31302	5.32E-08	0.000486385	Promoter (1-2kb)	15878861	15880705	1845	2	Gohir.D01G089600.1	1017	IPR008551	Transport and Golgi organisation protein 2	-	-	-	-	-	-
Gohir.D01G098375	D01	17587887	17588075	189	GhZFPH4_DAP-vs-GhZFPH4_neg_peak_5184	4.59258	7.274	3.31302	5.32E-08	0.000486385	Distal Intergenic	17593872	17595276	1405	1	Gohir.D01G098375.1	-5797	-	-	-	-	-	-	-	-
Gohir.D01G207900	D01	63942955	63943256	302	GhZFPH4_DAP-vs-GhZFPH4_neg_peak_5401	4.59258	7.274	3.31302	5.32E-08	0.000486385	Promoter (2-3kb)	63940643	63941095	453	1	Gohir.D01G207900.1	2312	-	-	-	-	-	-	-	-
Gohir.D02G082633	D02	14122256	14122451	196	GhZFPH4_DAP-vs-GhZFPH4_neg_peak_5443	4.59258	7.274	3.31302	5.32E-08	0.000486385	Distal Intergenic	14127399	14128572	1174	2	Gohir.D02G082633.1	6121	-	-	-	-	-	-	-	-
Gohir.D02G112800	D02	36865531	36865646	116	GhZFPH4_DAP-vs-GhZFPH4_neg_peak_5529	4.59258	7.274	3.31302	5.32E-08	0.000486385	Distal Intergenic	36808436	36815209	6774	2	Gohir.D02G112800.2	-50322	-	-	-	-	-	-	-	-
Gohir.D02G113300	D02	37099986	37100205	220	GhZFPH4_DAP-vs-GhZFPH4_neg_peak_5532	4.59258	7.274	3.31302	5.32E-08	0.000486385	Distal Intergenic	37109546	37118734	9189	1	Gohir.D02G113300.1	-9341	-	-	K14006	protein transport protein SEC23	-	-	ko01522,ko04141	Endocrine resistance|Protein processing in endoplasmic reticulum
Gohir.D02G118600	D02	40794365	40794621	257	GhZFPH4_DAP-vs-GhZFPH4_neg_peak_5556	4.59258	7.274	3.31302	5.32E-08	0.000486385	Distal Intergenic	40778819	40780154	1336	2	Gohir.D02G118600.1	-14211	-	-	-	-	-	-	ko01522	Endocrine resistance
Gohir.D02G119500	D02	41249509	41249861	353	GhZFPH4_DAP-vs-GhZFPH4_neg_peak_5558	4.59258	7.274	3.31302	5.32E-08	0.000486385	Distal Intergenic	41243695	41246413	2719	1	Gohir.D02G119500.1	5814	-	-	-	-	-	-	-	-
Gohir.D02G140800	D02	52798067	52798177	111	GhZFPH4_DAP-vs-GhZFPH4_neg_peak_5609	4.59258	7.274	3.31302	5.32E-08	0.000486385	Distal Intergenic	52767144	52769732	2589	2	Gohir.D02G140800.2	-28335	-	-	-	-	-	-	-	-
Gohir.D02G156600	D02	59298596	59298810	215	GhZFPH4_DAP-vs-GhZFPH4_neg_peak_5642	4.59258	7.274	3.31302	5.32E-08	0.000486385	Distal Intergenic	59279615	59281697	2083	1	Gohir.D02G156600.1	18981	-	-	K15402	fatty acid omega-hydroxylase [EC:1.14.-.-]	-	-	ko00073,ko01522	Cutin, suberine and wax biosynthesis|Endocrine resistance
Gohir.D03G030400	D03	3244548	3244691	144	GhZFPH4_DAP-vs-GhZFPH4_neg_peak_5687	4.59258	7.274	3.31302	5.32E-08	0.000486385	Distal Intergenic	3240378	3241088	711	1	Gohir.D03G030400.1	4170	-	-	-	-	-	-	-	-
Gohir.D03G064500	D03	16168659	16168801	143	GhZFPH4_DAP-vs-GhZFPH4_neg_peak_5716	4.59258	7.274	3.31302	5.32E-08	0.000486385	Distal Intergenic	16124454	16129634	5181	2	Gohir.D03G064500.2	-39025	IPR000245,IPR002379,IPR035921	V-ATPase proteolipid subunit|V-ATPase proteolipid subunit C-like domain|F/V-ATP synthase subunit C superfamily	-	-	GO:0015078,GO:0033177,GO:0033179,GO:1902600	proton transmembrane transporter activity|proton-transporting two-sector ATPase complex, proton-transporting domain|proton-transporting V-type ATPase, V0 domain|proton transmembrane transport	ko00190,ko04142,ko04145,ko04721,ko05110,ko05120,ko05152,ko05323	Oxidative phosphorylation|Lysosome|Phagosome|Synaptic vesicle cycle|Vibrio cholerae infection|Epithelial cell signaling in Helicobacter pylori infection|Tuberculosis|Rheumatoid arthritis
Gohir.D03G109500	D03	43228642	43228805	164	GhZFPH4_DAP-vs-GhZFPH4_neg_peak_5832	4.59258	7.274	3.31302	5.32E-08	0.000486385	Distal Intergenic	43210672	43213996	3325	2	Gohir.D03G109500.1	-14646	IPR000719,IPR011009	Protein kinase domain|Protein kinase-like domain superfamily	-	-	GO:0004672,GO:0005524,GO:0006468	protein kinase activity|ATP binding|protein phosphorylation	-	-
Gohir.D04G014600	D04	2289921	2290107	187	GhZFPH4_DAP-vs-GhZFPH4_neg_peak_5879	4.59258	7.274	3.31302	5.32E-08	0.000486385	Distal Intergenic	2282959	2286305	3347	2	Gohir.D04G014600.2	-3616	IPR017923,IPR035441	Transcription factor IIS, N-terminal|TFIIS/LEDGF domain superfamily	-	-	GO:0005634	nucleus	-	-
Gohir.D04G102200	D04	37007237	37007647	411	GhZFPH4_DAP-vs-GhZFPH4_neg_peak_6012	4.59258	7.274	3.31302	5.32E-08	0.000486385	Promoter (2-3kb)	37006994	37009722	2729	2	Gohir.D04G102200.1	2075	IPR000048	IQ motif, EF-hand binding site	-	-	GO:0005515	protein binding	-	-
Gohir.D04G129300	D04	47737951	47738171	221	GhZFPH4_DAP-vs-GhZFPH4_neg_peak_6047	4.59258	7.274	3.31302	5.32E-08	0.000486385	Distal Intergenic	47759753	47762212	2460	2	Gohir.D04G129300.1	24041	IPR002123,IPR023214,IPR036412	Phospholipid/glycerol acyltransferase|HAD superfamily|HAD-like superfamily	K13508	glycerol-3-phosphate acyltransferase [EC:2.3.1.15 2.3.1.198]	GO:0016746	transferase activity, transferring acyl groups	ko00561,ko00564,ko01522	Glycerolipid metabolism|Glycerophospholipid metabolism|Endocrine resistance
Gohir.D04G172600	D04	55745639	55745798	160	GhZFPH4_DAP-vs-GhZFPH4_neg_peak_6068	4.59258	7.274	3.31302	5.32E-08	0.000486385	Distal Intergenic	55740327	55743459	3133	1	Gohir.D04G172600.1	5312	IPR000719,IPR011009,IPR013210,IPR032675	Protein kinase domain|Protein kinase-like domain superfamily|Leucine-rich repeat-containing N-terminal, plant-type|Leucine-rich repeat domain superfamily	-	-	GO:0004672,GO:0005524,GO:0006468	protein kinase activity|ATP binding|protein phosphorylation	-	-
Gohir.D05G050050	D05	4072275	4072400	126	GhZFPH4_DAP-vs-GhZFPH4_neg_peak_6081	4.59258	7.274	3.31302	5.32E-08	0.000486385	Promoter (<=1kb)	4072766	4073832	1067	1	Gohir.D05G050050.1	-366	-	-	-	-	-	-	-	-
Gohir.D05G336751	D05	54468370	54468621	252	GhZFPH4_DAP-vs-GhZFPH4_neg_peak_6227	4.59258	7.274	3.31302	5.32E-08	0.000486385	Promoter (<=1kb)	54468876	54469178	303	2	Gohir.D05G336751.1	557	-	-	-	-	-	-	-	-
Gohir.D05G350000	D05	58858720	58858862	143	GhZFPH4_DAP-vs-GhZFPH4_neg_peak_6240	4.59258	7.274	3.31302	5.32E-08	0.000486385	Promoter (1-2kb)	58856513	58860140	3628	2	Gohir.D05G350000.1	1278	-	-	-	-	-	-	ko04626	Plant-pathogen interaction
Gohir.D05G355900	D05	60041944	60042127	184	GhZFPH4_DAP-vs-GhZFPH4_neg_peak_6246	4.59258	7.274	3.31302	5.32E-08	0.000486385	Intron (Gohir.D05G355900.1/Gohir.D05G355900, intron 3 of 6)	60038169	60046144	7976	1	Gohir.D05G355900.1	3775	-	-	-	-	-	-	-	-
Gohir.D05G385200	D05	66075082	66075334	253	GhZFPH4_DAP-vs-GhZFPH4_neg_peak_6264	4.59258	7.274	3.31302	5.32E-08	0.000486385	Distal Intergenic	66069274	66072562	3289	1	Gohir.D05G385200.1	5808	-	-	-	-	-	-	-	-
Gohir.D06G061000	D06	10614741	10614972	232	GhZFPH4_DAP-vs-GhZFPH4_neg_peak_6313	4.59258	7.274	3.31302	5.32E-08	0.000486385	Distal Intergenic	10578978	10581880	2903	1	Gohir.D06G061000.1	35763	IPR020946,IPR036188	Flavin monooxygenase-like|FAD/NAD(P)-binding domain superfamily	K11816	indole-3-pyruvate monooxygenase [EC:1.14.13.168]	GO:0004499,GO:0050660,GO:0050661,GO:0055114	N,N-dimethylaniline monooxygenase activity|flavin adenine dinucleotide binding|NADP binding|oxidation-reduction process	ko00380	Tryptophan metabolism
Gohir.D06G061833	D06	11004265	11004540	276	GhZFPH4_DAP-vs-GhZFPH4_neg_peak_6317	4.59258	7.274	3.31302	5.32E-08	0.000486385	Promoter (<=1kb)	11004229	11005138	910	2	Gohir.D06G061833.1	598	-	-	-	-	-	-	-	-
Gohir.D06G080100	D06	16122214	16122378	165	GhZFPH4_DAP-vs-GhZFPH4_neg_peak_6335	4.59258	7.274	3.31302	5.32E-08	0.000486385	Exon (Gohir.D06G080100.1/Gohir.D06G080100, exon 10 of 12)	16121004	16126478	5475	2	Gohir.D06G080100.1	4100	IPR002225,IPR003388,IPR036291	3-beta hydroxysteroid dehydrogenase/isomerase|Reticulon|NAD(P)-binding domain superfamily	K23558	plant 3beta-hydroxysteroid-4alpha-carboxylate 3-dehydrogenase [EC:1.1.1.418]	GO:0003854,GO:0006694,GO:0016616,GO:0055114	3-beta-hydroxy-delta5-steroid dehydrogenase activity|steroid biosynthetic process|oxidoreductase activity, acting on the CH-OH group of donors, NAD or NADP as acceptor|oxidation-reduction process	ko00100	Steroid biosynthesis
Gohir.D06G092733	D06	21033489	21033657	169	GhZFPH4_DAP-vs-GhZFPH4_neg_peak_6352	4.59258	7.274	3.31302	5.32E-08	0.000486385	Distal Intergenic	21030058	21032323	2266	1	Gohir.D06G092733.1	3431	IPR003656,IPR008906,IPR012337,IPR025525,IPR036236	Zinc finger, BED-type|HAT, C-terminal dimerisation domain|Ribonuclease H-like superfamily|hAT-like transposase, RNase-H fold|Zinc finger C2H2 superfamily	-	-	GO:0003677,GO:0046983	DNA binding|protein dimerization activity	-	-
Gohir.D06G127600	D06	43044766	43044997	232	GhZFPH4_DAP-vs-GhZFPH4_neg_peak_6424	4.59258	7.274	3.31302	5.32E-08	0.000486385	Promoter (2-3kb)	43040558	43041897	1340	2	Gohir.D06G127600.1	-2869	IPR001005,IPR009057,IPR015495,IPR017930	SANT/Myb domain|Homeobox-like domain superfamily|Myb-like transcription factor|Myb domain	K09422	transcription factor MYB, plant	GO:0003677	DNA binding	ko01522	Endocrine resistance
Gohir.D06G164016	D06	58737358	58737652	295	GhZFPH4_DAP-vs-GhZFPH4_neg_peak_6469	4.59258	7.274	3.31302	5.32E-08	0.000486385	Distal Intergenic	58719033	58726733	7701	1	Gohir.D06G164016.1	18325	IPR006694,IPR021940	Fatty acid hydroxylase|Uncharacterised domain Wax2, C-terminal	K15404	aldehyde decarbonylase [EC:4.1.99.5]	GO:0005506,GO:0008610,GO:0016491,GO:0055114	iron ion binding|lipid biosynthetic process|oxidoreductase activity|oxidation-reduction process	ko00073	Cutin, suberine and wax biosynthesis
Gohir.D07G098800	D07	12741218	12741797	580	GhZFPH4_DAP-vs-GhZFPH4_neg_peak_6524	4.59258	7.274	3.31302	5.32E-08	0.000486385	Promoter (<=1kb)	12738740	12742087	3348	2	Gohir.D07G098800.1	290	IPR000778,IPR013112,IPR013121,IPR013130,IPR017927,IPR017938,IPR039261	Cytochrome b245, heavy chain|FAD-binding 8|Ferric reductase, NAD binding domain|Ferric reductase transmembrane component-like domain|FAD-binding domain, ferredoxin reductase-type|Riboflavin synthase-like beta-barrel|Ferredoxin-NADP reductase (FNR), nucleotide-binding domain	-	-	GO:0016020,GO:0016491,GO:0055114	membrane|oxidoreductase activity|oxidation-reduction process	-	-
Gohir.D07G101600	D07	13470021	13470207	187	GhZFPH4_DAP-vs-GhZFPH4_neg_peak_6526	4.59258	7.274	3.31302	5.32E-08	0.000486385	Distal Intergenic	13484755	13489423	4669	2	Gohir.D07G101600.1	19216	IPR000225,IPR003613,IPR011989,IPR013083,IPR016024,IPR036537	Armadillo|U box domain|Armadillo-like helical|Zinc finger, RING/FYVE/PHD-type|Armadillo-type fold|Adaptor protein Cbl, N-terminal domain superfamily	-	-	GO:0004842,GO:0005515,GO:0007166,GO:0016567	ubiquitin-protein transferase activity|protein binding|cell surface receptor signaling pathway|protein ubiquitination	-	-
Gohir.D07G139851	D07	22322791	22323187	397	GhZFPH4_DAP-vs-GhZFPH4_neg_peak_6540	4.59258	7.274	3.31302	5.32E-08	0.000486385	Distal Intergenic	22347980	22349986	2007	1	Gohir.D07G139851.1	-24793	-	-	-	-	-	-	-	-
Gohir.D07G170275	D07	34528091	34528232	142	GhZFPH4_DAP-vs-GhZFPH4_neg_peak_6621	4.59258	7.274	3.31302	5.32E-08	0.000486385	Distal Intergenic	34524367	34524915	549	1	Gohir.D07G170275.1	3724	IPR001584,IPR012337,IPR036397	Integrase, catalytic core|Ribonuclease H-like superfamily|Ribonuclease H superfamily	-	-	GO:0003676,GO:0015074	nucleic acid binding|DNA integration	-	-
Gohir.D07G173701	D07	36619761	36619998	238	GhZFPH4_DAP-vs-GhZFPH4_neg_peak_6629	4.59258	7.274	3.31302	5.32E-08	0.000486385	Distal Intergenic	36639893	36641770	1878	1	Gohir.D07G173701.1	-19895	-	-	-	-	-	-	-	-
Gohir.D07G180900	D07	45749209	45749541	333	GhZFPH4_DAP-vs-GhZFPH4_neg_peak_6660	4.59258	7.274	3.31302	5.32E-08	0.000486385	Distal Intergenic	45771171	45772256	1086	1	Gohir.D07G180900.1	-21630	IPR000894,IPR024680,IPR024681,IPR036385	Ribulose bisphosphate carboxylase small chain, domain|Ribulose-1,5-bisphosphate carboxylase small subunit, N-terminal|Ribulose bisphosphate carboxylase, small chain|Ribulose bisphosphate carboxylase, small subunit superfamily	K01602	ribulose-bisphosphate carboxylase small chain [EC:4.1.1.39]	-	-	ko00630,ko00710	Glyoxylate and dicarboxylate metabolism|Carbon fixation in photosynthetic organisms
Gohir.D07G199451	D07	53013162	53013279	118	GhZFPH4_DAP-vs-GhZFPH4_neg_peak_6681	4.59258	7.274	3.31302	5.32E-08	0.000486385	Distal Intergenic	53006803	53009853	3051	2	Gohir.D07G199451.1	-3309	IPR001611,IPR013210,IPR032675	Leucine-rich repeat|Leucine-rich repeat-containing N-terminal, plant-type|Leucine-rich repeat domain superfamily	-	-	GO:0005515	protein binding	-	-
Gohir.D08G106900	D08	30522395	30522603	209	GhZFPH4_DAP-vs-GhZFPH4_neg_peak_6814	4.59258	7.274	3.31302	5.32E-08	0.000486385	Distal Intergenic	30400873	30402292	1420	2	Gohir.D08G106900.1	-120103	IPR001841,IPR013083	Zinc finger, RING-type|Zinc finger, RING/FYVE/PHD-type	-	-	-	-	-	-
Gohir.D08G107800	D08	32382417	32382646	230	GhZFPH4_DAP-vs-GhZFPH4_neg_peak_6822	4.59258	7.274	3.31302	5.32E-08	0.000486385	Distal Intergenic	32367953	32370910	2958	1	Gohir.D08G107800.3	14464	IPR001932,IPR015655,IPR036457	PPM-type phosphatase domain|Protein phosphatase 2C family|PPM-type phosphatase domain superfamily	K17506	protein phosphatase 1L [EC:3.1.3.16]	GO:0003824,GO:0004722,GO:0006470	catalytic activity|protein serine/threonine phosphatase activity|protein dephosphorylation	ko01522	Endocrine resistance
Gohir.D08G124100	D08	41176242	41176654	413	GhZFPH4_DAP-vs-GhZFPH4_neg_peak_6878	4.59258	7.274	3.31302	5.32E-08	0.000486385	Promoter (2-3kb)	41173886	41178289	4404	1	Gohir.D08G124100.4	2356	IPR007203	ORMDL family	-	-	GO:0005789,GO:0016021	endoplasmic reticulum membrane|integral component of membrane	-	-
Gohir.D08G158401	D08	52008599	52008731	133	GhZFPH4_DAP-vs-GhZFPH4_neg_peak_6941	4.59258	7.274	3.31302	5.32E-08	0.000486385	Distal Intergenic	52019249	52021034	1786	2	Gohir.D08G158401.1	12303	IPR001278,IPR014729,IPR035684	Arginine-tRNA ligase|Rossmann-like alpha/beta/alpha sandwich fold|Arginyl-tRNA synthetase, catalytic core domain	-	-	GO:0004814,GO:0005524,GO:0006420	arginine-tRNA ligase activity|ATP binding|arginyl-tRNA aminoacylation	-	-
Gohir.D08G161950	D08	52931886	52931998	113	GhZFPH4_DAP-vs-GhZFPH4_neg_peak_6943	4.59258	7.274	3.31302	5.32E-08	0.000486385	Distal Intergenic	52950781	52952416	1636	2	Gohir.D08G161950.1	20418	-	-	-	-	-	-	-	-
Gohir.D08G200000	D08	60931241	60931530	290	GhZFPH4_DAP-vs-GhZFPH4_neg_peak_6967	4.59258	7.274	3.31302	5.32E-08	0.000486385	Distal Intergenic	60955320	60961461	6142	1	Gohir.D08G200000.1	-23790	IPR001757,IPR006121,IPR006122,IPR008250,IPR023214,IPR023298,IPR023299,IPR027256,IPR036163,IPR036412	P-type ATPase|Heavy metal-associated domain, HMA|Heavy metal-associated domain, copper ion-binding|P-type ATPase, A domain superfamily|HAD superfamily|P-type ATPase, transmembrane domain superfamily|P-type ATPase, cytoplasmic domain N|P-type ATPase, subfamily IB|Heavy metal-associated domain superfamily|HAD-like superfamily	K17686	P-type Cu+ transporter [EC:7.2.2.8]	GO:0000166,GO:0005507,GO:0006812,GO:0016021,GO:0019829,GO:0030001,GO:0046872	nucleotide binding|copper ion binding|cation transport|integral component of membrane|ATPase-coupled cation transmembrane transporter activity|metal ion transport|metal ion binding	ko01524,ko04016	Platinum drug resistance|MAPK signaling pathway - plant
Gohir.D08G201050	D08	61079739	61079874	136	GhZFPH4_DAP-vs-GhZFPH4_neg_peak_6968	4.59258	7.274	3.31302	5.32E-08	0.000486385	Distal Intergenic	61068174	61072853	4680	2	Gohir.D08G201050.1	-6886	-	-	-	-	-	-	-	-
Gohir.D08G246000	D08	66857463	66857876	414	GhZFPH4_DAP-vs-GhZFPH4_neg_peak_6981	4.59258	7.274	3.31302	5.32E-08	0.000486385	Promoter (2-3kb)	66855040	66858928	3889	1	Gohir.D08G246000.1	2423	IPR000717,IPR036388,IPR036390,IPR040134,IPR040896	Proteasome component (PCI) domain|Winged helix-like DNA-binding domain superfamily|Winged helix DNA-binding domain superfamily|26S Proteasome non-ATPase regulatory subunit 12/COP9 signalosome complex subunit 4|26S proteasome regulatory subunit RPN5, C-terminal domain	K03035	26S proteasome regulatory subunit N5	-	-	ko01522,ko03050,ko05169	Endocrine resistance|Proteasome|Epstein-Barr virus infection
Gohir.D09G026450	D09	8338405	8338588	184	GhZFPH4_DAP-vs-GhZFPH4_neg_peak_7014	4.59258	7.274	3.31302	5.32E-08	0.000486385	Distal Intergenic	8320774	8322936	2163	1	Gohir.D09G026450.1	17631	-	-	-	-	-	-	-	-
Gohir.D09G058750	D09	30798360	30798523	164	GhZFPH4_DAP-vs-GhZFPH4_neg_peak_7084	4.59258	7.274	3.31302	5.32E-08	0.000486385	Distal Intergenic	30794597	30796392	1796	1	Gohir.D09G058750.1	3763	IPR000648	Oxysterol-binding protein	-	-	-	-	-	-
Gohir.D09G130001	D09	43132090	43132241	152	GhZFPH4_DAP-vs-GhZFPH4_neg_peak_7116	4.59258	7.274	3.31302	5.32E-08	0.000486385	Promoter (<=1kb)	43131550	43132383	834	2	Gohir.D09G130001.1	142	IPR011989,IPR016024	Armadillo-like helical|Armadillo-type fold	-	-	-	-	-	-
Gohir.D09G250300	D09	54441721	54441906	186	GhZFPH4_DAP-vs-GhZFPH4_neg_peak_7145	4.59258	7.274	3.31302	5.32E-08	0.000486385	Promoter (<=1kb)	54438831	54441252	2422	2	Gohir.D09G250300.3	-469	-	-	-	-	-	-	-	-
Gohir.D10G013700	D10	1149025	1149337	313	GhZFPH4_DAP-vs-GhZFPH4_neg_peak_7148	4.59258	7.274	3.31302	5.32E-08	0.000486385	Promoter (2-3kb)	1143311	1146578	3268	2	Gohir.D10G013700.1	-2447	-	-	-	-	-	-	-	-
Gohir.D10G033400	D10	2927550	2927915	366	GhZFPH4_DAP-vs-GhZFPH4_neg_peak_7153	4.59258	7.274	3.31302	5.32E-08	0.000486385	Promoter (<=1kb)	2927191	2927646	456	2	Gohir.D10G033400.1	0	-	-	-	-	-	-	-	-
Gohir.D10G077200	D10	9138411	9138596	186	GhZFPH4_DAP-vs-GhZFPH4_neg_peak_7170	4.59258	7.274	3.31302	5.32E-08	0.000486385	Promoter (2-3kb)	9136391	9139643	3253	1	Gohir.D10G077200.5	2020	-	-	-	-	-	-	-	-
Gohir.D10G098200	D10	13555018	13555304	287	GhZFPH4_DAP-vs-GhZFPH4_neg_peak_7178	4.59258	7.274	3.31302	5.32E-08	0.000486385	Distal Intergenic	13541488	13545058	3571	2	Gohir.D10G098200.3	-9960	-	-	-	-	-	-	-	-
Gohir.D10G131900	D10	24446539	24446727	189	GhZFPH4_DAP-vs-GhZFPH4_neg_peak_7222	4.59258	7.274	3.31302	5.32E-08	0.000486385	Promoter (<=1kb)	24445665	24454956	9292	1	Gohir.D10G131900.1	874	-	-	K01649	2-isopropylmalate synthase [EC:2.3.3.13]	-	-	ko00290,ko00620	Valine, leucine and isoleucine biosynthesis|Pyruvate metabolism
Gohir.D10G152966	D10	38658849	38659023	175	GhZFPH4_DAP-vs-GhZFPH4_neg_peak_7263	4.59258	7.274	3.31302	5.32E-08	0.000486385	Distal Intergenic	38641605	38643919	2315	1	Gohir.D10G152966.1	17244	-	-	-	-	-	-	-	-
Gohir.D10G154300	D10	42120792	42120972	181	GhZFPH4_DAP-vs-GhZFPH4_neg_peak_7270	4.59258	7.274	3.31302	5.32E-08	0.000486385	Distal Intergenic	42150019	42152248	2230	2	Gohir.D10G154300.1	31276	-	-	-	-	-	-	-	-
Gohir.D10G156800	D10	43281458	43281684	227	GhZFPH4_DAP-vs-GhZFPH4_neg_peak_7275	4.59258	7.274	3.31302	5.32E-08	0.000486385	Distal Intergenic	43359595	43364032	4438	1	Gohir.D10G156800.1	-77911	-	-	-	-	-	-	-	-
Gohir.D11G059600	D11	5101821	5102068	248	GhZFPH4_DAP-vs-GhZFPH4_neg_peak_7358	4.59258	7.274	3.31302	5.32E-08	0.000486385	Promoter (1-2kb)	5103547	5106645	3099	1	Gohir.D11G059600.5	-1479	-	-	K22848	diacylglycerol O-acyltransferase 2, plant [EC:2.3.1.20]	GO:0016747	transferase activity, transferring acyl groups other than amino-acyl groups	ko00561	Glycerolipid metabolism
Gohir.D11G218700	D11	33319250	33319551	302	GhZFPH4_DAP-vs-GhZFPH4_neg_peak_7453	4.59258	7.274	3.31302	5.32E-08	0.000486385	Promoter (1-2kb)	33321394	33323451	2058	1	Gohir.D11G218700.1	-1843	-	-	K09338	homeobox-leucine zipper protein	GO:0003677,GO:0006355,GO:0043565	DNA binding|regulation of transcription, DNA-templated|sequence-specific DNA binding	ko01522	Endocrine resistance
Gohir.D11G233540	D11	42363891	42364042	152	GhZFPH4_DAP-vs-GhZFPH4_neg_peak_7476	4.59258	7.274	3.31302	5.32E-08	0.000486385	Distal Intergenic	42358970	42362171	3202	1	Gohir.D11G233540.1	4921	-	-	-	-	GO:0003899,GO:0006351,GO:0046983	DNA-directed 5'-3' RNA polymerase activity|transcription, DNA-templated|protein dimerization activity	-	-
Gohir.D11G286700	D11	62809869	62810106	238	GhZFPH4_DAP-vs-GhZFPH4_neg_peak_7545	4.59258	7.274	3.31302	5.32E-08	0.000486385	Promoter (2-3kb)	62807673	62811967	4295	1	Gohir.D11G286700.1	2196	-	-	K14945	protein quaking	GO:0003723	RNA binding	ko01522	Endocrine resistance
Gohir.D11G317100	D11	68914195	68914314	120	GhZFPH4_DAP-vs-GhZFPH4_neg_peak_7568	4.59258	7.274	3.31302	5.32E-08	0.000486385	Distal Intergenic	68928115	68936571	8457	1	Gohir.D11G317100.1	-13801	-	-	-	-	GO:0005515,GO:0007165,GO:0043531	protein binding|signal transduction|ADP binding	-	-
Gohir.D12G053500	D12	9294401	9294596	196	GhZFPH4_DAP-vs-GhZFPH4_neg_peak_7610	4.59258	7.274	3.31302	5.32E-08	0.000486385	Distal Intergenic	9302706	9303572	867	2	Gohir.D12G053500.1	8976	-	-	-	-	-	-	-	-
Gohir.D12G071001	D12	30416855	30417018	164	GhZFPH4_DAP-vs-GhZFPH4_neg_peak_7679	4.59258	7.274	3.31302	5.32E-08	0.000486385	Distal Intergenic	30408928	30412044	3117	1	Gohir.D12G071001.1	7927	-	-	-	-	-	-	-	-
Gohir.D12G072100	D12	29959692	29960046	355	GhZFPH4_DAP-vs-GhZFPH4_neg_peak_7676	4.59258	7.274	3.31302	5.32E-08	0.000486385	Promoter (2-3kb)	29962936	29965553	2618	1	Gohir.D12G072100.1	-2890	-	-	-	-	-	-	-	-
Gohir.D12G078000	D12	25852497	25852666	170	GhZFPH4_DAP-vs-GhZFPH4_neg_peak_7658	4.59258	7.274	3.31302	5.32E-08	0.000486385	Distal Intergenic	25837049	25839262	2214	2	Gohir.D12G078000.1	-13235	-	-	K08235	xyloglucan:xyloglucosyl transferase [EC:2.4.1.207]	-	-	ko01522	Endocrine resistance
Gohir.D12G105000	D12	39090633	39090791	159	GhZFPH4_DAP-vs-GhZFPH4_neg_peak_7705	4.59258	7.274	3.31302	5.32E-08	0.000486385	Distal Intergenic	39082842	39085274	2433	2	Gohir.D12G105000.1	-5359	-	-	K21994	LOB domain-containing protein 18	-	-	ko01522	Endocrine resistance
Gohir.D12G115700	D12	41065264	41065553	290	GhZFPH4_DAP-vs-GhZFPH4_neg_peak_7716	4.59258	7.274	3.31302	5.32E-08	0.000486385	Promoter (1-2kb)	41063711	41077526	13816	1	Gohir.D12G115700.2	1553	-	-	K03255	protein TIF31	-	-	ko01522	Endocrine resistance
Gohir.D12G175800	D12	51932061	51932262	202	GhZFPH4_DAP-vs-GhZFPH4_neg_peak_7738	4.59258	7.274	3.31302	5.32E-08	0.000486385	Exon (Gohir.D12G175800.1/Gohir.D12G175800, exon 9 of 14)	51928624	51934141	5518	1	Gohir.D12G175800.1	3437	-	-	-	-	-	-	-	-
Gohir.D12G179600	D12	52716282	52716436	155	GhZFPH4_DAP-vs-GhZFPH4_neg_peak_7739	4.59258	7.274	3.31302	5.32E-08	0.000486385	Promoter (2-3kb)	52711598	52713994	2397	2	Gohir.D12G179600.1	-2288	-	-	-	-	-	-	-	-
Gohir.D12G220500	D12	57608755	57608927	173	GhZFPH4_DAP-vs-GhZFPH4_neg_peak_7757	4.59258	7.274	3.31302	5.32E-08	0.000486385	Distal Intergenic	57615187	57615681	495	2	Gohir.D12G220500.1	6754	-	-	-	-	-	-	ko04075	Plant hormone signal transduction
Gohir.D12G242100	D12	59880296	59880493	198	GhZFPH4_DAP-vs-GhZFPH4_neg_peak_7762	4.59258	7.274	3.31302	5.32E-08	0.000486385	Promoter (<=1kb)	59881266	59882581	1316	1	Gohir.D12G242100.1	-773	-	-	-	-	-	-	-	-
Gohir.D13G005600	D13	559385	559609	225	GhZFPH4_DAP-vs-GhZFPH4_neg_peak_7772	4.59258	7.274	3.31302	5.32E-08	0.000486385	Promoter (2-3kb)	553581	556573	2993	2	Gohir.D13G005600.1	-2812	-	-	-	-	GO:0003924,GO:0005525	GTPase activity|GTP binding	-	-
Gohir.D13G091100	D13	21311688	21311834	147	GhZFPH4_DAP-vs-GhZFPH4_neg_peak_7834	4.59258	7.274	3.31302	5.32E-08	0.000486385	Distal Intergenic	21237540	21240833	3294	1	Gohir.D13G091100.1	74148	-	-	K15177	RNA polymerase-associated protein LEO1	GO:0006368,GO:0016570,GO:0016593	transcription elongation from RNA polymerase II promoter|histone modification|Cdc73/Paf1 complex	ko01522	Endocrine resistance
Gohir.D13G094700	D13	25065403	25065563	161	GhZFPH4_DAP-vs-GhZFPH4_neg_peak_7842	4.59258	7.274	3.31302	5.32E-08	0.000486385	Distal Intergenic	25071159	25082620	11462	2	Gohir.D13G094700.1	17057	-	-	-	-	GO:0005515	protein binding	-	-
Gohir.D13G099300	D13	29565328	29565707	380	GhZFPH4_DAP-vs-GhZFPH4_neg_peak_7860	4.59258	7.274	3.31302	5.32E-08	0.000486385	Distal Intergenic	28883754	28887438	3685	1	Gohir.D13G099300.5	681574	-	-	-	-	GO:0008080	N-acetyltransferase activity	-	-
Gohir.D13G108066	D13	36263335	36263518	184	GhZFPH4_DAP-vs-GhZFPH4_neg_peak_7889	4.59258	7.274	3.31302	5.32E-08	0.000486385	Promoter (<=1kb)	36262859	36263622	764	1	Gohir.D13G108066.1	476	-	-	-	-	GO:0016702,GO:0046872,GO:0055114	oxidoreductase activity, acting on single donors with incorporation of molecular oxygen, incorporation of two atoms of oxygen|metal ion binding|oxidation-reduction process	-	-
Gohir.D13G147100	D13	51145448	51145644	197	GhZFPH4_DAP-vs-GhZFPH4_neg_peak_7944	4.59258	7.274	3.31302	5.32E-08	0.000486385	Promoter (1-2kb)	51144472	51147205	2734	2	Gohir.D13G147100.1	1561	-	-	K14183	(+)-delta-cadinene synthase [EC:4.2.3.13]	GO:0000287,GO:0010333,GO:0016829	magnesium ion binding|terpene synthase activity|lyase activity	ko00909	Sesquiterpenoid and triterpenoid biosynthesis
Gohir.A07G179000	A07	58573745	58574113	369	GhZFPH4_DAP-vs-GhZFPH4_neg_peak_2567	4.58705	8.30175	4.2676	4.99E-09	5.40E-05	Distal Intergenic	58788107	58789671	1565	1	Gohir.A07G179000.2	-213994	IPR001344,IPR022796,IPR023329	Chlorophyll A-B binding protein, plant|Chlorophyll A-B binding protein|Chlorophyll a/b binding domain superfamily	K08913	light-harvesting complex II chlorophyll a/b binding protein 2	GO:0009765,GO:0016020	photosynthesis, light harvesting|membrane	ko00196,ko01522	Photosynthesis - antenna proteins|Endocrine resistance
Gohir.D04G134100	D04	49186512	49186654	143	GhZFPH4_DAP-vs-GhZFPH4_neg_peak_6052	4.58705	8.30175	4.2676	4.99E-09	5.40E-05	Distal Intergenic	49192320	49194532	2213	2	Gohir.D04G134100.1	7878	IPR001005,IPR006447,IPR009057,IPR017930	SANT/Myb domain|Myb domain, plants|Homeobox-like domain superfamily|Myb domain	-	-	GO:0003677	DNA binding	-	-
Gohir.A01G150154	A01	80810405	80810634	230	GhZFPH4_DAP-vs-GhZFPH4_neg_peak_298	4.58519	7.26156	3.30789	5.48E-08	0.000492164	Distal Intergenic	80614434	80616116	1683	1	Gohir.A01G150154.1	195971	IPR038931	Probable NAD(P)H dehydrogenase subunit CRR3, chloroplastic	-	-	GO:0009535,GO:0009773,GO:0010598	chloroplast thylakoid membrane|photosynthetic electron transport in photosystem I|NAD(P)H dehydrogenase complex (plastoquinone)	-	-
Gohir.A02G099002	A02	45008907	45009085	179	GhZFPH4_DAP-vs-GhZFPH4_neg_peak_591	4.58519	7.26156	3.30789	5.48E-08	0.000492164	Distal Intergenic	44891495	44891821	327	1	Gohir.A02G099002.1	117412	-	-	-	-	-	-	-	-
Gohir.A03G072300	A03	45394961	45395141	181	GhZFPH4_DAP-vs-GhZFPH4_neg_peak_998	4.58519	7.26156	3.30789	5.48E-08	0.000492164	Distal Intergenic	45417462	45422827	5366	2	Gohir.A03G072300.1	27686	IPR027417	P-loop containing nucleoside triphosphate hydrolase	-	-	-	-	-	-
Gohir.A13G100000	A13	68237403	68237644	242	GhZFPH4_DAP-vs-GhZFPH4_neg_peak_5008	4.58281	7.62211	3.63645	2.39E-08	0.000230967	Distal Intergenic	68264139	68266302	2164	2	Gohir.A13G100000.2	28658	IPR013989	Development/cell death domain	-	-	-	-	-	-
Gohir.A09G040300	A09	25452988	25453099	112	GhZFPH4_DAP-vs-GhZFPH4_neg_peak_3265	4.57414	8.64892	4.59305	2.24E-09	2.55E-05	Distal Intergenic	25331461	25334848	3388	2	Gohir.A09G040300.2	-118140	IPR007527,IPR018289,IPR031052,IPR004330	Zinc finger, SWIM-type|MULE transposase domain|FHY3/FAR1 family|FAR1 DNA binding domain	-	-	GO:0006355,GO:0008270	regulation of transcription, DNA-templated|zinc ion binding	-	-
Gohir.A11G311600	A11	121836988	121837416	429	GhZFPH4_DAP-vs-GhZFPH4_neg_peak_4354	4.57414	8.64892	4.59305	2.24E-09	2.55E-05	Distal Intergenic	121830049	121830711	663	1	Gohir.A11G311600.1	6939	IPR040389	Cyclin-dependent protein kinase inhibitor SMR	-	-	GO:0032875	regulation of DNA endoreduplication	-	-
Gohir.A03G148200	A03	103347051	103347334	284	GhZFPH4_DAP-vs-GhZFPH4_neg_peak_1194	4.57015	7.23622	3.28416	5.80E-08	0.000519804	Promoter (1-2kb)	103349024	103349245	222	1	Gohir.A03G148200.1	-1690	IPR008801	Rapid ALkalinization Factor	-	-	-	-	-	-
Gohir.A08G094424	A08	56763747	56763890	144	GhZFPH4_DAP-vs-GhZFPH4_neg_peak_2930	4.57015	7.23622	3.28416	5.80E-08	0.000519804	Distal Intergenic	56566461	56568463	2003	1	Gohir.A08G094424.1	197286	IPR000490,IPR017853	Glycoside hydrolase family 17|Glycoside hydrolase superfamily	-	-	GO:0004553,GO:0005975	hydrolase activity, hydrolyzing O-glycosyl compounds|carbohydrate metabolic process	-	-
Gohir.A12G093850	A12	75136997	75137100	104	GhZFPH4_DAP-vs-GhZFPH4_neg_peak_4634	4.57015	7.23622	3.28416	5.80E-08	0.000519804	Distal Intergenic	75047347	75048297	951	2	Gohir.A12G093850.1	-88700	IPR003690,IPR038538	Transcription termination factor, mitochondrial/chloroplastic|MTERF superfamily, mitochondrial/chloroplastic	K15032	mTERF domain-containing protein, mitochondrial	GO:0003690,GO:0006355	double-stranded DNA binding|regulation of transcription, DNA-templated	ko01522	Endocrine resistance
Gohir.A04G065400	A04	56338576	56338713	138	GhZFPH4_DAP-vs-GhZFPH4_neg_peak_1475	4.56866	7.59735	3.61369	2.53E-08	0.000243394	Distal Intergenic	56098546	56117896	19351	1	Gohir.A04G065400.2	240030	IPR004193,IPR006047,IPR006048,IPR013780,IPR013783,IPR014756,IPR017853,IPR037439	Glycoside hydrolase, family 13, N-terminal|Glycosyl hydrolase, family 13, catalytic domain|Alpha-amylase/branching enzyme, C-terminal all beta|Glycosyl hydrolase, all-beta|Immunoglobulin-like fold|Immunoglobulin E-set|Glycoside hydrolase superfamily|1,4-alpha-glucan-branching enzyme	K00700	1,4-alpha-glucan branching enzyme [EC:2.4.1.18]	GO:0003824,GO:0003844,GO:0004553,GO:0005975,GO:0005978,GO:0043169	catalytic activity|1,4-alpha-glucan branching enzyme activity|hydrolase activity, hydrolyzing O-glycosyl compounds|carbohydrate metabolic process|glycogen biosynthetic process|cation binding	ko00500,ko01522	Starch and sucrose metabolism|Endocrine resistance
Gohir.D03G071102	D03	20160137	20160411	275	GhZFPH4_DAP-vs-GhZFPH4_neg_peak_5730	4.56866	7.59735	3.61369	2.53E-08	0.000243394	Distal Intergenic	20210844	20211813	970	1	Gohir.D03G071102.1	-50433	IPR000823,IPR002016,IPR010255	Plant peroxidase|Haem peroxidase|Haem peroxidase superfamily	-	-	GO:0004601,GO:0006979,GO:0020037,GO:0055114	peroxidase activity|response to oxidative stress|heme binding|oxidation-reduction process	-	-
Gohir.A05G321400	A05	71545986	71546115	130	GhZFPH4_DAP-vs-GhZFPH4_neg_peak_1841	4.55521	7.21102	3.26081	6.15E-08	0.000548517	Distal Intergenic	71188854	71191593	2740	2	Gohir.A05G321400.1	-354393	IPR018022,IPR027417,IPR039657	IPP transferase|P-loop containing nucleoside triphosphate hydrolase|Dimethylallyltransferase	K10760	adenylate dimethylallyltransferase (cytokinin synthase) [EC:2.5.1.27 2.5.1.112]	GO:0008033	tRNA processing	ko00908,ko01522	Zeatin biosynthesis|Endocrine resistance
Gohir.A11G225200	A11	76229993	76230232	240	GhZFPH4_DAP-vs-GhZFPH4_neg_peak_4214	4.55521	7.21102	3.26081	6.15E-08	0.000548517	Distal Intergenic	76285872	76290422	4551	1	Gohir.A11G225200.1	-55640	IPR007378	Tic22-like	-	-	GO:0015031	protein transport	-	-
Gohir.D01G100600	D01	18342079	18342444	366	GhZFPH4_DAP-vs-GhZFPH4_neg_peak_5187	4.55521	7.21102	3.26081	6.15E-08	0.000548517	Distal Intergenic	18355413	18357537	2125	1	Gohir.D01G100600.1	-12969	IPR002777,IPR009053	Prefoldin beta-like|Prefoldin	-	-	GO:0006457,GO:0016272,GO:0051082	protein folding|prefoldin complex|unfolded protein binding	-	-
Gohir.D06G109900	D06	27365669	27365827	159	GhZFPH4_DAP-vs-GhZFPH4_neg_peak_6377	4.55459	7.57271	3.59044	2.67E-08	0.000256779	Distal Intergenic	27399516	27402608	3093	2	Gohir.D06G109900.2	36781	IPR006840	Glutathione-specific gamma-glutamylcyclotransferase	K22596	gamma-glutamylcyclotransferase, plant [EC:4.3.2.9]	GO:0003839,GO:0006751	gamma-glutamylcyclotransferase activity|glutathione catabolic process	ko00480	Glutathione metabolism
Gohir.A13G086480	A13	49272848	49273071	224	GhZFPH4_DAP-vs-GhZFPH4_neg_peak_4932	4.54061	7.5482	3.56768	2.83E-08	0.000270595	Promoter (2-3kb)	49270294	49272334	2041	1	Gohir.A13G086480.2	2554	IPR001005,IPR009057,IPR015495,IPR017930	SANT/Myb domain|Homeobox-like domain superfamily|Myb-like transcription factor|Myb domain	K09422	transcription factor MYB, plant	GO:0003677	DNA binding	ko01522	Endocrine resistance
Gohir.D10G151900	D10	36629061	36629261	201	GhZFPH4_DAP-vs-GhZFPH4_neg_peak_7257	4.54061	7.5482	3.56768	2.83E-08	0.000270595	Distal Intergenic	36807798	36814218	6421	1	Gohir.D10G151900.3	-178537	-	-	-	-	-	-	-	-
Gohir.D08G204733	D08	61707671	61707835	165	GhZFPH4_DAP-vs-GhZFPH4_neg_peak_6969	4.54036	7.18596	3.23766	6.52E-08	0.000578549	Promoter (<=1kb)	61705535	61707266	1732	2	Gohir.D08G204733.1	-405	IPR002885,IPR011990	Pentatricopeptide repeat|Tetratricopeptide-like helical domain superfamily	-	-	GO:0005515	protein binding	-	-
Gohir.A01G140426	A01	69665210	69665323	114	GhZFPH4_DAP-vs-GhZFPH4_neg_peak_240	4.52561	7.16104	3.21472	6.90E-08	0.00060993	Distal Intergenic	69432405	69432837	433	2	Gohir.A01G140426.1	-232373	IPR013892	Cytochrome c oxidase biogenesis protein Cmc1-like	K18172	COX assembly mitochondrial protein 2	-	-	ko01522	Endocrine resistance
Gohir.A01G152000	A01	91672959	91673089	131	GhZFPH4_DAP-vs-GhZFPH4_neg_peak_338	4.52561	7.16104	3.21472	6.90E-08	0.00060993	Distal Intergenic	91108127	91111236	3110	1	Gohir.A01G152000.2	564832	IPR004776,IPR014024	Membrane transport protein|Auxin efflux carrier, plant type	-	-	GO:0016021,GO:0055085	integral component of membrane|transmembrane transport	ko01522	Endocrine resistance
Gohir.A04G023766	A04	4391641	4391847	207	GhZFPH4_DAP-vs-GhZFPH4_neg_peak_1231	4.52561	7.16104	3.21472	6.90E-08	0.00060993	Promoter (1-2kb)	4390020	4390834	815	1	Gohir.A04G023766.1	1621	-	-	-	-	-	-	-	-
Gohir.A06G125200	A06	90804365	90804525	161	GhZFPH4_DAP-vs-GhZFPH4_neg_peak_2271	4.52561	7.16104	3.21472	6.90E-08	0.00060993	Distal Intergenic	90788784	90790980	2197	1	Gohir.A06G125200.2	15581	IPR000407	Nucleoside phosphatase GDA1/CD39	-	-	GO:0016787	hydrolase activity	-	-
Gohir.A07G162800	A07	52317070	52317240	171	GhZFPH4_DAP-vs-GhZFPH4_neg_peak_2529	4.52561	7.16104	3.21472	6.90E-08	0.00060993	Distal Intergenic	52293721	52295927	2207	2	Gohir.A07G162800.3	-21143	IPR004263,IPR040911	Exostosin-like|Exostosin, GT47 domain	-	-	GO:0006486,GO:0016757	protein glycosylation|transferase activity, transferring glycosyl groups	-	-
Gohir.A08G085700	A08	61779359	61779609	251	GhZFPH4_DAP-vs-GhZFPH4_neg_peak_2948	4.52561	7.16104	3.21472	6.90E-08	0.00060993	Distal Intergenic	61825731	61828243	2513	1	Gohir.A08G085700.2	-46122	IPR000719,IPR001245,IPR011009	Protein kinase domain|Serine-threonine/tyrosine-protein kinase, catalytic domain|Protein kinase-like domain superfamily	-	-	GO:0004672,GO:0005524,GO:0006468	protein kinase activity|ATP binding|protein phosphorylation	-	-
Gohir.A08G101800	A08	67347346	67347477	132	GhZFPH4_DAP-vs-GhZFPH4_neg_peak_2962	4.52561	7.16104	3.21472	6.90E-08	0.00060993	Distal Intergenic	67728014	67730513	2500	1	Gohir.A08G101800.1	-380537	IPR000626,IPR003103,IPR029071,IPR036533,IPR039773	Ubiquitin-like domain|BAG domain|Ubiquitin-like domain superfamily|BAG domain superfamily|Molecular chaperone regulator BAG	-	-	GO:0005515,GO:0051087	protein binding|chaperone binding	-	-
Gohir.A09G030833	A09	11496496	11496691	196	GhZFPH4_DAP-vs-GhZFPH4_neg_peak_3185	4.52561	7.16104	3.21472	6.90E-08	0.00060993	Promoter (<=1kb)	11495230	11495769	540	2	Gohir.A09G030833.1	-727	IPR001584,IPR012337,IPR036397	Integrase, catalytic core|Ribonuclease H-like superfamily|Ribonuclease H superfamily	-	-	GO:0003676,GO:0015074	nucleic acid binding|DNA integration	-	-
Gohir.A10G118450	A10	57005071	57005239	169	GhZFPH4_DAP-vs-GhZFPH4_neg_peak_3775	4.52561	7.16104	3.21472	6.90E-08	0.00060993	Distal Intergenic	57424995	57428263	3269	1	Gohir.A10G118450.1	-419756	IPR005135,IPR036691	Endonuclease/exonuclease/phosphatase|Endonuclease/exonuclease/phosphatase superfamily	-	-	-	-	-	-
Gohir.A11G209600	A11	58657386	58657514	129	GhZFPH4_DAP-vs-GhZFPH4_neg_peak_4152	4.52561	7.16104	3.21472	6.90E-08	0.00060993	Distal Intergenic	58665262	58668591	3330	1	Gohir.A11G209600.1	-7748	IPR001272,IPR008210,IPR013035	Phosphoenolpyruvate carboxykinase, ATP-utilising|Phosphoenolpyruvate carboxykinase, N-terminal|Phosphoenolpyruvate carboxykinase, C-terminal	-	-	GO:0004611,GO:0004612,GO:0005524,GO:0006094,GO:0017076	phosphoenolpyruvate carboxykinase activity|phosphoenolpyruvate carboxykinase (ATP) activity|ATP binding|gluconeogenesis|purine nucleotide binding	-	-
Gohir.A11G229800	A11	92840187	92840333	147	GhZFPH4_DAP-vs-GhZFPH4_neg_peak_4274	4.52561	7.16104	3.21472	6.90E-08	0.00060993	Distal Intergenic	92956684	92962660	5977	2	Gohir.A11G229800.1	122327	IPR002293,IPR029485	Amino acid/polyamine transporter I|Cationic amino acid transporter, C-terminal	-	-	GO:0016020,GO:0022857,GO:0055085	membrane|transmembrane transporter activity|transmembrane transport	ko01522	Endocrine resistance
Gohir.D06G086200	D06	18655391	18655499	109	GhZFPH4_DAP-vs-GhZFPH4_neg_peak_6342	4.52561	7.16104	3.21472	6.90E-08	0.00060993	Distal Intergenic	18669135	18671897	2763	2	Gohir.D06G086200.1	16398	IPR013148,IPR013189,IPR013320,IPR023296	Glycosyl hydrolase family 32, N-terminal|Glycosyl hydrolase family 32, C-terminal|Concanavalin A-like lectin/glucanase domain superfamily|Glycosyl hydrolase, five-bladed beta-propellor domain superfamily	-	-	-	-	-	-
Gohir.D08G226200	D08	64749091	64749307	217	GhZFPH4_DAP-vs-GhZFPH4_neg_peak_6975	4.52561	7.16104	3.21472	6.90E-08	0.00060993	Promoter (<=1kb)	64748028	64749674	1647	2	Gohir.D08G226200.1	367	IPR004159,IPR029063	Putative S-adenosyl-L-methionine-dependent methyltransferase|S-adenosyl-L-methionine-dependent methyltransferase	-	-	GO:0008168	methyltransferase activity	-	-
Gohir.D09G024500	D09	7784603	7784729	127	GhZFPH4_DAP-vs-GhZFPH4_neg_peak_7009	4.52561	7.16104	3.21472	6.90E-08	0.00060993	Distal Intergenic	7798096	7799159	1064	2	Gohir.D09G024500.1	14430	IPR025886	Phloem protein 2-like	-	-	-	-	-	-
Gohir.D10G187500	D10	55067493	55067626	134	GhZFPH4_DAP-vs-GhZFPH4_neg_peak_7316	4.52561	7.16104	3.21472	6.90E-08	0.00060993	Distal Intergenic	55071965	55075019	3055	1	Gohir.D10G187500.1	-4339	-	-	K01934	5-formyltetrahydrofolate cyclo-ligase [EC:6.3.3.2]	-	-	ko00670	One carbon pool by folate
Gohir.D10G193200	D10	56321117	56321223	107	GhZFPH4_DAP-vs-GhZFPH4_neg_peak_7321	4.52561	7.16104	3.21472	6.90E-08	0.00060993	Distal Intergenic	56313984	56315707	1724	1	Gohir.D10G193200.1	7133	-	-	-	-	-	-	-	-
Gohir.D11G229240	D11	46078606	46078779	174	GhZFPH4_DAP-vs-GhZFPH4_neg_peak_7492	4.52561	7.16104	3.21472	6.90E-08	0.00060993	Distal Intergenic	46186760	46191581	4822	2	Gohir.D11G229240.1	112802	-	-	-	-	GO:0003677,GO:0046983	DNA binding|protein dimerization activity	-	-
Gohir.D13G009600	D13	873650	873755	106	GhZFPH4_DAP-vs-GhZFPH4_neg_peak_7773	4.52561	7.16104	3.21472	6.90E-08	0.00060993	3' UTR	872596	880522	7927	2	Gohir.D13G009600.2	6767	-	-	-	-	GO:0005515	protein binding	-	-
Gohir.A03G075600	A03	23748284	23748391	108	GhZFPH4_DAP-vs-GhZFPH4_neg_peak_903	4.51291	7.49955	3.52268	3.17E-08	0.000300137	Distal Intergenic	23712776	23715450	2675	2	Gohir.A03G075600.1	-32834	IPR000682,IPR029063	Protein-L-isoaspartate(D-aspartate) O-methyltransferase|S-adenosyl-L-methionine-dependent methyltransferase	K00573	protein-L-isoaspartate(D-aspartate) O-methyltransferase [EC:2.1.1.77]	GO:0004719,GO:0006464	protein-L-isoaspartate (D-aspartate) O-methyltransferase activity|cellular protein modification process	ko01522	Endocrine resistance
Gohir.A04G048200	A04	14134853	14135322	470	GhZFPH4_DAP-vs-GhZFPH4_neg_peak_1315	4.51291	7.49955	3.52268	3.17E-08	0.000300137	Distal Intergenic	14069701	14072409	2709	1	Gohir.A04G048200.1	65152	IPR001471,IPR016177,IPR017392,IPR036955	AP2/ERF domain|DNA-binding domain superfamily|AP2/ERF transcription factor ERF/PTI6|AP2/ERF domain superfamily	-	-	GO:0003677,GO:0003700,GO:0006355	DNA binding|DNA-binding transcription factor activity|regulation of transcription, DNA-templated	-	-
Gohir.A04G058526	A04	37809892	37810298	407	GhZFPH4_DAP-vs-GhZFPH4_neg_peak_1403	4.51291	7.49955	3.52268	3.17E-08	0.000300137	Promoter (<=1kb)	37809123	37810264	1142	1	Gohir.A04G058526.1	769	-	-	-	-	-	-	-	-
Gohir.A05G315200	A05	56127497	56127686	190	GhZFPH4_DAP-vs-GhZFPH4_neg_peak_1759	4.51291	7.49955	3.52268	3.17E-08	0.000300137	Distal Intergenic	55954666	55958042	3377	2	Gohir.A05G315200.2	-169455	IPR000326,IPR036938,IPR043216	Phosphatidic acid phosphatase type 2/haloperoxidase|Phosphatidic acid phosphatase type 2/haloperoxidase superfamily|Phospholipid phosphatase	K18693	diacylglycerol diphosphate phosphatase / phosphatidate phosphatase [EC:3.1.3.81 3.1.3.4]	GO:0006644,GO:0008195	phospholipid metabolic process|phosphatidate phosphatase activity	ko00561,ko00564	Glycerolipid metabolism|Glycerophospholipid metabolism
Gohir.A05G345836	A05	92300835	92301016	182	GhZFPH4_DAP-vs-GhZFPH4_neg_peak_1897	4.51291	7.49955	3.52268	3.17E-08	0.000300137	Distal Intergenic	91696325	91700084	3760	1	Gohir.A05G345836.1	604510	IPR000719,IPR006016,IPR011009,IPR014729	Protein kinase domain|UspA|Protein kinase-like domain superfamily|Rossmann-like alpha/beta/alpha sandwich fold	-	-	GO:0004672,GO:0005524,GO:0006468	protein kinase activity|ATP binding|protein phosphorylation	-	-
Gohir.A08G082700	A08	66799096	66799205	110	GhZFPH4_DAP-vs-GhZFPH4_neg_peak_2961	4.51291	7.49955	3.52268	3.17E-08	0.000300137	Promoter (2-3kb)	66801586	66805233	3648	1	Gohir.A08G082700.1	-2381	IPR006110,IPR006111,IPR012293,IPR028363,IPR036161	RNA polymerase, subunit omega/K/RPB6|Archaeal RpoK/eukaryotic RPB6 RNA polymerase subunit|RNA polymerase subunit, RPB6/omega|DNA-directed RNA polymerase, subunit RPB6|RPB6/omega subunit-like superfamily	K03014	DNA-directed RNA polymerases I, II, and III subunit RPABC2	GO:0003677,GO:0003899,GO:0005634,GO:0005665,GO:0006351	DNA binding|DNA-directed 5'-3' RNA polymerase activity|nucleus|RNA polymerase II, core complex|transcription, DNA-templated	ko01522,ko03020,ko04623	Endocrine resistance|RNA polymerase|Cytosolic DNA-sensing pathway
Gohir.A08G098500	A08	62905268	62905439	172	GhZFPH4_DAP-vs-GhZFPH4_neg_peak_2950	4.51291	7.49955	3.52268	3.17E-08	0.000300137	Promoter (2-3kb)	62907685	62910158	2474	1	Gohir.A08G098500.2	-2246	IPR003480,IPR023213	Transferase|Chloramphenicol acetyltransferase-like domain superfamily	K19747	BAHD acyltransferase [EC:2.3.1.-]	GO:0016747	transferase activity, transferring acyl groups other than amino-acyl groups	ko01522	Endocrine resistance
Gohir.A12G064300	A12	15310266	15310468	203	GhZFPH4_DAP-vs-GhZFPH4_neg_peak_4415	4.51291	7.49955	3.52268	3.17E-08	0.000300137	Distal Intergenic	15301824	15304837	3014	1	Gohir.A12G064300.2	8442	IPR000007,IPR001810,IPR025659,IPR036047	Tubby, C-terminal|F-box domain|Tubby-like, C-terminal|F-box-like domain superfamily	-	-	GO:0005515	protein binding	-	-
Gohir.D01G113800	D01	23823621	23823775	155	GhZFPH4_DAP-vs-GhZFPH4_neg_peak_5262	4.51291	7.49955	3.52268	3.17E-08	0.000300137	Distal Intergenic	23843800	23851967	8168	1	Gohir.D01G113800.1	-20025	IPR003480,IPR023213	Transferase|Chloramphenicol acetyltransferase-like domain superfamily	-	-	GO:0016747	transferase activity, transferring acyl groups other than amino-acyl groups	-	-
Gohir.D07G207000	D07	54389620	54389750	131	GhZFPH4_DAP-vs-GhZFPH4_neg_peak_6685	4.51291	7.49955	3.52268	3.17E-08	0.000300137	Promoter (1-2kb)	54387567	54388565	999	2	Gohir.D07G207000.1	-1055	IPR001841,IPR013083	Zinc finger, RING-type|Zinc finger, RING/FYVE/PHD-type	-	-	-	-	-	-
Gohir.D08G104700	D08	28883179	28883434	256	GhZFPH4_DAP-vs-GhZFPH4_neg_peak_6808	4.51291	7.49955	3.52268	3.17E-08	0.000300137	Distal Intergenic	28928835	28930722	1888	2	Gohir.D08G104700.1	47288	IPR000490,IPR017853	Glycoside hydrolase family 17|Glycoside hydrolase superfamily	-	-	GO:0004553,GO:0005975	hydrolase activity, hydrolyzing O-glycosyl compounds|carbohydrate metabolic process	-	-
Gohir.D11G171000	D11	18845642	18845817	176	GhZFPH4_DAP-vs-GhZFPH4_neg_peak_7395	4.51291	7.49955	3.52268	3.17E-08	0.000300137	Exon (Gohir.D11G171000.1/Gohir.D11G171000, exon 3 of 3)	18845011	18850925	5915	2	Gohir.D11G171000.1	5108	-	-	-	-	GO:0004672,GO:0005524,GO:0006468,GO:0030247	protein kinase activity|ATP binding|protein phosphorylation|polysaccharide binding	-	-
Gohir.D13G065900	D13	9877854	9878050	197	GhZFPH4_DAP-vs-GhZFPH4_neg_peak_7797	4.51291	7.49955	3.52268	3.17E-08	0.000300137	Distal Intergenic	9882548	9885531	2984	2	Gohir.D13G065900.1	7481	-	-	-	-	GO:0003824	catalytic activity	-	-
Gohir.A01G134400	A01	48499168	48499314	147	GhZFPH4_DAP-vs-GhZFPH4_neg_peak_151	4.51096	7.13626	3.19198	7.31E-08	0.000642717	Distal Intergenic	48594519	48595455	937	2	Gohir.A01G134400.1	96141	-	-	-	-	-	-	-	-
Gohir.A01G140426	A01	69189569	69189791	223	GhZFPH4_DAP-vs-GhZFPH4_neg_peak_238	4.51096	7.13626	3.19198	7.31E-08	0.000642717	Distal Intergenic	69429517	69432811	3295	2	Gohir.A01G140426.2	243020	IPR013892	Cytochrome c oxidase biogenesis protein Cmc1-like	K18172	COX assembly mitochondrial protein 2	-	-	ko01522	Endocrine resistance
Gohir.A03G208400	A03	112909972	112910136	165	GhZFPH4_DAP-vs-GhZFPH4_neg_peak_1211	4.51096	7.13626	3.19198	7.31E-08	0.000642717	Promoter (<=1kb)	112908307	112910644	2338	2	Gohir.A03G208400.1	508	IPR007658,IPR025315	Protein of unknown function DUF594|Domain of unknown function DUF4220	-	-	-	-	-	-
Gohir.A06G063000	A06	14880261	14880453	193	GhZFPH4_DAP-vs-GhZFPH4_neg_peak_1990	4.51096	7.13626	3.19198	7.31E-08	0.000642717	Distal Intergenic	14907641	14909342	1702	2	Gohir.A06G063000.1	28889	IPR003663,IPR005828,IPR020846,IPR036259	Sugar/inositol transporter|Major facilitator, sugar transporter-like|Major facilitator superfamily domain|MFS transporter superfamily	-	-	GO:0016020,GO:0016021,GO:0022857,GO:0055085	membrane|integral component of membrane|transmembrane transporter activity|transmembrane transport	-	-
Gohir.A08G094700	A08	57361447	57361656	210	GhZFPH4_DAP-vs-GhZFPH4_neg_peak_2932	4.51096	7.13626	3.19198	7.31E-08	0.000642717	Distal Intergenic	57382210	57386123	3914	2	Gohir.A08G094700.2	24467	IPR004263,IPR040911	Exostosin-like|Exostosin, GT47 domain	-	-	GO:0006486,GO:0016757	protein glycosylation|transferase activity, transferring glycosyl groups	-	-
Gohir.A11G224808	A11	78502652	78502963	312	GhZFPH4_DAP-vs-GhZFPH4_neg_peak_4226	4.51096	7.13626	3.19198	7.31E-08	0.000642717	Distal Intergenic	78454249	78473273	19025	2	Gohir.A11G224808.2	-29379	IPR000408,IPR009091	Regulator of chromosome condensation, RCC1|Regulator of chromosome condensation 1/beta-lactamase-inhibitor protein II	-	-	-	-	-	-
Gohir.D02G117000	D02	39405932	39406068	137	GhZFPH4_DAP-vs-GhZFPH4_neg_peak_5538	4.51096	7.13626	3.19198	7.31E-08	0.000642717	Distal Intergenic	39391376	39399136	7761	2	Gohir.D02G117000.5	-6796	-	-	-	-	-	-	-	-
Gohir.D03G089933	D03	37005374	37005515	142	GhZFPH4_DAP-vs-GhZFPH4_neg_peak_5810	4.51096	7.13626	3.19198	7.31E-08	0.000642717	Distal Intergenic	37035569	37035909	341	1	Gohir.D03G089933.1	-30054	-	-	-	-	-	-	-	-
Gohir.A05G219500	A05	22180725	22181000	276	GhZFPH4_DAP-vs-GhZFPH4_neg_peak_1650	4.50167	7.84002	3.83889	1.45E-08	0.000144914	Promoter (2-3kb)	22174708	22183339	8632	2	Gohir.A05G219500.5	2339	IPR001752,IPR027417,IPR027640,IPR036961	Kinesin motor domain|P-loop containing nucleoside triphosphate hydrolase|Kinesin-like protein|Kinesin motor domain superfamily	-	-	GO:0003777,GO:0005524,GO:0007018,GO:0008017	microtubule motor activity|ATP binding|microtubule-based movement|microtubule binding	ko01522	Endocrine resistance
Gohir.A05G308250	A05	47534796	47534993	198	GhZFPH4_DAP-vs-GhZFPH4_neg_peak_1729	4.50167	7.84002	3.83889	1.45E-08	0.000144914	Distal Intergenic	47506973	47509171	2199	1	Gohir.A05G308250.1	27823	IPR013087,IPR036236,IPR039288	Zinc finger C2H2-type|Zinc finger C2H2 superfamily|Zinc finger protein SHOOT GRAVITROPISM 5-like	-	-	GO:0009630	gravitropism	-	-
Gohir.A06G083500	A06	27309684	27310007	324	GhZFPH4_DAP-vs-GhZFPH4_neg_peak_2035	4.50167	7.84002	3.83889	1.45E-08	0.000144914	Distal Intergenic	27206434	27213820	7387	1	Gohir.A06G083500.2	103250	IPR000719,IPR001611,IPR011009,IPR013210,IPR032675	Protein kinase domain|Leucine-rich repeat|Protein kinase-like domain superfamily|Leucine-rich repeat-containing N-terminal, plant-type|Leucine-rich repeat domain superfamily	K20718	LRR receptor-like serine/threonine-protein kinase ERECTA [EC:2.7.11.1]	GO:0004672,GO:0005515,GO:0005524,GO:0006468	protein kinase activity|protein binding|ATP binding|protein phosphorylation	ko01522,ko04016	Endocrine resistance|MAPK signaling pathway - plant
Gohir.D01G171400	D01	58098178	58098312	135	GhZFPH4_DAP-vs-GhZFPH4_neg_peak_5382	4.50167	7.84002	3.83889	1.45E-08	0.000144914	Distal Intergenic	58111505	58114463	2959	2	Gohir.D01G171400.4	16151	-	-	-	-	-	-	-	-
Gohir.D02G083100	D02	14373983	14374160	178	GhZFPH4_DAP-vs-GhZFPH4_neg_peak_5444	4.50167	7.84002	3.83889	1.45E-08	0.000144914	Distal Intergenic	14427625	14429701	2077	1	Gohir.D02G083100.1	-53465	-	-	K09286	EREBP-like factor	-	-	ko01522	Endocrine resistance
Gohir.D06G123400	D06	40074023	40074386	364	GhZFPH4_DAP-vs-GhZFPH4_neg_peak_6411	4.50167	7.84002	3.83889	1.45E-08	0.000144914	Distal Intergenic	40044824	40048698	3875	2	Gohir.D06G123400.1	-25325	IPR002124,IPR036972	Cytochrome c oxidase, subunit Vb|Cytochrome c oxidase, subunit Vb superfamily	-	-	GO:0004129,GO:0005740	cytochrome-c oxidase activity|mitochondrial envelope	ko00190,ko04714	Oxidative phosphorylation|Thermogenesis
Gohir.D08G071900	D08	9270135	9270416	282	GhZFPH4_DAP-vs-GhZFPH4_neg_peak_6724	4.50167	7.84002	3.83889	1.45E-08	0.000144914	Distal Intergenic	9251348	9253905	2558	2	Gohir.D08G071900.2	-16230	IPR015898	G-protein gamma-like domain	-	-	GO:0007186	G protein-coupled receptor signaling pathway	-	-
Gohir.A04G065600	A04	56919420	56919604	185	GhZFPH4_DAP-vs-GhZFPH4_neg_peak_1479	4.49919	7.47541	3.50015	3.35E-08	0.000316119	Distal Intergenic	57110467	57112979	2513	1	Gohir.A04G065600.1	-190863	IPR000741,IPR013785	Fructose-bisphosphate aldolase, class-I|Aldolase-type TIM barrel	K01623	fructose-bisphosphate aldolase, class I [EC:4.1.2.13]	GO:0003824,GO:0004332,GO:0006096	catalytic activity|fructose-bisphosphate aldolase activity|glycolytic process	ko00010,ko00030,ko00051,ko00680,ko00710,ko01522,ko04066	Glycolysis / Gluconeogenesis|Pentose phosphate pathway|Fructose and mannose metabolism|Methane metabolism|Carbon fixation in photosynthetic organisms|Endocrine resistance|HIF-1 signaling pathway
Gohir.A04G058300	A04	27081465	27081702	238	GhZFPH4_DAP-vs-GhZFPH4_neg_peak_1355	4.4964	7.11162	3.16915	7.73E-08	0.000677407	Distal Intergenic	27340062	27342961	2900	1	Gohir.A04G058300.1	-258360	IPR003690,IPR038538	Transcription termination factor, mitochondrial/chloroplastic|MTERF superfamily, mitochondrial/chloroplastic	-	-	GO:0003690,GO:0006355	double-stranded DNA binding|regulation of transcription, DNA-templated	-	-
Gohir.A06G082300	A06	25893301	25893428	128	GhZFPH4_DAP-vs-GhZFPH4_neg_peak_2030	4.4964	7.11162	3.16915	7.73E-08	0.000677407	Distal Intergenic	25827125	25828543	1419	2	Gohir.A06G082300.1	-64758	IPR001005,IPR009057,IPR015495,IPR017930	SANT/Myb domain|Homeobox-like domain superfamily|Myb-like transcription factor|Myb domain	K09422	transcription factor MYB, plant	GO:0003677	DNA binding	ko01522	Endocrine resistance
Gohir.A07G155700	A07	51025050	51025236	187	GhZFPH4_DAP-vs-GhZFPH4_neg_peak_2518	4.4964	7.11162	3.16915	7.73E-08	0.000677407	Distal Intergenic	51119568	51119958	391	1	Gohir.A07G155700.1	-94332	IPR008801	Rapid ALkalinization Factor	-	-	-	-	-	-
Gohir.A11G205450	A11	49781848	49782037	190	GhZFPH4_DAP-vs-GhZFPH4_neg_peak_4130	4.4964	7.11162	3.16915	7.73E-08	0.000677407	Distal Intergenic	49796518	49802838	6321	2	Gohir.A11G205450.2	20801	IPR022709	Protein SCAI	-	-	GO:0003714,GO:0006351	transcription corepressor activity|transcription, DNA-templated	-	-
Gohir.D03G099200	D03	39932456	39932598	143	GhZFPH4_DAP-vs-GhZFPH4_neg_peak_5819	4.4964	7.11162	3.16915	7.73E-08	0.000677407	Distal Intergenic	39873493	39875285	1793	1	Gohir.D03G099200.1	58963	IPR001841,IPR013083	Zinc finger, RING-type|Zinc finger, RING/FYVE/PHD-type	-	-	-	-	-	-
Gohir.A08G117100	A08	93358978	93359140	163	GhZFPH4_DAP-vs-GhZFPH4_neg_peak_3034	4.48554	7.45139	3.47772	3.54E-08	0.000332874	Distal Intergenic	93331258	93336164	4907	1	Gohir.A08G117100.1	27720	IPR000352,IPR004373,IPR005139	Peptide chain release factor class I|Peptide chain release factor 1|Peptide chain release factor	-	-	GO:0003747,GO:0006415,GO:0016149	translation release factor activity|translational termination|translation release factor activity, codon specific	ko01522	Endocrine resistance
Gohir.A12G268700	A12	108600257	108600414	158	GhZFPH4_DAP-vs-GhZFPH4_neg_peak_4764	4.48193	7.08711	3.14681	8.18E-08	0.000713165	Exon (Gohir.A12G268600.1/Gohir.A12G268600, exon 11 of 13)	108601925	108607861	5937	2	Gohir.A12G268700.1	7447	IPR019177	Golgin subfamily A member 5	-	-	GO:0007030	Golgi organization	-	-
Gohir.D08G117900	D08	38961845	38961986	142	GhZFPH4_DAP-vs-GhZFPH4_neg_peak_6870	4.48193	7.08711	3.14681	8.18E-08	0.000713165	Distal Intergenic	38954919	38955942	1024	2	Gohir.D08G117900.1	-5903	IPR039282	Protein response to low sulfur	-	-	GO:0098869	cellular oxidant detoxification	-	-
Gohir.D05G316800	D05	44427849	44428067	219	GhZFPH4_DAP-vs-GhZFPH4_neg_peak_6193	4.47457	8.08709	4.06893	8.18E-09	8.53E-05	Distal Intergenic	44716651	44720753	4103	1	Gohir.D05G316800.1	-288584	-	-	-	-	-	-	-	-
Gohir.D04G000065	D04	138718	138948	231	GhZFPH4_DAP-vs-GhZFPH4_neg_peak_5869	4.47198	7.42749	3.45536	3.74E-08	0.000350461	Distal Intergenic	150173	151194	1022	2	Gohir.D04G000065.1	12246	-	-	-	-	-	-	-	-
Gohir.D09G139850	D09	44409109	44409230	122	GhZFPH4_DAP-vs-GhZFPH4_neg_peak_7121	4.47198	7.42749	3.45536	3.74E-08	0.000350461	Distal Intergenic	44403666	44405680	2015	1	Gohir.D09G139850.1	5443	-	-	-	-	-	-	-	-
Gohir.D11G227600	D11	40667739	40667904	166	GhZFPH4_DAP-vs-GhZFPH4_neg_peak_7472	4.47198	7.42749	3.45536	3.74E-08	0.000350461	Distal Intergenic	40690514	40690756	243	2	Gohir.D11G227600.1	22852	-	-	-	-	-	-	-	-
Gohir.A02G118900	A02	85220892	85221109	218	GhZFPH4_DAP-vs-GhZFPH4_neg_peak_726	4.46755	7.06273	3.12379	8.66E-08	0.000751986	Distal Intergenic	85263609	85264322	714	2	Gohir.A02G118900.1	43213	-	-	-	-	-	-	-	-
Gohir.A07G148100	A07	37583319	37583435	117	GhZFPH4_DAP-vs-GhZFPH4_neg_peak_2476	4.46755	7.06273	3.12379	8.66E-08	0.000751986	Distal Intergenic	37559037	37560102	1066	1	Gohir.A07G148100.1	24282	IPR001471,IPR016177,IPR017392,IPR036955	AP2/ERF domain|DNA-binding domain superfamily|AP2/ERF transcription factor ERF/PTI6|AP2/ERF domain superfamily	-	-	GO:0003677,GO:0003700,GO:0006355	DNA binding|DNA-binding transcription factor activity|regulation of transcription, DNA-templated	-	-
Gohir.A10G124901	A10	69668598	69668935	338	GhZFPH4_DAP-vs-GhZFPH4_neg_peak_3819	4.46755	7.06273	3.12379	8.66E-08	0.000751986	Distal Intergenic	70034341	70040136	5796	1	Gohir.A10G124901.3	-365406	IPR001606,IPR009071,IPR036431,IPR036910	ARID DNA-binding domain|High mobility group box domain|ARID DNA-binding domain superfamily|High mobility group box domain superfamily	-	-	GO:0003677	DNA binding	-	-
Gohir.A02G121701	A02	87811669	87811962	294	GhZFPH4_DAP-vs-GhZFPH4_neg_peak_737	4.45851	7.40371	3.43306	3.95E-08	0.000368927	Distal Intergenic	87763405	87771023	7619	1	Gohir.A02G121701.3	48264	-	-	-	-	-	-	-	-
Gohir.A04G094000	A04	78179997	78180235	239	GhZFPH4_DAP-vs-GhZFPH4_neg_peak_1543	4.45851	7.40371	3.43306	3.95E-08	0.000368927	Distal Intergenic	78174388	78178172	3785	1	Gohir.A04G094000.2	5609	IPR001611,IPR013210,IPR032675	Leucine-rich repeat|Leucine-rich repeat-containing N-terminal, plant-type|Leucine-rich repeat domain superfamily	-	-	GO:0005515	protein binding	-	-
Gohir.A11G232000	A11	93986574	93986885	312	GhZFPH4_DAP-vs-GhZFPH4_neg_peak_4279	4.45851	7.40371	3.43306	3.95E-08	0.000368927	Distal Intergenic	93820026	93820903	878	2	Gohir.A11G232000.1	-165671	IPR001104,IPR039357	3-oxo-5-alpha-steroid 4-dehydrogenase, C-terminal|3-oxo-5-alpha-steroid 4-dehydrogenase/very-long-chain enoyl-CoA reductase	K10258	very-long-chain enoyl-CoA reductase [EC:1.3.1.93]	GO:0006629,GO:0016627	lipid metabolic process|oxidoreductase activity, acting on the CH-CH group of donors	ko00062,ko01040,ko01522	Fatty acid elongation|Biosynthesis of unsaturated fatty acids|Endocrine resistance
Gohir.A02G126001	A02	92145797	92145963	167	GhZFPH4_DAP-vs-GhZFPH4_neg_peak_762	4.45327	7.03848	3.10189	9.15E-08	0.000790879	Distal Intergenic	92254279	92254827	549	1	Gohir.A02G126001.1	-108316	-	-	-	-	-	-	-	-
Gohir.A04G061400	A04	52242400	52242604	205	GhZFPH4_DAP-vs-GhZFPH4_neg_peak_1462	4.45327	7.03848	3.10189	9.15E-08	0.000790879	Distal Intergenic	52260189	52262090	1902	2	Gohir.A04G061400.1	19486	IPR006458,IPR038933	Ovate protein family, C-terminal|Ovate protein family	-	-	GO:0045892	negative regulation of transcription, DNA-templated	-	-
Gohir.D04G085800	D04	20223052	20223277	226	GhZFPH4_DAP-vs-GhZFPH4_neg_peak_5918	4.45327	7.03848	3.10189	9.15E-08	0.000790879	Distal Intergenic	19895801	19899029	3229	2	Gohir.D04G085800.3	-324023	IPR036282	Glutathione S-transferase, C-terminal domain superfamily	-	-	-	-	-	-
Gohir.D11G243032	D11	51701479	51701625	147	GhZFPH4_DAP-vs-GhZFPH4_neg_peak_7514	4.45327	7.03848	3.10189	9.15E-08	0.000790879	Promoter (2-3kb)	51698762	51699274	513	2	Gohir.D11G243032.1	-2205	-	-	-	-	GO:0046983	protein dimerization activity	-	-
Gohir.A07G161910	A07	47454628	47454750	123	GhZFPH4_DAP-vs-GhZFPH4_neg_peak_2508	4.44511	7.38005	3.4113	4.17E-08	0.000387882	Distal Intergenic	47386603	47387619	1017	1	Gohir.A07G161910.1	68025	IPR006941,IPR012337,IPR036397,IPR039637	Ribonuclease CAF1|Ribonuclease H-like superfamily|Ribonuclease H superfamily|CCR4-NOT transcription complex subunit 7/8/Pop2	-	-	GO:0003676,GO:0004535,GO:0030014	nucleic acid binding|poly(A)-specific ribonuclease activity|CCR4-NOT complex	-	-
Gohir.A09G040765	A09	24967845	24968085	241	GhZFPH4_DAP-vs-GhZFPH4_neg_peak_3263	4.44511	7.38005	3.4113	4.17E-08	0.000387882	Distal Intergenic	25039948	25041445	1498	1	Gohir.A09G040765.1	-71863	-	-	-	-	-	-	-	-
Gohir.A12G011800	A12	1517568	1517700	133	GhZFPH4_DAP-vs-GhZFPH4_neg_peak_4359	4.44511	7.38005	3.4113	4.17E-08	0.000387882	Distal Intergenic	1525929	1530199	4271	1	Gohir.A12G011800.1	-8229	IPR000644,IPR001807,IPR014743	CBS domain|Chloride channel, voltage gated|Chloride channel, core	-	-	GO:0005247,GO:0006821,GO:0016020,GO:0055085	voltage-gated chloride channel activity|chloride transport|membrane|transmembrane transport	-	-
Gohir.A05G326801	A05	62051102	62051265	164	GhZFPH4_DAP-vs-GhZFPH4_neg_peak_1787	4.4432	7.66459	3.67597	2.16E-08	0.000210877	Promoter (<=1kb)	62051337	62051848	512	1	Gohir.A05G326801.1	-72	-	-	-	-	-	-	-	-
Gohir.A10G121400	A10	63852232	63852441	210	GhZFPH4_DAP-vs-GhZFPH4_neg_peak_3798	4.4432	7.66459	3.67597	2.16E-08	0.000210877	Distal Intergenic	63807710	63811672	3963	1	Gohir.A10G121400.1	44522	IPR002155,IPR016039,IPR020616,IPR020617	Thiolase|Thiolase-like|Thiolase, N-terminal|Thiolase, C-terminal	K07513	acetyl-CoA acyltransferase 1 [EC:2.3.1.16]	GO:0003824,GO:0016747	catalytic activity|transferase activity, transferring acyl groups other than amino-acyl groups	ko00071,ko00280,ko00592,ko01040,ko03320,ko04146	Fatty acid degradation|Valine, leucine and isoleucine degradation|alpha-Linolenic acid metabolism|Biosynthesis of unsaturated fatty acids|PPAR signaling pathway|Peroxisome
Gohir.A11G205900	A11	54542554	54542710	157	GhZFPH4_DAP-vs-GhZFPH4_neg_peak_4136	4.4432	7.66459	3.67597	2.16E-08	0.000210877	Distal Intergenic	54786093	54789116	3024	2	Gohir.A11G205900.1	246406	IPR004367,IPR006671,IPR036915,IPR039361	Cyclin, C-terminal domain|Cyclin, N-terminal|Cyclin-like superfamily|Cyclin	-	-	GO:0042025	host cell nucleus	ko01522	Endocrine resistance
Gohir.A12G081700	A12	49841878	49842100	223	GhZFPH4_DAP-vs-GhZFPH4_neg_peak_4528	4.4432	7.66459	3.67597	2.16E-08	0.000210877	Distal Intergenic	50039376	50043318	3943	1	Gohir.A12G081700.2	-197276	IPR000719,IPR001245,IPR011009,IPR025875,IPR032675	Protein kinase domain|Serine-threonine/tyrosine-protein kinase, catalytic domain|Protein kinase-like domain superfamily|Leucine rich repeat 4|Leucine-rich repeat domain superfamily	-	-	GO:0004672,GO:0005524,GO:0006468	protein kinase activity|ATP binding|protein phosphorylation	-	-
Gohir.A13G117700	A13	83688751	83688893	143	GhZFPH4_DAP-vs-GhZFPH4_neg_peak_5056	4.4432	7.66459	3.67597	2.16E-08	0.000210877	Distal Intergenic	83539686	83544880	5195	2	Gohir.A13G117700.1	-143871	IPR006703,IPR027417	AIG1-type guanine nucleotide-binding (G) domain|P-loop containing nucleoside triphosphate hydrolase	-	-	GO:0005525	GTP binding	-	-
Gohir.A06G110800	A06	82254430	82254607	178	GhZFPH4_DAP-vs-GhZFPH4_neg_peak_2232	4.43908	7.01437	3.0797	9.67E-08	0.000832339	Distal Intergenic	82359107	82370612	11506	2	Gohir.A06G110800.1	116005	IPR013830,IPR036514	SGNH hydrolase-type esterase domain|SGNH hydrolase superfamily	K23978	isoamyl acetate esterase [EC:3.1.1.112]	-	-	ko01522	Endocrine resistance
Gohir.A07G149200	A07	38875374	38875530	157	GhZFPH4_DAP-vs-GhZFPH4_neg_peak_2479	4.43908	7.01437	3.0797	9.67E-08	0.000832339	Distal Intergenic	38932974	38938612	5639	1	Gohir.A07G149200.1	-57444	IPR000225,IPR003613,IPR011989,IPR013083,IPR016024	Armadillo|U box domain|Armadillo-like helical|Zinc finger, RING/FYVE/PHD-type|Armadillo-type fold	-	-	GO:0004842,GO:0005515,GO:0016567	ubiquitin-protein transferase activity|protein binding|protein ubiquitination	-	-
Gohir.A08G109900	A08	82407651	82407786	136	GhZFPH4_DAP-vs-GhZFPH4_neg_peak_3001	4.43908	7.01437	3.0797	9.67E-08	0.000832339	Distal Intergenic	82690445	82691833	1389	1	Gohir.A08G109900.1	-282659	IPR011598,IPR025610,IPR036638	Myc-type, basic helix-loop-helix (bHLH) domain|Transcription factor MYC/MYB N-terminal|Helix-loop-helix DNA-binding domain superfamily	K13422	transcription factor MYC2	GO:0046983	protein dimerization activity	ko01522,ko04016,ko04075	Endocrine resistance|MAPK signaling pathway - plant|Plant hormone signal transduction
Gohir.A08G120900	A08	95402279	95402772	494	GhZFPH4_DAP-vs-GhZFPH4_neg_peak_3038	4.43908	7.01437	3.0797	9.67E-08	0.000832339	Promoter (2-3kb)	95397450	95399952	2503	2	Gohir.A08G120900.1	-2327	IPR005225,IPR006689,IPR027417	Small GTP-binding protein domain|Small GTPase superfamily, ARF/SAR type|P-loop containing nucleoside triphosphate hydrolase	K07937	ADP-ribosylation factor 1/2	GO:0005525	GTP binding	ko01522,ko04072,ko04144,ko05110,ko05130,ko05131,ko05132,ko05134	Endocrine resistance|Phospholipase D signaling pathway|Endocytosis|Vibrio cholerae infection|Pathogenic Escherichia coli infection|Shigellosis|Salmonella infection|Legionellosis
Gohir.A10G102431	A10	22968797	22968995	199	GhZFPH4_DAP-vs-GhZFPH4_neg_peak_3659	4.43908	7.01437	3.0797	9.67E-08	0.000832339	Distal Intergenic	22956979	22959453	2475	1	Gohir.A10G102431.1	11818	IPR002048,IPR011992	EF-hand domain|EF-hand domain pair	-	-	GO:0005509	calcium ion binding	-	-
Gohir.D12G036900	D12	5173594	5173789	196	GhZFPH4_DAP-vs-GhZFPH4_neg_peak_7597	4.43908	7.01437	3.0797	9.67E-08	0.000832339	Distal Intergenic	5190114	5191611	1498	2	Gohir.D12G036900.1	17822	-	-	-	-	-	-	-	-
Gohir.D13G196500	D13	60303350	60303680	331	GhZFPH4_DAP-vs-GhZFPH4_neg_peak_7966	4.43908	7.01437	3.0797	9.67E-08	0.000832339	Exon (Gohir.D13G196500.1/Gohir.D13G196500, exon 7 of 10)	60300349	60305690	5342	1	Gohir.D13G196500.1	3001	-	-	-	-	-	-	-	-
Gohir.A10G111100	A10	32690217	32690561	345	GhZFPH4_DAP-vs-GhZFPH4_neg_peak_3696	4.43787	7.72311	3.73	1.89E-08	0.000186209	Distal Intergenic	32828077	32832523	4447	2	Gohir.A10G111100.1	141962	IPR021715,IPR039974	Pre-mRNA-splicing factor SLU7 domain|Pre-mRNA-splicing factor SLU7	-	-	GO:0000386,GO:0000398,GO:0030628	second spliceosomal transesterification activity|mRNA splicing, via spliceosome|pre-mRNA 3'-splice site binding	-	-
Gohir.A02G096300	A02	43152570	43152782	213	GhZFPH4_DAP-vs-GhZFPH4_neg_peak_588	4.43734	9.46042	5.35403	3.46E-10	4.43E-06	Distal Intergenic	43210097	43213797	3701	2	Gohir.A02G096300.1	61015	-	-	-	-	-	-	-	-
Gohir.A05G324701	A05	61104318	61104480	163	GhZFPH4_DAP-vs-GhZFPH4_neg_peak_1778	4.43734	9.46042	5.35403	3.46E-10	4.43E-06	Distal Intergenic	60851666	60855463	3798	2	Gohir.A05G324701.1	-248855	IPR004088,IPR009019,IPR036612	K Homology domain, type 1|K homology domain superfamily, prokaryotic type|K Homology domain, type 1 superfamily	-	-	GO:0003723	RNA binding	-	-
Gohir.A13G134000	A13	93105879	93106078	200	GhZFPH4_DAP-vs-GhZFPH4_neg_peak_5085	4.43734	9.46042	5.35403	3.46E-10	4.43E-06	Distal Intergenic	93077315	93078011	697	1	Gohir.A13G134000.1	28564	IPR000164,IPR007125,IPR009072	Histone H3/CENP-A|Histone H2A/H2B/H3|Histone-fold	K11253	histone H3	GO:0000786,GO:0003677,GO:0046982	nucleosome|DNA binding|protein heterodimerization activity	ko01522,ko05034,ko05131,ko05322	Endocrine resistance|Alcoholism|Shigellosis|Systemic lupus erythematosus
Gohir.A01G149218	A01	83512246	83512415	170	GhZFPH4_DAP-vs-GhZFPH4_neg_peak_309	4.4318	7.35651	3.38943	4.40E-08	0.000407915	Distal Intergenic	83439270	83439554	285	1	Gohir.A01G149218.1	72976	IPR003676	Small auxin-up RNA	-	-	GO:0009733	response to auxin	-	-
Gohir.D09G041000	D09	16045563	16045707	145	GhZFPH4_DAP-vs-GhZFPH4_neg_peak_7033	4.42855	13.3826	9.08671	4.14E-14	8.19E-10	Distal Intergenic	15917636	15930494	12859	1	Gohir.D09G041000.2	127927	IPR029005	LIM-domain binding protein/SEUSS	-	-	-	-	-	-
Gohir.A06G114800	A06	69914582	69914769	188	GhZFPH4_DAP-vs-GhZFPH4_neg_peak_2182	4.42498	6.99039	3.05804	1.02E-07	0.000874903	Distal Intergenic	69973701	69981258	7558	1	Gohir.A06G114800.1	-58932	IPR008409	Pre-mRNA-splicing factor SPF27	K12861	pre-mRNA-splicing factor SPF27	GO:0006397	mRNA processing	ko01522,ko03040	Endocrine resistance|Spliceosome
Gohir.D06G197400	D06	64660943	64661213	271	GhZFPH4_DAP-vs-GhZFPH4_neg_peak_6483	4.42498	6.99039	3.05804	1.02E-07	0.000874903	Promoter (1-2kb)	64656827	64662530	5704	2	Gohir.D06G197400.1	1317	IPR005120,IPR012677,IPR035979,IPR039722	UPF3 domain|Nucleotide-binding alpha-beta plait domain superfamily|RNA-binding domain superfamily|Nonsense-mediated mRNA decay protein 3	K14328	regulator of nonsense transcripts 3	GO:0000184,GO:0003676	nuclear-transcribed mRNA catabolic process, nonsense-mediated decay|nucleic acid binding	ko01522,ko03013,ko03015	Endocrine resistance|RNA transport|mRNA surveillance pathway
Gohir.A03G079800	A03	27205941	27206078	138	GhZFPH4_DAP-vs-GhZFPH4_neg_peak_920	4.42041	27.0258	22.2737	9.42E-28	5.32E-23	Distal Intergenic	27223215	27226260	3046	1	Gohir.A03G079800.1	-17137	IPR000719,IPR011009	Protein kinase domain|Protein kinase-like domain superfamily	K20535	mitogen-activated protein kinase 1/2 [EC:2.7.11.24]	GO:0004672,GO:0005524,GO:0006468	protein kinase activity|ATP binding|protein phosphorylation	ko01522,ko04016	Endocrine resistance|MAPK signaling pathway - plant
Gohir.D10G246600	D10	64905866	64906131	266	GhZFPH4_DAP-vs-GhZFPH4_neg_peak_7341	4.42037	7.98284	3.97233	1.04E-08	0.000106579	Distal Intergenic	64922463	64926088	3626	1	Gohir.D10G246600.1	-16332	-	-	-	-	-	-	-	-
Gohir.A07G177200	A07	71906477	71906707	231	GhZFPH4_DAP-vs-GhZFPH4_neg_peak_2620	4.41856	7.33309	3.36751	4.64E-08	0.000429032	Distal Intergenic	72284817	72288846	4030	1	Gohir.A07G177200.1	-378110	IPR000195,IPR035969	Rab-GTPase-TBC domain|Rab-GTPase-TBC domain superfamily	K20165	TBC1 domain family member 2A	-	-	ko01522	Endocrine resistance
Gohir.A01G113400	A01	23960567	23960710	144	GhZFPH4_DAP-vs-GhZFPH4_neg_peak_71	4.41286	7.6771	3.68745	2.10E-08	0.000205376	Distal Intergenic	23969640	23975971	6332	1	Gohir.A01G113400.1	-8930	IPR002490,IPR026028	V-type ATPase, V0 complex, 116kDa subunit family|ATPase, V0 complex, subunit 116kDa, eukaryotic	K02154	V-type H+-transporting ATPase subunit a	GO:0000220,GO:0015078,GO:0033179,GO:1902600	vacuolar proton-transporting V-type ATPase, V0 domain|proton transmembrane transporter activity|proton-transporting V-type ATPase, V0 domain|proton transmembrane transport	ko00190,ko01522,ko04142,ko04145,ko04721,ko04966,ko05110,ko05120,ko05152,ko05323	Oxidative phosphorylation|Endocrine resistance|Lysosome|Phagosome|Synaptic vesicle cycle|Collecting duct acid secretion|Vibrio cholerae infection|Epithelial cell signaling in Helicobacter pylori infection|Tuberculosis|Rheumatoid arthritis
Gohir.A05G299300	A05	39989620	39989856	237	GhZFPH4_DAP-vs-GhZFPH4_neg_peak_1698	4.41097	6.96653	3.03629	1.08E-07	0.000919835	Distal Intergenic	39995536	39997127	1592	1	Gohir.A05G299300.2	-5680	-	-	-	-	-	-	-	-
Gohir.A10G118780	A10	58948589	58948757	169	GhZFPH4_DAP-vs-GhZFPH4_neg_peak_3787	4.41097	6.96653	3.03629	1.08E-07	0.000919835	Distal Intergenic	58902879	58904228	1350	2	Gohir.A10G118780.1	-44361	IPR000719,IPR004041,IPR011009,IPR018451	Protein kinase domain|NAF domain|Protein kinase-like domain superfamily|NAF/FISL domain	K12761	carbon catabolite-derepressing protein kinase [EC:2.7.11.1]	GO:0004672,GO:0005524,GO:0006468,GO:0007165	protein kinase activity|ATP binding|protein phosphorylation|signal transduction	ko01522,ko04113,ko04138	Endocrine resistance|Meiosis - yeast|Autophagy - yeast
Gohir.A11G209900	A11	58953324	58953431	108	GhZFPH4_DAP-vs-GhZFPH4_neg_peak_4153	4.41097	6.96653	3.03629	1.08E-07	0.000919835	Distal Intergenic	58819702	58821671	1970	2	Gohir.A11G209900.1	-131653	IPR011598,IPR036638	Myc-type, basic helix-loop-helix (bHLH) domain|Helix-loop-helix DNA-binding domain superfamily	-	-	GO:0046983	protein dimerization activity	-	-
Gohir.D06G136900	D06	48611857	48612058	202	GhZFPH4_DAP-vs-GhZFPH4_neg_peak_6445	4.41097	6.96653	3.03629	1.08E-07	0.000919835	Distal Intergenic	48540302	48543345	3044	2	Gohir.D06G136900.1	-68512	IPR011989,IPR016024	Armadillo-like helical|Armadillo-type fold	-	-	-	-	-	-
Gohir.D07G179500	D07	43692139	43692292	154	GhZFPH4_DAP-vs-GhZFPH4_neg_peak_6654	4.41097	6.96653	3.03629	1.08E-07	0.000919835	Distal Intergenic	43904917	43905513	597	2	Gohir.D07G179500.2	213221	IPR012552	DVL	-	-	-	-	-	-
Gohir.D11G234900	D11	47995468	47995800	333	GhZFPH4_DAP-vs-GhZFPH4_neg_peak_7504	4.41097	6.96653	3.03629	1.08E-07	0.000919835	Distal Intergenic	48025506	48037634	12129	2	Gohir.D11G234900.1	41834	-	-	K18670	dual specificity protein kinase YAK1 [EC:2.7.12.1]	GO:0004672,GO:0005524,GO:0006468	protein kinase activity|ATP binding|protein phosphorylation	ko01522	Endocrine resistance
Gohir.D05G316800	D05	44005810	44006080	271	GhZFPH4_DAP-vs-GhZFPH4_neg_peak_6189	4.40777	7.23908	3.28681	5.77E-08	0.000516642	Distal Intergenic	44716651	44720753	4103	1	Gohir.D05G316800.1	-710571	-	-	-	-	-	-	-	-
Gohir.A13G158466	A13	100650535	100650706	172	GhZFPH4_DAP-vs-GhZFPH4_neg_peak_5108	4.4054	7.30978	3.34594	4.90E-08	0.000450879	Distal Intergenic	100631527	100635226	3700	2	Gohir.A13G158466.1	-15309	IPR003480,IPR023213	Transferase|Chloramphenicol acetyltransferase-like domain superfamily	-	-	GO:0016747	transferase activity, transferring acyl groups other than amino-acyl groups	-	-
Gohir.A01G204800	A01	116477359	116477491	133	GhZFPH4_DAP-vs-GhZFPH4_neg_peak_421	4.39705	6.94281	3.01466	1.14E-07	0.000966807	Distal Intergenic	116459098	116460830	1733	2	Gohir.A01G204800.1	-16529	IPR003441,IPR036093	NAC domain|NAC domain superfamily	-	-	GO:0003677,GO:0006355	DNA binding|regulation of transcription, DNA-templated	-	-
Gohir.A04G050600	A04	15162516	15162715	200	GhZFPH4_DAP-vs-GhZFPH4_neg_peak_1321	4.39705	6.94281	3.01466	1.14E-07	0.000966807	Distal Intergenic	15152067	15155544	3478	1	Gohir.A04G050600.2	10449	IPR005176,IPR014764	Potentiating neddylation domain|Defective-in-cullin neddylation protein	-	-	-	-	-	-
Gohir.A09G056900	A09	53911754	53911931	178	GhZFPH4_DAP-vs-GhZFPH4_neg_peak_3419	4.39705	6.94281	3.01466	1.14E-07	0.000966807	Distal Intergenic	53839121	53842388	3268	2	Gohir.A09G056900.1	-69366	IPR001593,IPR027500	Ribosomal protein S3Ae|40S ribosomal protein S1/3, eukaryotes	K02984	small subunit ribosomal protein S3Ae	GO:0003735,GO:0005840,GO:0006412	structural constituent of ribosome|ribosome|translation	ko01522,ko03010	Endocrine resistance|Ribosome
Gohir.A11G211500	A11	60814914	60815019	106	GhZFPH4_DAP-vs-GhZFPH4_neg_peak_4160	4.39705	6.94281	3.01466	1.14E-07	0.000966807	Distal Intergenic	60825623	60829878	4256	2	Gohir.A11G211500.1	14859	IPR029063	S-adenosyl-L-methionine-dependent methyltransferase	K23871	putative pectin methylesterase [EC:2.1.1.-]	-	-	ko01522	Endocrine resistance
Gohir.A12G086200	A12	37588921	37589162	242	GhZFPH4_DAP-vs-GhZFPH4_neg_peak_4483	4.39705	6.94281	3.01466	1.14E-07	0.000966807	Distal Intergenic	37428931	37432002	3072	1	Gohir.A12G086200.1	159990	IPR000719,IPR011009	Protein kinase domain|Protein kinase-like domain superfamily	-	-	GO:0004672,GO:0005524,GO:0006468	protein kinase activity|ATP binding|protein phosphorylation	-	-
Gohir.A13G122100	A13	87817149	87817306	158	GhZFPH4_DAP-vs-GhZFPH4_neg_peak_5070	4.39705	6.94281	3.01466	1.14E-07	0.000966807	Distal Intergenic	87873527	87879824	6298	1	Gohir.A13G122100.3	-56221	IPR007305	Vesicle transport protein, Got1/SFT2-like	-	-	GO:0016192	vesicle-mediated transport	-	-
Gohir.D02G101500	D02	24692761	24692952	192	GhZFPH4_DAP-vs-GhZFPH4_neg_peak_5479	4.39705	6.94281	3.01466	1.14E-07	0.000966807	Distal Intergenic	24680590	24684471	3882	2	Gohir.D02G101500.1	-8290	-	-	-	-	-	-	ko00510,ko00513,ko04141	N-Glycan biosynthesis|Various types of N-glycan biosynthesis|Protein processing in endoplasmic reticulum
Gohir.A02G125900	A02	94281554	94281817	264	GhZFPH4_DAP-vs-GhZFPH4_neg_peak_770	4.39232	7.28658	3.32437	5.17E-08	0.000473838	Distal Intergenic	94246445	94254506	8062	1	Gohir.A02G125900.4	35109	-	-	-	-	-	-	ko01522	Endocrine resistance
Gohir.D03G067500	D03	20045423	20045606	184	GhZFPH4_DAP-vs-GhZFPH4_neg_peak_5729	4.39232	7.28658	3.32437	5.17E-08	0.000473838	Distal Intergenic	20002008	20007124	5117	1	Gohir.D03G067500.1	43415	IPR002498,IPR003409,IPR017163,IPR023610,IPR027484	Phosphatidylinositol-4-phosphate 5-kinase, core|MORN motif|Phosphatidylinositol-4-phosphate 5-kinase, plant|Phosphatidylinositol-4-phosphate 5-kinase|Phosphatidylinositol-4-phosphate 5-kinase, N-terminal	K00889	1-phosphatidylinositol-4-phosphate 5-kinase [EC:2.7.1.68]	GO:0005524,GO:0016307,GO:0016308,GO:0046488	ATP binding|phosphatidylinositol phosphate kinase activity|1-phosphatidylinositol-4-phosphate 5-kinase activity|phosphatidylinositol metabolic process	ko00562,ko01522,ko04011,ko04070,ko04072,ko04139,ko04144,ko04666,ko04810,ko05135	Inositol phosphate metabolism|Endocrine resistance|MAPK signaling pathway - yeast|Phosphatidylinositol signaling system|Phospholipase D signaling pathway|Mitophagy - yeast|Endocytosis|Fc gamma R-mediated phagocytosis|Regulation of actin cytoskeleton|Yersinia infection
Gohir.D11G260100	D11	57763401	57763599	199	GhZFPH4_DAP-vs-GhZFPH4_neg_peak_7534	4.39232	7.28658	3.32437	5.17E-08	0.000473838	Distal Intergenic	57754234	57755307	1074	2	Gohir.D11G260100.1	-8094	-	-	-	-	-	-	-	-
Gohir.A01G097100	A01	16906999	16907125	127	GhZFPH4_DAP-vs-GhZFPH4_neg_peak_46	4.38321	6.91921	2.99275	1.20E-07	0.00101683	Intron (Gohir.A01G097200.1/Gohir.A01G097200, intron 9 of 11)	16888377	16903489	15113	2	Gohir.A01G097100.2	-3510	IPR004331,IPR004342	SPX domain|EXS, C-terminal	-	-	GO:0016021	integral component of membrane	-	-
Gohir.A04G053900	A04	33783995	33784126	132	GhZFPH4_DAP-vs-GhZFPH4_neg_peak_1376	4.38321	6.91921	2.99275	1.20E-07	0.00101683	Distal Intergenic	33867200	33885302	18103	1	Gohir.A04G053900.3	-83074	IPR001752,IPR027417,IPR027640,IPR036961	Kinesin motor domain|P-loop containing nucleoside triphosphate hydrolase|Kinesin-like protein|Kinesin motor domain superfamily	K11498	centromeric protein E	GO:0003777,GO:0005524,GO:0007018,GO:0008017	microtubule motor activity|ATP binding|microtubule-based movement|microtubule binding	ko01522	Endocrine resistance
Gohir.A05G227500	A05	23209307	23209438	132	GhZFPH4_DAP-vs-GhZFPH4_neg_peak_1654	4.38321	6.91921	2.99275	1.20E-07	0.00101683	Promoter (2-3kb)	23204234	23207092	2859	2	Gohir.A05G227500.2	-2215	IPR025131	Domain of unknown function DUF4057	-	-	-	-	-	-
Gohir.A05G276000	A05	32442179	32442310	132	GhZFPH4_DAP-vs-GhZFPH4_neg_peak_1672	4.38321	6.91921	2.99275	1.20E-07	0.00101683	Distal Intergenic	32456699	32457921	1223	1	Gohir.A05G276000.1	-14389	IPR006514,IPR021148	IRX15/IRX15L/IGXM|Polysaccharide biosynthesis domain	K18801	glucuronoxylan 4-O-methyltransferase [EC:2.1.1.112]	GO:0045492	xylan biosynthetic process	ko01522	Endocrine resistance
Gohir.A05G356100	A05	98975270	98975405	136	GhZFPH4_DAP-vs-GhZFPH4_neg_peak_1911	4.38321	6.91921	2.99275	1.20E-07	0.00101683	Distal Intergenic	99009551	99011218	1668	1	Gohir.A05G356100.1	-34146	IPR004883	Lateral organ boundaries, LOB	-	-	-	-	-	-
Gohir.A06G125702	A06	90367862	90368187	326	GhZFPH4_DAP-vs-GhZFPH4_neg_peak_2270	4.38321	6.91921	2.99275	1.20E-07	0.00101683	Distal Intergenic	90493736	90500477	6742	2	Gohir.A06G125702.1	132290	IPR006568,IPR007180	PSP, proline-rich|Domain of unknown function DUF382	K12829	splicing factor 3B subunit 2	GO:0005634	nucleus	ko01522,ko03040	Endocrine resistance|Spliceosome
Gohir.A06G137802	A06	108914263	108914486	224	GhZFPH4_DAP-vs-GhZFPH4_neg_peak_2316	4.38321	6.91921	2.99275	1.20E-07	0.00101683	Distal Intergenic	108751691	108752374	684	1	Gohir.A06G137802.1	162572	-	-	-	-	-	-	-	-
Gohir.A07G165078	A07	65755930	65756078	149	GhZFPH4_DAP-vs-GhZFPH4_neg_peak_2596	4.38321	6.91921	2.99275	1.20E-07	0.00101683	Distal Intergenic	65870966	65871837	872	2	Gohir.A07G165078.1	115759	-	-	-	-	-	-	-	-
Gohir.A08G047650	A08	6722175	6722362	188	GhZFPH4_DAP-vs-GhZFPH4_neg_peak_2751	4.38321	6.91921	2.99275	1.20E-07	0.00101683	Distal Intergenic	6717040	6719530	2491	1	Gohir.A08G047650.1	5135	IPR001971,IPR036967	Ribosomal protein S11|Ribosomal protein S11 superfamily	-	-	GO:0003735,GO:0005840,GO:0006412	structural constituent of ribosome|ribosome|translation	-	-
Gohir.A08G180300	A08	117971696	117971813	118	GhZFPH4_DAP-vs-GhZFPH4_neg_peak_3102	4.38321	6.91921	2.99275	1.20E-07	0.00101683	Promoter (2-3kb)	117968779	117969414	636	2	Gohir.A08G180300.1	-2282	IPR003958,IPR009072	Transcription factor CBF/NF-Y/archaeal histone domain|Histone-fold	-	-	GO:0046982	protein heterodimerization activity	-	-
Gohir.A09G032200	A09	13376852	13377015	164	GhZFPH4_DAP-vs-GhZFPH4_neg_peak_3226	4.38321	6.91921	2.99275	1.20E-07	0.00101683	Distal Intergenic	13308127	13312885	4759	2	Gohir.A09G032200.1	-63967	-	-	K20781	peptidyl serine alpha-galactosyltransferase [EC:2.4.1.-]	-	-	ko00514,ko01522	Other types of O-glycan biosynthesis|Endocrine resistance
Gohir.A09G240900	A09	84633694	84633878	185	GhZFPH4_DAP-vs-GhZFPH4_neg_peak_3576	4.38321	6.91921	2.99275	1.20E-07	0.00101683	Promoter (1-2kb)	84632421	84634124	1704	1	Gohir.A09G240900.1	1273	IPR003657,IPR036576	WRKY domain|WRKY domain superfamily	-	-	GO:0003700,GO:0006355,GO:0043565	DNA-binding transcription factor activity|regulation of transcription, DNA-templated|sequence-specific DNA binding	-	-
Gohir.A10G083300	A10	14029935	14030144	210	GhZFPH4_DAP-vs-GhZFPH4_neg_peak_3618	4.38321	6.91921	2.99275	1.20E-07	0.00101683	Distal Intergenic	14021787	14022347	561	2	Gohir.A10G083300.1	-7588	-	-	-	-	-	-	-	-
Gohir.A10G115900	A10	53469184	53469335	152	GhZFPH4_DAP-vs-GhZFPH4_neg_peak_3760	4.38321	6.91921	2.99275	1.20E-07	0.00101683	Distal Intergenic	53559345	53564461	5117	1	Gohir.A10G115900.1	-90010	IPR001902,IPR002645,IPR011547,IPR036513	SLC26A/SulP transporter|STAS domain|SLC26A/SulP transporter domain|STAS domain superfamily	-	-	GO:0008271,GO:0008272,GO:0015116,GO:0016020,GO:0016021,GO:0055085	secondary active sulfate transmembrane transporter activity|sulfate transport|sulfate transmembrane transporter activity|membrane|integral component of membrane|transmembrane transport	ko01522	Endocrine resistance
Gohir.A10G122500	A10	65680861	65681009	149	GhZFPH4_DAP-vs-GhZFPH4_neg_peak_3806	4.38321	6.91921	2.99275	1.20E-07	0.00101683	Distal Intergenic	65582761	65589063	6303	1	Gohir.A10G122500.2	98100	IPR006775,IPR008928,IPR012341,IPR014551,IPR024462	Glycosyl-hydrolase family 116, catalytic region|Six-hairpin glycosidase superfamily|Six-hairpin glycosidase-like superfamily|Beta-glucosidase GBA2-type|Glycosyl-hydrolase family 116, N-terminal	K17108	non-lysosomal glucosylceramidase [EC:3.2.1.45]	GO:0003824,GO:0004348,GO:0004553,GO:0006680,GO:0016020	catalytic activity|glucosylceramidase activity|hydrolase activity, hydrolyzing O-glycosyl compounds|glucosylceramide catabolic process|membrane	ko00511,ko00600	Other glycan degradation|Sphingolipid metabolism
Gohir.A10G129450	A10	73185431	73185543	113	GhZFPH4_DAP-vs-GhZFPH4_neg_peak_3839	4.38321	6.91921	2.99275	1.20E-07	0.00101683	Promoter (<=1kb)	73185075	73185751	677	1	Gohir.A10G129450.1	356	-	-	-	-	-	-	-	-
Gohir.A13G105400	A13	72813742	72814148	407	GhZFPH4_DAP-vs-GhZFPH4_neg_peak_5020	4.38321	6.91921	2.99275	1.20E-07	0.00101683	Distal Intergenic	72564254	72565537	1284	1	Gohir.A13G105400.1	249488	IPR007592	GLABROUS1 enhancer-binding protein family	-	-	GO:0006355	regulation of transcription, DNA-templated	-	-
Gohir.D02G085200	D02	15366887	15367060	174	GhZFPH4_DAP-vs-GhZFPH4_neg_peak_5447	4.38321	6.91921	2.99275	1.20E-07	0.00101683	Intron (Gohir.D02G085200.8/Gohir.D02G085200, intron 10 of 23)	15362931	15379674	16744	1	Gohir.D02G085200.15	3956	-	-	-	-	-	-	-	-
Gohir.D02G100800	D02	24316060	24316211	152	GhZFPH4_DAP-vs-GhZFPH4_neg_peak_5477	4.38321	6.91921	2.99275	1.20E-07	0.00101683	Distal Intergenic	24372527	24376009	3483	2	Gohir.D02G100800.2	59798	-	-	-	-	-	-	ko01522	Endocrine resistance
Gohir.D02G112400	D02	35529268	35529524	257	GhZFPH4_DAP-vs-GhZFPH4_neg_peak_5521	4.38321	6.91921	2.99275	1.20E-07	0.00101683	Distal Intergenic	35262511	35271400	8890	1	Gohir.D02G112400.1	266757	-	-	-	-	-	-	ko04626	Plant-pathogen interaction
Gohir.D06G060300	D06	10033449	10033588	140	GhZFPH4_DAP-vs-GhZFPH4_neg_peak_6312	4.38321	6.91921	2.99275	1.20E-07	0.00101683	Promoter (1-2kb)	10031878	10033820	1943	1	Gohir.D06G060300.2	1571	IPR001806,IPR005225,IPR027417	Small GTPase|Small GTP-binding protein domain|P-loop containing nucleoside triphosphate hydrolase	K07888	Ras-related protein Rab-5B	GO:0003924,GO:0005525	GTPase activity|GTP binding	ko01522,ko04014,ko04144,ko04145,ko04962,ko05132,ko05146,ko05152	Endocrine resistance|Ras signaling pathway|Endocytosis|Phagosome|Vasopressin-regulated water reabsorption|Salmonella infection|Amoebiasis|Tuberculosis
Gohir.D08G095250	D08	19361240	19361366	127	GhZFPH4_DAP-vs-GhZFPH4_neg_peak_6777	4.38321	6.91921	2.99275	1.20E-07	0.00101683	Distal Intergenic	19371759	19379998	8240	1	Gohir.D08G095250.2	-10393	IPR000270,IPR000719,IPR001245,IPR011009	PB1 domain|Protein kinase domain|Serine-threonine/tyrosine-protein kinase, catalytic domain|Protein kinase-like domain superfamily	-	-	GO:0004672,GO:0005515,GO:0005524,GO:0006468	protein kinase activity|protein binding|ATP binding|protein phosphorylation	-	-
Gohir.A01G045600	A01	4338342	4338727	386	GhZFPH4_DAP-vs-GhZFPH4_neg_peak_12	4.37932	7.2635	3.30946	5.45E-08	0.000490388	Distal Intergenic	4351687	4351947	261	1	Gohir.A01G045600.1	-12960	IPR025558	Domain of unknown function DUF4283	-	-	-	-	-	-
Gohir.A01G150800	A01	89596688	89596854	167	GhZFPH4_DAP-vs-GhZFPH4_neg_peak_332	4.37932	7.2635	3.30946	5.45E-08	0.000490388	Distal Intergenic	89603641	89604726	1086	1	Gohir.A01G150800.1	-6787	IPR000916,IPR023393	Bet v I/Major latex protein|START-like domain superfamily	-	-	GO:0006952	defense response	-	-
Gohir.A02G108700	A02	55271969	55272232	264	GhZFPH4_DAP-vs-GhZFPH4_neg_peak_630	4.37932	7.2635	3.30946	5.45E-08	0.000490388	Distal Intergenic	55279485	55286436	6952	2	Gohir.A02G108700.1	14204	-	-	K12479	vacuolar protein sorting-associated protein 45	-	-	ko01522,ko04138,ko04144	Endocrine resistance|Autophagy - yeast|Endocytosis
Gohir.A03G033200	A03	6341375	6341502	128	GhZFPH4_DAP-vs-GhZFPH4_neg_peak_848	4.37932	7.2635	3.30946	5.45E-08	0.000490388	Distal Intergenic	6355169	6360937	5769	2	Gohir.A03G033200.1	19435	IPR001356,IPR002913,IPR009057,IPR013978,IPR023393	Homeobox domain|START domain|Homeobox-like domain superfamily|MEKHLA|START-like domain superfamily	K09338	homeobox-leucine zipper protein	GO:0003677,GO:0008289	DNA binding|lipid binding	ko01522	Endocrine resistance
Gohir.A03G072600	A03	20829274	20829427	154	GhZFPH4_DAP-vs-GhZFPH4_neg_peak_890	4.37932	7.2635	3.30946	5.45E-08	0.000490388	Distal Intergenic	20738903	20741652	2750	1	Gohir.A03G072600.1	90371	IPR001841,IPR013083	Zinc finger, RING-type|Zinc finger, RING/FYVE/PHD-type	-	-	-	-	-	-
Gohir.A09G037100	A09	33154316	33154540	225	GhZFPH4_DAP-vs-GhZFPH4_neg_peak_3320	4.37932	7.2635	3.30946	5.45E-08	0.000490388	Distal Intergenic	33033142	33034253	1112	2	Gohir.A09G037100.1	-120063	IPR021775	Protein of unknown function DUF3339	-	-	-	-	-	-
Gohir.A13G052800	A13	9624755	9625017	263	GhZFPH4_DAP-vs-GhZFPH4_neg_peak_4791	4.37932	7.2635	3.30946	5.45E-08	0.000490388	Distal Intergenic	9799739	9802639	2901	2	Gohir.A13G052800.1	177622	IPR011598,IPR036638	Myc-type, basic helix-loop-helix (bHLH) domain|Helix-loop-helix DNA-binding domain superfamily	-	-	GO:0046983	protein dimerization activity	-	-
Gohir.A13G092605	A13	62979790	62979907	118	GhZFPH4_DAP-vs-GhZFPH4_neg_peak_4985	4.37932	7.2635	3.30946	5.45E-08	0.000490388	Distal Intergenic	63173454	63174149	696	1	Gohir.A13G092605.1	-193547	IPR003544	Cytochrome c-type biogenesis protein CcmB	-	-	GO:0015232,GO:0015886,GO:0016020,GO:0017004	heme transporter activity|heme transport|membrane|cytochrome complex assembly	-	-
Gohir.D05G358400	D05	60744370	60744536	167	GhZFPH4_DAP-vs-GhZFPH4_neg_peak_6248	4.37932	7.2635	3.30946	5.45E-08	0.000490388	Distal Intergenic	60770530	60771414	885	1	Gohir.D05G358400.1	-25994	-	-	-	-	-	-	-	-
Gohir.A08G195800	A08	120527611	120527854	244	GhZFPH4_DAP-vs-GhZFPH4_neg_peak_3108	4.37586	7.60887	3.62412	2.46E-08	0.000237618	Distal Intergenic	120533904	120534451	548	2	Gohir.A08G195800.1	6597	-	-	-	-	-	-	-	-
Gohir.D01G171200	D01	58026769	58026920	152	GhZFPH4_DAP-vs-GhZFPH4_neg_peak_5381	4.37586	7.60887	3.62412	2.46E-08	0.000237618	Promoter (<=1kb)	58027012	58027819	808	1	Gohir.D01G171200.1	-92	IPR011989,IPR016024	Armadillo-like helical|Armadillo-type fold	-	-	-	-	-	-
Gohir.D07G179475	D07	43272327	43272437	111	GhZFPH4_DAP-vs-GhZFPH4_neg_peak_6652	4.37586	7.60887	3.62412	2.46E-08	0.000237618	Distal Intergenic	43156896	43157980	1085	1	Gohir.D07G179475.1	115431	-	-	-	-	-	-	-	-
Gohir.A06G103100	A06	42810077	42810194	118	GhZFPH4_DAP-vs-GhZFPH4_neg_peak_2072	4.36999	7.52868	3.54959	2.96E-08	0.000282104	Distal Intergenic	42707956	42711290	3335	2	Gohir.A06G103100.2	-98787	IPR000608,IPR016135	Ubiquitin-conjugating enzyme E2|Ubiquitin-conjugating enzyme/RWD-like	K20217	ubiquitin-conjugating enzyme E2 E [EC:2.3.2.23]	-	-	ko01522,ko04120	Endocrine resistance|Ubiquitin mediated proteolysis
Gohir.A12G081099	A12	27859833	27860114	282	GhZFPH4_DAP-vs-GhZFPH4_neg_peak_4449	4.36999	7.52868	3.54959	2.96E-08	0.000282104	Distal Intergenic	27432945	27433448	504	1	Gohir.A12G081099.1	426888	IPR007112,IPR009009,IPR036908	Expansin/pollen allergen, DPBB domain|RlpA-like protein, double-psi beta-barrel domain|RlpA-like domain superfamily	-	-	-	-	-	-
Gohir.A01G127800	A01	36373313	36373489	177	GhZFPH4_DAP-vs-GhZFPH4_neg_peak_118	4.36946	6.89573	2.97336	1.27E-07	0.00106326	Promoter (2-3kb)	36375797	36378768	2972	1	Gohir.A01G127800.1	-2308	IPR006671,IPR036915,IPR043198	Cyclin, N-terminal|Cyclin-like superfamily|Cyclin/Cyclin-like subunit Ssn8	-	-	GO:0006357,GO:0016538,GO:0042025	regulation of transcription by RNA polymerase II|cyclin-dependent protein serine/threonine kinase regulator activity|host cell nucleus	-	-
Gohir.A05G311200	A05	49484703	49484985	283	GhZFPH4_DAP-vs-GhZFPH4_neg_peak_1736	4.36946	6.89573	2.97336	1.27E-07	0.00106326	Distal Intergenic	49354529	49358155	3627	2	Gohir.A05G311200.3	-126548	IPR005516	Remorin, C-terminal	-	-	-	-	-	-
Gohir.A08G109700	A08	83442400	83442638	239	GhZFPH4_DAP-vs-GhZFPH4_neg_peak_3007	4.36946	6.89573	2.97336	1.27E-07	0.00106326	Distal Intergenic	83325747	83327980	2234	2	Gohir.A08G109700.1	-114420	IPR003441,IPR036093	NAC domain|NAC domain superfamily	-	-	GO:0003677,GO:0006355	DNA binding|regulation of transcription, DNA-templated	-	-
Gohir.A08G236300	A08	125995763	125996040	278	GhZFPH4_DAP-vs-GhZFPH4_neg_peak_3124	4.36946	6.89573	2.97336	1.27E-07	0.00106326	Promoter (2-3kb)	125999025	126004598	5574	1	Gohir.A08G236300.1	-2985	IPR003890,IPR003891,IPR016021,IPR016024	MIF4G-like, type 3|Initiation factor eIF-4 gamma, MA3|MIF4G-like domain superfamily|Armadillo-type fold	K03260	translation initiation factor 4G	GO:0003723,GO:0005515	RNA binding|protein binding	ko01522,ko03013,ko05416	Endocrine resistance|RNA transport|Viral myocarditis
Gohir.A11G224000	A11	88243091	88243217	127	GhZFPH4_DAP-vs-GhZFPH4_neg_peak_4253	4.36946	6.89573	2.97336	1.27E-07	0.00106326	Distal Intergenic	88220801	88221776	976	2	Gohir.A11G224000.2	-21315	IPR009071,IPR036910	High mobility group box domain|High mobility group box domain superfamily	-	-	-	-	-	-
Gohir.D01G127100	D01	32503564	32503753	190	GhZFPH4_DAP-vs-GhZFPH4_neg_peak_5298	4.36946	6.89573	2.97336	1.27E-07	0.00106326	Distal Intergenic	32482122	32483152	1031	2	Gohir.D01G127100.1	-20412	IPR006459,IPR006702	Casparian strip membrane protein|Casparian strip membrane protein domain	-	-	-	-	-	-
Gohir.D03G074900	D03	29444763	29444915	153	GhZFPH4_DAP-vs-GhZFPH4_neg_peak_5762	4.36946	6.89573	2.97336	1.27E-07	0.00106326	Promoter (2-3kb)	29442181	29454598	12418	1	Gohir.D03G074900.17	2582	IPR003034,IPR004808,IPR005135,IPR036361,IPR036691	SAP domain|AP endonuclease 1|Endonuclease/exonuclease/phosphatase|SAP domain superfamily|Endonuclease/exonuclease/phosphatase superfamily	K01142	exodeoxyribonuclease III [EC:3.1.11.2]	GO:0004518,GO:0006281	nuclease activity|DNA repair	ko01522,ko03410	Endocrine resistance|Base excision repair
Gohir.A12G081099	A12	27895046	27895208	163	GhZFPH4_DAP-vs-GhZFPH4_neg_peak_4450	4.36747	7.88055	3.87649	1.32E-08	0.000132895	Distal Intergenic	27432945	27433448	504	1	Gohir.A12G081099.1	462101	IPR007112,IPR009009,IPR036908	Expansin/pollen allergen, DPBB domain|RlpA-like protein, double-psi beta-barrel domain|RlpA-like domain superfamily	-	-	-	-	-	-
Gohir.D08G104600	D08	28499921	28500109	189	GhZFPH4_DAP-vs-GhZFPH4_neg_peak_6805	4.36747	7.88055	3.87649	1.32E-08	0.000132895	Distal Intergenic	28768010	28768237	228	2	Gohir.D08G104600.1	268128	-	-	-	-	-	-	-	-
Gohir.D05G131500	D05	11248465	11249146	682	GhZFPH4_DAP-vs-GhZFPH4_neg_peak_6102	4.36519	8.23224	4.20261	5.86E-09	6.27E-05	Distal Intergenic	11258110	11269089	10980	1	Gohir.D05G131500.4	-8964	-	-	K20286	TATA element modulatory factor	-	-	ko01522	Endocrine resistance
Gohir.D01G151400	D01	51973121	51973311	191	GhZFPH4_DAP-vs-GhZFPH4_neg_peak_5359	4.3558	6.87238	2.95168	1.34E-07	0.00111769	Distal Intergenic	51921163	51924472	3310	2	Gohir.D01G151400.1	-48649	IPR011333,IPR027356,IPR043454	SKP1/BTB/POZ domain superfamily|NPH3 domain|NPH3/RPT2-like family	-	-	-	-	-	-
Gohir.D13G145801	D13	50924015	50924388	374	GhZFPH4_DAP-vs-GhZFPH4_neg_peak_7941	4.3558	6.87238	2.95168	1.34E-07	0.00111769	Distal Intergenic	50933714	50934665	952	1	Gohir.D13G145801.1	-9326	-	-	-	-	-	-	-	-
Gohir.A10G118400	A10	56803062	56803369	308	GhZFPH4_DAP-vs-GhZFPH4_neg_peak_3774	4.35354	7.21768	3.26688	6.06E-08	0.000540904	Distal Intergenic	56476267	56477846	1580	2	Gohir.A10G118400.2	-325216	IPR015270,IPR036319	Protein RDM1, plant|RDM1 superfamily	-	-	GO:0005634,GO:0044030	nucleus|regulation of DNA methylation	-	-
Gohir.D13G109000	D13	37059695	37060125	431	GhZFPH4_DAP-vs-GhZFPH4_neg_peak_7893	4.35354	7.21768	3.26688	6.06E-08	0.000540904	Distal Intergenic	37041290	37049826	8537	1	Gohir.D13G109000.4	18405	-	-	-	-	GO:0005515	protein binding	ko01522,ko03460	Endocrine resistance|Fanconi anemia pathway
Gohir.D03G055050	D03	10219075	10219295	221	GhZFPH4_DAP-vs-GhZFPH4_neg_peak_5697	4.34412	8.54399	4.49464	2.86E-09	3.20E-05	Distal Intergenic	10227662	10228647	986	1	Gohir.D03G055050.1	-8367	-	-	-	-	-	-	-	-
Gohir.A07G178400	A07	82144502	82144632	131	GhZFPH4_DAP-vs-GhZFPH4_neg_peak_2650	4.34222	6.84916	2.93031	1.42E-07	0.00117406	Promoter (<=1kb)	82134789	82144141	9353	2	Gohir.A07G178400.3	-361	-	-	-	-	-	-	-	-
Gohir.D05G318100	D05	45709695	45709850	156	GhZFPH4_DAP-vs-GhZFPH4_neg_peak_6198	4.34222	6.84916	2.93031	1.42E-07	0.00117406	Distal Intergenic	45780649	45785603	4955	1	Gohir.D05G318100.1	-70799	-	-	-	-	-	-	-	-
Gohir.D13G100100	D13	32143279	32143641	363	GhZFPH4_DAP-vs-GhZFPH4_neg_peak_7875	4.34222	6.84916	2.93031	1.42E-07	0.00117406	Distal Intergenic	32226785	32230381	3597	1	Gohir.D13G100100.1	-83144	-	-	-	-	GO:0005509	calcium ion binding	-	-
Gohir.D13G106101	D13	35086685	35086858	174	GhZFPH4_DAP-vs-GhZFPH4_neg_peak_7885	4.34222	6.84916	2.93031	1.42E-07	0.00117406	Intron (Gohir.D13G106101.1/Gohir.D13G106101, intron 17 of 29)	35078800	35094758	15959	2	Gohir.D13G106101.1	7900	-	-	K05749	cytoplasmic FMR1 interacting protein	GO:0030833,GO:0048365	regulation of actin filament polymerization|Rac GTPase binding	ko01522,ko03013,ko04810,ko05130,ko05132	Endocrine resistance|RNA transport|Regulation of actin cytoskeleton|Pathogenic Escherichia coli infection|Salmonella infection
Gohir.A11G189066	A11	29543371	29543516	146	GhZFPH4_DAP-vs-GhZFPH4_neg_peak_4063	4.34077	7.19494	3.24599	6.38E-08	0.000567558	Distal Intergenic	29551242	29552207	966	2	Gohir.A11G189066.1	8691	IPR001584,IPR012337,IPR036397	Integrase, catalytic core|Ribonuclease H-like superfamily|Ribonuclease H superfamily	-	-	GO:0003676,GO:0015074	nucleic acid binding|DNA integration	-	-
Gohir.D13G097300	D13	26583381	26583560	180	GhZFPH4_DAP-vs-GhZFPH4_neg_peak_7844	4.34077	7.19494	3.24599	6.38E-08	0.000567558	Promoter (1-2kb)	26584979	26588157	3179	1	Gohir.D13G097300.1	-1419	-	-	-	-	-	-	-	-
Gohir.A02G082400	A02	21809105	21809339	235	GhZFPH4_DAP-vs-GhZFPH4_neg_peak_493	4.32873	6.82605	2.90877	1.49E-07	0.00123376	Distal Intergenic	21784654	21788263	3610	2	Gohir.A02G082400.1	-20842	-	-	-	-	-	-	-	-
Gohir.A03G060300	A03	15077504	15077711	208	GhZFPH4_DAP-vs-GhZFPH4_neg_peak_871	4.32873	6.82605	2.90877	1.49E-07	0.00123376	Distal Intergenic	15087933	15090833	2901	2	Gohir.A03G060300.1	13122	IPR001806,IPR005225,IPR027417	Small GTPase|Small GTP-binding protein domain|P-loop containing nucleoside triphosphate hydrolase	K07874	Ras-related protein Rab-1A	GO:0003924,GO:0005525	GTPase activity|GTP binding	ko01522,ko04140,ko05130,ko05134	Endocrine resistance|Autophagy - animal|Pathogenic Escherichia coli infection|Legionellosis
Gohir.A06G072300	A06	17947951	17948194	244	GhZFPH4_DAP-vs-GhZFPH4_neg_peak_2003	4.32873	6.82605	2.90877	1.49E-07	0.00123376	Exon (Gohir.A06G072300.1/Gohir.A06G072300, exon 11 of 13)	17946603	17951627	5025	2	Gohir.A06G072300.1	3433	-	-	-	-	-	-	-	-
Gohir.A10G120400	A10	61977959	61978096	138	GhZFPH4_DAP-vs-GhZFPH4_neg_peak_3795	4.32873	6.82605	2.90877	1.49E-07	0.00123376	Distal Intergenic	62008843	62013715	4873	1	Gohir.A10G120400.1	-30747	IPR005016	Serine incorporator/TMS membrane protein	K23544	serine incorporator 1/3	GO:0016020	membrane	ko01522	Endocrine resistance
Gohir.A11G200400	A11	42870023	42870146	124	GhZFPH4_DAP-vs-GhZFPH4_neg_peak_4099	4.32873	6.82605	2.90877	1.49E-07	0.00123376	Distal Intergenic	42567377	42571684	4308	2	Gohir.A11G200400.1	-298339	IPR002655,IPR006091,IPR009075,IPR009100,IPR012258,IPR036250	Acyl-CoA oxidase, C-terminal|Acyl-CoA oxidase/dehydrogenase, central domain|Acyl-CoA dehydrogenase/oxidase C-terminal|Acyl-CoA dehydrogenase/oxidase, N-terminal and middle domain superfamily|Acyl-CoA oxidase|Acyl-CoA dehydrogenase-like, C-terminal	K00232	acyl-CoA oxidase [EC:1.3.3.6]	GO:0003997,GO:0005777,GO:0006631,GO:0006635,GO:0016627,GO:0055114,GO:0071949	acyl-CoA oxidase activity|peroxisome|fatty acid metabolic process|fatty acid beta-oxidation|oxidoreductase activity, acting on the CH-CH group of donors|oxidation-reduction process|FAD binding	ko00071,ko00410,ko00592,ko00640,ko01040,ko03320,ko04024,ko04146	Fatty acid degradation|beta-Alanine metabolism|alpha-Linolenic acid metabolism|Propanoate metabolism|Biosynthesis of unsaturated fatty acids|PPAR signaling pathway|cAMP signaling pathway|Peroxisome
Gohir.D07G179400	D07	40542313	40542522	210	GhZFPH4_DAP-vs-GhZFPH4_neg_peak_6641	4.31556	7.49719	3.52087	3.18E-08	0.000301391	Distal Intergenic	40475881	40477447	1567	2	Gohir.D07G179400.1	-64866	IPR005333,IPR017887,IPR017888	Transcription factor, TCP|Transcription factor TCP subgroup|CYC/TB1, R domain	-	-	GO:0003700	DNA-binding transcription factor activity	-	-
Gohir.A09G040400	A09	25166589	25166759	171	GhZFPH4_DAP-vs-GhZFPH4_neg_peak_3264	4.31545	7.14978	3.20475	7.08E-08	0.000624094	Distal Intergenic	25267674	25271870	4197	1	Gohir.A09G040400.2	-100915	IPR001356,IPR002913,IPR009057,IPR042160	Homeobox domain|START domain|Homeobox-like domain superfamily|Homeobox-leucine zipper protein GLABRA2/ANL2/PDF2/ATML1-like	K09338	homeobox-leucine zipper protein	GO:0003677,GO:0008289	DNA binding|lipid binding	ko01522	Endocrine resistance
Gohir.D12G081902	D12	23121065	23121286	222	GhZFPH4_DAP-vs-GhZFPH4_neg_peak_7652	4.31545	7.14978	3.20475	7.08E-08	0.000624094	Distal Intergenic	23087365	23088567	1203	1	Gohir.D12G081902.1	33700	-	-	K10664	E3 ubiquitin-protein ligase ATL6/9/15/31/42/55 [EC:2.3.2.27]	-	-	ko01522	Endocrine resistance
Gohir.A03G107800	A03	70859779	70860022	244	GhZFPH4_DAP-vs-GhZFPH4_neg_peak_1060	4.31532	6.80307	2.88806	1.57E-07	0.00129402	Distal Intergenic	70851864	70852659	796	2	Gohir.A03G107800.1	-7120	IPR009438	Phytosulfokine	-	-	GO:0005576,GO:0008083,GO:0008283	extracellular region|growth factor activity|cell population proliferation	-	-
Gohir.A04G062800	A04	50867152	50867381	230	GhZFPH4_DAP-vs-GhZFPH4_neg_peak_1456	4.31532	6.80307	2.88806	1.57E-07	0.00129402	Distal Intergenic	50799989	50806742	6754	2	Gohir.A04G062800.1	-60410	-	-	-	-	-	-	-	-
Gohir.A08G091400	A08	40553788	40553922	135	GhZFPH4_DAP-vs-GhZFPH4_neg_peak_2881	4.31532	6.80307	2.88806	1.57E-07	0.00129402	Distal Intergenic	40545063	40546172	1110	2	Gohir.A08G091400.1	-7616	-	-	-	-	-	-	-	-
Gohir.1Z049333	scaffold_136	4478	4605	128	GhZFPH4_DAP-vs-GhZFPH4_neg_peak_8040	4.30791	6.44539	2.56005	3.59E-07	0.00275391	Distal Intergenic	10816	13564	2749	2	Gohir.1Z049333.1	8959	-	-	-	-	-	-	-	-
Gohir.1Z049361	scaffold_190	34988	35133	146	GhZFPH4_DAP-vs-GhZFPH4_neg_peak_8111	4.30791	6.44539	2.56005	3.59E-07	0.00275391	Promoter (<=1kb)	34362	38909	4548	1	Gohir.1Z049361.1	626	IPR010255,IPR019791,IPR037120	Haem peroxidase superfamily|Haem peroxidase, animal-type|Haem peroxidase domain superfamily, animal type	K10529	alpha-dioxygenase [EC:1.14.99.-]	GO:0004601,GO:0006979,GO:0020037,GO:0055114	peroxidase activity|response to oxidative stress|heme binding|oxidation-reduction process	ko00592	alpha-Linolenic acid metabolism
Gohir.1Z049550	scaffold_52	39201	39458	258	GhZFPH4_DAP-vs-GhZFPH4_neg_peak_8511	4.30791	6.44539	2.56005	3.59E-07	0.00275391	Distal Intergenic	49303	51396	2094	2	Gohir.1Z049550.1	11938	IPR035992,IPR040249	Ricin B-like lectins|Ricin B-like lectin EULS3-like	-	-	-	-	-	-
Gohir.A01G019300	A01	1812172	1812338	167	GhZFPH4_DAP-vs-GhZFPH4_neg_peak_3	4.30791	6.44539	2.56005	3.59E-07	0.00275391	Promoter (1-2kb)	1813362	1814713	1352	1	Gohir.A01G019300.1	-1024	IPR000571,IPR036855	Zinc finger, CCCH-type|Zinc finger, CCCH-type superfamily	K23047	E3 ubiquitin-protein ligase UNKL [EC:2.3.2.27]	GO:0046872	metal ion binding	ko01522	Endocrine resistance
Gohir.A01G072700	A01	10288304	10288568	265	GhZFPH4_DAP-vs-GhZFPH4_neg_peak_24	4.30791	6.44539	2.56005	3.59E-07	0.00275391	Distal Intergenic	10298431	10301159	2729	2	Gohir.A01G072700.1	12591	IPR001906,IPR005630,IPR008930,IPR008949,IPR036965	Terpene synthase, N-terminal domain|Terpene synthase, metal-binding domain|Terpenoid cyclases/protein prenyltransferase alpha-alpha toroid|Isoprenoid synthase domain superfamily|Terpene synthase, N-terminal domain superfamily	K15803	(-)-germacrene D synthase [EC:4.2.3.75]	GO:0000287,GO:0010333,GO:0016829	magnesium ion binding|terpene synthase activity|lyase activity	ko00909	Sesquiterpenoid and triterpenoid biosynthesis
Gohir.A01G093500	A01	14451169	14451352	184	GhZFPH4_DAP-vs-GhZFPH4_neg_peak_34	4.30791	6.44539	2.56005	3.59E-07	0.00275391	Distal Intergenic	14457083	14459313	2231	1	Gohir.A01G093500.2	-5731	IPR001841,IPR013083	Zinc finger, RING-type|Zinc finger, RING/FYVE/PHD-type	-	-	-	-	-	-
Gohir.A01G095100	A01	15026397	15026718	322	GhZFPH4_DAP-vs-GhZFPH4_neg_peak_40	4.30791	6.44539	2.56005	3.59E-07	0.00275391	Distal Intergenic	15039365	15041997	2633	2	Gohir.A01G095100.2	15279	IPR001611,IPR032675	Leucine-rich repeat|Leucine-rich repeat domain superfamily	-	-	GO:0005515	protein binding	-	-
Gohir.A01G097700	A01	17064559	17064683	125	GhZFPH4_DAP-vs-GhZFPH4_neg_peak_47	4.30791	6.44539	2.56005	3.59E-07	0.00275391	Distal Intergenic	17053544	17054500	957	2	Gohir.A01G097700.2	-10059	-	-	-	-	-	-	-	-
Gohir.A01G102000	A01	19213198	19213372	175	GhZFPH4_DAP-vs-GhZFPH4_neg_peak_51	4.30791	6.44539	2.56005	3.59E-07	0.00275391	3' UTR	19213100	19216712	3613	2	Gohir.A01G102000.1	3340	IPR002225,IPR028110,IPR036291	3-beta hydroxysteroid dehydrogenase/isomerase|Transmembrane protein 254|NAD(P)-binding domain superfamily	-	-	GO:0003854,GO:0006694,GO:0016616,GO:0055114	3-beta-hydroxy-delta5-steroid dehydrogenase activity|steroid biosynthetic process|oxidoreductase activity, acting on the CH-OH group of donors, NAD or NADP as acceptor|oxidation-reduction process	-	-
Gohir.A01G104700	A01	19864750	19864876	127	GhZFPH4_DAP-vs-GhZFPH4_neg_peak_57	4.30791	6.44539	2.56005	3.59E-07	0.00275391	Promoter (1-2kb)	19865968	19870699	4732	1	Gohir.A01G104700.3	-1092	IPR000719,IPR011009	Protein kinase domain|Protein kinase-like domain superfamily	-	-	GO:0004672,GO:0005524,GO:0006468	protein kinase activity|ATP binding|protein phosphorylation	-	-
Gohir.A01G113300	A01	23397074	23397267	194	GhZFPH4_DAP-vs-GhZFPH4_neg_peak_69	4.30791	6.44539	2.56005	3.59E-07	0.00275391	Distal Intergenic	23440943	23442533	1591	2	Gohir.A01G113300.1	45266	IPR004695,IPR038665	Voltage-dependent anion channel|Voltage-dependent anion channel superfamily	-	-	GO:0016021,GO:0055085	integral component of membrane|transmembrane transport	-	-
Gohir.A01G115000	A01	24712848	24713249	402	GhZFPH4_DAP-vs-GhZFPH4_neg_peak_73	4.30791	6.44539	2.56005	3.59E-07	0.00275391	Distal Intergenic	24685084	24689393	4310	2	Gohir.A01G115000.1	-23455	IPR003613,IPR011989,IPR013083,IPR016024	U box domain|Armadillo-like helical|Zinc finger, RING/FYVE/PHD-type|Armadillo-type fold	-	-	GO:0004842,GO:0016567	ubiquitin-protein transferase activity|protein ubiquitination	-	-
Gohir.A01G122400	A01	28410827	28411068	242	GhZFPH4_DAP-vs-GhZFPH4_neg_peak_86	4.30791	6.44539	2.56005	3.59E-07	0.00275391	Distal Intergenic	28236675	28238102	1428	1	Gohir.A01G122400.2	174152	IPR001471,IPR016177,IPR036955	AP2/ERF domain|DNA-binding domain superfamily|AP2/ERF domain superfamily	K09286	EREBP-like factor	GO:0003677,GO:0003700,GO:0006355	DNA binding|DNA-binding transcription factor activity|regulation of transcription, DNA-templated	ko01522	Endocrine resistance
Gohir.A01G122666	A01	29994633	29994818	186	GhZFPH4_DAP-vs-GhZFPH4_neg_peak_92	4.30791	6.44539	2.56005	3.59E-07	0.00275391	Distal Intergenic	29848996	29850260	1265	1	Gohir.A01G122666.1	145637	IPR011598,IPR036638	Myc-type, basic helix-loop-helix (bHLH) domain|Helix-loop-helix DNA-binding domain superfamily	-	-	GO:0046983	protein dimerization activity	-	-
Gohir.A01G122800	A01	30414084	30414230	147	GhZFPH4_DAP-vs-GhZFPH4_neg_peak_94	4.30791	6.44539	2.56005	3.59E-07	0.00275391	Distal Intergenic	30370163	30378984	8822	2	Gohir.A01G122800.1	-35100	IPR006947,IPR006948,IPR015421,IPR015422,IPR015424,IPR037029	Alliinase, EGF-like domain|Alliinase, C-terminal|Pyridoxal phosphate-dependent transferase, major domain|Pyridoxal phosphate-dependent transferase domain 1|Pyridoxal phosphate-dependent transferase|Alliinase, N-terminal domain superfamily	-	-	GO:0003824,GO:0016846	catalytic activity|carbon-sulfur lyase activity	-	-
Gohir.A01G131900	A01	41008804	41008941	138	GhZFPH4_DAP-vs-GhZFPH4_neg_peak_136	4.30791	6.44539	2.56005	3.59E-07	0.00275391	Distal Intergenic	41044413	41046743	2331	2	Gohir.A01G131900.1	37802	IPR000626,IPR019956,IPR029071	Ubiquitin-like domain|Ubiquitin domain|Ubiquitin-like domain superfamily	-	-	GO:0005515	protein binding	ko01522,ko03320,ko04120,ko04137,ko05131,ko05167	Endocrine resistance|PPAR signaling pathway|Ubiquitin mediated proteolysis|Mitophagy - animal|Shigellosis|Kaposi sarcoma-associated herpesvirus infection
Gohir.A01G136800	A01	50177094	50177390	297	GhZFPH4_DAP-vs-GhZFPH4_neg_peak_157	4.30791	6.44539	2.56005	3.59E-07	0.00275391	Promoter (<=1kb)	50174298	50177841	3544	2	Gohir.A01G136800.1	451	IPR025846,IPR026057,IPR029962,IPR029989	PMR5 N-terminal domain|PC-Esterase|Trichome birefringence-like family|Trichome birefringence/trichome birefringence-like 1	-	-	-	-	-	-
Gohir.A01G137526	A01	52544195	52544597	403	GhZFPH4_DAP-vs-GhZFPH4_neg_peak_174	4.30791	6.44539	2.56005	3.59E-07	0.00275391	Distal Intergenic	52870754	52871512	759	1	Gohir.A01G137526.1	-326157	-	-	-	-	-	-	-	-
Gohir.A01G146028	A01	77742384	77742514	131	GhZFPH4_DAP-vs-GhZFPH4_neg_peak_283	4.30791	6.44539	2.56005	3.59E-07	0.00275391	Distal Intergenic	77418718	77419438	721	2	Gohir.A01G146028.1	-322946	IPR000916,IPR023393	Bet v I/Major latex protein|START-like domain superfamily	-	-	GO:0006952	defense response	-	-
Gohir.A01G147400	A01	86680288	86680555	268	GhZFPH4_DAP-vs-GhZFPH4_neg_peak_320	4.30791	6.44539	2.56005	3.59E-07	0.00275391	Distal Intergenic	86750481	86752133	1653	2	Gohir.A01G147400.1	71578	IPR000086,IPR015797	NUDIX hydrolase domain|NUDIX hydrolase-like domain superfamily	K07766	diphosphoinositol-polyphosphate diphosphatase [EC:3.6.1.52]	GO:0016787	hydrolase activity	ko01522	Endocrine resistance
Gohir.A01G150200	A01	90164206	90164311	106	GhZFPH4_DAP-vs-GhZFPH4_neg_peak_334	4.30791	6.44539	2.56005	3.59E-07	0.00275391	Distal Intergenic	89925728	89927578	1851	2	Gohir.A01G150200.1	-236628	IPR005202,IPR021914,IPR030006,IPR038088	Transcription factor GRAS|Transcriptional factor DELLA, N-terminal|Transcriptional factor DELLA|DELLA, N-terminal domain superfamily	-	-	GO:0003712,GO:0005634	transcription coregulator activity|nucleus	ko04075	Plant hormone signal transduction
Gohir.A01G151436	A01	79166974	79167104	131	GhZFPH4_DAP-vs-GhZFPH4_neg_peak_290	4.30791	6.44539	2.56005	3.59E-07	0.00275391	Distal Intergenic	79294041	79298760	4720	1	Gohir.A01G151436.1	-126937	IPR001902,IPR002645,IPR011547,IPR030313,IPR036513	SLC26A/SulP transporter|STAS domain|SLC26A/SulP transporter domain|Sulfate transporter 3.3|STAS domain superfamily	-	-	GO:0008271,GO:0008272,GO:0015116,GO:0016020,GO:0016021,GO:0055085	secondary active sulfate transmembrane transporter activity|sulfate transport|sulfate transmembrane transporter activity|membrane|integral component of membrane|transmembrane transport	ko01522	Endocrine resistance
Gohir.A01G151490	A01	79604549	79604816	268	GhZFPH4_DAP-vs-GhZFPH4_neg_peak_293	4.30791	6.44539	2.56005	3.59E-07	0.00275391	Distal Intergenic	79318621	79320748	2128	1	Gohir.A01G151490.1	285928	IPR008906,IPR012337	HAT, C-terminal dimerisation domain|Ribonuclease H-like superfamily	-	-	GO:0046983	protein dimerization activity	-	-
Gohir.A01G154000	A01	93506418	93506553	136	GhZFPH4_DAP-vs-GhZFPH4_neg_peak_347	4.30791	6.44539	2.56005	3.59E-07	0.00275391	Distal Intergenic	93464974	93466460	1487	1	Gohir.A01G154000.1	41444	IPR003657,IPR036576	WRKY domain|WRKY domain superfamily	-	-	GO:0003700,GO:0006355,GO:0043565	DNA-binding transcription factor activity|regulation of transcription, DNA-templated|sequence-specific DNA binding	-	-
Gohir.A01G156900	A01	96189336	96189505	170	GhZFPH4_DAP-vs-GhZFPH4_neg_peak_358	4.30791	6.44539	2.56005	3.59E-07	0.00275391	Promoter (1-2kb)	96190310	96190915	606	2	Gohir.A01G156900.1	1410	IPR009388,IPR038760	Photosystem II PsbY|Photosystem II PsbY, plant	K02723	photosystem II PsbY protein	GO:0009523,GO:0015979,GO:0016021,GO:0030145	photosystem II|photosynthesis|integral component of membrane|manganese ion binding	ko00195,ko01522	Photosynthesis|Endocrine resistance
Gohir.A01G160500	A01	102492751	102492898	148	GhZFPH4_DAP-vs-GhZFPH4_neg_peak_379	4.30791	6.44539	2.56005	3.59E-07	0.00275391	Distal Intergenic	102504778	102508325	3548	1	Gohir.A01G160500.2	-11880	IPR000243,IPR001353,IPR023333,IPR029055	Peptidase T1A, proteasome beta-subunit|Proteasome, subunit alpha/beta|Proteasome B-type subunit|Nucleophile aminohydrolases, N-terminal	K02737	20S proteasome subunit beta 5 [EC:3.4.25.1]	GO:0004175,GO:0004298,GO:0005839,GO:0051603	endopeptidase activity|threonine-type endopeptidase activity|proteasome core complex|proteolysis involved in cellular protein catabolic process	ko01522,ko03050	Endocrine resistance|Proteasome
Gohir.A01G160600	A01	102440327	102440595	269	GhZFPH4_DAP-vs-GhZFPH4_neg_peak_378	4.30791	6.44539	2.56005	3.59E-07	0.00275391	Distal Intergenic	102420595	102424158	3564	1	Gohir.A01G160600.1	19732	IPR004263,IPR040911	Exostosin-like|Exostosin, GT47 domain	-	-	GO:0006486,GO:0016757	protein glycosylation|transferase activity, transferring glycosyl groups	-	-
Gohir.A01G166700	A01	106012892	106013135	244	GhZFPH4_DAP-vs-GhZFPH4_neg_peak_397	4.30791	6.44539	2.56005	3.59E-07	0.00275391	Distal Intergenic	106035065	106038078	3014	1	Gohir.A01G166700.1	-21930	IPR007603	Choline transporter-like	-	-	-	-	-	-
Gohir.A01G171300	A01	107983796	107984010	215	GhZFPH4_DAP-vs-GhZFPH4_neg_peak_401	4.30791	6.44539	2.56005	3.59E-07	0.00275391	Distal Intergenic	107966745	107974851	8107	2	Gohir.A01G171300.1	-8945	IPR000719,IPR001245,IPR002912,IPR011009	Protein kinase domain|Serine-threonine/tyrosine-protein kinase, catalytic domain|ACT domain|Protein kinase-like domain superfamily	-	-	GO:0004672,GO:0005524,GO:0006468	protein kinase activity|ATP binding|protein phosphorylation	-	-
Gohir.A01G171800	A01	108156359	108156503	145	GhZFPH4_DAP-vs-GhZFPH4_neg_peak_402	4.30791	6.44539	2.56005	3.59E-07	0.00275391	Distal Intergenic	108144694	108149303	4610	2	Gohir.A01G171800.1	-7056	IPR005512,IPR038937	PRONE domain|Rop guanine nucleotide exchange factor	-	-	GO:0005089	Rho guanyl-nucleotide exchange factor activity	-	-
Gohir.A01G182580	A01	111080182	111080330	149	GhZFPH4_DAP-vs-GhZFPH4_neg_peak_410	4.30791	6.44539	2.56005	3.59E-07	0.00275391	Distal Intergenic	111051647	111052907	1261	1	Gohir.A01G182580.1	28535	-	-	-	-	-	-	-	-
Gohir.A01G184400	A01	111529159	111529432	274	GhZFPH4_DAP-vs-GhZFPH4_neg_peak_411	4.30791	6.44539	2.56005	3.59E-07	0.00275391	Promoter (2-3kb)	111526573	111527354	782	1	Gohir.A01G184400.1	2586	-	-	-	-	-	-	-	-
Gohir.A02G003900	A02	253899	254037	139	GhZFPH4_DAP-vs-GhZFPH4_neg_peak_430	4.30791	6.44539	2.56005	3.59E-07	0.00275391	Promoter (1-2kb)	251735	255744	4010	2	Gohir.A02G003900.1	1707	-	-	-	-	-	-	-	-
Gohir.A02G016901	A02	1965893	1966170	278	GhZFPH4_DAP-vs-GhZFPH4_neg_peak_434	4.30791	6.44539	2.56005	3.59E-07	0.00275391	Distal Intergenic	1969897	1970708	812	1	Gohir.A02G016901.1	-3727	-	-	-	-	-	-	-	-
Gohir.A02G038301	A02	4950148	4950308	161	GhZFPH4_DAP-vs-GhZFPH4_neg_peak_439	4.30791	6.44539	2.56005	3.59E-07	0.00275391	Distal Intergenic	4996710	4997369	660	1	Gohir.A02G038301.1	-46402	-	-	K14516	ethylene-responsive transcription factor 1	-	-	ko01522,ko04016,ko04075	Endocrine resistance|MAPK signaling pathway - plant|Plant hormone signal transduction
Gohir.A02G038301	A02	5006554	5006670	117	GhZFPH4_DAP-vs-GhZFPH4_neg_peak_440	4.30791	6.44539	2.56005	3.59E-07	0.00275391	Distal Intergenic	4996710	4997369	660	1	Gohir.A02G038301.1	9844	-	-	K14516	ethylene-responsive transcription factor 1	-	-	ko01522,ko04016,ko04075	Endocrine resistance|MAPK signaling pathway - plant|Plant hormone signal transduction
Gohir.A02G049000	A02	7209835	7210085	251	GhZFPH4_DAP-vs-GhZFPH4_neg_peak_443	4.30791	6.44539	2.56005	3.59E-07	0.00275391	Distal Intergenic	7246852	7247801	950	1	Gohir.A02G049000.1	-36767	-	-	-	-	-	-	-	-
Gohir.A02G078800	A02	18727579	18727810	232	GhZFPH4_DAP-vs-GhZFPH4_neg_peak_477	4.30791	6.44539	2.56005	3.59E-07	0.00275391	Distal Intergenic	18704458	18712494	8037	2	Gohir.A02G078800.1	-15085	-	-	-	-	-	-	-	-
Gohir.A02G080900	A02	20794646	20794787	142	GhZFPH4_DAP-vs-GhZFPH4_neg_peak_490	4.30791	6.44539	2.56005	3.59E-07	0.00275391	Distal Intergenic	20788017	20789166	1150	1	Gohir.A02G080900.1	6629	-	-	-	-	-	-	-	-
Gohir.A02G082500	A02	22598244	22598647	404	GhZFPH4_DAP-vs-GhZFPH4_neg_peak_496	4.30791	6.44539	2.56005	3.59E-07	0.00275391	Distal Intergenic	22391018	22392290	1273	1	Gohir.A02G082500.1	207226	-	-	-	-	-	-	-	-
Gohir.A02G084000	A02	31859924	31860054	131	GhZFPH4_DAP-vs-GhZFPH4_neg_peak_547	4.30791	6.44539	2.56005	3.59E-07	0.00275391	Distal Intergenic	31981812	31986796	4985	2	Gohir.A02G084000.1	126742	-	-	-	-	-	-	-	-
Gohir.A02G087200	A02	35343694	35344025	332	GhZFPH4_DAP-vs-GhZFPH4_neg_peak_564	4.30791	6.44539	2.56005	3.59E-07	0.00275391	Distal Intergenic	35273818	35278241	4424	2	Gohir.A02G087200.3	-65453	-	-	-	-	-	-	ko01522	Endocrine resistance
Gohir.A02G090100	A02	24505029	24505167	139	GhZFPH4_DAP-vs-GhZFPH4_neg_peak_508	4.30791	6.44539	2.56005	3.59E-07	0.00275391	Distal Intergenic	24315326	24317132	1807	2	Gohir.A02G090100.1	-187897	-	-	K22395	cinnamyl-alcohol dehydrogenase [EC:1.1.1.195]	-	-	ko00940	Phenylpropanoid biosynthesis
Gohir.A02G093800	A02	27763616	27763847	232	GhZFPH4_DAP-vs-GhZFPH4_neg_peak_520	4.30791	6.44539	2.56005	3.59E-07	0.00275391	Distal Intergenic	27848119	27852182	4064	1	Gohir.A02G093800.1	-84272	-	-	-	-	-	-	-	-
Gohir.A02G112001	A02	56562815	56563139	325	GhZFPH4_DAP-vs-GhZFPH4_neg_peak_637	4.30791	6.44539	2.56005	3.59E-07	0.00275391	Distal Intergenic	56444739	56446658	1920	2	Gohir.A02G112001.1	-116157	-	-	-	-	-	-	-	-
Gohir.A02G118300	A02	84293967	84294137	171	GhZFPH4_DAP-vs-GhZFPH4_neg_peak_721	4.30791	6.44539	2.56005	3.59E-07	0.00275391	Distal Intergenic	84248615	84249611	997	1	Gohir.A02G118300.1	45352	-	-	-	-	-	-	-	-
Gohir.A02G118301	A02	84377144	84377260	117	GhZFPH4_DAP-vs-GhZFPH4_neg_peak_722	4.30791	6.44539	2.56005	3.59E-07	0.00275391	Distal Intergenic	84401030	84401329	300	1	Gohir.A02G118301.1	-23770	-	-	-	-	-	-	-	-
Gohir.A02G131001	A02	98603655	98603769	115	GhZFPH4_DAP-vs-GhZFPH4_neg_peak_780	4.30791	6.44539	2.56005	3.59E-07	0.00275391	Distal Intergenic	98597684	98600303	2620	2	Gohir.A02G131001.1	-3352	-	-	-	-	-	-	-	-
Gohir.A02G133300	A02	99305345	99305501	157	GhZFPH4_DAP-vs-GhZFPH4_neg_peak_784	4.30791	6.44539	2.56005	3.59E-07	0.00275391	Distal Intergenic	99319302	99320183	882	1	Gohir.A02G133300.1	-13801	-	-	K16282	E3 ubiquitin-protein ligase RHA2 [EC:2.3.2.27]	-	-	ko01522	Endocrine resistance
Gohir.A02G142001	A02	102974560	102974942	383	GhZFPH4_DAP-vs-GhZFPH4_neg_peak_811	4.30791	6.44539	2.56005	3.59E-07	0.00275391	Promoter (<=1kb)	102973910	102975019	1110	1	Gohir.A02G142001.1	650	-	-	-	-	-	-	-	-
Gohir.A02G142900	A02	103329127	103329293	167	GhZFPH4_DAP-vs-GhZFPH4_neg_peak_812	4.30791	6.44539	2.56005	3.59E-07	0.00275391	Distal Intergenic	103343647	103348413	4767	1	Gohir.A02G142900.1	-14354	-	-	K11842	ubiquitin carboxyl-terminal hydrolase 12/46 [EC:3.4.19.12]	-	-	ko01522	Endocrine resistance
Gohir.A03G001500	A03	761699	761879	181	GhZFPH4_DAP-vs-GhZFPH4_neg_peak_827	4.30791	6.44539	2.56005	3.59E-07	0.00275391	Distal Intergenic	785891	787146	1256	1	Gohir.A03G001500.1	-24012	IPR005175,IPR014476	PPC domain|AT-hook motif nuclear-localized protein 15-29	-	-	GO:0003680	AT DNA binding	-	-
Gohir.A03G010100	A03	2070284	2070486	203	GhZFPH4_DAP-vs-GhZFPH4_neg_peak_830	4.30791	6.44539	2.56005	3.59E-07	0.00275391	Distal Intergenic	2059966	2063680	3715	2	Gohir.A03G010100.1	-6604	IPR003441,IPR036093	NAC domain|NAC domain superfamily	-	-	GO:0003677,GO:0006355	DNA binding|regulation of transcription, DNA-templated	-	-
Gohir.A03G028500	A03	5386454	5386588	135	GhZFPH4_DAP-vs-GhZFPH4_neg_peak_845	4.30791	6.44539	2.56005	3.59E-07	0.00275391	Distal Intergenic	5371471	5381581	10111	2	Gohir.A03G028500.1	-4873	IPR002044,IPR003094,IPR013078,IPR013079,IPR013783,IPR013784,IPR027417,IPR029033	Carbohydrate binding module family 20|Fructose-2,6-bisphosphatase|Histidine phosphatase superfamily, clade-1|6-phosphofructo-2-kinase|Immunoglobulin-like fold|Carbohydrate-binding-like fold|P-loop containing nucleoside triphosphate hydrolase|Histidine phosphatase superfamily	K01103	6-phosphofructo-2-kinase / fructose-2,6-biphosphatase 3 [EC:2.7.1.105 3.1.3.46]	GO:0003824,GO:0003873,GO:0005524,GO:0006000,GO:0006003,GO:0030246,GO:2001070	catalytic activity|6-phosphofructo-2-kinase activity|ATP binding|fructose metabolic process|fructose 2,6-bisphosphate metabolic process|carbohydrate binding|starch binding	ko00051,ko04066,ko04152	Fructose and mannose metabolism|HIF-1 signaling pathway|AMPK signaling pathway
Gohir.A03G034700	A03	6648815	6648996	182	GhZFPH4_DAP-vs-GhZFPH4_neg_peak_850	4.30791	6.44539	2.56005	3.59E-07	0.00275391	Promoter (1-2kb)	6647356	6650745	3390	1	Gohir.A03G034700.1	1459	IPR001611,IPR013210,IPR032675	Leucine-rich repeat|Leucine-rich repeat-containing N-terminal, plant-type|Leucine-rich repeat domain superfamily	-	-	GO:0005515	protein binding	-	-
Gohir.A03G049700	A03	10722815	10722980	166	GhZFPH4_DAP-vs-GhZFPH4_neg_peak_859	4.30791	6.44539	2.56005	3.59E-07	0.00275391	Distal Intergenic	10705579	10706669	1091	2	Gohir.A03G049700.1	-16146	IPR021584,IPR037244	Thylakoid soluble phosphoprotein TSP9|Thylakoid soluble phosphoprotein TSP9 superfamily	-	-	-	-	-	-
Gohir.A03G071250	A03	20219979	20220183	205	GhZFPH4_DAP-vs-GhZFPH4_neg_peak_887	4.30791	6.44539	2.56005	3.59E-07	0.00275391	Distal Intergenic	20252020	20254365	2346	1	Gohir.A03G071250.1	-31837	IPR002067,IPR002113,IPR018108,IPR023395	Mitochondrial carrier protein|Adenine nucleotide translocator 1|Mitochondrial substrate/solute carrier|Mitochondrial carrier domain superfamily	K05863	solute carrier family 25 (mitochondrial adenine nucleotide translocator), member 4/5/6/31	GO:0005347,GO:0005743,GO:0022857,GO:0055085	ATP transmembrane transporter activity|mitochondrial inner membrane|transmembrane transporter activity|transmembrane transport	ko01522,ko04020,ko04022,ko04217,ko04218,ko05164	Endocrine resistance|Calcium signaling pathway|cGMP-PKG signaling pathway|Necroptosis|Cellular senescence|Influenza A
Gohir.A03G075800	A03	23961163	23961321	159	GhZFPH4_DAP-vs-GhZFPH4_neg_peak_906	4.30791	6.44539	2.56005	3.59E-07	0.00275391	Distal Intergenic	24029893	24034007	4115	1	Gohir.A03G075800.1	-68572	IPR001079,IPR002659,IPR013320	Galectin, carbohydrate recognition domain|Glycosyl transferase, family 31|Concanavalin A-like lectin/glucanase domain superfamily	K20843	hydroxyproline O-galactosyltransferase 2/3/4/5/6 [EC:2.4.1.-]	GO:0006486,GO:0016020,GO:0030246	protein glycosylation|membrane|carbohydrate binding	ko01522	Endocrine resistance
Gohir.A03G076300	A03	31336400	31336577	178	GhZFPH4_DAP-vs-GhZFPH4_neg_peak_940	4.30791	6.44539	2.56005	3.59E-07	0.00275391	Distal Intergenic	31421283	31423025	1743	2	Gohir.A03G076300.1	86448	-	-	-	-	-	-	-	-
Gohir.A03G078800	A03	25971279	25971610	332	GhZFPH4_DAP-vs-GhZFPH4_neg_peak_914	4.30791	6.44539	2.56005	3.59E-07	0.00275391	Distal Intergenic	26022651	26025802	3152	1	Gohir.A03G078800.1	-51041	IPR003697,IPR029001	Nucleoside triphosphate pyrophosphatase Maf-like protein|Inosine triphosphate pyrophosphatase-like	-	-	GO:0047429	nucleoside-triphosphate diphosphatase activity	ko01522	Endocrine resistance
Gohir.A03G079700	A03	27184702	27184984	283	GhZFPH4_DAP-vs-GhZFPH4_neg_peak_919	4.30791	6.44539	2.56005	3.59E-07	0.00275391	Distal Intergenic	27165779	27170230	4452	2	Gohir.A03G079700.4	-14472	IPR001943,IPR003729,IPR036104	UVR domain|Bifunctional nuclease domain|Bifunctional nuclease superfamily	-	-	GO:0004518,GO:0005515	nuclease activity|protein binding	-	-
Gohir.A03G079900	A03	29709981	29710123	143	GhZFPH4_DAP-vs-GhZFPH4_neg_peak_932	4.30791	6.44539	2.56005	3.59E-07	0.00275391	Distal Intergenic	29623498	29628954	5457	1	Gohir.A03G079900.3	86483	IPR005123	Oxoglutarate/iron-dependent dioxygenase	-	-	GO:0016491,GO:0055114	oxidoreductase activity|oxidation-reduction process	-	-
Gohir.A03G093900	A03	49456125	49456383	259	GhZFPH4_DAP-vs-GhZFPH4_neg_peak_1014	4.30791	6.44539	2.56005	3.59E-07	0.00275391	Distal Intergenic	49431192	49438864	7673	1	Gohir.A03G093900.2	24933	IPR001680,IPR006594,IPR015943,IPR017986,IPR020472,IPR036322	WD40 repeat|LIS1 homology motif|WD40/YVTN repeat-like-containing domain superfamily|WD40-repeat-containing domain|G-protein beta WD-40 repeat|WD40-repeat-containing domain superfamily	-	-	GO:0005515	protein binding	-	-
Gohir.A03G094800	A03	50447262	50447412	151	GhZFPH4_DAP-vs-GhZFPH4_neg_peak_1017	4.30791	6.44539	2.56005	3.59E-07	0.00275391	Distal Intergenic	50341527	50348609	7083	1	Gohir.A03G094800.1	105735	IPR009060,IPR015940,IPR018997,IPR036339	UBA-like superfamily|Ubiquitin-associated domain|PUB domain|PUB-like domain superfamily	-	-	GO:0005515	protein binding	-	-
Gohir.A03G096700	A03	54946460	54946623	164	GhZFPH4_DAP-vs-GhZFPH4_neg_peak_1027	4.30791	6.44539	2.56005	3.59E-07	0.00275391	Distal Intergenic	55472403	55477809	5407	1	Gohir.A03G096700.1	-525780	IPR000719,IPR001245,IPR011009	Protein kinase domain|Serine-threonine/tyrosine-protein kinase, catalytic domain|Protein kinase-like domain superfamily	-	-	GO:0004672,GO:0005524,GO:0006468	protein kinase activity|ATP binding|protein phosphorylation	-	-
Gohir.A03G100200	A03	62928895	62929133	239	GhZFPH4_DAP-vs-GhZFPH4_neg_peak_1045	4.30791	6.44539	2.56005	3.59E-07	0.00275391	Distal Intergenic	62714792	62716284	1493	2	Gohir.A03G100200.1	-212611	IPR006694	Fatty acid hydroxylase	K04713	sphinganine C4-monooxygenase [EC:1.14.18.5]	GO:0005506,GO:0008610,GO:0016491,GO:0055114	iron ion binding|lipid biosynthetic process|oxidoreductase activity|oxidation-reduction process	ko00600	Sphingolipid metabolism
Gohir.A03G101700	A03	66421379	66421585	207	GhZFPH4_DAP-vs-GhZFPH4_neg_peak_1053	4.30791	6.44539	2.56005	3.59E-07	0.00275391	Distal Intergenic	66487504	66490043	2540	2	Gohir.A03G101700.1	68458	IPR001005,IPR009057,IPR015495,IPR017930	SANT/Myb domain|Homeobox-like domain superfamily|Myb-like transcription factor|Myb domain	K09422	transcription factor MYB, plant	GO:0003677	DNA binding	ko01522	Endocrine resistance
Gohir.A03G106000	A03	69829915	69830184	270	GhZFPH4_DAP-vs-GhZFPH4_neg_peak_1058	4.30791	6.44539	2.56005	3.59E-07	0.00275391	Distal Intergenic	69709018	69710973	1956	1	Gohir.A03G106000.1	120897	IPR002885,IPR011990	Pentatricopeptide repeat|Tetratricopeptide-like helical domain superfamily	-	-	GO:0005515	protein binding	-	-
Gohir.A03G116700	A03	81341027	81341153	127	GhZFPH4_DAP-vs-GhZFPH4_neg_peak_1106	4.30791	6.44539	2.56005	3.59E-07	0.00275391	Distal Intergenic	81178195	81179999	1805	2	Gohir.A03G116700.1	-161028	IPR008540,IPR033264	BES1/BZR1 plant transcription factor, N-terminal|BZR family	-	-	GO:0003700,GO:0006351,GO:0009742	DNA-binding transcription factor activity|transcription, DNA-templated|brassinosteroid mediated signaling pathway	ko04075	Plant hormone signal transduction
Gohir.A03G119300	A03	87705838	87706014	177	GhZFPH4_DAP-vs-GhZFPH4_neg_peak_1120	4.30791	6.44539	2.56005	3.59E-07	0.00275391	Distal Intergenic	87822013	87822915	903	1	Gohir.A03G119300.1	-115999	IPR006501,IPR035513	Pectinesterase inhibitor domain|Invertase/pectin methylesterase inhibitor domain superfamily	-	-	GO:0004857	enzyme inhibitor activity	-	-
Gohir.A03G121600	A03	89840280	89840486	207	GhZFPH4_DAP-vs-GhZFPH4_neg_peak_1128	4.30791	6.44539	2.56005	3.59E-07	0.00275391	Distal Intergenic	89868481	89869814	1334	1	Gohir.A03G121600.1	-27995	IPR000425,IPR023271,IPR034294	Major intrinsic protein|Aquaporin-like|Aquaporin transporter	-	-	GO:0015267,GO:0016020,GO:0055085	channel activity|membrane|transmembrane transport	ko01522	Endocrine resistance
Gohir.A03G135500	A03	97155914	97156239	326	GhZFPH4_DAP-vs-GhZFPH4_neg_peak_1172	4.30791	6.44539	2.56005	3.59E-07	0.00275391	Distal Intergenic	97140890	97142827	1938	1	Gohir.A03G135500.1	15024	IPR021131,IPR030878,IPR036227	Ribosomal protein L18e/L15P|Ribosomal protein L15|Ribosomal L18e/L15P superfamily	K02900	large subunit ribosomal protein L27Ae	GO:0003735,GO:0006412,GO:0015934	structural constituent of ribosome|translation|large ribosomal subunit	ko01522,ko03010	Endocrine resistance|Ribosome
Gohir.A03G155800	A03	105553987	105554216	230	GhZFPH4_DAP-vs-GhZFPH4_neg_peak_1195	4.30791	6.44539	2.56005	3.59E-07	0.00275391	Distal Intergenic	105528796	105532850	4055	2	Gohir.A03G155800.3	-21137	IPR007308,IPR038534,IPR039693	Rtr1/RPAP2 domain|Rtr1/RPAP2 domain superfamily|Rtr1/RPAP2	K20827	RNA polymerase II-associated protein 2 [EC:3.1.3.16]	GO:0008420,GO:0043175,GO:0070940	RNA polymerase II CTD heptapeptide repeat phosphatase activity|RNA polymerase core enzyme binding|dephosphorylation of RNA polymerase II C-terminal domain	ko01522	Endocrine resistance
Gohir.A03G217700	A03	113612613	113612890	278	GhZFPH4_DAP-vs-GhZFPH4_neg_peak_1215	4.30791	6.44539	2.56005	3.59E-07	0.00275391	Promoter (<=1kb)	113612464	113614061	1598	1	Gohir.A03G217700.1	149	IPR004158	Protein of unknown function DUF247, plant	-	-	-	-	-	-
Gohir.A04G015500	A04	2133696	2133931	236	GhZFPH4_DAP-vs-GhZFPH4_neg_peak_1225	4.30791	6.44539	2.56005	3.59E-07	0.00275391	Distal Intergenic	2125002	2126356	1355	2	Gohir.A04G015500.1	-7340	IPR000743,IPR011050,IPR012334	Glycoside hydrolase, family 28|Pectin lyase fold/virulence factor|Pectin lyase fold	-	-	GO:0004650,GO:0005975	polygalacturonase activity|carbohydrate metabolic process	-	-
Gohir.A04G028404	A04	6014826	6014937	112	GhZFPH4_DAP-vs-GhZFPH4_neg_peak_1238	4.30791	6.44539	2.56005	3.59E-07	0.00275391	Distal Intergenic	6035714	6037385	1672	1	Gohir.A04G028404.1	-20777	IPR000644	CBS domain	-	-	-	-	-	-
Gohir.A04G033000	A04	7177235	7177444	210	GhZFPH4_DAP-vs-GhZFPH4_neg_peak_1244	4.30791	6.44539	2.56005	3.59E-07	0.00275391	Promoter (2-3kb)	7174599	7177187	2589	1	Gohir.A04G033000.2	2636	IPR001611,IPR002182,IPR027417,IPR032675	Leucine-rich repeat|NB-ARC|P-loop containing nucleoside triphosphate hydrolase|Leucine-rich repeat domain superfamily	-	-	GO:0005515,GO:0043531	protein binding|ADP binding	-	-
Gohir.A04G040400	A04	9599074	9599326	253	GhZFPH4_DAP-vs-GhZFPH4_neg_peak_1297	4.30791	6.44539	2.56005	3.59E-07	0.00275391	Distal Intergenic	9608322	9611312	2991	2	Gohir.A04G040400.3	11986	-	-	-	-	-	-	-	-
Gohir.A04G046000	A04	12799323	12799562	240	GhZFPH4_DAP-vs-GhZFPH4_neg_peak_1308	4.30791	6.44539	2.56005	3.59E-07	0.00275391	Distal Intergenic	12807956	12808896	941	2	Gohir.A04G046000.1	9334	-	-	-	-	-	-	-	-
Gohir.A04G048400	A04	43000714	43000975	262	GhZFPH4_DAP-vs-GhZFPH4_neg_peak_1425	4.30791	6.44539	2.56005	3.59E-07	0.00275391	Distal Intergenic	43302813	43306504	3692	2	Gohir.A04G048400.1	305529	IPR001683,IPR015404,IPR027267,IPR036871,IPR039358	Phox homologous domain|Sorting nexin Vps5-like, C-terminal|AH/BAR domain superfamily|PX domain superfamily|Sorting nexin-like	K17917	sorting nexin-1/2	GO:0035091	phosphatidylinositol binding	ko01522,ko04144	Endocrine resistance|Endocytosis
Gohir.A04G048400	A04	43159311	43159492	182	GhZFPH4_DAP-vs-GhZFPH4_neg_peak_1426	4.30791	6.44539	2.56005	3.59E-07	0.00275391	Distal Intergenic	43302813	43306504	3692	2	Gohir.A04G048400.1	147012	IPR001683,IPR015404,IPR027267,IPR036871,IPR039358	Phox homologous domain|Sorting nexin Vps5-like, C-terminal|AH/BAR domain superfamily|PX domain superfamily|Sorting nexin-like	K17917	sorting nexin-1/2	GO:0035091	phosphatidylinositol binding	ko01522,ko04144	Endocrine resistance|Endocytosis
Gohir.A04G049100	A04	14586632	14586826	195	GhZFPH4_DAP-vs-GhZFPH4_neg_peak_1317	4.30791	6.44539	2.56005	3.59E-07	0.00275391	Distal Intergenic	14599016	14606639	7624	1	Gohir.A04G049100.1	-12190	IPR004561,IPR005801,IPR015890	Isochorismate synthase|ADC synthase|Chorismate-utilising enzyme, C-terminal	K02552	menaquinone-specific isochorismate synthase [EC:5.4.4.2]	GO:0008909,GO:0009058	isochorismate synthase activity|biosynthetic process	ko00130,ko01053	Ubiquinone and other terpenoid-quinone biosynthesis|Biosynthesis of siderophore group nonribosomal peptides
Gohir.A04G051600	A04	26549554	26549669	116	GhZFPH4_DAP-vs-GhZFPH4_neg_peak_1354	4.30791	6.44539	2.56005	3.59E-07	0.00275391	Distal Intergenic	26450352	26454874	4523	1	Gohir.A04G051600.2	99202	IPR000504,IPR012677,IPR035979	RNA recognition motif domain|Nucleotide-binding alpha-beta plait domain superfamily|RNA-binding domain superfamily	K12741	heterogeneous nuclear ribonucleoprotein A1/A3	GO:0003676	nucleic acid binding	ko01522,ko03040	Endocrine resistance|Spliceosome
Gohir.A04G053500	A04	21548713	21548849	137	GhZFPH4_DAP-vs-GhZFPH4_neg_peak_1337	4.30791	6.44539	2.56005	3.59E-07	0.00275391	Distal Intergenic	21506057	21510808	4752	2	Gohir.A04G053500.2	-37905	IPR001611,IPR032675	Leucine-rich repeat|Leucine-rich repeat domain superfamily	K10268	F-box and leucine-rich repeat protein 2/20	GO:0005515	protein binding	ko01522	Endocrine resistance
Gohir.A04G057626	A04	35204208	35204453	246	GhZFPH4_DAP-vs-GhZFPH4_neg_peak_1381	4.30791	6.44539	2.56005	3.59E-07	0.00275391	Distal Intergenic	35830418	35830735	318	2	Gohir.A04G057626.1	626282	-	-	-	-	-	-	-	-
Gohir.A04G061400	A04	52277766	52278297	532	GhZFPH4_DAP-vs-GhZFPH4_neg_peak_1463	4.30791	6.44539	2.56005	3.59E-07	0.00275391	Distal Intergenic	52260189	52262090	1902	2	Gohir.A04G061400.1	-15676	IPR006458,IPR038933	Ovate protein family, C-terminal|Ovate protein family	-	-	GO:0045892	negative regulation of transcription, DNA-templated	-	-
Gohir.A04G061700	A04	51931845	51931982	138	GhZFPH4_DAP-vs-GhZFPH4_neg_peak_1460	4.30791	6.44539	2.56005	3.59E-07	0.00275391	Distal Intergenic	51902052	51902429	378	1	Gohir.A04G061700.1	29793	IPR003676	Small auxin-up RNA	-	-	GO:0009733	response to auxin	ko04075	Plant hormone signal transduction
Gohir.A04G066114	A04	58806895	58807095	201	GhZFPH4_DAP-vs-GhZFPH4_neg_peak_1487	4.30791	6.44539	2.56005	3.59E-07	0.00275391	Distal Intergenic	58859286	58859715	430	2	Gohir.A04G066114.1	52620	IPR009438	Phytosulfokine	-	-	GO:0005576,GO:0008083,GO:0008283	extracellular region|growth factor activity|cell population proliferation	-	-
Gohir.A04G066414	A04	59974264	59974377	114	GhZFPH4_DAP-vs-GhZFPH4_neg_peak_1491	4.30791	6.44539	2.56005	3.59E-07	0.00275391	Distal Intergenic	60181775	60182569	795	2	Gohir.A04G066414.1	208192	-	-	-	-	-	-	-	-
Gohir.A04G068900	A04	54079814	54079981	168	GhZFPH4_DAP-vs-GhZFPH4_neg_peak_1467	4.30791	6.44539	2.56005	3.59E-07	0.00275391	Distal Intergenic	54453506	54455300	1795	2	Gohir.A04G068900.1	375319	IPR001971,IPR036967	Ribosomal protein S11|Ribosomal protein S11 superfamily	K02955	small subunit ribosomal protein S14e	GO:0003735,GO:0005840,GO:0006412	structural constituent of ribosome|ribosome|translation	ko01522,ko03010	Endocrine resistance|Ribosome
Gohir.A04G073500	A04	67189457	67189656	200	GhZFPH4_DAP-vs-GhZFPH4_neg_peak_1512	4.30791	6.44539	2.56005	3.59E-07	0.00275391	Distal Intergenic	67222232	67230155	7924	2	Gohir.A04G073500.2	40499	IPR001046,IPR017187	NRAMP family|Ethylene-insensitive protein 2	-	-	GO:0009873,GO:0016020,GO:0030001,GO:0046873	ethylene-activated signaling pathway|membrane|metal ion transport|metal ion transmembrane transporter activity	-	-
Gohir.A04G091850	A04	77397726	77397879	154	GhZFPH4_DAP-vs-GhZFPH4_neg_peak_1542	4.30791	6.44539	2.56005	3.59E-07	0.00275391	Distal Intergenic	77427085	77428965	1881	2	Gohir.A04G091850.1	31086	-	-	-	-	-	-	-	-
Gohir.A04G095070	A04	78537020	78537180	161	GhZFPH4_DAP-vs-GhZFPH4_neg_peak_1545	4.30791	6.44539	2.56005	3.59E-07	0.00275391	Promoter (2-3kb)	78532574	78534835	2262	2	Gohir.A04G095070.1	-2185	IPR001519,IPR008331,IPR009040,IPR009078,IPR012347	Ferritin|Ferritin/DPS protein domain|Ferritin-like diiron domain|Ferritin-like superfamily|Ferritin-like	K00522	ferritin heavy chain [EC:1.16.3.2]	GO:0006826,GO:0006879,GO:0008199	iron ion transport|cellular iron ion homeostasis|ferric iron binding	ko01522,ko04216,ko04217,ko04978	Endocrine resistance|Ferroptosis|Necroptosis|Mineral absorption
Gohir.A04G115500	A04	84797300	84797415	116	GhZFPH4_DAP-vs-GhZFPH4_neg_peak_1563	4.30791	6.44539	2.56005	3.59E-07	0.00275391	Distal Intergenic	84811239	84818466	7228	1	Gohir.A04G115500.2	-13824	IPR000719,IPR001220,IPR011009,IPR013320	Protein kinase domain|Legume lectin domain|Protein kinase-like domain superfamily|Concanavalin A-like lectin/glucanase domain superfamily	-	-	GO:0004672,GO:0005524,GO:0006468,GO:0030246	protein kinase activity|ATP binding|protein phosphorylation|carbohydrate binding	-	-
Gohir.A04G141200	A04	88620445	88620604	160	GhZFPH4_DAP-vs-GhZFPH4_neg_peak_1572	4.30791	6.44539	2.56005	3.59E-07	0.00275391	Intron (Gohir.A04G141200.1/Gohir.A04G141200, intron 11 of 13)	88619080	88625396	6317	2	Gohir.A04G141200.1	4792	IPR012458	Domain of unknown function DUF1664	-	-	-	-	-	-
Gohir.A04G147700	A04	89100477	89100731	255	GhZFPH4_DAP-vs-GhZFPH4_neg_peak_1575	4.30791	6.44539	2.56005	3.59E-07	0.00275391	Exon (Gohir.A04G147700.2/Gohir.A04G147700, exon 12 of 33)	89094703	89108868	14166	1	Gohir.A04G147700.3	5774	IPR003440,IPR026899	Glycosyl transferase, family 48|1,3-beta-glucan synthase subunit FKS1-like, domain-1	K00706,K11000	1,3-beta-glucan synthase [EC:2.4.1.34]|callose synthase [EC:2.4.1.-]	GO:0000148,GO:0003843,GO:0006075,GO:0016020	1,3-beta-D-glucan synthase complex|1,3-beta-D-glucan synthase activity|(1->3)-beta-D-glucan biosynthetic process|membrane	ko01522,ko00500,ko04011	Endocrine resistance|Starch and sucrose metabolism|MAPK signaling pathway - yeast
Gohir.A05G004216	A05	611832	611964	133	GhZFPH4_DAP-vs-GhZFPH4_neg_peak_1579	4.30791	6.44539	2.56005	3.59E-07	0.00275391	Promoter (1-2kb)	612987	614100	1114	1	Gohir.A05G004216.1	-1023	IPR000719,IPR011009	Protein kinase domain|Protein kinase-like domain superfamily	-	-	GO:0004672,GO:0005524,GO:0006468	protein kinase activity|ATP binding|protein phosphorylation	-	-
Gohir.A05G005900	A05	810860	811001	142	GhZFPH4_DAP-vs-GhZFPH4_neg_peak_1581	4.30791	6.44539	2.56005	3.59E-07	0.00275391	Promoter (1-2kb)	809590	811302	1713	1	Gohir.A05G005900.1	1270	IPR001005,IPR009057,IPR015495,IPR017930	SANT/Myb domain|Homeobox-like domain superfamily|Myb-like transcription factor|Myb domain	K09422	transcription factor MYB, plant	GO:0003677	DNA binding	ko01522	Endocrine resistance
Gohir.A05G067200	A05	6479658	6479822	165	GhZFPH4_DAP-vs-GhZFPH4_neg_peak_1592	4.30791	6.44539	2.56005	3.59E-07	0.00275391	Intron (Gohir.A05G067300.1/Gohir.A05G067300, intron 3 of 8)	6473432	6475051	1620	1	Gohir.A05G067200.2	6226	IPR002885,IPR011990	Pentatricopeptide repeat|Tetratricopeptide-like helical domain superfamily	-	-	GO:0005515	protein binding	-	-
Gohir.A05G142000	A05	13824008	13824319	312	GhZFPH4_DAP-vs-GhZFPH4_neg_peak_1624	4.30791	6.44539	2.56005	3.59E-07	0.00275391	Promoter (1-2kb)	13824666	13825604	939	2	Gohir.A05G142000.1	1285	IPR001841,IPR013083	Zinc finger, RING-type|Zinc finger, RING/FYVE/PHD-type	-	-	-	-	-	-
Gohir.A05G169800	A05	16969599	16969833	235	GhZFPH4_DAP-vs-GhZFPH4_neg_peak_1632	4.30791	6.44539	2.56005	3.59E-07	0.00275391	Promoter (<=1kb)	16961575	16969798	8224	2	Gohir.A05G169800.2	0	IPR002528	Multi antimicrobial extrusion protein	-	-	GO:0015297,GO:0016020,GO:0042910,GO:0055085	antiporter activity|membrane|xenobiotic transmembrane transporter activity|transmembrane transport	ko01522	Endocrine resistance
Gohir.A05G188000	A05	18583271	18583486	216	GhZFPH4_DAP-vs-GhZFPH4_neg_peak_1640	4.30791	6.44539	2.56005	3.59E-07	0.00275391	Promoter (<=1kb)	18577849	18583543	5695	2	Gohir.A05G188000.1	57	IPR000048,IPR025064	IQ motif, EF-hand binding site|Domain of unknown function DUF4005	-	-	GO:0005515	protein binding	-	-
Gohir.A05G208200	A05	20995396	20995543	148	GhZFPH4_DAP-vs-GhZFPH4_neg_peak_1648	4.30791	6.44539	2.56005	3.59E-07	0.00275391	Promoter (<=1kb)	20994799	20996991	2193	1	Gohir.A05G208200.1	597	IPR007248	Mpv17/PMP22	-	-	GO:0016021	integral component of membrane	ko04146	Peroxisome
Gohir.A05G258000	A05	28623634	28623828	195	GhZFPH4_DAP-vs-GhZFPH4_neg_peak_1665	4.30791	6.44539	2.56005	3.59E-07	0.00275391	Distal Intergenic	28633336	28635694	2359	1	Gohir.A05G258000.1	-9508	IPR003196,IPR011039,IPR036388,IPR036390,IPR040450,IPR040504	Transcription initiation factor IIF, beta subunit|Transcription Factor IIF, Rap30/Rap74, interaction|Winged helix-like DNA-binding domain superfamily|Winged helix DNA-binding domain superfamily|TFIIF beta subunit, HTH domain|TFIIF, beta subunit, N-terminal	K03139	transcription initiation factor TFIIF subunit beta [EC:3.6.4.12]	GO:0005674,GO:0006366,GO:0006367	transcription factor TFIIF complex|transcription by RNA polymerase II|transcription initiation from RNA polymerase II promoter	ko01522,ko03022	Endocrine resistance|Basal transcription factors
Gohir.A05G262900	A05	29572406	29572647	242	GhZFPH4_DAP-vs-GhZFPH4_neg_peak_1667	4.30791	6.44539	2.56005	3.59E-07	0.00275391	Promoter (1-2kb)	29572223	29574140	1918	2	Gohir.A05G262900.1	1493	IPR001128,IPR002401,IPR036396	Cytochrome P450|Cytochrome P450, E-class, group I|Cytochrome P450 superfamily	-	-	GO:0005506,GO:0016705,GO:0020037,GO:0055114	iron ion binding|oxidoreductase activity, acting on paired donors, with incorporation or reduction of molecular oxygen|heme binding|oxidation-reduction process	-	-
Gohir.A05G289800	A05	36436506	36436730	225	GhZFPH4_DAP-vs-GhZFPH4_neg_peak_1689	4.30791	6.44539	2.56005	3.59E-07	0.00275391	Distal Intergenic	36445874	36448008	2135	1	Gohir.A05G289800.2	-9144	IPR001906,IPR005630,IPR008930,IPR008949,IPR036965	Terpene synthase, N-terminal domain|Terpene synthase, metal-binding domain|Terpenoid cyclases/protein prenyltransferase alpha-alpha toroid|Isoprenoid synthase domain superfamily|Terpene synthase, N-terminal domain superfamily	-	-	GO:0000287,GO:0010333,GO:0016829	magnesium ion binding|terpene synthase activity|lyase activity	-	-
Gohir.A05G294500	A05	38525400	38525563	164	GhZFPH4_DAP-vs-GhZFPH4_neg_peak_1694	4.30791	6.44539	2.56005	3.59E-07	0.00275391	Promoter (<=1kb)	38525493	38530502	5010	1	Gohir.A05G294500.1	0	IPR001611,IPR002182,IPR027417,IPR032675,IPR041118	Leucine-rich repeat|NB-ARC|P-loop containing nucleoside triphosphate hydrolase|Leucine-rich repeat domain superfamily|Rx, N-terminal	-	-	GO:0005515,GO:0043531	protein binding|ADP binding	-	-
Gohir.A05G295500	A05	38782462	38782626	165	GhZFPH4_DAP-vs-GhZFPH4_neg_peak_1695	4.30791	6.44539	2.56005	3.59E-07	0.00275391	Distal Intergenic	38710135	38713985	3851	2	Gohir.A05G295500.1	-68477	IPR002182,IPR027417,IPR032675,IPR041118	NB-ARC|P-loop containing nucleoside triphosphate hydrolase|Leucine-rich repeat domain superfamily|Rx, N-terminal	-	-	GO:0043531	ADP binding	-	-
Gohir.A05G301800	A05	41466647	41466803	157	GhZFPH4_DAP-vs-GhZFPH4_neg_peak_1701	4.30791	6.44539	2.56005	3.59E-07	0.00275391	Distal Intergenic	41437070	41444592	7523	2	Gohir.A05G301800.2	-22055	IPR002553,IPR011989,IPR016024,IPR026739,IPR026740,IPR029390	Clathrin/coatomer adaptor, adaptin-like, N-terminal|Armadillo-like helical|Armadillo-type fold|AP complex subunit beta|AP-3 complex subunit beta|AP-3 complex subunit beta, C-terminal domain	K12397	AP-3 complex subunit beta	GO:0006886,GO:0016192,GO:0030117,GO:0030123	intracellular protein transport|vesicle-mediated transport|membrane coat|AP-3 adaptor complex	ko01522,ko04142	Endocrine resistance|Lysosome
Gohir.A05G308150	A05	47046130	47046312	183	GhZFPH4_DAP-vs-GhZFPH4_neg_peak_1726	4.30791	6.44539	2.56005	3.59E-07	0.00275391	Distal Intergenic	46983923	46984498	576	2	Gohir.A05G308150.1	-61632	IPR001584,IPR012337,IPR036397	Integrase, catalytic core|Ribonuclease H-like superfamily|Ribonuclease H superfamily	-	-	GO:0003676,GO:0015074	nucleic acid binding|DNA integration	-	-
Gohir.A05G312400	A05	51794548	51794659	112	GhZFPH4_DAP-vs-GhZFPH4_neg_peak_1746	4.30791	6.44539	2.56005	3.59E-07	0.00275391	Distal Intergenic	52073829	52075376	1548	1	Gohir.A05G312400.2	-279170	IPR002259,IPR003690,IPR038538	Equilibrative nucleoside transporter|Transcription termination factor, mitochondrial/chloroplastic|MTERF superfamily, mitochondrial/chloroplastic	K15032	mTERF domain-containing protein, mitochondrial	GO:0003690,GO:0005337,GO:0006355,GO:0016021,GO:1901642	double-stranded DNA binding|nucleoside transmembrane transporter activity|regulation of transcription, DNA-templated|integral component of membrane|nucleoside transmembrane transport	ko01522	Endocrine resistance
Gohir.A05G312500	A05	52311914	52312074	161	GhZFPH4_DAP-vs-GhZFPH4_neg_peak_1748	4.30791	6.44539	2.56005	3.59E-07	0.00275391	Distal Intergenic	52356478	52357652	1175	1	Gohir.A05G312500.1	-44404	IPR003808	Fe-S metabolism associated domain, SufE-like	-	-	-	-	-	-
Gohir.A05G314324	A05	69739012	69739130	119	GhZFPH4_DAP-vs-GhZFPH4_neg_peak_1826	4.30791	6.44539	2.56005	3.59E-07	0.00275391	Distal Intergenic	69661492	69662901	1410	2	Gohir.A05G314324.1	-76111	IPR001005,IPR009057,IPR015495,IPR017930	SANT/Myb domain|Homeobox-like domain superfamily|Myb-like transcription factor|Myb domain	K09422	transcription factor MYB, plant	GO:0003677	DNA binding	ko01522	Endocrine resistance
Gohir.A05G324701	A05	60770643	60770789	147	GhZFPH4_DAP-vs-GhZFPH4_neg_peak_1777	4.30791	6.44539	2.56005	3.59E-07	0.00275391	Distal Intergenic	60851666	60855463	3798	2	Gohir.A05G324701.1	84674	IPR004088,IPR009019,IPR036612	K Homology domain, type 1|K homology domain superfamily, prokaryotic type|K Homology domain, type 1 superfamily	-	-	GO:0003723	RNA binding	-	-
Gohir.A05G334800	A05	82497692	82497924	233	GhZFPH4_DAP-vs-GhZFPH4_neg_peak_1865	4.30791	6.44539	2.56005	3.59E-07	0.00275391	Distal Intergenic	82563100	82565628	2529	2	Gohir.A05G334800.2	67704	-	-	-	-	-	-	ko04141	Protein processing in endoplasmic reticulum
Gohir.A05G345830	A05	91075283	91075660	378	GhZFPH4_DAP-vs-GhZFPH4_neg_peak_1893	4.30791	6.44539	2.56005	3.59E-07	0.00275391	Distal Intergenic	91631522	91634361	2840	2	Gohir.A05G345830.1	558701	IPR001320,IPR001638,IPR001828,IPR028082	Ionotropic glutamate receptor|Solute-binding protein family 3/N-terminal domain of MltF|Receptor, ligand binding region|Periplasmic binding protein-like I	-	-	GO:0015276,GO:0016020	ligand-gated ion channel activity|membrane	-	-
Gohir.A05G345830	A05	91514399	91514562	164	GhZFPH4_DAP-vs-GhZFPH4_neg_peak_1896	4.30791	6.44539	2.56005	3.59E-07	0.00275391	Distal Intergenic	91631522	91634361	2840	2	Gohir.A05G345830.1	119799	IPR001320,IPR001638,IPR001828,IPR028082	Ionotropic glutamate receptor|Solute-binding protein family 3/N-terminal domain of MltF|Receptor, ligand binding region|Periplasmic binding protein-like I	-	-	GO:0015276,GO:0016020	ligand-gated ion channel activity|membrane	-	-
Gohir.A05G345842	A05	92730347	92730558	212	GhZFPH4_DAP-vs-GhZFPH4_neg_peak_1899	4.30791	6.44539	2.56005	3.59E-07	0.00275391	Distal Intergenic	92939089	92941925	2837	1	Gohir.A05G345842.2	-208531	IPR008546,IPR013666,IPR040269	Domain of unknown function DUF828|Pleckstrin-like, plant|VAN3-binding protein	-	-	-	-	-	-
Gohir.A05G345884	A05	94594823	94594971	149	GhZFPH4_DAP-vs-GhZFPH4_neg_peak_1909	4.30791	6.44539	2.56005	3.59E-07	0.00275391	Distal Intergenic	94608140	94611010	2871	1	Gohir.A05G345884.1	-13169	IPR011990,IPR013026,IPR013105,IPR019734	Tetratricopeptide-like helical domain superfamily|Tetratricopeptide repeat-containing domain|Tetratricopeptide repeat 2|Tetratricopeptide repeat	-	-	GO:0005515	protein binding	-	-
Gohir.A05G372000	A05	102824851	102824969	119	GhZFPH4_DAP-vs-GhZFPH4_neg_peak_1922	4.30791	6.44539	2.56005	3.59E-07	0.00275391	Distal Intergenic	102840961	102842536	1576	2	Gohir.A05G372000.1	17567	IPR002213	UDP-glucuronosyl/UDP-glucosyltransferase	-	-	GO:0008194	UDP-glycosyltransferase activity	-	-
Gohir.A05G384700	A05	106138580	106138734	155	GhZFPH4_DAP-vs-GhZFPH4_neg_peak_1934	4.30791	6.44539	2.56005	3.59E-07	0.00275391	Distal Intergenic	106112770	106132133	19364	2	Gohir.A05G384700.4	-6447	IPR003439,IPR027417	ABC transporter-like|P-loop containing nucleoside triphosphate hydrolase	-	-	GO:0005524,GO:0016887	ATP binding|ATPase activity	-	-
Gohir.A06G045800	A06	7844812	7845058	247	GhZFPH4_DAP-vs-GhZFPH4_neg_peak_1972	4.30791	6.44539	2.56005	3.59E-07	0.00275391	Exon (Gohir.A06G045700.1/Gohir.A06G045700, exon 6 of 10)	7846630	7849026	2397	2	Gohir.A06G045800.1	3968	IPR002939,IPR008971	Chaperone DnaJ, C-terminal|HSP40/DnaJ peptide-binding	-	-	GO:0006457,GO:0051082	protein folding|unfolded protein binding	ko01522	Endocrine resistance
Gohir.A06G065900	A06	16165329	16165492	164	GhZFPH4_DAP-vs-GhZFPH4_neg_peak_1996	4.30791	6.44539	2.56005	3.59E-07	0.00275391	Distal Intergenic	16105471	16106238	768	1	Gohir.A06G065900.1	59858	IPR001471,IPR016177,IPR036955	AP2/ERF domain|DNA-binding domain superfamily|AP2/ERF domain superfamily	K09286	EREBP-like factor	GO:0003677,GO:0003700,GO:0006355	DNA binding|DNA-binding transcription factor activity|regulation of transcription, DNA-templated	ko01522	Endocrine resistance
Gohir.A06G077800	A06	20761793	20761994	202	GhZFPH4_DAP-vs-GhZFPH4_neg_peak_2016	4.30791	6.44539	2.56005	3.59E-07	0.00275391	Distal Intergenic	20749664	20752184	2521	2	Gohir.A06G077800.1	-9609	IPR005178	Organic solute transporter subunit alpha/Transmembrane protein 184	-	-	-	-	-	-
Gohir.A06G081700	A06	26087821	26088160	340	GhZFPH4_DAP-vs-GhZFPH4_neg_peak_2031	4.30791	6.44539	2.56005	3.59E-07	0.00275391	Distal Intergenic	26098971	26103622	4652	1	Gohir.A06G081700.1	-10811	IPR006094,IPR015345,IPR016164,IPR016166,IPR016167,IPR016169,IPR016170,IPR036318	FAD linked oxidase, N-terminal|Cytokinin dehydrogenase 1, FAD/cytokinin binding domain|FAD-linked oxidase-like, C-terminal|FAD-binding domain, PCMH-type|FAD-binding, type PCMH, subdomain 1|FAD-binding, type PCMH, subdomain 2|Cytokinin dehydrogenase, C-terminal domain superfamily|FAD-binding, type PCMH-like superfamily	K00279	cytokinin dehydrogenase [EC:1.5.99.12]	GO:0003824,GO:0009690,GO:0016491,GO:0019139,GO:0050660,GO:0055114,GO:0071949	catalytic activity|cytokinin metabolic process|oxidoreductase activity|cytokinin dehydrogenase activity|flavin adenine dinucleotide binding|oxidation-reduction process|FAD binding	ko00908	Zeatin biosynthesis
Gohir.A06G087500	A06	30192478	30192696	219	GhZFPH4_DAP-vs-GhZFPH4_neg_peak_2042	4.30791	6.44539	2.56005	3.59E-07	0.00275391	Distal Intergenic	30109063	30110850	1788	2	Gohir.A06G087500.1	-81628	IPR008480,IPR025520	Protein of unknown function DUF761, plant|Domain of unknown function DUF4408	-	-	-	-	-	-
Gohir.A06G098216	A06	37557068	37557239	172	GhZFPH4_DAP-vs-GhZFPH4_neg_peak_2059	4.30791	6.44539	2.56005	3.59E-07	0.00275391	Distal Intergenic	37568885	37574604	5720	1	Gohir.A06G098216.1	-11646	IPR011990,IPR013026	Tetratricopeptide-like helical domain superfamily|Tetratricopeptide repeat-containing domain	-	-	GO:0005515	protein binding	-	-
Gohir.A06G102600	A06	41590319	41590513	195	GhZFPH4_DAP-vs-GhZFPH4_neg_peak_2068	4.30791	6.44539	2.56005	3.59E-07	0.00275391	Promoter (2-3kb)	41587981	41590460	2480	1	Gohir.A06G102600.2	2338	-	-	-	-	-	-	-	-
Gohir.A06G107500	A06	48990510	48990786	277	GhZFPH4_DAP-vs-GhZFPH4_neg_peak_2115	4.30791	6.44539	2.56005	3.59E-07	0.00275391	Distal Intergenic	49093379	49105504	12126	2	Gohir.A06G107500.1	114718	IPR006204,IPR012369,IPR014721,IPR019539,IPR020568,IPR036554	GHMP kinase N-terminal domain|Galactokinase, glycosyltransferase|Ribosomal protein S5 domain 2-type fold, subgroup|Galactokinase galactose-binding domain|Ribosomal protein S5 domain 2-type fold|GHMP kinase, C-terminal domain superfamily	K12446	L-arabinokinase [EC:2.7.1.46]	GO:0005524,GO:0005534	ATP binding|galactose binding	ko00520	Amino sugar and nucleotide sugar metabolism
Gohir.A06G112700	A06	58415491	58415634	144	GhZFPH4_DAP-vs-GhZFPH4_neg_peak_2147	4.30791	6.44539	2.56005	3.59E-07	0.00275391	Distal Intergenic	58280048	58282557	2510	1	Gohir.A06G112700.1	135443	IPR003690,IPR038538	Transcription termination factor, mitochondrial/chloroplastic|MTERF superfamily, mitochondrial/chloroplastic	K15032	mTERF domain-containing protein, mitochondrial	GO:0003690,GO:0006355	double-stranded DNA binding|regulation of transcription, DNA-templated	ko01522	Endocrine resistance
Gohir.A06G118302	A06	73001183	73001391	209	GhZFPH4_DAP-vs-GhZFPH4_neg_peak_2190	4.30791	6.44539	2.56005	3.59E-07	0.00275391	Distal Intergenic	73034568	73035558	991	2	Gohir.A06G118302.1	34167	IPR010471	Protein of unknown function DUF1068	-	-	-	-	-	-
Gohir.A06G118800	A06	63770457	63770596	140	GhZFPH4_DAP-vs-GhZFPH4_neg_peak_2160	4.30791	6.44539	2.56005	3.59E-07	0.00275391	Distal Intergenic	63672143	63678299	6157	2	Gohir.A06G118800.1	-92158	IPR011011,IPR013083,IPR019787,IPR021998	Zinc finger, FYVE/PHD-type|Zinc finger, RING/FYVE/PHD-type|Zinc finger, PHD-finger|Alfin	-	-	GO:0006355,GO:0042393	regulation of transcription, DNA-templated|histone binding	-	-
Gohir.A06G119300	A06	64919090	64919202	113	GhZFPH4_DAP-vs-GhZFPH4_neg_peak_2161	4.30791	6.44539	2.56005	3.59E-07	0.00275391	Distal Intergenic	64934321	64940260	5940	1	Gohir.A06G119300.1	-15119	IPR005101,IPR006050,IPR014729,IPR036134,IPR036155	Cryptochrome/DNA photolyase, FAD-binding domain|DNA photolyase, N-terminal|Rossmann-like alpha/beta/alpha sandwich fold|Cryptochrome/DNA photolyase, FAD-binding domain-like superfamily|Cryptochrome/photolyase, N-terminal domain superfamily	-	-	-	-	ko01522,ko04710	Endocrine resistance|Circadian rhythm
Gohir.A06G119800	A06	78472341	78472544	204	GhZFPH4_DAP-vs-GhZFPH4_neg_peak_2214	4.30791	6.44539	2.56005	3.59E-07	0.00275391	Distal Intergenic	78417249	78423692	6444	1	Gohir.A06G119800.1	55092	IPR006694	Fatty acid hydroxylase	K19706	dihydroceramide fatty acyl 2-hydroxylase [EC:1.14.18.7]	GO:0005506,GO:0008610,GO:0016491,GO:0055114	iron ion binding|lipid biosynthetic process|oxidoreductase activity|oxidation-reduction process	ko01522	Endocrine resistance
Gohir.A06G122800	A06	93366237	93366442	206	GhZFPH4_DAP-vs-GhZFPH4_neg_peak_2277	4.30791	6.44539	2.56005	3.59E-07	0.00275391	Distal Intergenic	92922051	92923467	1417	1	Gohir.A06G122800.1	444186	IPR001005,IPR009057,IPR015495,IPR017930	SANT/Myb domain|Homeobox-like domain superfamily|Myb-like transcription factor|Myb domain	K09422	transcription factor MYB, plant	GO:0003677	DNA binding	ko01522	Endocrine resistance
Gohir.A06G128002	A06	97372499	97372650	152	GhZFPH4_DAP-vs-GhZFPH4_neg_peak_2289	4.30791	6.44539	2.56005	3.59E-07	0.00275391	Distal Intergenic	97318118	97319071	954	1	Gohir.A06G128002.1	54381	IPR004274,IPR011948,IPR023214,IPR036412	FCP1 homology domain|Dullard phosphatase domain, eukaryotic|HAD superfamily|HAD-like superfamily	K15731	carboxy-terminal domain RNA polymerase II polypeptide A small phosphatase [EC:3.1.3.16]	GO:0016791	phosphatase activity	ko01522	Endocrine resistance
Gohir.A06G129500	A06	85873500	85873983	484	GhZFPH4_DAP-vs-GhZFPH4_neg_peak_2251	4.30791	6.44539	2.56005	3.59E-07	0.00275391	Distal Intergenic	86034509	86039695	5187	1	Gohir.A06G129500.1	-160526	IPR009003,IPR039245,IPR043504	Peptidase S1, PA clan|Peroxisomal/glyoxysomal leader peptide-processing protease|Peptidase S1, PA clan, chymotrypsin-like fold	K23012	peroxisomal leader peptide-processing protease [EC:3.4.21.-]	GO:0004252,GO:0005777,GO:0016485	serine-type endopeptidase activity|peroxisome|protein processing	ko01522	Endocrine resistance
Gohir.A06G129500	A06	85898621	85898781	161	GhZFPH4_DAP-vs-GhZFPH4_neg_peak_2252	4.30791	6.44539	2.56005	3.59E-07	0.00275391	Distal Intergenic	86034509	86039695	5187	1	Gohir.A06G129500.1	-135728	IPR009003,IPR039245,IPR043504	Peptidase S1, PA clan|Peroxisomal/glyoxysomal leader peptide-processing protease|Peptidase S1, PA clan, chymotrypsin-like fold	K23012	peroxisomal leader peptide-processing protease [EC:3.4.21.-]	GO:0004252,GO:0005777,GO:0016485	serine-type endopeptidase activity|peroxisome|protein processing	ko01522	Endocrine resistance
Gohir.A06G131200	A06	99416929	99417153	225	GhZFPH4_DAP-vs-GhZFPH4_neg_peak_2292	4.30791	6.44539	2.56005	3.59E-07	0.00275391	Distal Intergenic	99429861	99431966	2106	1	Gohir.A06G131200.1	-12708	IPR032675,IPR041567	Leucine-rich repeat domain superfamily|COI1, F-box	-	-	-	-	-	-
Gohir.A06G131200	A06	99429719	99430060	342	GhZFPH4_DAP-vs-GhZFPH4_neg_peak_2293	4.30791	6.44539	2.56005	3.59E-07	0.00275391	Promoter (<=1kb)	99429861	99431966	2106	1	Gohir.A06G131200.1	0	IPR032675,IPR041567	Leucine-rich repeat domain superfamily|COI1, F-box	-	-	-	-	-	-
Gohir.A06G132502	A06	100896896	100897109	214	GhZFPH4_DAP-vs-GhZFPH4_neg_peak_2296	4.30791	6.44539	2.56005	3.59E-07	0.00275391	Distal Intergenic	100906388	100908488	2101	2	Gohir.A06G132502.1	11379	IPR001932,IPR015655,IPR036457	PPM-type phosphatase domain|Protein phosphatase 2C family|PPM-type phosphatase domain superfamily	-	-	GO:0003824,GO:0004722,GO:0006470	catalytic activity|protein serine/threonine phosphatase activity|protein dephosphorylation	-	-
Gohir.A06G134002	A06	103702919	103703072	154	GhZFPH4_DAP-vs-GhZFPH4_neg_peak_2304	4.30791	6.44539	2.56005	3.59E-07	0.00275391	Distal Intergenic	103615494	103616608	1115	1	Gohir.A06G134002.1	87425	IPR000668,IPR013201,IPR038765	Peptidase C1A, papain C-terminal|Cathepsin propeptide inhibitor domain (I29)|Papain-like cysteine peptidase superfamily	-	-	GO:0006508,GO:0008234	proteolysis|cysteine-type peptidase activity	-	-
Gohir.A06G138200	A06	34529064	34529300	237	GhZFPH4_DAP-vs-GhZFPH4_neg_peak_2055	4.30791	6.44539	2.56005	3.59E-07	0.00275391	Distal Intergenic	34603531	34606927	3397	2	Gohir.A06G138200.1	77627	IPR006867,IPR006868	Domain of unknown function DUF632|Domain of unknown function DUF630	-	-	-	-	-	-
Gohir.A06G142300	A06	111418014	111418288	275	GhZFPH4_DAP-vs-GhZFPH4_neg_peak_2328	4.30791	6.44539	2.56005	3.59E-07	0.00275391	Distal Intergenic	111392131	111393819	1689	2	Gohir.A06G142300.5	-24195	IPR001841,IPR013083,IPR017066	Zinc finger, RING-type|Zinc finger, RING/FYVE/PHD-type|E3 ubiquitin-protein ligase BOI-like	K19042	E3 ubiquitin-protein ligase BOI and related proteins [EC:2.3.2.27]	-	-	ko01522	Endocrine resistance
Gohir.A06G149900	A06	117465235	117465352	118	GhZFPH4_DAP-vs-GhZFPH4_neg_peak_2349	4.30791	6.44539	2.56005	3.59E-07	0.00275391	Distal Intergenic	117471992	117474434	2443	1	Gohir.A06G149900.2	-6640	IPR003657,IPR036576	WRKY domain|WRKY domain superfamily	-	-	GO:0003700,GO:0006355,GO:0043565	DNA-binding transcription factor activity|regulation of transcription, DNA-templated|sequence-specific DNA binding	-	-
Gohir.A06G151500	A06	117854673	117854829	157	GhZFPH4_DAP-vs-GhZFPH4_neg_peak_2353	4.30791	6.44539	2.56005	3.59E-07	0.00275391	Distal Intergenic	117864756	117870481	5726	2	Gohir.A06G151500.1	15652	IPR000023,IPR011183,IPR022953,IPR035966	Phosphofructokinase domain|Pyrophosphate-dependent phosphofructokinase PfpB|ATP-dependent 6-phosphofructokinase|Phosphofructokinase superfamily	K00895	diphosphate-dependent phosphofructokinase [EC:2.7.1.90]	GO:0003872,GO:0005524,GO:0006002,GO:0006096,GO:0047334	6-phosphofructokinase activity|ATP binding|fructose 6-phosphate metabolic process|glycolytic process|diphosphate-fructose-6-phosphate 1-phosphotransferase activity	ko00010,ko00030,ko00051	Glycolysis / Gluconeogenesis|Pentose phosphate pathway|Fructose and mannose metabolism
Gohir.A07G020200	A07	2283931	2284164	234	GhZFPH4_DAP-vs-GhZFPH4_neg_peak_2381	4.30791	6.44539	2.56005	3.59E-07	0.00275391	Promoter (2-3kb)	2286644	2288108	1465	1	Gohir.A07G020200.1	-2480	IPR001005,IPR009057,IPR015495,IPR017930	SANT/Myb domain|Homeobox-like domain superfamily|Myb-like transcription factor|Myb domain	K09422	transcription factor MYB, plant	GO:0003677	DNA binding	ko01522	Endocrine resistance
Gohir.A07G041300	A07	5428775	5428906	132	GhZFPH4_DAP-vs-GhZFPH4_neg_peak_2388	4.30791	6.44539	2.56005	3.59E-07	0.00275391	Intron (Gohir.A07G041300.1/Gohir.A07G041300, intron 2 of 11)	5422522	5432222	9701	2	Gohir.A07G041300.1	3316	IPR001841,IPR003892,IPR013083	Zinc finger, RING-type|Ubiquitin system component CUE|Zinc finger, RING/FYVE/PHD-type	K10636	autocrine motility factor receptor [EC:2.3.2.27]	GO:0005515	protein binding	ko01522,ko04141	Endocrine resistance|Protein processing in endoplasmic reticulum
Gohir.A07G058200	A07	7804094	7804419	326	GhZFPH4_DAP-vs-GhZFPH4_neg_peak_2396	4.30791	6.44539	2.56005	3.59E-07	0.00275391	Promoter (2-3kb)	7803672	7806845	3174	2	Gohir.A07G058200.1	2426	IPR000403	Phosphatidylinositol 3-/4-kinase, catalytic domain	-	-	-	-	-	-
Gohir.A07G076900	A07	11304997	11305101	105	GhZFPH4_DAP-vs-GhZFPH4_neg_peak_2405	4.30791	6.44539	2.56005	3.59E-07	0.00275391	Distal Intergenic	11312721	11315084	2364	2	Gohir.A07G076900.1	9983	IPR011598,IPR036638	Myc-type, basic helix-loop-helix (bHLH) domain|Helix-loop-helix DNA-binding domain superfamily	-	-	GO:0046983	protein dimerization activity	-	-
Gohir.A07G077666	A07	11815626	11815857	232	GhZFPH4_DAP-vs-GhZFPH4_neg_peak_2407	4.30791	6.44539	2.56005	3.59E-07	0.00275391	Distal Intergenic	11850111	11855178	5068	2	Gohir.A07G077666.1	39321	IPR040359	Protein glutamine dumper	-	-	GO:0080143	regulation of amino acid export	-	-
Gohir.A07G092700	A07	15741495	15741640	146	GhZFPH4_DAP-vs-GhZFPH4_neg_peak_2419	4.30791	6.44539	2.56005	3.59E-07	0.00275391	Promoter (1-2kb)	15740118	15743391	3274	2	Gohir.A07G092700.1	1751	IPR002495,IPR029044,IPR029993	Glycosyl transferase, family 8|Nucleotide-diphospho-sugar transferases|Plant galacturonosyltransferase GAUT	K13648	alpha-1,4-galacturonosyltransferase [EC:2.4.1.43]	GO:0016757,GO:0047262	transferase activity, transferring glycosyl groups|polygalacturonate 4-alpha-galacturonosyltransferase activity	ko00520,ko01522	Amino sugar and nucleotide sugar metabolism|Endocrine resistance
Gohir.A07G095800	A07	16654995	16655107	113	GhZFPH4_DAP-vs-GhZFPH4_neg_peak_2421	4.30791	6.44539	2.56005	3.59E-07	0.00275391	Distal Intergenic	16640695	16643953	3259	1	Gohir.A07G095800.1	14300	IPR010369,IPR021182	Protein of unknown function DUF966|Upstream of FLC	-	-	-	-	-	-
Gohir.A07G107100	A07	19768064	19768329	266	GhZFPH4_DAP-vs-GhZFPH4_neg_peak_2429	4.30791	6.44539	2.56005	3.59E-07	0.00275391	Exon (Gohir.A07G107200.1/Gohir.A07G107200, exon 8 of 11)	19758635	19764651	6017	2	Gohir.A07G107100.1	-3413	IPR003409	MORN motif	-	-	-	-	-	-
Gohir.A07G109601	A07	20349210	20349511	302	GhZFPH4_DAP-vs-GhZFPH4_neg_peak_2431	4.30791	6.44539	2.56005	3.59E-07	0.00275391	Distal Intergenic	20299364	20301810	2447	2	Gohir.A07G109601.1	-47400	IPR013087,IPR036236	Zinc finger C2H2-type|Zinc finger C2H2 superfamily	-	-	-	-	-	-
Gohir.A07G111100	A07	20922843	20922947	105	GhZFPH4_DAP-vs-GhZFPH4_neg_peak_2432	4.30791	6.44539	2.56005	3.59E-07	0.00275391	Promoter (<=1kb)	20922740	20923765	1026	1	Gohir.A07G111100.1	103	IPR001810,IPR036047	F-box domain|F-box-like domain superfamily	-	-	GO:0005515	protein binding	-	-
Gohir.A07G117750	A07	23195530	23195652	123	GhZFPH4_DAP-vs-GhZFPH4_neg_peak_2436	4.30791	6.44539	2.56005	3.59E-07	0.00275391	Distal Intergenic	23162059	23168211	6153	2	Gohir.A07G117750.1	-27319	IPR009646	Root cap	-	-	-	-	-	-
Gohir.A07G149400	A07	39487024	39487129	106	GhZFPH4_DAP-vs-GhZFPH4_neg_peak_2480	4.30791	6.44539	2.56005	3.59E-07	0.00275391	Distal Intergenic	39579036	39580822	1787	1	Gohir.A07G149400.2	-91907	IPR000644,IPR001347,IPR004800	CBS domain|Sugar isomerase (SIS)|Phosphosugar isomerase, KdsD/KpsF-type	K06041	arabinose-5-phosphate isomerase [EC:5.3.1.13]	GO:0005975,GO:0016853,GO:0097367,GO:1901135	carbohydrate metabolic process|isomerase activity|carbohydrate derivative binding|carbohydrate derivative metabolic process	ko00540,ko01522	Lipopolysaccharide biosynthesis|Endocrine resistance
Gohir.A07G150300	A07	40686654	40686838	185	GhZFPH4_DAP-vs-GhZFPH4_neg_peak_2486	4.30791	6.44539	2.56005	3.59E-07	0.00275391	Distal Intergenic	40622175	40623900	1726	2	Gohir.A07G150300.1	-62754	IPR001611,IPR032675	Leucine-rich repeat|Leucine-rich repeat domain superfamily	-	-	GO:0005515	protein binding	-	-
Gohir.A07G161305	A07	49449771	49449922	152	GhZFPH4_DAP-vs-GhZFPH4_neg_peak_2513	4.30791	6.44539	2.56005	3.59E-07	0.00275391	Distal Intergenic	49791473	49793473	2001	1	Gohir.A07G161305.1	-341551	-	-	-	-	-	-	-	-
Gohir.A07G164700	A07	66559506	66559651	146	GhZFPH4_DAP-vs-GhZFPH4_neg_peak_2598	4.30791	6.44539	2.56005	3.59E-07	0.00275391	Distal Intergenic	66596205	66600356	4152	2	Gohir.A07G164700.1	40705	IPR001199,IPR025846,IPR036400,IPR039910	Cytochrome b5-like heme/steroid binding domain|PMR5 N-terminal domain|Cytochrome b5-like heme/steroid binding domain superfamily|Surface antigen D15-like	-	-	-	-	-	-
Gohir.A07G169850	A07	57521515	57521833	319	GhZFPH4_DAP-vs-GhZFPH4_neg_peak_2556	4.30791	6.44539	2.56005	3.59E-07	0.00275391	Distal Intergenic	57501614	57506421	4808	2	Gohir.A07G169850.1	-15094	IPR001841,IPR013083,IPR024766	Zinc finger, RING-type|Zinc finger, RING/FYVE/PHD-type|Zinc finger, RING-H2-type	-	-	GO:0008270	zinc ion binding	-	-
Gohir.A07G173200	A07	60100978	60101388	411	GhZFPH4_DAP-vs-GhZFPH4_neg_peak_2573	4.30791	6.44539	2.56005	3.59E-07	0.00275391	Distal Intergenic	59965590	59967330	1741	2	Gohir.A07G173200.1	-133648	IPR000116,IPR005818,IPR017956,IPR031059,IPR036388,IPR036390	High mobility group protein HMGA|Linker histone H1/H5, domain H15|AT hook, DNA-binding motif|High mobility group protein HMGA, plant|Winged helix-like DNA-binding domain superfamily|Winged helix DNA-binding domain superfamily	-	-	GO:0000785,GO:0000786,GO:0003677,GO:0005634,GO:0006334,GO:0006355,GO:0042025	chromatin|nucleosome|DNA binding|nucleus|nucleosome assembly|regulation of transcription, DNA-templated|host cell nucleus	-	-
Gohir.A07G173300	A07	59631957	59632095	139	GhZFPH4_DAP-vs-GhZFPH4_neg_peak_2571	4.30791	6.44539	2.56005	3.59E-07	0.00275391	Distal Intergenic	59826366	59829386	3021	1	Gohir.A07G173300.1	-194271	IPR000308,IPR023410,IPR036815	14-3-3 protein|14-3-3 domain|14-3-3 domain superfamily	K06630	14-3-3 protein epsilon	-	-	ko01522,ko04011,ko04110,ko04114,ko04151,ko04390,ko04391,ko04621,ko04722,ko05160,ko05203	Endocrine resistance|MAPK signaling pathway - yeast|Cell cycle|Oocyte meiosis|PI3K-Akt signaling pathway|Hippo signaling pathway|Hippo signaling pathway - fly|NOD-like receptor signaling pathway|Neurotrophin signaling pathway|Hepatitis C|Viral carcinogenesis
Gohir.A07G175934	A07	63642426	63642599	174	GhZFPH4_DAP-vs-GhZFPH4_neg_peak_2585	4.30791	6.44539	2.56005	3.59E-07	0.00275391	Distal Intergenic	63593489	63595115	1627	2	Gohir.A07G175934.1	-47311	IPR001810,IPR013187,IPR017451,IPR036047	F-box domain|F-box associated domain, type 3|F-box associated interaction domain|F-box-like domain superfamily	-	-	GO:0005515	protein binding	-	-
Gohir.A07G175934	A07	63785384	63785555	172	GhZFPH4_DAP-vs-GhZFPH4_neg_peak_2586	4.30791	6.44539	2.56005	3.59E-07	0.00275391	Distal Intergenic	63593489	63595115	1627	2	Gohir.A07G175934.1	-190269	IPR001810,IPR013187,IPR017451,IPR036047	F-box domain|F-box associated domain, type 3|F-box associated interaction domain|F-box-like domain superfamily	-	-	GO:0005515	protein binding	-	-
Gohir.A07G175934	A07	63827043	63827358	316	GhZFPH4_DAP-vs-GhZFPH4_neg_peak_2587	4.30791	6.44539	2.56005	3.59E-07	0.00275391	Distal Intergenic	63593489	63595115	1627	2	Gohir.A07G175934.1	-231928	IPR001810,IPR013187,IPR017451,IPR036047	F-box domain|F-box associated domain, type 3|F-box associated interaction domain|F-box-like domain superfamily	-	-	GO:0005515	protein binding	-	-
Gohir.A07G177900	A07	81909473	81909683	211	GhZFPH4_DAP-vs-GhZFPH4_neg_peak_2648	4.30791	6.44539	2.56005	3.59E-07	0.00275391	Distal Intergenic	81898902	81899441	540	1	Gohir.A07G177900.1	10571	IPR004827	Basic-leucine zipper domain	-	-	GO:0003700,GO:0006355	DNA-binding transcription factor activity|regulation of transcription, DNA-templated	-	-
Gohir.A07G178450	A07	82228348	82228661	314	GhZFPH4_DAP-vs-GhZFPH4_neg_peak_2651	4.30791	6.44539	2.56005	3.59E-07	0.00275391	Distal Intergenic	82236223	82238951	2729	1	Gohir.A07G178450.2	-7562	-	-	-	-	-	-	-	-
Gohir.A07G193700	A07	92216184	92216337	154	GhZFPH4_DAP-vs-GhZFPH4_neg_peak_2717	4.30791	6.44539	2.56005	3.59E-07	0.00275391	Distal Intergenic	92176105	92189229	13125	2	Gohir.A07G193700.1	-26955	IPR040229	Uncharacterized membrane protein At3g27390-like	-	-	-	-	-	-
Gohir.A07G194500	A07	92488369	92488583	215	GhZFPH4_DAP-vs-GhZFPH4_neg_peak_2718	4.30791	6.44539	2.56005	3.59E-07	0.00275391	Exon (Gohir.A07G194500.1/Gohir.A07G194500, exon 6 of 6)	92484081	92489158	5078	1	Gohir.A07G194500.2	4288	IPR006447,IPR009057	Myb domain, plants|Homeobox-like domain superfamily	-	-	GO:0003677	DNA binding	-	-
Gohir.A07G196400	A07	92975543	92975796	254	GhZFPH4_DAP-vs-GhZFPH4_neg_peak_2719	4.30791	6.44539	2.56005	3.59E-07	0.00275391	Distal Intergenic	92967681	92969082	1402	1	Gohir.A07G196400.1	7862	IPR007493,IPR036758	Protein of unknown function DUF538|At5g01610-like superfamily	-	-	-	-	-	-
Gohir.A07G202550	A07	94012112	94012247	136	GhZFPH4_DAP-vs-GhZFPH4_neg_peak_2722	4.30791	6.44539	2.56005	3.59E-07	0.00275391	Downstream (2-3kb)	94014435	94022244	7810	2	Gohir.A07G202550.1	9997	-	-	-	-	-	-	-	-
Gohir.A08G016300	A08	2052470	2052744	275	GhZFPH4_DAP-vs-GhZFPH4_neg_peak_2738	4.30791	6.44539	2.56005	3.59E-07	0.00275391	Promoter (1-2kb)	2054318	2060293	5976	1	Gohir.A08G016300.3	-1574	-	-	-	-	-	-	-	-
Gohir.A08G028300	A08	3465068	3465542	475	GhZFPH4_DAP-vs-GhZFPH4_neg_peak_2743	4.30791	6.44539	2.56005	3.59E-07	0.00275391	Distal Intergenic	3454699	3461495	6797	2	Gohir.A08G028300.7	-3573	IPR011011,IPR013083,IPR019787,IPR026850	Zinc finger, FYVE/PHD-type|Zinc finger, RING/FYVE/PHD-type|Zinc finger, PHD-finger|FANCL C-terminal domain	-	-	-	-	-	-
Gohir.A08G041201	A08	5446842	5446988	147	GhZFPH4_DAP-vs-GhZFPH4_neg_peak_2748	4.30791	6.44539	2.56005	3.59E-07	0.00275391	Distal Intergenic	5488618	5489577	960	1	Gohir.A08G041201.1	-41630	-	-	-	-	-	-	-	-
Gohir.A08G060400	A08	9753580	9753700	121	GhZFPH4_DAP-vs-GhZFPH4_neg_peak_2758	4.30791	6.44539	2.56005	3.59E-07	0.00275391	Distal Intergenic	9710695	9712063	1369	1	Gohir.A08G060400.2	42885	IPR004883	Lateral organ boundaries, LOB	K13945	LOB domain-containing protein 29	-	-	ko01522	Endocrine resistance
Gohir.A08G066700	A08	11665048	11665363	316	GhZFPH4_DAP-vs-GhZFPH4_neg_peak_2767	4.30791	6.44539	2.56005	3.59E-07	0.00275391	Downstream (<1kb)	11656482	11660075	3594	2	Gohir.A08G066700.1	-4973	IPR008546,IPR013666,IPR040269	Domain of unknown function DUF828|Pleckstrin-like, plant|VAN3-binding protein	-	-	-	-	-	-
Gohir.A08G078850	A08	19502209	19502616	408	GhZFPH4_DAP-vs-GhZFPH4_neg_peak_2799	4.30791	6.44539	2.56005	3.59E-07	0.00275391	Distal Intergenic	19509931	19515976	6046	2	Gohir.A08G078850.1	13360	-	-	-	-	-	-	-	-
Gohir.A08G078850	A08	19542500	19542904	405	GhZFPH4_DAP-vs-GhZFPH4_neg_peak_2801	4.30791	6.44539	2.56005	3.59E-07	0.00275391	Distal Intergenic	19509931	19515976	6046	2	Gohir.A08G078850.1	-26524	-	-	-	-	-	-	-	-
Gohir.A08G082562	A08	25124391	25124773	383	GhZFPH4_DAP-vs-GhZFPH4_neg_peak_2826	4.30791	6.44539	2.56005	3.59E-07	0.00275391	Distal Intergenic	25267701	25269554	1854	2	Gohir.A08G082562.1	144781	IPR001117,IPR008972,IPR011706,IPR011707	Multicopper oxidase, type 1|Cupredoxin|Multicopper oxidase, type 2|Multicopper oxidase, type 3	-	-	GO:0005507,GO:0016491,GO:0055114	copper ion binding|oxidoreductase activity|oxidation-reduction process	-	-
Gohir.A08G084400	A08	29442478	29442750	273	GhZFPH4_DAP-vs-GhZFPH4_neg_peak_2836	4.30791	6.44539	2.56005	3.59E-07	0.00275391	Distal Intergenic	29432207	29433317	1111	1	Gohir.A08G084400.1	10271	-	-	-	-	-	-	-	-
Gohir.A08G088562	A08	44853210	44853347	138	GhZFPH4_DAP-vs-GhZFPH4_neg_peak_2893	4.30791	6.44539	2.56005	3.59E-07	0.00275391	Distal Intergenic	44892619	44895856	3238	1	Gohir.A08G088562.1	-39272	IPR008811,IPR017853	Glycosyl hydrolases 36|Glycoside hydrolase superfamily	K06617	raffinose synthase [EC:2.4.1.82]	-	-	ko00052	Galactose metabolism
Gohir.A08G094762	A08	57845098	57845347	250	GhZFPH4_DAP-vs-GhZFPH4_neg_peak_2935	4.30791	6.44539	2.56005	3.59E-07	0.00275391	Distal Intergenic	57868976	57869831	856	1	Gohir.A08G094762.1	-23629	IPR025742	Cleavage stimulation factor subunit 2, hinge domain	-	-	-	-	-	-
Gohir.A08G094901	A08	66235367	66235503	137	GhZFPH4_DAP-vs-GhZFPH4_neg_peak_2958	4.30791	6.44539	2.56005	3.59E-07	0.00275391	Distal Intergenic	66114361	66116569	2209	1	Gohir.A08G094901.1	121006	-	-	-	-	-	-	-	-
Gohir.A08G095062	A08	57992376	57992500	125	GhZFPH4_DAP-vs-GhZFPH4_neg_peak_2936	4.30791	6.44539	2.56005	3.59E-07	0.00275391	Distal Intergenic	58031112	58040219	9108	1	Gohir.A08G095062.1	-38612	-	-	-	-	-	-	-	-
Gohir.A08G095100	A08	58334650	58334883	234	GhZFPH4_DAP-vs-GhZFPH4_neg_peak_2937	4.30791	6.44539	2.56005	3.59E-07	0.00275391	Distal Intergenic	58118451	58121490	3040	1	Gohir.A08G095100.1	216199	IPR012870	Protein of unknown function DUF1666	-	-	-	-	-	-
Gohir.A08G095300	A08	58874078	58874346	269	GhZFPH4_DAP-vs-GhZFPH4_neg_peak_2941	4.30791	6.44539	2.56005	3.59E-07	0.00275391	Distal Intergenic	58714980	58718368	3389	2	Gohir.A08G095300.1	-155710	IPR003316,IPR015633,IPR036388,IPR036390	E2F/DP family, winged-helix DNA-binding domain|E2F Family|Winged helix-like DNA-binding domain superfamily|Winged helix DNA-binding domain superfamily	-	-	GO:0003700,GO:0005667,GO:0006355	DNA-binding transcription factor activity|transcription factor complex|regulation of transcription, DNA-templated	-	-
Gohir.A08G095500	A08	74317125	74317277	153	GhZFPH4_DAP-vs-GhZFPH4_neg_peak_2981	4.30791	6.44539	2.56005	3.59E-07	0.00275391	Distal Intergenic	75004020	75006232	2213	1	Gohir.A08G095500.1	-686743	IPR008183,IPR011013,IPR014718,IPR025532	Aldose 1-/Glucose-6-phosphate 1-epimerase|Galactose mutarotase-like domain superfamily|Glycoside hydrolase-type carbohydrate-binding|Glucose-6-phosphate 1-epimerase	K01792	glucose-6-phosphate 1-epimerase [EC:5.1.3.15]	GO:0003824,GO:0005975,GO:0016853,GO:0030246	catalytic activity|carbohydrate metabolic process|isomerase activity|carbohydrate binding	ko00010	Glycolysis / Gluconeogenesis
Gohir.A08G100200	A08	64334886	64335030	145	GhZFPH4_DAP-vs-GhZFPH4_neg_peak_2954	4.30791	6.44539	2.56005	3.59E-07	0.00275391	Distal Intergenic	64285054	64285924	871	1	Gohir.A08G100200.1	49832	-	-	-	-	-	-	-	-
Gohir.A08G101725	A08	71254559	71254735	177	GhZFPH4_DAP-vs-GhZFPH4_neg_peak_2973	4.30791	6.44539	2.56005	3.59E-07	0.00275391	Distal Intergenic	71166459	71170864	4406	2	Gohir.A08G101725.3	-83695	IPR000195,IPR035969	Rab-GTPase-TBC domain|Rab-GTPase-TBC domain superfamily	-	-	-	-	-	-
Gohir.A08G102425	A08	69493771	69493921	151	GhZFPH4_DAP-vs-GhZFPH4_neg_peak_2968	4.30791	6.44539	2.56005	3.59E-07	0.00275391	Distal Intergenic	69417923	69420558	2636	2	Gohir.A08G102425.1	-73213	-	-	-	-	-	-	-	-
Gohir.A08G106900	A08	87303722	87303846	125	GhZFPH4_DAP-vs-GhZFPH4_neg_peak_3016	4.30791	6.44539	2.56005	3.59E-07	0.00275391	Distal Intergenic	87257944	87260897	2954	1	Gohir.A08G106900.5	45778	-	-	-	-	-	-	-	-
Gohir.A08G110701	A08	76583589	76583769	181	GhZFPH4_DAP-vs-GhZFPH4_neg_peak_2991	4.30791	6.44539	2.56005	3.59E-07	0.00275391	Promoter (2-3kb)	76586312	76586699	388	2	Gohir.A08G110701.1	2930	IPR004808,IPR036691	AP endonuclease 1|Endonuclease/exonuclease/phosphatase superfamily	-	-	GO:0004518,GO:0006281	nuclease activity|DNA repair	-	-
Gohir.A08G114400	A08	90859825	90860323	499	GhZFPH4_DAP-vs-GhZFPH4_neg_peak_3027	4.30791	6.44539	2.56005	3.59E-07	0.00275391	Promoter (<=1kb)	90859357	90860901	1545	1	Gohir.A08G114400.1	468	IPR003526,IPR036571	2-C-methyl-D-erythritol 2,4-cyclodiphosphate synthase|2-C-methyl-D-erythritol 2,4-cyclodiphosphate synthase superfamily	K01770	2-C-methyl-D-erythritol 2,4-cyclodiphosphate synthase [EC:4.6.1.12]	GO:0008685,GO:0016114	2-C-methyl-D-erythritol 2,4-cyclodiphosphate synthase activity|terpenoid biosynthetic process	ko00900	Terpenoid backbone biosynthesis
Gohir.A08G123400	A08	98996814	98996978	165	GhZFPH4_DAP-vs-GhZFPH4_neg_peak_3049	4.30791	6.44539	2.56005	3.59E-07	0.00275391	Distal Intergenic	99291364	99294809	3446	2	Gohir.A08G123400.1	297831	IPR000095,IPR000198,IPR008936,IPR036936	CRIB domain|Rho GTPase-activating protein domain|Rho GTPase activation protein|CRIB domain superfamily	-	-	GO:0007165	signal transduction	-	-
Gohir.A08G125401	A08	101953471	101953706	236	GhZFPH4_DAP-vs-GhZFPH4_neg_peak_3057	4.30791	6.44539	2.56005	3.59E-07	0.00275391	Distal Intergenic	101966331	101970282	3952	1	Gohir.A08G125401.2	-12625	IPR007533,IPR023471	Cytochrome c oxidase assembly protein CtaG/Cox11|Cytochrome c oxidase assembly protein CtaG/Cox11, domain superfamily	-	-	GO:0005507	copper ion binding	-	-
Gohir.A08G137300	A08	105689054	105689174	121	GhZFPH4_DAP-vs-GhZFPH4_neg_peak_3068	4.30791	6.44539	2.56005	3.59E-07	0.00275391	Downstream (1-2kb)	105690611	105692725	2115	2	Gohir.A08G137300.7	3551	IPR012389,IPR013922,IPR036915	Cyclin P/U|Cyclin PHO80-like|Cyclin-like superfamily	-	-	GO:0000079,GO:0019901	regulation of cyclin-dependent protein serine/threonine kinase activity|protein kinase binding	-	-
Gohir.A08G137866	A08	106216606	106216752	147	GhZFPH4_DAP-vs-GhZFPH4_neg_peak_3073	4.30791	6.44539	2.56005	3.59E-07	0.00275391	Distal Intergenic	106182284	106185726	3443	2	Gohir.A08G137866.1	-30880	IPR007134,IPR007135,IPR019461	Autophagy-related protein 3, N-terminal|Autophagy-related protein 3|Autophagy-related protein 3, C-terminal	K08343	ubiquitin-like-conjugating enzyme ATG3	-	-	ko01522,ko04136,ko04138,ko04140,ko05167	Endocrine resistance|Autophagy - other|Autophagy - yeast|Autophagy - animal|Kaposi sarcoma-associated herpesvirus infection
Gohir.A08G167100	A08	114226065	114226221	157	GhZFPH4_DAP-vs-GhZFPH4_neg_peak_3097	4.30791	6.44539	2.56005	3.59E-07	0.00275391	Distal Intergenic	114208303	114209280	978	1	Gohir.A08G167100.1	17762	IPR001471,IPR016177,IPR036955	AP2/ERF domain|DNA-binding domain superfamily|AP2/ERF domain superfamily	K09286	EREBP-like factor	GO:0003677,GO:0003700,GO:0006355	DNA binding|DNA-binding transcription factor activity|regulation of transcription, DNA-templated	ko01522	Endocrine resistance
Gohir.A08G173600	A08	116358296	116358446	151	GhZFPH4_DAP-vs-GhZFPH4_neg_peak_3101	4.30791	6.44539	2.56005	3.59E-07	0.00275391	Distal Intergenic	116348076	116349057	982	1	Gohir.A08G173600.2	10220	IPR042316	IRK-interacting protein-like	-	-	-	-	-	-
Gohir.A09G000950	A09	315012	315223	212	GhZFPH4_DAP-vs-GhZFPH4_neg_peak_3147	4.30791	6.44539	2.56005	3.59E-07	0.00275391	Distal Intergenic	320293	320674	382	1	Gohir.A09G000950.1	-5070	-	-	-	-	-	-	-	-
Gohir.A09G009700	A09	2555105	2555236	132	GhZFPH4_DAP-vs-GhZFPH4_neg_peak_3156	4.30791	6.44539	2.56005	3.59E-07	0.00275391	Distal Intergenic	2540715	2543825	3111	1	Gohir.A09G009700.1	14390	IPR004140,IPR016159	Exocyst complex component Exo70|Cullin repeat-like-containing domain superfamily	K07195	exocyst complex component 7	GO:0000145,GO:0006887	exocyst|exocytosis	ko01522,ko04910,ko05132	Endocrine resistance|Insulin signaling pathway|Salmonella infection
Gohir.A09G012000	A09	2846962	2847342	381	GhZFPH4_DAP-vs-GhZFPH4_neg_peak_3157	4.30791	6.44539	2.56005	3.59E-07	0.00275391	Distal Intergenic	2827028	2832992	5965	1	Gohir.A09G012000.2	19934	IPR000595,IPR005821,IPR014710,IPR018490	Cyclic nucleotide-binding domain|Ion transport domain|RmlC-like jelly roll fold|Cyclic nucleotide-binding-like	K05391	cyclic nucleotide gated channel, plant	GO:0005216,GO:0006811,GO:0016020,GO:0055085	ion channel activity|ion transport|membrane|transmembrane transport	ko01522,ko04626	Endocrine resistance|Plant-pathogen interaction
Gohir.A09G031200	A09	12119948	12120092	145	GhZFPH4_DAP-vs-GhZFPH4_neg_peak_3190	4.30791	6.44539	2.56005	3.59E-07	0.00275391	Distal Intergenic	12019278	12020992	1715	2	Gohir.A09G031200.1	-98956	IPR002022,IPR011050,IPR012334,IPR018082	Pectate lyase|Pectin lyase fold/virulence factor|Pectin lyase fold|AmbAllergen	K01728	pectate lyase [EC:4.2.2.2]	-	-	ko00040,ko02024	Pentose and glucuronate interconversions|Quorum sensing
Gohir.A09G033100	A09	14657105	14657289	185	GhZFPH4_DAP-vs-GhZFPH4_neg_peak_3232	4.30791	6.44539	2.56005	3.59E-07	0.00275391	Distal Intergenic	14663933	14666460	2528	2	Gohir.A09G033100.1	9171	IPR001087,IPR036514	GDSL lipase/esterase|SGNH hydrolase superfamily	-	-	GO:0016788	hydrolase activity, acting on ester bonds	-	-
Gohir.A09G035100	A09	16159411	16159790	380	GhZFPH4_DAP-vs-GhZFPH4_neg_peak_3236	4.30791	6.44539	2.56005	3.59E-07	0.00275391	Distal Intergenic	16271118	16275912	4795	1	Gohir.A09G035100.1	-111328	IPR000764,IPR006083,IPR027417,IPR029057	Uridine kinase-like|Phosphoribulokinase/uridine kinase|P-loop containing nucleoside triphosphate hydrolase|Phosphoribosyltransferase-like	K00876	uridine kinase [EC:2.7.1.48]	GO:0005524,GO:0016301	ATP binding|kinase activity	ko00240,ko00983	Pyrimidine metabolism|Drug metabolism - other enzymes
Gohir.A09G038900	A09	29201842	29201979	138	GhZFPH4_DAP-vs-GhZFPH4_neg_peak_3305	4.30791	6.44539	2.56005	3.59E-07	0.00275391	Distal Intergenic	29317013	29317802	790	1	Gohir.A09G038900.1	-115034	IPR018392	LysM domain	-	-	-	-	-	-
Gohir.A09G039800	A09	27133894	27134061	168	GhZFPH4_DAP-vs-GhZFPH4_neg_peak_3300	4.30791	6.44539	2.56005	3.59E-07	0.00275391	Distal Intergenic	27656221	27657801	1581	2	Gohir.A09G039800.1	523740	IPR002528	Multi antimicrobial extrusion protein	-	-	GO:0015297,GO:0016020,GO:0042910,GO:0055085	antiporter activity|membrane|xenobiotic transmembrane transporter activity|transmembrane transport	ko01522	Endocrine resistance
Gohir.A09G040600	A09	34785643	34786004	362	GhZFPH4_DAP-vs-GhZFPH4_neg_peak_3327	4.30791	6.44539	2.56005	3.59E-07	0.00275391	Distal Intergenic	34800898	34802860	1963	1	Gohir.A09G040600.1	-14894	IPR005326,IPR036388,IPR037447	Plectin/S10, N-terminal|Winged helix-like DNA-binding domain superfamily|40S Ribosomal protein S10	K02947	small subunit ribosomal protein S10e	-	-	ko01522,ko03010	Endocrine resistance|Ribosome
Gohir.A09G051100	A09	46951188	46951409	222	GhZFPH4_DAP-vs-GhZFPH4_neg_peak_3394	4.30791	6.44539	2.56005	3.59E-07	0.00275391	Distal Intergenic	46941657	46946664	5008	2	Gohir.A09G051100.9	-4524	IPR000719,IPR011009	Protein kinase domain|Protein kinase-like domain superfamily	K02202	cyclin-dependent kinase 7 [EC:2.7.11.22 2.7.11.23]	GO:0004672,GO:0005524,GO:0006468	protein kinase activity|ATP binding|protein phosphorylation	ko01522,ko03022,ko03420,ko04110	Endocrine resistance|Basal transcription factors|Nucleotide excision repair|Cell cycle
Gohir.A09G051400	A09	21444817	21445112	296	GhZFPH4_DAP-vs-GhZFPH4_neg_peak_3255	4.30791	6.44539	2.56005	3.59E-07	0.00275391	Distal Intergenic	21525629	21529310	3682	1	Gohir.A09G051400.1	-80517	IPR001005,IPR006447,IPR009057,IPR017930	SANT/Myb domain|Myb domain, plants|Homeobox-like domain superfamily|Myb domain	-	-	GO:0003677	DNA binding	-	-
Gohir.A09G052000	A09	19195772	19195962	191	GhZFPH4_DAP-vs-GhZFPH4_neg_peak_3247	4.30791	6.44539	2.56005	3.59E-07	0.00275391	Distal Intergenic	18808528	18810457	1930	1	Gohir.A09G052000.1	387244	IPR005123,IPR026992,IPR027443	Oxoglutarate/iron-dependent dioxygenase|Non-haem dioxygenase N-terminal domain|Isopenicillin N synthase-like	K05282	gibberellin-44 dioxygenase [EC:1.14.11.12]	GO:0016491,GO:0055114	oxidoreductase activity|oxidation-reduction process	ko00904	Diterpenoid biosynthesis
Gohir.A09G052000	A09	19351629	19351854	226	GhZFPH4_DAP-vs-GhZFPH4_neg_peak_3248	4.30791	6.44539	2.56005	3.59E-07	0.00275391	Distal Intergenic	18808528	18810457	1930	1	Gohir.A09G052000.1	543101	IPR005123,IPR026992,IPR027443	Oxoglutarate/iron-dependent dioxygenase|Non-haem dioxygenase N-terminal domain|Isopenicillin N synthase-like	K05282	gibberellin-44 dioxygenase [EC:1.14.11.12]	GO:0016491,GO:0055114	oxidoreductase activity|oxidation-reduction process	ko00904	Diterpenoid biosynthesis
Gohir.A09G054800	A09	51034997	51035243	247	GhZFPH4_DAP-vs-GhZFPH4_neg_peak_3411	4.30791	6.44539	2.56005	3.59E-07	0.00275391	Promoter (<=1kb)	51033507	51035246	1740	2	Gohir.A09G054800.1	3	IPR013783	Immunoglobulin-like fold	-	-	-	-	-	-
Gohir.A09G087900	A09	63584527	63584694	168	GhZFPH4_DAP-vs-GhZFPH4_neg_peak_3451	4.30791	6.44539	2.56005	3.59E-07	0.00275391	Distal Intergenic	63593149	63599683	6535	1	Gohir.A09G087900.2	-8455	IPR011011,IPR013083,IPR016181,IPR019787,IPR032308,IPR036427	Zinc finger, FYVE/PHD-type|Zinc finger, RING/FYVE/PHD-type|Acyl-CoA N-acyltransferase|Zinc finger, PHD-finger|Jas TPL-binding domain|Bromodomain-like superfamily	-	-	GO:0005515	protein binding	-	-
Gohir.A09G120200	A09	70315432	70315752	321	GhZFPH4_DAP-vs-GhZFPH4_neg_peak_3534	4.30791	6.44539	2.56005	3.59E-07	0.00275391	Distal Intergenic	70321155	70322742	1588	2	Gohir.A09G120200.1	6990	IPR000490,IPR017853	Glycoside hydrolase family 17|Glycoside hydrolase superfamily	-	-	GO:0004553,GO:0005975	hydrolase activity, hydrolyzing O-glycosyl compounds|carbohydrate metabolic process	-	-
Gohir.A09G143200	A09	74116972	74117166	195	GhZFPH4_DAP-vs-GhZFPH4_neg_peak_3550	4.30791	6.44539	2.56005	3.59E-07	0.00275391	Promoter (2-3kb)	74114916	74117655	2740	1	Gohir.A09G143200.2	2056	IPR006734	Protein of unknown function DUF597	-	-	-	-	-	-
Gohir.A09G147700	A09	74985321	74985694	374	GhZFPH4_DAP-vs-GhZFPH4_neg_peak_3551	4.30791	6.44539	2.56005	3.59E-07	0.00275391	Distal Intergenic	74976179	74980951	4773	1	Gohir.A09G147700.1	9142	IPR003338,IPR003959,IPR004201,IPR005938,IPR009010,IPR027417,IPR029067,IPR041569	CDC48, N-terminal subdomain|ATPase, AAA-type, core|CDC48, domain 2|AAA ATPase, CDC48 family|Aspartate decarboxylase-like domain superfamily|P-loop containing nucleoside triphosphate hydrolase|CDC48 domain 2-like superfamily|AAA ATPase, AAA+ lid domain	K13525	transitional endoplasmic reticulum ATPase	GO:0005524,GO:0016787	ATP binding|hydrolase activity	ko01522,ko04141,ko05134	Endocrine resistance|Protein processing in endoplasmic reticulum|Legionellosis
Gohir.A09G191700	A09	79569259	79569374	116	GhZFPH4_DAP-vs-GhZFPH4_neg_peak_3561	4.30791	6.44539	2.56005	3.59E-07	0.00275391	Promoter (<=1kb)	79567336	79570096	2761	2	Gohir.A09G191700.1	722	IPR000210,IPR011333,IPR038920	BTB/POZ domain|SKP1/BTB/POZ domain superfamily|BTB/POZ domain-containing protein	-	-	GO:0005515	protein binding	-	-
Gohir.A09G194600	A09	79891081	79891251	171	GhZFPH4_DAP-vs-GhZFPH4_neg_peak_3563	4.30791	6.44539	2.56005	3.59E-07	0.00275391	Promoter (<=1kb)	79890355	79892790	2436	1	Gohir.A09G194600.2	726	IPR002912,IPR040217	ACT domain|ACT domain-containing protein ACR1-12	-	-	-	-	-	-
Gohir.A09G199800	A09	80498610	80498800	191	GhZFPH4_DAP-vs-GhZFPH4_neg_peak_3565	4.30791	6.44539	2.56005	3.59E-07	0.00275391	Promoter (<=1kb)	80496347	80498949	2603	2	Gohir.A09G199800.1	149	IPR000727,IPR006011,IPR010989	Target SNARE coiled-coil homology domain|Syntaxin, N-terminal domain|SNARE	K08488	syntaxin 7	GO:0016020,GO:0016192	membrane|vesicle-mediated transport	ko01522,ko04130,ko04145	Endocrine resistance|SNARE interactions in vesicular transport|Phagosome
Gohir.A09G227600	A09	83486555	83486852	298	GhZFPH4_DAP-vs-GhZFPH4_neg_peak_3572	4.30791	6.44539	2.56005	3.59E-07	0.00275391	Exon (Gohir.A09G227600.1/Gohir.A09G227600, exon 13 of 18)	83484938	83490512	5575	2	Gohir.A09G227600.1	3660	IPR001680,IPR003613,IPR013083,IPR013915,IPR015943,IPR017986,IPR036322,IPR038959	WD40 repeat|U box domain|Zinc finger, RING/FYVE/PHD-type|Pre-mRNA-splicing factor 19|WD40/YVTN repeat-like-containing domain superfamily|WD40-repeat-containing domain|WD40-repeat-containing domain superfamily|Pre-mRNA-processing factor 19	K10599	pre-mRNA-processing factor 19 [EC:2.3.2.27]	GO:0000398,GO:0000974,GO:0004842,GO:0005515,GO:0006281,GO:0016567,GO:0061630	mRNA splicing, via spliceosome|Prp19 complex|ubiquitin-protein transferase activity|protein binding|DNA repair|protein ubiquitination|ubiquitin protein ligase activity	ko01522,ko03040,ko04120	Endocrine resistance|Spliceosome|Ubiquitin mediated proteolysis
Gohir.A10G063300	A10	7565310	7565447	138	GhZFPH4_DAP-vs-GhZFPH4_neg_peak_3599	4.30791	6.44539	2.56005	3.59E-07	0.00275391	Promoter (<=1kb)	7564415	7567375	2961	1	Gohir.A10G063300.4	895	IPR000878,IPR006366,IPR014776,IPR014777,IPR035996	Tetrapyrrole methylase|Uroporphyrin-III C-methyltransferase|Tetrapyrrole methylase, subdomain 2|Tetrapyrrole methylase, subdomain 1|Tetrapyrrole methylase superfamily	K02303	uroporphyrin-III C-methyltransferase [EC:2.1.1.107]	GO:0008168,GO:0019354	methyltransferase activity|siroheme biosynthetic process	ko00860	Porphyrin and chlorophyll metabolism
Gohir.A10G073900	A10	11758444	11758727	284	GhZFPH4_DAP-vs-GhZFPH4_neg_peak_3611	4.30791	6.44539	2.56005	3.59E-07	0.00275391	Distal Intergenic	11745586	11747319	1734	2	Gohir.A10G073900.1	-11125	-	-	-	-	-	-	-	-
Gohir.A10G083514	A10	14296550	14296740	191	GhZFPH4_DAP-vs-GhZFPH4_neg_peak_3619	4.30791	6.44539	2.56005	3.59E-07	0.00275391	Distal Intergenic	14361521	14362715	1195	1	Gohir.A10G083514.1	-64781	IPR000225,IPR003613,IPR011989,IPR013083,IPR016024	Armadillo|U box domain|Armadillo-like helical|Zinc finger, RING/FYVE/PHD-type|Armadillo-type fold	-	-	GO:0004842,GO:0005515,GO:0016567	ubiquitin-protein transferase activity|protein binding|protein ubiquitination	-	-
Gohir.A10G083732	A10	13502784	13502932	149	GhZFPH4_DAP-vs-GhZFPH4_neg_peak_3616	4.30791	6.44539	2.56005	3.59E-07	0.00275391	Distal Intergenic	13487841	13491905	4065	2	Gohir.A10G083732.3	-10879	IPR006845	Pex, N-terminal	-	-	-	-	-	-
Gohir.A10G088200	A10	17185342	17185509	168	GhZFPH4_DAP-vs-GhZFPH4_neg_peak_3632	4.30791	6.44539	2.56005	3.59E-07	0.00275391	Promoter (2-3kb)	17182666	17186244	3579	1	Gohir.A10G088200.1	2676	IPR001471,IPR016177,IPR036955	AP2/ERF domain|DNA-binding domain superfamily|AP2/ERF domain superfamily	K09285	AP2-like factor, ANT lineage	GO:0003677,GO:0003700,GO:0006355	DNA binding|DNA-binding transcription factor activity|regulation of transcription, DNA-templated	ko01522	Endocrine resistance
Gohir.A10G092200	A10	18225080	18225239	160	GhZFPH4_DAP-vs-GhZFPH4_neg_peak_3637	4.30791	6.44539	2.56005	3.59E-07	0.00275391	Distal Intergenic	18217193	18219213	2021	2	Gohir.A10G092200.2	-5867	IPR003175	Cyclin-dependent kinase inhibitor	-	-	GO:0004861,GO:0005634,GO:0007050	cyclin-dependent protein serine/threonine kinase inhibitor activity|nucleus|cell cycle arrest	-	-
Gohir.A10G094000	A10	18894387	18894539	153	GhZFPH4_DAP-vs-GhZFPH4_neg_peak_3639	4.30791	6.44539	2.56005	3.59E-07	0.00275391	Distal Intergenic	18890985	18893067	2083	1	Gohir.A10G094000.1	3402	IPR006702	Casparian strip membrane protein domain	-	-	-	-	-	-
Gohir.A10G096000	A10	19558292	19558425	134	GhZFPH4_DAP-vs-GhZFPH4_neg_peak_3642	4.30791	6.44539	2.56005	3.59E-07	0.00275391	Promoter (2-3kb)	19561074	19564738	3665	1	Gohir.A10G096000.1	-2649	-	-	-	-	-	-	-	-
Gohir.A10G104500	A10	23642532	23642732	201	GhZFPH4_DAP-vs-GhZFPH4_neg_peak_3661	4.30791	6.44539	2.56005	3.59E-07	0.00275391	Distal Intergenic	23632837	23633808	972	1	Gohir.A10G104500.1	9695	-	-	-	-	-	-	-	-
Gohir.A10G106200	A10	24843835	24843952	118	GhZFPH4_DAP-vs-GhZFPH4_neg_peak_3665	4.30791	6.44539	2.56005	3.59E-07	0.00275391	Distal Intergenic	24805948	24808681	2734	2	Gohir.A10G106200.1	-35154	IPR006214	Bax inhibitor 1-related	-	-	-	-	ko01522	Endocrine resistance
Gohir.A10G110100	A10	29435476	29435582	107	GhZFPH4_DAP-vs-GhZFPH4_neg_peak_3684	4.30791	6.44539	2.56005	3.59E-07	0.00275391	Distal Intergenic	29477587	29479773	2187	2	Gohir.A10G110100.1	44191	IPR008942,IPR013809	ENTH/VHS|ENTH domain	K12471	epsin	-	-	ko01522,ko04144	Endocrine resistance|Endocytosis
Gohir.A10G112800	A10	35213895	35214309	415	GhZFPH4_DAP-vs-GhZFPH4_neg_peak_3702	4.30791	6.44539	2.56005	3.59E-07	0.00275391	Distal Intergenic	35224196	35226998	2803	1	Gohir.A10G112800.2	-9887	IPR011598,IPR036638	Myc-type, basic helix-loop-helix (bHLH) domain|Helix-loop-helix DNA-binding domain superfamily	-	-	GO:0046983	protein dimerization activity	-	-
Gohir.A10G115401	A10	51159653	51159849	197	GhZFPH4_DAP-vs-GhZFPH4_neg_peak_3752	4.30791	6.44539	2.56005	3.59E-07	0.00275391	Distal Intergenic	51012655	51013399	745	1	Gohir.A10G115401.1	146998	-	-	-	-	-	-	-	-
Gohir.A10G124100	A10	45561800	45561991	192	GhZFPH4_DAP-vs-GhZFPH4_neg_peak_3736	4.30791	6.44539	2.56005	3.59E-07	0.00275391	Distal Intergenic	45945576	45947621	2046	1	Gohir.A10G124100.1	-383585	IPR017395,IPR029058	Chlorophyllase|Alpha/Beta hydrolase fold	K08099	chlorophyllase [EC:3.1.1.14]	GO:0015996,GO:0047746	chlorophyll catabolic process|chlorophyllase activity	ko00860	Porphyrin and chlorophyll metabolism
Gohir.A10G125500	A10	70280031	70280329	299	GhZFPH4_DAP-vs-GhZFPH4_neg_peak_3823	4.30791	6.44539	2.56005	3.59E-07	0.00275391	Distal Intergenic	70248399	70257481	9083	1	Gohir.A10G125500.2	31632	-	-	-	-	-	-	-	-
Gohir.A10G132465	A10	75260300	75260428	129	GhZFPH4_DAP-vs-GhZFPH4_neg_peak_3847	4.30791	6.44539	2.56005	3.59E-07	0.00275391	Distal Intergenic	75282334	75283055	722	2	Gohir.A10G132465.1	22627	-	-	-	-	-	-	-	-
Gohir.A10G138300	A10	78650599	78650732	134	GhZFPH4_DAP-vs-GhZFPH4_neg_peak_3855	4.30791	6.44539	2.56005	3.59E-07	0.00275391	Distal Intergenic	78678645	78680605	1961	1	Gohir.A10G138300.2	-27913	IPR004330	FAR1 DNA binding domain	-	-	-	-	-	-
Gohir.A10G139400	A10	79106452	79106698	247	GhZFPH4_DAP-vs-GhZFPH4_neg_peak_3859	4.30791	6.44539	2.56005	3.59E-07	0.00275391	Distal Intergenic	78994598	78994903	306	1	Gohir.A10G139400.1	111854	IPR016140,IPR036312,IPR039265	Bifunctional inhibitor/plant lipid transfer protein/seed storage helical domain|Bifunctional inhibitor/plant lipid transfer protein/seed storage helical domain superfamily|Putative lipid-transfer protein DIR1-like	-	-	GO:0005504,GO:0009627	fatty acid binding|systemic acquired resistance	-	-
Gohir.A10G139700	A10	79700726	79700909	184	GhZFPH4_DAP-vs-GhZFPH4_neg_peak_3863	4.30791	6.44539	2.56005	3.59E-07	0.00275391	Distal Intergenic	79829997	79831427	1431	1	Gohir.A10G139700.1	-129088	IPR005202	Transcription factor GRAS	-	-	-	-	-	-
Gohir.A10G141600	A10	80700547	80700761	215	GhZFPH4_DAP-vs-GhZFPH4_neg_peak_3868	4.30791	6.44539	2.56005	3.59E-07	0.00275391	Distal Intergenic	80723568	80727120	3553	2	Gohir.A10G141600.2	26359	IPR001611,IPR013101,IPR032675	Leucine-rich repeat|Leucine-rich repeat 2|Leucine-rich repeat domain superfamily	-	-	GO:0005515	protein binding	-	-
Gohir.A10G146500	A10	83002286	83002439	154	GhZFPH4_DAP-vs-GhZFPH4_neg_peak_3873	4.30791	6.44539	2.56005	3.59E-07	0.00275391	Distal Intergenic	83119442	83120933	1492	1	Gohir.A10G146500.1	-117003	IPR036188	FAD/NAD(P)-binding domain superfamily	K11816	indole-3-pyruvate monooxygenase [EC:1.14.13.168]	-	-	ko00380	Tryptophan metabolism
Gohir.A10G146900	A10	83229566	83229774	209	GhZFPH4_DAP-vs-GhZFPH4_neg_peak_3875	4.30791	6.44539	2.56005	3.59E-07	0.00275391	Exon (Gohir.A10G146900.1/Gohir.A10G146900, exon 11 of 12)	83228506	83238568	10063	2	Gohir.A10G146900.1	8794	IPR000719,IPR001245,IPR002110,IPR011009,IPR020683,IPR036770	Protein kinase domain|Serine-threonine/tyrosine-protein kinase, catalytic domain|Ankyrin repeat|Protein kinase-like domain superfamily|Ankyrin repeat-containing domain|Ankyrin repeat-containing domain superfamily	-	-	GO:0004672,GO:0005515,GO:0005524,GO:0006468	protein kinase activity|protein binding|ATP binding|protein phosphorylation	-	-
Gohir.A10G147100	A10	83742094	83742369	276	GhZFPH4_DAP-vs-GhZFPH4_neg_peak_3878	4.30791	6.44539	2.56005	3.59E-07	0.00275391	Distal Intergenic	83749167	83750019	853	2	Gohir.A10G147100.1	7650	-	-	-	-	-	-	-	-
Gohir.A10G155700	A10	90496575	90496692	118	GhZFPH4_DAP-vs-GhZFPH4_neg_peak_3897	4.30791	6.44539	2.56005	3.59E-07	0.00275391	Distal Intergenic	90653069	90660410	7342	1	Gohir.A10G155700.2	-156377	IPR007305,IPR011691	Vesicle transport protein, Got1/SFT2-like|Vesicle transport protein SFT2	-	-	GO:0016021,GO:0016192	integral component of membrane|vesicle-mediated transport	-	-
Gohir.A10G156600	A10	92125565	92125671	107	GhZFPH4_DAP-vs-GhZFPH4_neg_peak_3903	4.30791	6.44539	2.56005	3.59E-07	0.00275391	Distal Intergenic	92129479	92131625	2147	2	Gohir.A10G156600.1	5954	IPR003613,IPR011989,IPR013083,IPR016024	U box domain|Armadillo-like helical|Zinc finger, RING/FYVE/PHD-type|Armadillo-type fold	-	-	GO:0004842,GO:0016567	ubiquitin-protein transferase activity|protein ubiquitination	-	-
Gohir.A10G157222	A10	92798921	92799106	186	GhZFPH4_DAP-vs-GhZFPH4_neg_peak_3905	4.30791	6.44539	2.56005	3.59E-07	0.00275391	Distal Intergenic	92760844	92762061	1218	2	Gohir.A10G157222.1	-36860	-	-	-	-	-	-	-	-
Gohir.A10G168600	A10	98932476	98932645	170	GhZFPH4_DAP-vs-GhZFPH4_neg_peak_3927	4.30791	6.44539	2.56005	3.59E-07	0.00275391	Distal Intergenic	98926634	98930029	3396	1	Gohir.A10G168600.16	5842	IPR006809,IPR009072	TAFII28-like protein|Histone-fold	K03135	transcription initiation factor TFIID subunit 11	GO:0005634,GO:0006367,GO:0046982	nucleus|transcription initiation from RNA polymerase II promoter|protein heterodimerization activity	ko01522,ko03022	Endocrine resistance|Basal transcription factors
Gohir.A10G170900	A10	100579519	100579792	274	GhZFPH4_DAP-vs-GhZFPH4_neg_peak_3928	4.30791	6.44539	2.56005	3.59E-07	0.00275391	Distal Intergenic	100567992	100568821	830	1	Gohir.A10G170900.1	11527	IPR002673	Ribosomal protein L29e	K02905	large subunit ribosomal protein L29e	GO:0003735,GO:0005840,GO:0006412	structural constituent of ribosome|ribosome|translation	ko01522,ko03010	Endocrine resistance|Ribosome
Gohir.A10G178700	A10	103097984	103098208	225	GhZFPH4_DAP-vs-GhZFPH4_neg_peak_3936	4.30791	6.44539	2.56005	3.59E-07	0.00275391	Distal Intergenic	103122876	103125424	2549	2	Gohir.A10G178700.1	27216	IPR001189,IPR019831,IPR019832,IPR036314,IPR036324	Manganese/iron superoxide dismutase|Manganese/iron superoxide dismutase, N-terminal|Manganese/iron superoxide dismutase, C-terminal|Manganese/iron superoxide dismutase, C-terminal domain superfamily|Manganese/iron superoxide dismutase, N-terminal domain superfamily	K04564	superoxide dismutase, Fe-Mn family [EC:1.15.1.1]	GO:0004784,GO:0006801,GO:0046872,GO:0055114	superoxide dismutase activity|superoxide metabolic process|metal ion binding|oxidation-reduction process	ko04013,ko04068,ko04146,ko04211,ko04212,ko04213	MAPK signaling pathway - fly|FoxO signaling pathway|Peroxisome|Longevity regulating pathway|Longevity regulating pathway - worm|Longevity regulating pathway - multiple species
Gohir.A10G182700	A10	104740092	104740388	297	GhZFPH4_DAP-vs-GhZFPH4_neg_peak_3941	4.30791	6.44539	2.56005	3.59E-07	0.00275391	Distal Intergenic	104756811	104761194	4384	2	Gohir.A10G182700.1	20806	IPR000719,IPR011009,IPR025287	Protein kinase domain|Protein kinase-like domain superfamily|Wall-associated receptor kinase, galacturonan-binding domain	-	-	GO:0004672,GO:0005524,GO:0006468,GO:0030247	protein kinase activity|ATP binding|protein phosphorylation|polysaccharide binding	-	-
Gohir.A10G183800	A10	105002488	105002666	179	GhZFPH4_DAP-vs-GhZFPH4_neg_peak_3943	4.30791	6.44539	2.56005	3.59E-07	0.00275391	Promoter (1-2kb)	105000615	105008008	7394	1	Gohir.A10G183800.3	1873	IPR001680,IPR015943,IPR017986,IPR020472,IPR036322	WD40 repeat|WD40/YVTN repeat-like-containing domain superfamily|WD40-repeat-containing domain|G-protein beta WD-40 repeat|WD40-repeat-containing domain superfamily	K15542	polyadenylation factor subunit 2	GO:0005515	protein binding	ko01522,ko03015	Endocrine resistance|mRNA surveillance pathway
Gohir.A10G200000	A10	109854404	109854570	167	GhZFPH4_DAP-vs-GhZFPH4_neg_peak_3960	4.30791	6.44539	2.56005	3.59E-07	0.00275391	Distal Intergenic	109862586	109863447	862	2	Gohir.A10G200000.1	8877	-	-	-	-	-	-	-	-
Gohir.A10G203600	A10	110721619	110721812	194	GhZFPH4_DAP-vs-GhZFPH4_neg_peak_3961	4.30791	6.44539	2.56005	3.59E-07	0.00275391	Distal Intergenic	110716496	110717142	647	2	Gohir.A10G203600.1	-4477	IPR012552	DVL	-	-	-	-	-	-
Gohir.A10G204100	A10	111008955	111009078	124	GhZFPH4_DAP-vs-GhZFPH4_neg_peak_3962	4.30791	6.44539	2.56005	3.59E-07	0.00275391	Promoter (2-3kb)	111011781	111015694	3914	1	Gohir.A10G204100.1	-2703	IPR001594	Palmitoyltransferase, DHHC domain	K20029	palmitoyltransferase ZDHHC3/7/25 [EC:2.3.1.225]	GO:0016409	palmitoyltransferase activity	ko01522	Endocrine resistance
Gohir.A11G028180	A11	2846724	2846931	208	GhZFPH4_DAP-vs-GhZFPH4_neg_peak_3987	4.30791	6.44539	2.56005	3.59E-07	0.00275391	Promoter (1-2kb)	2841054	2844901	3848	2	Gohir.A11G028180.1	-1823	IPR004843,IPR006186,IPR029052	Calcineurin-like phosphoesterase domain, ApaH type|Serine/threonine-specific protein phosphatase/bis(5-nucleosyl)-tetraphosphatase|Metallo-dependent phosphatase-like	K04382	serine/threonine-protein phosphatase 2A catalytic subunit [EC:3.1.3.16]	GO:0016787	hydrolase activity	ko01522,ko03015,ko04013,ko04071,ko04111,ko04113,ko04114,ko04136,ko04138,ko04140,ko04151,ko04152,ko04261,ko04350,ko04390,ko04391,ko04530,ko04728,ko04730,ko05160	Endocrine resistance|mRNA surveillance pathway|MAPK signaling pathway - fly|Sphingolipid signaling pathway|Cell cycle - yeast|Meiosis - yeast|Oocyte meiosis|Autophagy - other|Autophagy - yeast|Autophagy - animal|PI3K-Akt signaling pathway|AMPK signaling pathway|Adrenergic signaling in cardiomyocytes|TGF-beta signaling pathway|Hippo signaling pathway|Hippo signaling pathway - fly|Tight junction|Do…
Gohir.A11G030600	A11	2622265	2622687	423	GhZFPH4_DAP-vs-GhZFPH4_neg_peak_3986	4.30791	6.44539	2.56005	3.59E-07	0.00275391	Promoter (2-3kb)	2624955	2628737	3783	1	Gohir.A11G030600.1	-2268	IPR001164,IPR037278,IPR038508	Arf GTPase activating protein|ARFGAP/RecO-like zinc finger|ArfGAP domain superfamily	K12493	ADP-ribosylation factor GTPase-activating protein 2/3	GO:0005096	GTPase activator activity	ko01522,ko04144	Endocrine resistance|Endocytosis
Gohir.A11G121000	A11	13566441	13566640	200	GhZFPH4_DAP-vs-GhZFPH4_neg_peak_4015	4.30791	6.44539	2.56005	3.59E-07	0.00275391	Promoter (<=1kb)	13566253	13572972	6720	1	Gohir.A11G121000.7	188	IPR000313,IPR006569,IPR008942	PWWP domain|CID domain|ENTH/VHS	-	-	-	-	-	-
Gohir.A11G125300	A11	14325847	14326163	317	GhZFPH4_DAP-vs-GhZFPH4_neg_peak_4017	4.30791	6.44539	2.56005	3.59E-07	0.00275391	Distal Intergenic	14377587	14382012	4426	1	Gohir.A11G125300.1	-51424	IPR011333,IPR011990,IPR019734	SKP1/BTB/POZ domain superfamily|Tetratricopeptide-like helical domain superfamily|Tetratricopeptide repeat	-	-	GO:0005515	protein binding	-	-
Gohir.A11G131450	A11	15620454	15620703	250	GhZFPH4_DAP-vs-GhZFPH4_neg_peak_4022	4.30791	6.44539	2.56005	3.59E-07	0.00275391	Distal Intergenic	15638499	15640894	2396	1	Gohir.A11G131450.1	-17796	IPR000644,IPR001347,IPR004800	CBS domain|Sugar isomerase (SIS)|Phosphosugar isomerase, KdsD/KpsF-type	K06041	arabinose-5-phosphate isomerase [EC:5.3.1.13]	GO:0005975,GO:0016853,GO:0097367,GO:1901135	carbohydrate metabolic process|isomerase activity|carbohydrate derivative binding|carbohydrate derivative metabolic process	ko00540,ko01522	Lipopolysaccharide biosynthesis|Endocrine resistance
Gohir.A11G134000	A11	15891540	15891745	206	GhZFPH4_DAP-vs-GhZFPH4_neg_peak_4023	4.30791	6.44539	2.56005	3.59E-07	0.00275391	Distal Intergenic	15877867	15885829	7963	2	Gohir.A11G134000.1	-5711	IPR003439,IPR011527,IPR027417,IPR036640	ABC transporter-like|ABC transporter type 1, transmembrane domain|P-loop containing nucleoside triphosphate hydrolase|ABC transporter type 1, transmembrane domain superfamily	K05665	ATP-binding cassette, subfamily C (CFTR/MRP), member 1 [EC:7.6.2.3]	GO:0005524,GO:0016021,GO:0016887,GO:0042626,GO:0055085	ATP binding|integral component of membrane|ATPase activity|ATPase-coupled transmembrane transporter activity|transmembrane transport	ko01522,ko01523,ko02010,ko04071,ko04977	Endocrine resistance|Antifolate resistance|ABC transporters|Sphingolipid signaling pathway|Vitamin digestion and absorption
Gohir.A11G153950	A11	19975685	19975881	197	GhZFPH4_DAP-vs-GhZFPH4_neg_peak_4029	4.30791	6.44539	2.56005	3.59E-07	0.00275391	Distal Intergenic	19951593	19952454	862	1	Gohir.A11G153950.1	24092	-	-	-	-	-	-	-	-
Gohir.A11G186700	A11	28184223	28184361	139	GhZFPH4_DAP-vs-GhZFPH4_neg_peak_4060	4.30791	6.44539	2.56005	3.59E-07	0.00275391	Distal Intergenic	28145456	28147811	2356	2	Gohir.A11G186700.2	-36412	IPR000608,IPR016135	Ubiquitin-conjugating enzyme E2|Ubiquitin-conjugating enzyme/RWD-like	-	-	-	-	ko01522,ko04120	Endocrine resistance|Ubiquitin mediated proteolysis
Gohir.A11G194300	A11	33293035	33293225	191	GhZFPH4_DAP-vs-GhZFPH4_neg_peak_4070	4.30791	6.44539	2.56005	3.59E-07	0.00275391	3' UTR	33293109	33304192	11084	2	Gohir.A11G194300.1	10967	IPR001214,IPR025778,IPR026489,IPR041355	SET domain|Histone-lysine N-methyltransferase, EZ|CXC domain|Pre-SET CXC domain	-	-	GO:0005515,GO:0031519	protein binding|PcG protein complex	-	-
Gohir.A11G199666	A11	41718647	41718757	111	GhZFPH4_DAP-vs-GhZFPH4_neg_peak_4096	4.30791	6.44539	2.56005	3.59E-07	0.00275391	Distal Intergenic	41723763	41724253	491	1	Gohir.A11G199666.1	-5006	IPR001750,IPR003918	NADH:quinone oxidoreductase/Mrp antiporter, membrane subunit|NADH:ubiquinone oxidoreductase	-	-	GO:0008137,GO:0042773,GO:0055114	NADH dehydrogenase (ubiquinone) activity|ATP synthesis coupled electron transport|oxidation-reduction process	-	-
Gohir.A11G200200	A11	45162759	45162894	136	GhZFPH4_DAP-vs-GhZFPH4_neg_peak_4110	4.30791	6.44539	2.56005	3.59E-07	0.00275391	Distal Intergenic	44680643	44681705	1063	2	Gohir.A11G200200.1	-481054	IPR001024,IPR010417,IPR036392,IPR037060	PLAT/LH2 domain|Embryo-specific ATS3|PLAT/LH2 domain superfamily|Catalase core domain superfamily	-	-	GO:0004096,GO:0005515,GO:0020037,GO:0055114	catalase activity|protein binding|heme binding|oxidation-reduction process	-	-
Gohir.A11G211100	A11	60587421	60587549	129	GhZFPH4_DAP-vs-GhZFPH4_neg_peak_4159	4.30791	6.44539	2.56005	3.59E-07	0.00275391	Distal Intergenic	60628248	60635492	7245	1	Gohir.A11G211100.1	-40699	IPR040418	Protein crowded nuclei	-	-	GO:0005634,GO:0006997	nucleus|nucleus organization	-	-
Gohir.A11G211500	A11	60823803	60823985	183	GhZFPH4_DAP-vs-GhZFPH4_neg_peak_4161	4.30791	6.44539	2.56005	3.59E-07	0.00275391	Downstream (1-2kb)	60825623	60829878	4256	2	Gohir.A11G211500.1	5893	IPR029063	S-adenosyl-L-methionine-dependent methyltransferase	K23871	putative pectin methylesterase [EC:2.1.1.-]	-	-	ko01522	Endocrine resistance
Gohir.A11G225600	A11	87754922	87755130	209	GhZFPH4_DAP-vs-GhZFPH4_neg_peak_4251	4.30791	6.44539	2.56005	3.59E-07	0.00275391	Distal Intergenic	87778566	87781654	3089	2	Gohir.A11G225600.1	26524	IPR010658,IPR036259	Nodulin-like|MFS transporter superfamily	-	-	-	-	-	-
Gohir.A11G227100	A11	91177162	91177307	146	GhZFPH4_DAP-vs-GhZFPH4_neg_peak_4266	4.30791	6.44539	2.56005	3.59E-07	0.00275391	Distal Intergenic	91112079	91116942	4864	2	Gohir.A11G227100.1	-60220	IPR001433,IPR001709,IPR001834,IPR008333,IPR017927,IPR017938,IPR039261	Oxidoreductase FAD/NAD(P)-binding|Flavoprotein pyridine nucleotide cytochrome reductase|NADH:cytochrome b5 reductase-like|Flavoprotein pyridine nucleotide cytochrome reductase-like, FAD-binding domain|FAD-binding domain, ferredoxin reductase-type|Riboflavin synthase-like beta-barrel|Ferredoxin-NADP reductase (FNR), nucleotide-binding domain	K00326	cytochrome-b5 reductase [EC:1.6.2.2]	GO:0016491,GO:0055114	oxidoreductase activity|oxidation-reduction process	ko00520	Amino sugar and nucleotide sugar metabolism
Gohir.A11G228600	A11	82100838	82100988	151	GhZFPH4_DAP-vs-GhZFPH4_neg_peak_4239	4.30791	6.44539	2.56005	3.59E-07	0.00275391	Distal Intergenic	82462999	82467933	4935	2	Gohir.A11G228600.1	366945	IPR000070,IPR006501,IPR011050,IPR012334,IPR035513	Pectinesterase, catalytic|Pectinesterase inhibitor domain|Pectin lyase fold/virulence factor|Pectin lyase fold|Invertase/pectin methylesterase inhibitor domain superfamily	-	-	GO:0004857,GO:0030599,GO:0042545	enzyme inhibitor activity|pectinesterase activity|cell wall modification	-	-
Gohir.A11G229800	A11	93011988	93012097	110	GhZFPH4_DAP-vs-GhZFPH4_neg_peak_4276	4.30791	6.44539	2.56005	3.59E-07	0.00275391	Distal Intergenic	92956684	92962660	5977	2	Gohir.A11G229800.1	-49328	IPR002293,IPR029485	Amino acid/polyamine transporter I|Cationic amino acid transporter, C-terminal	-	-	GO:0016020,GO:0022857,GO:0055085	membrane|transmembrane transporter activity|transmembrane transport	ko01522	Endocrine resistance
Gohir.A11G236340	A11	98315115	98315455	341	GhZFPH4_DAP-vs-GhZFPH4_neg_peak_4292	4.30791	6.44539	2.56005	3.59E-07	0.00275391	Distal Intergenic	98303284	98308075	4792	2	Gohir.A11G236340.2	-7040	IPR012474	Frigida-like	-	-	-	-	-	-
Gohir.A11G240000	A11	101091710	101091970	261	GhZFPH4_DAP-vs-GhZFPH4_neg_peak_4304	4.30791	6.44539	2.56005	3.59E-07	0.00275391	Downstream (2-3kb)	101084712	101087254	2543	2	Gohir.A11G240000.1	-4456	IPR013766,IPR036249	Thioredoxin domain|Thioredoxin-like superfamily	-	-	-	-	-	-
Gohir.A11G274000	A11	113502201	113502368	168	GhZFPH4_DAP-vs-GhZFPH4_neg_peak_4336	4.30791	6.44539	2.56005	3.59E-07	0.00275391	Intron (Gohir.A11G274000.2/Gohir.A11G274000, intron 4 of 22)	113496728	113517003	20276	1	Gohir.A11G274000.3	5473	IPR021717,IPR035192	Nucleoporin Nup120/160|Nuclear pore complex protein NUP160	K14303	nuclear pore complex protein Nup160	-	-	ko01522,ko03013	Endocrine resistance|RNA transport
Gohir.A12G011900	A12	1528798	1529099	302	GhZFPH4_DAP-vs-GhZFPH4_neg_peak_4360	4.30791	6.44539	2.56005	3.59E-07	0.00275391	Promoter (1-2kb)	1530464	1532524	2061	1	Gohir.A12G011900.1	-1365	IPR001509,IPR033267,IPR036291	NAD-dependent epimerase/dehydratase|Tetraketide alpha-pyrone reductase 1|NAD(P)-binding domain superfamily	-	-	GO:0003824,GO:0009555,GO:0080110	catalytic activity|pollen development|sporopollenin biosynthetic process	-	-
Gohir.A12G054250	A12	11594734	11594939	206	GhZFPH4_DAP-vs-GhZFPH4_neg_peak_4404	4.30791	6.44539	2.56005	3.59E-07	0.00275391	Distal Intergenic	11532310	11532788	479	2	Gohir.A12G054250.1	-61946	-	-	-	-	-	-	-	-
Gohir.A12G073000	A12	24199212	24199542	331	GhZFPH4_DAP-vs-GhZFPH4_neg_peak_4439	4.30791	6.44539	2.56005	3.59E-07	0.00275391	Distal Intergenic	23937158	23937762	605	1	Gohir.A12G073000.1	262054	IPR001353,IPR029055	Proteasome, subunit alpha/beta|Nucleophile aminohydrolases, N-terminal	-	-	GO:0004298,GO:0005839,GO:0051603	threonine-type endopeptidase activity|proteasome core complex|proteolysis involved in cellular protein catabolic process	-	-
Gohir.A12G075500	A12	39060502	39060789	288	GhZFPH4_DAP-vs-GhZFPH4_neg_peak_4494	4.30791	6.44539	2.56005	3.59E-07	0.00275391	Distal Intergenic	39227690	39233220	5531	1	Gohir.A12G075500.5	-166901	IPR003959,IPR027417,IPR036420,IPR002913	ATPase, AAA-type, core|P-loop containing nucleoside triphosphate hydrolase|BRCT domain superfamily|START domain	-	-	GO:0005524,GO:0008289	ATP binding|lipid binding	-	-
Gohir.A12G077500	A12	42833299	42833454	156	GhZFPH4_DAP-vs-GhZFPH4_neg_peak_4508	4.30791	6.44539	2.56005	3.59E-07	0.00275391	Distal Intergenic	43132768	43137957	5190	2	Gohir.A12G077500.1	304503	IPR006710,IPR023296	Glycoside hydrolase, family 43|Glycosyl hydrolase, five-bladed beta-propellor domain superfamily	-	-	GO:0004553,GO:0005975	hydrolase activity, hydrolyzing O-glycosyl compounds|carbohydrate metabolic process	-	-
Gohir.A12G078900	A12	56721273	56721402	130	GhZFPH4_DAP-vs-GhZFPH4_neg_peak_4547	4.30791	6.44539	2.56005	3.59E-07	0.00275391	Distal Intergenic	56664290	56665800	1511	1	Gohir.A12G078900.1	56983	-	-	-	-	-	-	-	-
Gohir.A12G081700	A12	49962561	49962835	275	GhZFPH4_DAP-vs-GhZFPH4_neg_peak_4529	4.30791	6.44539	2.56005	3.59E-07	0.00275391	Distal Intergenic	50039376	50043318	3943	1	Gohir.A12G081700.2	-76541	IPR000719,IPR001245,IPR011009,IPR025875,IPR032675	Protein kinase domain|Serine-threonine/tyrosine-protein kinase, catalytic domain|Protein kinase-like domain superfamily|Leucine rich repeat 4|Leucine-rich repeat domain superfamily	-	-	GO:0004672,GO:0005524,GO:0006468	protein kinase activity|ATP binding|protein phosphorylation	-	-
Gohir.A12G081700	A12	50231725	50232064	340	GhZFPH4_DAP-vs-GhZFPH4_neg_peak_4531	4.30791	6.44539	2.56005	3.59E-07	0.00275391	Distal Intergenic	50039376	50043318	3943	1	Gohir.A12G081700.2	192349	IPR000719,IPR001245,IPR011009,IPR025875,IPR032675	Protein kinase domain|Serine-threonine/tyrosine-protein kinase, catalytic domain|Protein kinase-like domain superfamily|Leucine rich repeat 4|Leucine-rich repeat domain superfamily	-	-	GO:0004672,GO:0005524,GO:0006468	protein kinase activity|ATP binding|protein phosphorylation	-	-
Gohir.A12G087200	A12	32227636	32227804	169	GhZFPH4_DAP-vs-GhZFPH4_neg_peak_4461	4.30791	6.44539	2.56005	3.59E-07	0.00275391	Distal Intergenic	32285494	32288556	3063	2	Gohir.A12G087200.2	60752	IPR009675,IPR027329	TPX2|TPX2, C-terminal	-	-	GO:0005819,GO:0005874,GO:0032147,GO:0060236	spindle|microtubule|activation of protein kinase activity|regulation of mitotic spindle organization	-	-
Gohir.A12G087600	A12	59098547	59098873	327	GhZFPH4_DAP-vs-GhZFPH4_neg_peak_4554	4.30791	6.44539	2.56005	3.59E-07	0.00275391	Distal Intergenic	59065591	59070921	5331	2	Gohir.A12G087600.5	-27626	IPR007462	Protein of unknown function DUF502	-	-	-	-	-	-
Gohir.A12G091244	A12	70682834	70683020	187	GhZFPH4_DAP-vs-GhZFPH4_neg_peak_4605	4.30791	6.44539	2.56005	3.59E-07	0.00275391	Distal Intergenic	70601713	70602315	603	2	Gohir.A12G091244.1	-80519	IPR001469,IPR020546,IPR020547,IPR036771	ATP synthase, F1 complex, delta/epsilon subunit|ATP synthase, F1 complex, delta/epsilon subunit, N-terminal|ATP synthase delta/epsilon subunit, C-terminal domain|F0F1 ATP synthase delta/epsilon subunit, N-terminal	-	-	GO:0015986,GO:0045261,GO:0046933	ATP synthesis coupled proton transport|proton-transporting ATP synthase complex, catalytic core F(1)|proton-transporting ATP synthase activity, rotational mechanism	ko00190,ko00195,ko01522	Oxidative phosphorylation|Photosynthesis|Endocrine resistance
Gohir.A12G093425	A12	72616032	72616310	279	GhZFPH4_DAP-vs-GhZFPH4_neg_peak_4614	4.30791	6.44539	2.56005	3.59E-07	0.00275391	Distal Intergenic	72734382	72738591	4210	1	Gohir.A12G093425.1	-118072	IPR027410	TCP-1-like chaperonin intermediate domain superfamily	-	-	-	-	-	-
Gohir.A12G093600	A12	71864401	71864602	202	GhZFPH4_DAP-vs-GhZFPH4_neg_peak_4609	4.30791	6.44539	2.56005	3.59E-07	0.00275391	Distal Intergenic	71806479	71807381	903	2	Gohir.A12G093600.1	-57020	IPR001024,IPR036392	PLAT/LH2 domain|PLAT/LH2 domain superfamily	-	-	GO:0005515	protein binding	-	-
Gohir.A12G096100	A12	77229857	77229967	111	GhZFPH4_DAP-vs-GhZFPH4_neg_peak_4639	4.30791	6.44539	2.56005	3.59E-07	0.00275391	Promoter (1-2kb)	77228922	77231148	2227	2	Gohir.A12G096100.1	1181	IPR001236,IPR001557,IPR010945,IPR011274,IPR015955,IPR022383,IPR036291	Lactate/malate dehydrogenase, N-terminal|L-lactate/malate dehydrogenase|Malate dehydrogenase, type 2|Malate dehydrogenase, NAD-dependent, cytosolic|Lactate dehydrogenase/glycoside hydrolase, family 4, C-terminal|Lactate/malate dehydrogenase, C-terminal|NAD(P)-binding domain superfamily	K00025	malate dehydrogenase [EC:1.1.1.37]	GO:0003824,GO:0005975,GO:0006108,GO:0016491,GO:0016615,GO:0016616,GO:0019752,GO:0030060,GO:0055114	catalytic activity|carbohydrate metabolic process|malate metabolic process|oxidoreductase activity|malate dehydrogenase activity|oxidoreductase activity, acting on the CH-OH group of donors, NAD or NADP as acceptor|carboxylic acid metabolic process|L-malate dehydrogenase activity|oxidation-reduction process	ko00020,ko00270,ko00620,ko00630,ko00710,ko04964	Citrate cycle (TCA cycle)|Cysteine and methionine metabolism|Pyruvate metabolism|Glyoxylate and dicarboxylate metabolism|Carbon fixation in photosynthetic organisms|Proximal tubule bicarbonate reclamation
Gohir.A12G101000	A12	78780012	78780177	166	GhZFPH4_DAP-vs-GhZFPH4_neg_peak_4651	4.30791	6.44539	2.56005	3.59E-07	0.00275391	Promoter (<=1kb)	78776367	78779916	3550	2	Gohir.A12G101000.1	-96	IPR000535,IPR008962,IPR013783,IPR016763	Major sperm protein (MSP) domain|PapD-like superfamily|Immunoglobulin-like fold|Vesicle-associated membrane-protein-associated protein	-	-	GO:0005789	endoplasmic reticulum membrane	-	-
Gohir.A12G133400	A12	86261753	86261946	194	GhZFPH4_DAP-vs-GhZFPH4_neg_peak_4672	4.30791	6.44539	2.56005	3.59E-07	0.00275391	Distal Intergenic	86271203	86281755	10553	2	Gohir.A12G133400.1	19809	IPR001841,IPR003347,IPR018866	Zinc finger, RING-type|JmjC domain|Zinc-finger domain of monoamine-oxidase A repressor R1	K15601	[histone H3]-dimethyl-L-lysine9 demethylase [EC:1.14.11.65]	-	-	ko01522,ko04714	Endocrine resistance|Thermogenesis
Gohir.A12G138000	A12	87578194	87578396	203	GhZFPH4_DAP-vs-GhZFPH4_neg_peak_4675	4.30791	6.44539	2.56005	3.59E-07	0.00275391	Promoter (1-2kb)	87576632	87579539	2908	1	Gohir.A12G138000.1	1562	IPR005061,IPR042277	Vacuolar protein sorting-associated protein Ist1|Vacuolar protein sorting-associated protein IST1-like	-	-	GO:0015031	protein transport	ko04144	Endocytosis
Gohir.A12G144500	A12	89878920	89879061	142	GhZFPH4_DAP-vs-GhZFPH4_neg_peak_4684	4.30791	6.44539	2.56005	3.59E-07	0.00275391	Downstream (2-3kb)	89881445	89885192	3748	2	Gohir.A12G144500.1	6131	IPR001392,IPR011012,IPR022775,IPR028565,IPR036168	Clathrin adaptor, mu subunit|Longin-like domain superfamily|AP complex, mu/sigma subunit|Mu homology domain|AP-2 complex subunit mu, C-terminal superfamily	K12393	AP-1 complex subunit mu	GO:0006886,GO:0016192,GO:0030131	intracellular protein transport|vesicle-mediated transport|clathrin adaptor complex	ko01522,ko04142	Endocrine resistance|Lysosome
Gohir.A12G155600	A12	93026446	93026639	194	GhZFPH4_DAP-vs-GhZFPH4_neg_peak_4693	4.30791	6.44539	2.56005	3.59E-07	0.00275391	Promoter (1-2kb)	93015414	93024605	9192	2	Gohir.A12G155600.2	-1841	IPR009457,IPR040226	Domain of unknown function DUF1084|THH1/TOM1/TOM3	-	-	-	-	-	-
Gohir.A12G159700	A12	94023038	94023201	164	GhZFPH4_DAP-vs-GhZFPH4_neg_peak_4695	4.30791	6.44539	2.56005	3.59E-07	0.00275391	Distal Intergenic	94026819	94031164	4346	1	Gohir.A12G159700.2	-3618	IPR002110,IPR020683,IPR036770	Ankyrin repeat|Ankyrin repeat-containing domain|Ankyrin repeat-containing domain superfamily	-	-	GO:0005515	protein binding	-	-
Gohir.A12G195200	A12	100937519	100937710	192	GhZFPH4_DAP-vs-GhZFPH4_neg_peak_4723	4.30791	6.44539	2.56005	3.59E-07	0.00275391	Distal Intergenic	100915787	100921866	6080	2	Gohir.A12G195200.1	-15653	IPR000778,IPR002048,IPR011992,IPR013112,IPR013121,IPR013130,IPR013623,IPR017927,IPR017938,IPR039261	Cytochrome b245, heavy chain|EF-hand domain|EF-hand domain pair|FAD-binding 8|Ferric reductase, NAD binding domain|Ferric reductase transmembrane component-like domain|NADPH oxidase Respiratory burst|FAD-binding domain, ferredoxin reductase-type|Riboflavin synthase-like beta-barrel|Ferredoxin-NADP reductase (FNR), nucleotide-binding domain	K13447	respiratory burst oxidase [EC:1.6.3.- 1.11.1.-]	GO:0004601,GO:0005509,GO:0016020,GO:0016491,GO:0050664,GO:0055114	peroxidase activity|calcium ion binding|membrane|oxidoreductase activity|oxidoreductase activity, acting on NAD(P)H, oxygen as acceptor|oxidation-reduction process	ko04016,ko04626	MAPK signaling pathway - plant|Plant-pathogen interaction
Gohir.A12G204200	A12	102061810	102061988	179	GhZFPH4_DAP-vs-GhZFPH4_neg_peak_4728	4.30791	6.44539	2.56005	3.59E-07	0.00275391	Promoter (<=1kb)	102060763	102062316	1554	2	Gohir.A12G204200.1	328	IPR002213	UDP-glucuronosyl/UDP-glucosyltransferase	-	-	GO:0008194	UDP-glycosyltransferase activity	-	-
Gohir.A12G212800	A12	103122574	103122695	122	GhZFPH4_DAP-vs-GhZFPH4_neg_peak_4731	4.30791	6.44539	2.56005	3.59E-07	0.00275391	Distal Intergenic	103138494	103173253	34760	1	Gohir.A12G212800.3	-15799	IPR001537,IPR016024,IPR029026,IPR029028	tRNA/rRNA methyltransferase, SpoU type|Armadillo-type fold|tRNA (guanine-N1-)-methyltransferase, N-terminal|Alpha/beta knot methyltransferases	K15333	tRNA guanosine-2'-O-methyltransferase [EC:2.1.1.34]	GO:0003723,GO:0006396,GO:0008173	RNA binding|RNA processing|RNA methyltransferase activity	ko01522	Endocrine resistance
Gohir.A12G220100	A12	104037721	104037885	165	GhZFPH4_DAP-vs-GhZFPH4_neg_peak_4733	4.30791	6.44539	2.56005	3.59E-07	0.00275391	Distal Intergenic	104033916	104037374	3459	1	Gohir.A12G220100.2	3805	IPR005202	Transcription factor GRAS	-	-	-	-	-	-
Gohir.A12G233320	A12	105193126	105193306	181	GhZFPH4_DAP-vs-GhZFPH4_neg_peak_4757	4.30791	6.44539	2.56005	3.59E-07	0.00275391	Distal Intergenic	105183514	105184631	1118	1	Gohir.A12G233320.1	9612	IPR004864	Late embryogenesis abundant protein, LEA_2 subgroup	-	-	-	-	-	-
Gohir.A12G273066	A12	109064248	109064392	145	GhZFPH4_DAP-vs-GhZFPH4_neg_peak_4766	4.30791	6.44539	2.56005	3.59E-07	0.00275391	Promoter (1-2kb)	109065656	109075888	10233	1	Gohir.A12G273066.1	-1264	IPR003165,IPR012337,IPR036397	Piwi domain|Ribonuclease H-like superfamily|Ribonuclease H superfamily	-	-	GO:0003676	nucleic acid binding	-	-
Gohir.A13G000300	A13	183704	184068	365	GhZFPH4_DAP-vs-GhZFPH4_neg_peak_4768	4.30791	6.44539	2.56005	3.59E-07	0.00275391	Promoter (<=1kb)	183702	191611	7910	1	Gohir.A13G000300.1	2	IPR003959,IPR016527,IPR027417,IPR032705	ATPase, AAA-type, core|Origin recognition complex subunit 4|P-loop containing nucleoside triphosphate hydrolase|Origin recognition complex subunit 4, C-terminal	-	-	GO:0000808,GO:0003677,GO:0005524,GO:0005634,GO:0006260	origin recognition complex|DNA binding|ATP binding|nucleus|DNA replication	ko01522,ko04110,ko04111,ko04113	Endocrine resistance|Cell cycle|Cell cycle - yeast|Meiosis - yeast
Gohir.A13G016000	A13	1925705	1925919	215	GhZFPH4_DAP-vs-GhZFPH4_neg_peak_4770	4.30791	6.44539	2.56005	3.59E-07	0.00275391	Promoter (1-2kb)	1927809	1929829	2021	1	Gohir.A13G016000.1	-1890	IPR001790,IPR030670,IPR040637,IPR043141,IPR043164	Ribosomal protein L10P|60S acidic ribosomal protein P0|60S ribosomal protein L10P, insertion domain|Ribosomal protein L10-like domain superfamily|50S ribosomal protein L10, insertion domain superfamily	-	-	GO:0042254	ribosome biogenesis	-	-
Gohir.A13G066151	A13	15310287	15310416	130	GhZFPH4_DAP-vs-GhZFPH4_neg_peak_4807	4.30791	6.44539	2.56005	3.59E-07	0.00275391	Promoter (<=1kb)	15308596	15310481	1886	2	Gohir.A13G066151.1	65	IPR016140,IPR036312,IPR043325	Bifunctional inhibitor/plant lipid transfer protein/seed storage helical domain|Bifunctional inhibitor/plant lipid transfer protein/seed storage helical domain superfamily|Alpha-Amylase Inhibitors (AAI), Lipid Transfer (LT) and Seed Storage (SS) Protein	-	-	-	-	-	-
Gohir.A13G075600	A13	36000308	36000795	488	GhZFPH4_DAP-vs-GhZFPH4_neg_peak_4876	4.30791	6.44539	2.56005	3.59E-07	0.00275391	Distal Intergenic	35862230	35885228	22999	2	Gohir.A13G075600.2	-115080	IPR000873,IPR002372,IPR011047,IPR015943,IPR025110,IPR036736,IPR042099	AMP-dependent synthetase/ligase|Pyrrolo-quinoline quinone repeat|Quinoprotein alcohol dehydrogenase-like superfamily|WD40/YVTN repeat-like-containing domain superfamily|AMP-binding enzyme, C-terminal domain|ACP-like superfamily|AMP-dependent synthetase-like superfamily	K00142	acyl-CoA synthetase [EC:6.2.1.-]	GO:0003824,GO:0005515	catalytic activity|protein binding	ko01522	Endocrine resistance
Gohir.A13G078866	A13	33871859	33872095	237	GhZFPH4_DAP-vs-GhZFPH4_neg_peak_4870	4.30791	6.44539	2.56005	3.59E-07	0.00275391	Distal Intergenic	33982488	33985925	3438	1	Gohir.A13G078866.1	-110393	IPR003231,IPR009081,IPR036736	Acyl carrier protein (ACP)|Phosphopantetheine binding ACP domain|ACP-like superfamily	-	-	GO:0006633	fatty acid biosynthetic process	ko00061,ko00190,ko04714,ko04723	Fatty acid biosynthesis|Oxidative phosphorylation|Thermogenesis|Retrograde endocannabinoid signaling
Gohir.A13G085000	A13	23712629	23712758	130	GhZFPH4_DAP-vs-GhZFPH4_neg_peak_4831	4.30791	6.44539	2.56005	3.59E-07	0.00275391	Distal Intergenic	23579968	23581253	1286	2	Gohir.A13G085000.2	-131376	IPR000717,IPR036390,IPR040773	Proteasome component (PCI) domain|Winged helix DNA-binding domain superfamily|26S proteasome regulatory subunit Rpn6, N-terminal	-	-	-	-	-	-
Gohir.A13G085300	A13	37271800	37271919	120	GhZFPH4_DAP-vs-GhZFPH4_neg_peak_4882	4.30791	6.44539	2.56005	3.59E-07	0.00275391	Distal Intergenic	37521239	37526394	5156	1	Gohir.A13G085300.2	-249320	IPR031985	Protein of unknown function DUF4787	-	-	-	-	-	-
Gohir.A13G092200	A13	56247065	56247399	335	GhZFPH4_DAP-vs-GhZFPH4_neg_peak_4955	4.30791	6.44539	2.56005	3.59E-07	0.00275391	Distal Intergenic	56251663	56257516	5854	1	Gohir.A13G092200.2	-4264	IPR000462,IPR014472,IPR043130	CDP-alcohol phosphatidyltransferase|Choline/ethanolamine phosphotransferase|CDP-alcohol phosphotransferase, transmembrane domain	K00993	ethanolaminephosphotransferase [EC:2.7.8.1]	GO:0008654,GO:0016020,GO:0016780	phospholipid biosynthetic process|membrane|phosphotransferase activity, for other substituted phosphate groups	ko00440,ko00564,ko00565	Phosphonate and phosphinate metabolism|Glycerophospholipid metabolism|Ether lipid metabolism
Gohir.A13G096500	A13	64190316	64190429	114	GhZFPH4_DAP-vs-GhZFPH4_neg_peak_4989	4.30791	6.44539	2.56005	3.59E-07	0.00275391	Distal Intergenic	64474346	64475588	1243	2	Gohir.A13G096500.1	285159	IPR006476	Conserved hypothetical protein CHP01589, plant	-	-	-	-	-	-
Gohir.A13G099505	A13	67330751	67330914	164	GhZFPH4_DAP-vs-GhZFPH4_neg_peak_5001	4.30791	6.44539	2.56005	3.59E-07	0.00275391	Promoter (2-3kb)	67332917	67333493	577	1	Gohir.A13G099505.1	-2003	-	-	-	-	-	-	-	-
Gohir.A13G099905	A13	67876347	67876512	166	GhZFPH4_DAP-vs-GhZFPH4_neg_peak_5005	4.30791	6.44539	2.56005	3.59E-07	0.00275391	Distal Intergenic	67666535	67671935	5401	1	Gohir.A13G099905.1	209812	IPR027057,IPR032456	CAAX prenyl protease 1|CAAX prenyl protease 1, N-terminal	-	-	GO:0008233,GO:0071586	peptidase activity|CAAX-box protein processing	-	-
Gohir.A13G121500	A13	87198190	87198343	154	GhZFPH4_DAP-vs-GhZFPH4_neg_peak_5067	4.30791	6.44539	2.56005	3.59E-07	0.00275391	Distal Intergenic	87294833	87297635	2803	1	Gohir.A13G121500.1	-96490	-	-	-	-	-	-	-	-
Gohir.A13G122233	A13	88277691	88278060	370	GhZFPH4_DAP-vs-GhZFPH4_neg_peak_5072	4.30791	6.44539	2.56005	3.59E-07	0.00275391	Promoter (<=1kb)	88276845	88277703	859	2	Gohir.A13G122233.1	0	IPR002068,IPR008978,IPR031107	Alpha crystallin/Hsp20 domain|HSP20-like chaperone|Small heat shock protein HSP20	-	-	-	-	ko01522,ko04141	Endocrine resistance|Protein processing in endoplasmic reticulum
Gohir.A13G138700	A13	94665519	94665698	180	GhZFPH4_DAP-vs-GhZFPH4_neg_peak_5091	4.30791	6.44539	2.56005	3.59E-07	0.00275391	Distal Intergenic	94672212	94675047	2836	1	Gohir.A13G138700.1	-6514	IPR004843,IPR008963,IPR015914,IPR025733,IPR029052,IPR039331	Calcineurin-like phosphoesterase domain, ApaH type|Purple acid phosphatase-like, N-terminal|Purple acid phosphatase, N-terminal|Iron/zinc purple acid phosphatase-like C-terminal domain|Metallo-dependent phosphatase-like|Purple acid phosphatase-like	-	-	GO:0003993,GO:0016787,GO:0046872	acid phosphatase activity|hydrolase activity|metal ion binding	ko01522	Endocrine resistance
Gohir.A13G152600	A13	98919811	98919934	124	GhZFPH4_DAP-vs-GhZFPH4_neg_peak_5103	4.30791	6.44539	2.56005	3.59E-07	0.00275391	Promoter (<=1kb)	98919774	98921484	1711	1	Gohir.A13G152600.1	37	IPR005123,IPR026992,IPR027443	Oxoglutarate/iron-dependent dioxygenase|Non-haem dioxygenase N-terminal domain|Isopenicillin N synthase-like	K23145	scopoletin 8-hydroxylase [EC:1.14.11.60]	GO:0016491,GO:0055114	oxidoreductase activity|oxidation-reduction process	ko01522	Endocrine resistance
Gohir.A13G172400	A13	104250453	104250557	105	GhZFPH4_DAP-vs-GhZFPH4_neg_peak_5116	4.30791	6.44539	2.56005	3.59E-07	0.00275391	Promoter (1-2kb)	104252517	104255157	2641	1	Gohir.A13G172400.1	-1960	IPR013094,IPR029058	Alpha/beta hydrolase fold-3|Alpha/Beta hydrolase fold	K14493	gibberellin receptor GID1 [EC:3.-.-.-]	GO:0016787	hydrolase activity	ko04075	Plant hormone signal transduction
Gohir.D01G021100	D01	1825344	1825519	176	GhZFPH4_DAP-vs-GhZFPH4_neg_peak_5135	4.30791	6.44539	2.56005	3.59E-07	0.00275391	Promoter (2-3kb)	1828420	1832754	4335	1	Gohir.D01G021100.3	-2901	IPR013210,IPR024788,IPR025875,IPR032675	Leucine-rich repeat-containing N-terminal, plant-type|Malectin-like domain|Leucine rich repeat 4|Leucine-rich repeat domain superfamily	-	-	-	-	-	-
Gohir.D01G079500	D01	12771909	12772075	167	GhZFPH4_DAP-vs-GhZFPH4_neg_peak_5172	4.30791	6.44539	2.56005	3.59E-07	0.00275391	Distal Intergenic	12725194	12734208	9015	2	Gohir.D01G079500.1	-37701	IPR000178,IPR000795,IPR005225,IPR009000,IPR015760,IPR023115,IPR027417,IPR036925	Translation initiation factor aIF-2, bacterial-like|Transcription factor, GTP-binding domain|Small GTP-binding protein domain|Translation protein, beta-barrel domain superfamily|Translation initiation factor IF- 2|Translation initiation factor IF- 2, domain 3|P-loop containing nucleoside triphosphate hydrolase|Translation initiation factor IF-2, domain 3 superfamily	K02519	translation initiation factor IF-2	GO:0003743,GO:0003924,GO:0005525,GO:0006413	translation initiation factor activity|GTPase activity|GTP binding|translational initiation	ko01522	Endocrine resistance
Gohir.D01G125000	D01	30483168	30483325	158	GhZFPH4_DAP-vs-GhZFPH4_neg_peak_5289	4.30791	6.44539	2.56005	3.59E-07	0.00275391	Distal Intergenic	30471265	30473866	2602	1	Gohir.D01G125000.5	11903	IPR001841,IPR008974,IPR013010,IPR013083,IPR018121	Zinc finger, RING-type|TRAF-like|Zinc finger, SIAH-type|Zinc finger, RING/FYVE/PHD-type|Seven-in-absentia protein, TRAF-like domain	K04506	E3 ubiquitin-protein ligase SIAH1 [EC:2.3.2.27]	GO:0005515,GO:0006511,GO:0007275,GO:0008270,GO:0042025	protein binding|ubiquitin-dependent protein catabolic process|multicellular organism development|zinc ion binding|host cell nucleus	ko01522,ko04013,ko04115,ko04120,ko04310	Endocrine resistance|MAPK signaling pathway - fly|p53 signaling pathway|Ubiquitin mediated proteolysis|Wnt signaling pathway
Gohir.D01G125500	D01	31402814	31403025	212	GhZFPH4_DAP-vs-GhZFPH4_neg_peak_5294	4.30791	6.44539	2.56005	3.59E-07	0.00275391	Distal Intergenic	31468762	31470837	2076	1	Gohir.D01G125500.1	-65737	IPR005123,IPR026992,IPR027443	Oxoglutarate/iron-dependent dioxygenase|Non-haem dioxygenase N-terminal domain|Isopenicillin N synthase-like	-	-	GO:0016491,GO:0055114	oxidoreductase activity|oxidation-reduction process	-	-
Gohir.D01G130900	D01	38272615	38272864	250	GhZFPH4_DAP-vs-GhZFPH4_neg_peak_5317	4.30791	6.44539	2.56005	3.59E-07	0.00275391	Distal Intergenic	38631713	38641799	10087	2	Gohir.D01G130900.1	368935	IPR001365,IPR006329,IPR032466	Adenosine/AMP deaminase domain|AMP deaminase|Metal-dependent hydrolase	K01490	AMP deaminase [EC:3.5.4.6]	GO:0003876,GO:0019239,GO:0032264	AMP deaminase activity|deaminase activity|IMP salvage	ko00230	Purine metabolism
Gohir.D01G136900	D01	43268909	43269046	138	GhZFPH4_DAP-vs-GhZFPH4_neg_peak_5338	4.30791	6.44539	2.56005	3.59E-07	0.00275391	Distal Intergenic	43197347	43201063	3717	2	Gohir.D01G136900.3	-67846	IPR027417	P-loop containing nucleoside triphosphate hydrolase	-	-	-	-	-	-
Gohir.D01G139700	D01	44290293	44290463	171	GhZFPH4_DAP-vs-GhZFPH4_neg_peak_5341	4.30791	6.44539	2.56005	3.59E-07	0.00275391	Distal Intergenic	44297386	44297966	581	2	Gohir.D01G139700.1	7503	IPR000571,IPR036855	Zinc finger, CCCH-type|Zinc finger, CCCH-type superfamily	-	-	GO:0046872	metal ion binding	-	-
Gohir.D01G184501	D01	60800283	60800496	214	GhZFPH4_DAP-vs-GhZFPH4_neg_peak_5391	4.30791	6.44539	2.56005	3.59E-07	0.00275391	Downstream (2-3kb)	60795640	60799179	3540	1	Gohir.D01G184501.1	4643	-	-	-	-	-	-	-	-
Gohir.D01G188600	D01	61282152	61282392	241	GhZFPH4_DAP-vs-GhZFPH4_neg_peak_5392	4.30791	6.44539	2.56005	3.59E-07	0.00275391	Promoter (2-3kb)	61279938	61285134	5197	1	Gohir.D01G188600.1	2214	IPR005135,IPR031615,IPR036691	Endonuclease/exonuclease/phosphatase|MYND-like zinc finger, mRNA-binding|Endonuclease/exonuclease/phosphatase superfamily	-	-	-	-	-	-
Gohir.D02G043950	D02	5592003	5592146	144	GhZFPH4_DAP-vs-GhZFPH4_neg_peak_5415	4.30791	6.44539	2.56005	3.59E-07	0.00275391	Promoter (<=1kb)	5591840	5592559	720	1	Gohir.D02G043950.1	163	-	-	-	-	-	-	-	-
Gohir.D02G058100	D02	7893199	7893389	191	GhZFPH4_DAP-vs-GhZFPH4_neg_peak_5422	4.30791	6.44539	2.56005	3.59E-07	0.00275391	Distal Intergenic	7886053	7889026	2974	2	Gohir.D02G058100.1	-4173	-	-	K01913	acetate/butyrate---CoA ligase [EC:6.2.1.1 6.2.1.2]	-	-	ko00010,ko00620,ko00630,ko00650,ko01522	Glycolysis / Gluconeogenesis|Pyruvate metabolism|Glyoxylate and dicarboxylate metabolism|Butanoate metabolism|Endocrine resistance
Gohir.D02G076440	D02	11934923	11935100	178	GhZFPH4_DAP-vs-GhZFPH4_neg_peak_5434	4.30791	6.44539	2.56005	3.59E-07	0.00275391	Promoter (2-3kb)	11934530	11937994	3465	2	Gohir.D02G076440.1	2894	-	-	-	-	-	-	-	-
Gohir.D02G103200	D02	25792219	25792485	267	GhZFPH4_DAP-vs-GhZFPH4_neg_peak_5483	4.30791	6.44539	2.56005	3.59E-07	0.00275391	Distal Intergenic	25763835	25778040	14206	2	Gohir.D02G103200.2	-14179	-	-	-	-	-	-	-	-
Gohir.D02G103900	D02	26499814	26499971	158	GhZFPH4_DAP-vs-GhZFPH4_neg_peak_5489	4.30791	6.44539	2.56005	3.59E-07	0.00275391	Distal Intergenic	26510834	26515687	4854	1	Gohir.D02G103900.1	-10863	-	-	-	-	-	-	-	-
Gohir.D02G113000	D02	36910344	36910506	163	GhZFPH4_DAP-vs-GhZFPH4_neg_peak_5530	4.30791	6.44539	2.56005	3.59E-07	0.00275391	Distal Intergenic	36926211	36935819	9609	2	Gohir.D02G113000.1	25313	-	-	K15363	fanconi-associated nuclease 1 [EC:3.1.21.- 3.1.4.1]	-	-	ko01522,ko03460	Endocrine resistance|Fanconi anemia pathway
Gohir.D02G134700	D02	49009575	49009809	235	GhZFPH4_DAP-vs-GhZFPH4_neg_peak_5591	4.30791	6.44539	2.56005	3.59E-07	0.00275391	Distal Intergenic	49022316	49023943	1628	1	Gohir.D02G134700.1	-12507	-	-	K00430	peroxidase [EC:1.11.1.7]	-	-	ko00940	Phenylpropanoid biosynthesis
Gohir.D02G142501	D02	53570902	53571090	189	GhZFPH4_DAP-vs-GhZFPH4_neg_peak_5615	4.30791	6.44539	2.56005	3.59E-07	0.00275391	Distal Intergenic	53581085	53584998	3914	1	Gohir.D02G142501.1	-9995	-	-	-	-	-	-	-	-
Gohir.D02G147933	D02	56502041	56502256	216	GhZFPH4_DAP-vs-GhZFPH4_neg_peak_5627	4.30791	6.44539	2.56005	3.59E-07	0.00275391	Distal Intergenic	56515032	56519248	4217	1	Gohir.D02G147933.2	-12776	-	-	-	-	-	-	-	-
Gohir.D02G188100	D02	66932310	66932456	147	GhZFPH4_DAP-vs-GhZFPH4_neg_peak_5663	4.30791	6.44539	2.56005	3.59E-07	0.00275391	Promoter (2-3kb)	66933799	66935066	1268	2	Gohir.D02G188100.1	2610	-	-	-	-	-	-	-	-
Gohir.D02G211100	D02	70006192	70006390	199	GhZFPH4_DAP-vs-GhZFPH4_neg_peak_5674	4.30791	6.44539	2.56005	3.59E-07	0.00275391	Distal Intergenic	69995675	69996637	963	2	Gohir.D02G211100.1	-9555	-	-	-	-	-	-	-	-
Gohir.D02G233800	D02	71737174	71737396	223	GhZFPH4_DAP-vs-GhZFPH4_neg_peak_5676	4.30791	6.44539	2.56005	3.59E-07	0.00275391	Promoter (<=1kb)	71736804	71737963	1160	1	Gohir.D02G233800.2	370	-	-	-	-	-	-	-	-
Gohir.D03G039000	D03	5014839	5015033	195	GhZFPH4_DAP-vs-GhZFPH4_neg_peak_5691	4.30791	6.44539	2.56005	3.59E-07	0.00275391	Distal Intergenic	4998926	5000832	1907	2	Gohir.D03G039000.1	-14007	IPR002213	UDP-glucuronosyl/UDP-glucosyltransferase	-	-	GO:0008194	UDP-glycosyltransferase activity	-	-
Gohir.D03G044200	D03	6248705	6248867	163	GhZFPH4_DAP-vs-GhZFPH4_neg_peak_5692	4.30791	6.44539	2.56005	3.59E-07	0.00275391	Distal Intergenic	6264610	6265625	1016	2	Gohir.D03G044200.1	16758	IPR006121,IPR036163	Heavy metal-associated domain, HMA|Heavy metal-associated domain superfamily	-	-	GO:0030001,GO:0046872	metal ion transport|metal ion binding	-	-
Gohir.D03G058300	D03	11613385	11613499	115	GhZFPH4_DAP-vs-GhZFPH4_neg_peak_5700	4.30791	6.44539	2.56005	3.59E-07	0.00275391	Distal Intergenic	11596295	11605153	8859	2	Gohir.D03G058300.1	-8232	IPR003439,IPR013525,IPR013581,IPR027417,IPR029481	ABC transporter-like|ABC-2 type transporter|Plant PDR ABC transporter associated|P-loop containing nucleoside triphosphate hydrolase|ABC-transporter N-terminal domain	-	-	GO:0005524,GO:0016020,GO:0016887	ATP binding|membrane|ATPase activity	-	-
Gohir.D03G067100	D03	24217214	24217430	217	GhZFPH4_DAP-vs-GhZFPH4_neg_peak_5743	4.30791	6.44539	2.56005	3.59E-07	0.00275391	Distal Intergenic	24208287	24211709	3423	2	Gohir.D03G067100.2	-5505	IPR004146	DC1	-	-	-	-	-	-
Gohir.D03G073400	D03	14131731	14131879	149	GhZFPH4_DAP-vs-GhZFPH4_neg_peak_5712	4.30791	6.44539	2.56005	3.59E-07	0.00275391	Promoter (1-2kb)	14128402	14132987	4586	2	Gohir.D03G073400.1	1108	IPR003959,IPR015415,IPR027417,IPR028596,IPR041569	ATPase, AAA-type, core|Vps4 oligomerisation, C-terminal|P-loop containing nucleoside triphosphate hydrolase|Katanin p60 subunit A1|AAA ATPase, AAA+ lid domain	K07767	katanin p60 ATPase-containing subunit A1 [EC:5.6.1.1]	GO:0005524,GO:0008017,GO:0008568,GO:0051013	ATP binding|microtubule binding|microtubule-severing ATPase activity|microtubule severing	ko01522	Endocrine resistance
Gohir.D03G100000	D03	40357920	40358067	148	GhZFPH4_DAP-vs-GhZFPH4_neg_peak_5820	4.30791	6.44539	2.56005	3.59E-07	0.00275391	Distal Intergenic	40366343	40370173	3831	2	Gohir.D03G100000.1	12106	IPR000941,IPR020810,IPR020811,IPR029017,IPR036849	Enolase|Enolase, C-terminal TIM barrel domain|Enolase, N-terminal|Enolase-like, N-terminal|Enolase-like, C-terminal domain superfamily	K01689	enolase [EC:4.2.1.11]	GO:0000015,GO:0000287,GO:0004634,GO:0006096	phosphopyruvate hydratase complex|magnesium ion binding|phosphopyruvate hydratase activity|glycolytic process	ko00010,ko00680,ko01522,ko03018,ko04066	Glycolysis / Gluconeogenesis|Methane metabolism|Endocrine resistance|RNA degradation|HIF-1 signaling pathway
Gohir.D03G103900	D03	41552742	41552927	186	GhZFPH4_DAP-vs-GhZFPH4_neg_peak_5823	4.30791	6.44539	2.56005	3.59E-07	0.00275391	Distal Intergenic	41541796	41542653	858	2	Gohir.D03G103900.1	-10089	-	-	-	-	-	-	-	-
Gohir.D03G103900	D03	41604732	41604894	163	GhZFPH4_DAP-vs-GhZFPH4_neg_peak_5824	4.30791	6.44539	2.56005	3.59E-07	0.00275391	Distal Intergenic	41541796	41542653	858	2	Gohir.D03G103900.1	-62079	-	-	-	-	-	-	-	-
Gohir.D03G146100	D03	50908367	50908543	177	GhZFPH4_DAP-vs-GhZFPH4_neg_peak_5854	4.30791	6.44539	2.56005	3.59E-07	0.00275391	Distal Intergenic	50901106	50904221	3116	2	Gohir.D03G146100.1	-4146	IPR019616,IPR038409	Uncharacterised protein family Ycf54|Ycf54-like superfamily	-	-	-	-	-	-
Gohir.D04G004700	D04	987405	987598	194	GhZFPH4_DAP-vs-GhZFPH4_neg_peak_5874	4.30791	6.44539	2.56005	3.59E-07	0.00275391	Promoter (1-2kb)	986395	992391	5997	1	Gohir.D04G004700.3	1010	IPR000447,IPR006076,IPR031656,IPR036188,IPR038299	FAD-dependent glycerol-3-phosphate dehydrogenase|FAD dependent oxidoreductase|Alpha-glycerophosphate oxidase, C-terminal|FAD/NAD(P)-binding domain superfamily|Alpha-glycerophosphate oxidase, C-terminal domain superfamily	K00111	glycerol-3-phosphate dehydrogenase [EC:1.1.5.3]	GO:0004368,GO:0006072,GO:0009331,GO:0016491,GO:0055114	glycerol-3-phosphate dehydrogenase (quinone) activity|glycerol-3-phosphate metabolic process|glycerol-3-phosphate dehydrogenase complex|oxidoreductase activity|oxidation-reduction process	ko00564	Glycerophospholipid metabolism
Gohir.D04G051600	D04	8965970	8966248	279	GhZFPH4_DAP-vs-GhZFPH4_neg_peak_5884	4.30791	6.44539	2.56005	3.59E-07	0.00275391	Promoter (2-3kb)	8968814	8972265	3452	1	Gohir.D04G051600.1	-2566	IPR000719,IPR011009	Protein kinase domain|Protein kinase-like domain superfamily	K08286	protein-serine/threonine kinase [EC:2.7.11.-]	GO:0004672,GO:0005524,GO:0006468	protein kinase activity|ATP binding|protein phosphorylation	ko01522	Endocrine resistance
Gohir.D04G055600	D04	9966698	9966883	186	GhZFPH4_DAP-vs-GhZFPH4_neg_peak_5887	4.30791	6.44539	2.56005	3.59E-07	0.00275391	Promoter (1-2kb)	9964686	9968271	3586	2	Gohir.D04G055600.2	1388	IPR000313	PWWP domain	-	-	-	-	-	-
Gohir.D04G057500	D04	10279646	10279752	107	GhZFPH4_DAP-vs-GhZFPH4_neg_peak_5889	4.30791	6.44539	2.56005	3.59E-07	0.00275391	Promoter (2-3kb)	10279061	10282331	3271	2	Gohir.D04G057500.1	2579	IPR032675,IPR036047	Leucine-rich repeat domain superfamily|F-box-like domain superfamily	K10268	F-box and leucine-rich repeat protein 2/20	GO:0005515	protein binding	ko01522	Endocrine resistance
Gohir.D04G061533	D04	11301418	11301580	163	GhZFPH4_DAP-vs-GhZFPH4_neg_peak_5891	4.30791	6.44539	2.56005	3.59E-07	0.00275391	Distal Intergenic	11324894	11325298	405	1	Gohir.D04G061533.1	-23314	IPR013210,IPR032675	Leucine-rich repeat-containing N-terminal, plant-type|Leucine-rich repeat domain superfamily	-	-	-	-	-	-
Gohir.D04G064700	D04	12053179	12053338	160	GhZFPH4_DAP-vs-GhZFPH4_neg_peak_5892	4.30791	6.44539	2.56005	3.59E-07	0.00275391	Distal Intergenic	12034351	12039715	5365	1	Gohir.D04G064700.1	18828	IPR000408,IPR009091	Regulator of chromosome condensation, RCC1|Regulator of chromosome condensation 1/beta-lactamase-inhibitor protein II	-	-	-	-	-	-
Gohir.D04G071500	D04	14426873	14427042	170	GhZFPH4_DAP-vs-GhZFPH4_neg_peak_5900	4.30791	6.44539	2.56005	3.59E-07	0.00275391	Promoter (<=1kb)	14425823	14427795	1973	2	Gohir.D04G071500.1	753	IPR005202,IPR030008	Transcription factor GRAS|Scarecrow-like protein 3	-	-	GO:0003700,GO:0005634,GO:0009739	DNA-binding transcription factor activity|nucleus|response to gibberellin	-	-
Gohir.D04G086700	D04	21580377	21580564	188	GhZFPH4_DAP-vs-GhZFPH4_neg_peak_5921	4.30791	6.44539	2.56005	3.59E-07	0.00275391	Distal Intergenic	21626924	21629184	2261	1	Gohir.D04G086700.1	-46360	IPR001509,IPR036291	NAD-dependent epimerase/dehydratase|NAD(P)-binding domain superfamily	K08679	UDP-glucuronate 4-epimerase [EC:5.1.3.6]	GO:0003824	catalytic activity	ko00520	Amino sugar and nucleotide sugar metabolism
Gohir.D04G088700	D04	23211566	23211713	148	GhZFPH4_DAP-vs-GhZFPH4_neg_peak_5927	4.30791	6.44539	2.56005	3.59E-07	0.00275391	Distal Intergenic	23169148	23191947	22800	1	Gohir.D04G088700.3	42418	IPR002938,IPR028348,IPR036188	FAD-binding domain|FAD dependent protein|FAD/NAD(P)-binding domain superfamily	-	-	GO:0071949	FAD binding	-	-
Gohir.D04G099100	D04	35498656	35498765	110	GhZFPH4_DAP-vs-GhZFPH4_neg_peak_6005	4.30791	6.44539	2.56005	3.59E-07	0.00275391	Distal Intergenic	35439351	35440175	825	2	Gohir.D04G099100.1	-58481	-	-	-	-	-	-	-	-
Gohir.D04G108800	D04	40766393	40766572	180	GhZFPH4_DAP-vs-GhZFPH4_neg_peak_6029	4.30791	6.44539	2.56005	3.59E-07	0.00275391	Distal Intergenic	40748460	40751576	3117	1	Gohir.D04G108800.1	17933	IPR001806,IPR005225,IPR027417	Small GTPase|Small GTP-binding protein domain|P-loop containing nucleoside triphosphate hydrolase	K07910	Ras-related protein Rab-18	GO:0003924,GO:0005525	GTPase activity|GTP binding	ko01522	Endocrine resistance
Gohir.D04G110400	D04	41149789	41149932	144	GhZFPH4_DAP-vs-GhZFPH4_neg_peak_6031	4.30791	6.44539	2.56005	3.59E-07	0.00275391	Downstream (1-2kb)	41151195	41153551	2357	2	Gohir.D04G110400.1	3619	IPR002133,IPR022628,IPR022629,IPR022630,IPR022636	S-adenosylmethionine synthetase|S-adenosylmethionine synthetase, N-terminal|S-adenosylmethionine synthetase, central domain|S-adenosylmethionine synthetase, C-terminal|S-adenosylmethionine synthetase superfamily	K00789	S-adenosylmethionine synthetase [EC:2.5.1.6]	GO:0004478,GO:0005524,GO:0006556	methionine adenosyltransferase activity|ATP binding|S-adenosylmethionine biosynthetic process	ko00270	Cysteine and methionine metabolism
Gohir.D04G130300	D04	48196373	48196544	172	GhZFPH4_DAP-vs-GhZFPH4_neg_peak_6048	4.30791	6.44539	2.56005	3.59E-07	0.00275391	Distal Intergenic	48177806	48182509	4704	1	Gohir.D04G130300.1	18567	IPR013830,IPR036514	SGNH hydrolase-type esterase domain|SGNH hydrolase superfamily	K23978	isoamyl acetate esterase [EC:3.1.1.112]	-	-	ko01522	Endocrine resistance
Gohir.D04G136900	D04	49617799	49617946	148	GhZFPH4_DAP-vs-GhZFPH4_neg_peak_6054	4.30791	6.44539	2.56005	3.59E-07	0.00275391	Promoter (1-2kb)	49615527	49616720	1194	2	Gohir.D04G136900.1	-1079	IPR004045,IPR004046,IPR010987,IPR036249,IPR036282	Glutathione S-transferase, N-terminal|Glutathione S-transferase, C-terminal|Glutathione S-transferase, C-terminal-like|Thioredoxin-like superfamily|Glutathione S-transferase, C-terminal domain superfamily	K00799	glutathione S-transferase [EC:2.5.1.18]	GO:0005515	protein binding	ko00480,ko00980,ko00982,ko00983,ko01522,ko01524,ko04212,ko05204,ko05225,ko05418	Glutathione metabolism|Metabolism of xenobiotics by cytochrome P450|Drug metabolism - cytochrome P450|Drug metabolism - other enzymes|Endocrine resistance|Platinum drug resistance|Longevity regulating pathway - worm|Chemical carcinogenesis|Hepatocellular carcinoma|Fluid shear stress and atherosclerosis
Gohir.D05G025900	D05	2256728	2256839	112	GhZFPH4_DAP-vs-GhZFPH4_neg_peak_6078	4.30791	6.44539	2.56005	3.59E-07	0.00275391	Promoter (<=1kb)	2256996	2262962	5967	1	Gohir.D05G025900.1	-157	-	-	-	-	-	-	-	-
Gohir.D05G122750	D05	10532656	10532910	255	GhZFPH4_DAP-vs-GhZFPH4_neg_peak_6099	4.30791	6.44539	2.56005	3.59E-07	0.00275391	Distal Intergenic	10522284	10523284	1001	2	Gohir.D05G122750.1	-9372	-	-	-	-	-	-	-	-
Gohir.D05G209100	D05	18678869	18679020	152	GhZFPH4_DAP-vs-GhZFPH4_neg_peak_6119	4.30791	6.44539	2.56005	3.59E-07	0.00275391	Promoter (2-3kb)	18676411	18679174	2764	1	Gohir.D05G209100.1	2458	-	-	-	-	-	-	-	-
Gohir.D05G271700	D05	26747729	26747851	123	GhZFPH4_DAP-vs-GhZFPH4_neg_peak_6139	4.30791	6.44539	2.56005	3.59E-07	0.00275391	Promoter (1-2kb)	26741420	26749338	7919	2	Gohir.D05G271700.1	1487	IPR002495,IPR005067,IPR009078,IPR012348,IPR029044,IPR030519	Glycosyl transferase, family 8|Fatty acid desaturase, type 2|Ferritin-like superfamily|Ribonucleotide reductase-like|Nucleotide-diphospho-sugar transferases|UDP-glucuronate:xylan alpha-glucuronosyltransferase	K20890	xylan alpha-glucuronosyltransferase [EC:2.4.1.-]	GO:0005794,GO:0006631,GO:0009834,GO:0015020,GO:0016491,GO:0016757,GO:0045300,GO:0045492,GO:0055114	Golgi apparatus|fatty acid metabolic process|plant-type secondary cell wall biogenesis|glucuronosyltransferase activity|oxidoreductase activity|transferase activity, transferring glycosyl groups|acyl-[acyl-carrier-protein] desaturase activity|xylan biosynthetic process|oxidation-reduction process	ko01522	Endocrine resistance
Gohir.D05G305500	D05	35701324	35701536	213	GhZFPH4_DAP-vs-GhZFPH4_neg_peak_6161	4.30791	6.44539	2.56005	3.59E-07	0.00275391	Distal Intergenic	35707908	35711769	3862	1	Gohir.D05G305500.2	-6372	-	-	K11593	eukaryotic translation initiation factor 2C	-	-	ko01522,ko04361	Endocrine resistance|Axon regeneration
Gohir.D05G325801	D05	50967141	50967477	337	GhZFPH4_DAP-vs-GhZFPH4_neg_peak_6212	4.30791	6.44539	2.56005	3.59E-07	0.00275391	Promoter (<=1kb)	50966814	50968394	1581	1	Gohir.D05G325801.1	327	-	-	-	-	-	-	-	-
Gohir.D05G331700	D05	53348577	53348823	247	GhZFPH4_DAP-vs-GhZFPH4_neg_peak_6220	4.30791	6.44539	2.56005	3.59E-07	0.00275391	Distal Intergenic	53365722	53369733	4012	2	Gohir.D05G331700.1	20910	-	-	-	-	-	-	-	-
Gohir.D05G338300	D05	54907634	54908052	419	GhZFPH4_DAP-vs-GhZFPH4_neg_peak_6230	4.30791	6.44539	2.56005	3.59E-07	0.00275391	Distal Intergenic	54888006	54896861	8856	2	Gohir.D05G338300.2	-10773	-	-	K16055	trehalose 6-phosphate synthase/phosphatase [EC:2.4.1.15 3.1.3.12]	-	-	ko00500,ko01522	Starch and sucrose metabolism|Endocrine resistance
Gohir.D05G338460	D05	55201416	55201537	122	GhZFPH4_DAP-vs-GhZFPH4_neg_peak_6231	4.30791	6.44539	2.56005	3.59E-07	0.00275391	Distal Intergenic	55145046	55149542	4497	2	Gohir.D05G338460.1	-51874	-	-	-	-	-	-	-	-
Gohir.D05G338933	D05	55720600	55720708	109	GhZFPH4_DAP-vs-GhZFPH4_neg_peak_6233	4.30791	6.44539	2.56005	3.59E-07	0.00275391	Distal Intergenic	55707466	55708863	1398	2	Gohir.D05G338933.1	-11737	-	-	-	-	-	-	-	-
Gohir.D05G346300	D05	58166701	58166890	190	GhZFPH4_DAP-vs-GhZFPH4_neg_peak_6237	4.30791	6.44539	2.56005	3.59E-07	0.00275391	Exon (Gohir.D05G346300.1/Gohir.D05G346300, exon 6 of 8)	58164500	58172199	7700	2	Gohir.D05G346300.1	5309	-	-	-	-	-	-	-	-
Gohir.D05G352700	D05	59352597	59352756	160	GhZFPH4_DAP-vs-GhZFPH4_neg_peak_6244	4.30791	6.44539	2.56005	3.59E-07	0.00275391	Promoter (<=1kb)	59352590	59353418	829	1	Gohir.D05G352700.1	7	-	-	-	-	-	-	-	-
Gohir.D05G387450	D05	66293476	66293684	209	GhZFPH4_DAP-vs-GhZFPH4_neg_peak_6265	4.30791	6.44539	2.56005	3.59E-07	0.00275391	Exon (Gohir.D05G387450.1/Gohir.D05G387450, exon 5 of 35)	66281753	66297127	15375	2	Gohir.D05G387450.1	3443	-	-	-	-	-	-	ko01522,ko03050	Endocrine resistance|Proteasome
Gohir.D06G109500	D06	27079790	27080113	324	GhZFPH4_DAP-vs-GhZFPH4_neg_peak_6374	4.30791	6.44539	2.56005	3.59E-07	0.00275391	Distal Intergenic	27121324	27123313	1990	1	Gohir.D06G109500.1	-41211	IPR004827	Basic-leucine zipper domain	-	-	GO:0003700,GO:0006355	DNA-binding transcription factor activity|regulation of transcription, DNA-templated	-	-
Gohir.D06G112250	D06	29404313	29404513	201	GhZFPH4_DAP-vs-GhZFPH4_neg_peak_6381	4.30791	6.44539	2.56005	3.59E-07	0.00275391	Distal Intergenic	29465786	29476576	10791	1	Gohir.D06G112250.1	-61273	IPR001360,IPR017853	Glycoside hydrolase family 1|Glycoside hydrolase superfamily	-	-	GO:0004553,GO:0005975	hydrolase activity, hydrolyzing O-glycosyl compounds|carbohydrate metabolic process	-	-
Gohir.D06G118400	D06	33326803	33326956	154	GhZFPH4_DAP-vs-GhZFPH4_neg_peak_6391	4.30791	6.44539	2.56005	3.59E-07	0.00275391	Distal Intergenic	33441696	33443647	1952	2	Gohir.D06G118400.1	116691	IPR004158	Protein of unknown function DUF247, plant	-	-	-	-	-	-
Gohir.D06G125400	D06	41688671	41688827	157	GhZFPH4_DAP-vs-GhZFPH4_neg_peak_6419	4.30791	6.44539	2.56005	3.59E-07	0.00275391	Promoter (1-2kb)	41690163	41692966	2804	1	Gohir.D06G125400.1	-1336	IPR000719,IPR001245,IPR002902,IPR011009,IPR038408	Protein kinase domain|Serine-threonine/tyrosine-protein kinase, catalytic domain|Gnk2-homologous domain|Protein kinase-like domain superfamily|Gnk2-homologous domain superfamily	-	-	GO:0004672,GO:0005524,GO:0006468	protein kinase activity|ATP binding|protein phosphorylation	-	-
Gohir.D06G127200	D06	42365283	42365438	156	GhZFPH4_DAP-vs-GhZFPH4_neg_peak_6420	4.30791	6.44539	2.56005	3.59E-07	0.00275391	Promoter (1-2kb)	42363700	42366182	2483	1	Gohir.D06G127200.2	1583	IPR004367,IPR006671,IPR031093,IPR036915,IPR039361	Cyclin, C-terminal domain|Cyclin, N-terminal|Cyclin D, plant|Cyclin-like superfamily|Cyclin	-	-	GO:0005634,GO:0042025,GO:0051726	nucleus|host cell nucleus|regulation of cell cycle	ko01522	Endocrine resistance
Gohir.D06G127300	D06	42689682	42689943	262	GhZFPH4_DAP-vs-GhZFPH4_neg_peak_6423	4.30791	6.44539	2.56005	3.59E-07	0.00275391	Distal Intergenic	42626551	42630542	3992	2	Gohir.D06G127300.3	-59140	IPR000270	PB1 domain	-	-	GO:0005515	protein binding	-	-
Gohir.D06G134450	D06	47149410	47149538	129	GhZFPH4_DAP-vs-GhZFPH4_neg_peak_6436	4.30791	6.44539	2.56005	3.59E-07	0.00275391	Distal Intergenic	47098080	47119390	21311	1	Gohir.D06G134450.4	51330	IPR001087,IPR036514	GDSL lipase/esterase|SGNH hydrolase superfamily	-	-	GO:0016788	hydrolase activity, acting on ester bonds	-	-
Gohir.D06G135900	D06	48170151	48170363	213	GhZFPH4_DAP-vs-GhZFPH4_neg_peak_6444	4.30791	6.44539	2.56005	3.59E-07	0.00275391	Distal Intergenic	48205247	48206250	1004	1	Gohir.D06G135900.1	-34884	IPR040344	Uncharacterized protein At3g17950-like	-	-	-	-	-	-
Gohir.D07G094500	D07	12023774	12024024	251	GhZFPH4_DAP-vs-GhZFPH4_neg_peak_6521	4.30791	6.44539	2.56005	3.59E-07	0.00275391	Intron (Gohir.D07G094450.1/Gohir.D07G094450, intron 4 of 5)	12027786	12033579	5794	1	Gohir.D07G094500.1	-3762	IPR001320,IPR001638,IPR028082	Ionotropic glutamate receptor|Solute-binding protein family 3/N-terminal domain of MltF|Periplasmic binding protein-like I	K05387	glutamate receptor, ionotropic, plant	GO:0015276,GO:0016020	ligand-gated ion channel activity|membrane	ko01522	Endocrine resistance
Gohir.D07G139100	D07	22144841	22145163	323	GhZFPH4_DAP-vs-GhZFPH4_neg_peak_6539	4.30791	6.44539	2.56005	3.59E-07	0.00275391	Distal Intergenic	22155063	22156159	1097	1	Gohir.D07G139100.1	-9900	IPR032238,IPR035906	Putative ATP-synthase-associated protein|MetI-like superfamily	-	-	-	-	-	-
Gohir.D07G141500	D07	22750138	22750256	119	GhZFPH4_DAP-vs-GhZFPH4_neg_peak_6542	4.30791	6.44539	2.56005	3.59E-07	0.00275391	Promoter (<=1kb)	22749069	22751210	2142	2	Gohir.D07G141500.1	954	IPR003851	Zinc finger, Dof-type	-	-	GO:0003677,GO:0006355	DNA binding|regulation of transcription, DNA-templated	-	-
Gohir.D07G152800	D07	26209552	26209686	135	GhZFPH4_DAP-vs-GhZFPH4_neg_peak_6567	4.30791	6.44539	2.56005	3.59E-07	0.00275391	Distal Intergenic	26215227	26217244	2018	1	Gohir.D07G152800.1	-5541	IPR006734	Protein of unknown function DUF597	-	-	-	-	-	-
Gohir.D07G162400	D07	30653302	30653506	205	GhZFPH4_DAP-vs-GhZFPH4_neg_peak_6605	4.30791	6.44539	2.56005	3.59E-07	0.00275391	Distal Intergenic	30640034	30643232	3199	2	Gohir.D07G162400.2	-10070	IPR001388,IPR010908,IPR011012,IPR042855	Synaptobrevin|Longin domain|Longin-like domain superfamily|v-SNARE, coiled-coil homology domain	-	-	GO:0016021,GO:0016192	integral component of membrane|vesicle-mediated transport	-	-
Gohir.D07G165100	D07	31535855	31536052	198	GhZFPH4_DAP-vs-GhZFPH4_neg_peak_6607	4.30791	6.44539	2.56005	3.59E-07	0.00275391	Distal Intergenic	31478244	31480916	2673	2	Gohir.D07G165100.2	-54939	IPR002885,IPR011990	Pentatricopeptide repeat|Tetratricopeptide-like helical domain superfamily	-	-	GO:0005515	protein binding	-	-
Gohir.D07G165624	D07	31957643	31957813	171	GhZFPH4_DAP-vs-GhZFPH4_neg_peak_6611	4.30791	6.44539	2.56005	3.59E-07	0.00275391	Promoter (<=1kb)	31957541	31958017	477	1	Gohir.D07G165624.1	102	IPR008801	Rapid ALkalinization Factor	-	-	-	-	-	-
Gohir.D07G170800	D07	35238104	35238318	215	GhZFPH4_DAP-vs-GhZFPH4_neg_peak_6624	4.30791	6.44539	2.56005	3.59E-07	0.00275391	Promoter (2-3kb)	35233666	35240396	6731	2	Gohir.D07G170800.1	2078	IPR004147,IPR011009	UbiB domain|Protein kinase-like domain superfamily	-	-	-	-	-	-
Gohir.D07G177500	D07	39407635	39407854	220	GhZFPH4_DAP-vs-GhZFPH4_neg_peak_6634	4.30791	6.44539	2.56005	3.59E-07	0.00275391	Promoter (<=1kb)	39404294	39406841	2548	2	Gohir.D07G177500.1	-794	IPR000192,IPR015421,IPR015422,IPR015424,IPR022278	Aminotransferase class V domain|Pyridoxal phosphate-dependent transferase, major domain|Pyridoxal phosphate-dependent transferase domain 1|Pyridoxal phosphate-dependent transferase|Phosphoserine aminotransferase	K00831	phosphoserine aminotransferase [EC:2.6.1.52]	GO:0003824,GO:0004648,GO:0006564	catalytic activity|O-phospho-L-serine:2-oxoglutarate aminotransferase activity|L-serine biosynthetic process	ko00260,ko00270,ko00680,ko00750,ko01522	Glycine, serine and threonine metabolism|Cysteine and methionine metabolism|Methane metabolism|Vitamin B6 metabolism|Endocrine resistance
Gohir.D07G178100	D07	39533583	39533773	191	GhZFPH4_DAP-vs-GhZFPH4_neg_peak_6635	4.30791	6.44539	2.56005	3.59E-07	0.00275391	Distal Intergenic	39554180	39556939	2760	1	Gohir.D07G178100.1	-20407	IPR001356,IPR009057	Homeobox domain|Homeobox-like domain superfamily	-	-	GO:0003677	DNA binding	-	-
Gohir.D07G184100	D07	46632643	46632830	188	GhZFPH4_DAP-vs-GhZFPH4_neg_peak_6664	4.30791	6.44539	2.56005	3.59E-07	0.00275391	Promoter (1-2kb)	46631163	46632654	1492	1	Gohir.D07G184100.1	1480	IPR009025,IPR036603	DNA-directed RNA polymerase, RBP11-like dimerisation domain|RNA polymerase, RBP11-like subunit	K03020	DNA-directed RNA polymerases I and III subunit RPAC2	GO:0006351,GO:0046983	transcription, DNA-templated|protein dimerization activity	ko01522,ko03020,ko04623	Endocrine resistance|RNA polymerase|Cytosolic DNA-sensing pathway
Gohir.D07G188300	D07	48476658	48476862	205	GhZFPH4_DAP-vs-GhZFPH4_neg_peak_6670	4.30791	6.44539	2.56005	3.59E-07	0.00275391	Distal Intergenic	48446179	48446780	602	1	Gohir.D07G188300.1	30479	-	-	-	-	-	-	-	-
Gohir.D07G213700	D07	55512055	55512234	180	GhZFPH4_DAP-vs-GhZFPH4_neg_peak_6688	4.30791	6.44539	2.56005	3.59E-07	0.00275391	Distal Intergenic	55517869	55524642	6774	1	Gohir.D07G213700.1	-5635	IPR007700,IPR021864	Domain of unknown function DUF668|Domain of unknown function DUF3475	-	-	GO:0045927	positive regulation of growth	-	-
Gohir.D08G020600	D08	1606690	1606880	191	GhZFPH4_DAP-vs-GhZFPH4_neg_peak_6707	4.30791	6.44539	2.56005	3.59E-07	0.00275391	Promoter (2-3kb)	1606674	1609474	2801	2	Gohir.D08G020600.1	2594	-	-	-	-	-	-	-	-
Gohir.D08G037101	D08	3031972	3032226	255	GhZFPH4_DAP-vs-GhZFPH4_neg_peak_6709	4.30791	6.44539	2.56005	3.59E-07	0.00275391	Promoter (2-3kb)	3032420	3034921	2502	2	Gohir.D08G037101.1	2695	IPR000528,IPR016140,IPR036312,IPR043325	Plant lipid transfer protein/Par allergen|Bifunctional inhibitor/plant lipid transfer protein/seed storage helical domain|Bifunctional inhibitor/plant lipid transfer protein/seed storage helical domain superfamily|Alpha-Amylase Inhibitors (AAI), Lipid Transfer (LT) and Seed Storage (SS) Protein	-	-	GO:0006869,GO:0008289	lipid transport|lipid binding	-	-
Gohir.D08G069900	D08	8559827	8559946	120	GhZFPH4_DAP-vs-GhZFPH4_neg_peak_6721	4.30791	6.44539	2.56005	3.59E-07	0.00275391	Distal Intergenic	8542432	8542947	516	2	Gohir.D08G069900.1	-16880	IPR013087,IPR036236	Zinc finger C2H2-type|Zinc finger C2H2 superfamily	-	-	-	-	-	-
Gohir.D08G075500	D08	10126721	10126834	114	GhZFPH4_DAP-vs-GhZFPH4_neg_peak_6727	4.30791	6.44539	2.56005	3.59E-07	0.00275391	Distal Intergenic	10116583	10118598	2016	2	Gohir.D08G075500.2	-8123	IPR013922,IPR036915	Cyclin PHO80-like|Cyclin-like superfamily	-	-	GO:0000079,GO:0019901	regulation of cyclin-dependent protein serine/threonine kinase activity|protein kinase binding	-	-
Gohir.D08G077750	D08	10789150	10789296	147	GhZFPH4_DAP-vs-GhZFPH4_neg_peak_6730	4.30791	6.44539	2.56005	3.59E-07	0.00275391	Promoter (2-3kb)	10791556	10791804	249	1	Gohir.D08G077750.1	-2260	IPR001865,IPR005706,IPR023591	Ribosomal protein S2|Ribosomal protein S2, bacteria/mitochondria/plastid|Ribosomal protein S2, flavodoxin-like domain superfamily	-	-	GO:0003735,GO:0005840,GO:0006412,GO:0015935	structural constituent of ribosome|ribosome|translation|small ribosomal subunit	-	-
Gohir.D08G086101	D08	12945633	12945766	134	GhZFPH4_DAP-vs-GhZFPH4_neg_peak_6733	4.30791	6.44539	2.56005	3.59E-07	0.00275391	Promoter (<=1kb)	12941789	12944739	2951	2	Gohir.D08G086101.1	-894	-	-	-	-	-	-	-	-
Gohir.D08G092150	D08	16951895	16952046	152	GhZFPH4_DAP-vs-GhZFPH4_neg_peak_6766	4.30791	6.44539	2.56005	3.59E-07	0.00275391	Distal Intergenic	16926038	16926872	835	2	Gohir.D08G092150.1	-25023	IPR004827	Basic-leucine zipper domain	-	-	GO:0003700,GO:0006355	DNA-binding transcription factor activity|regulation of transcription, DNA-templated	-	-
Gohir.D08G092932	D08	17388329	17388480	152	GhZFPH4_DAP-vs-GhZFPH4_neg_peak_6768	4.30791	6.44539	2.56005	3.59E-07	0.00275391	Distal Intergenic	17371459	17373889	2431	1	Gohir.D08G092932.1	16870	-	-	-	-	-	-	-	-
Gohir.D08G094350	D08	18682437	18682601	165	GhZFPH4_DAP-vs-GhZFPH4_neg_peak_6773	4.30791	6.44539	2.56005	3.59E-07	0.00275391	Distal Intergenic	18694354	18694746	393	1	Gohir.D08G094350.1	-11753	IPR000047,IPR001356,IPR009057	Helix-turn-helix motif|Homeobox domain|Homeobox-like domain superfamily	-	-	GO:0003677	DNA binding	-	-
Gohir.D08G101050	D08	24229286	24229641	356	GhZFPH4_DAP-vs-GhZFPH4_neg_peak_6789	4.30791	6.44539	2.56005	3.59E-07	0.00275391	Distal Intergenic	24242383	24243024	642	2	Gohir.D08G101050.1	13383	IPR008502	Prolamin-like domain	-	-	-	-	-	-
Gohir.D08G114508	D08	32648021	32648203	183	GhZFPH4_DAP-vs-GhZFPH4_neg_peak_6825	4.30791	6.44539	2.56005	3.59E-07	0.00275391	Distal Intergenic	32653707	32653979	273	1	Gohir.D08G114508.1	-5504	-	-	-	-	-	-	-	-
Gohir.D08G121300	D08	39551573	39551760	188	GhZFPH4_DAP-vs-GhZFPH4_neg_peak_6873	4.30791	6.44539	2.56005	3.59E-07	0.00275391	Distal Intergenic	39558860	39559698	839	1	Gohir.D08G121300.1	-7100	-	-	-	-	-	-	-	-
Gohir.D08G131200	D08	42783325	42783583	259	GhZFPH4_DAP-vs-GhZFPH4_neg_peak_6898	4.30791	6.44539	2.56005	3.59E-07	0.00275391	Promoter (<=1kb)	42782706	42783482	777	2	Gohir.D08G131200.1	0	-	-	-	-	-	-	-	-
Gohir.D08G133400	D08	44145924	44146122	199	GhZFPH4_DAP-vs-GhZFPH4_neg_peak_6913	4.30791	6.44539	2.56005	3.59E-07	0.00275391	Distal Intergenic	44078396	44082588	4193	2	Gohir.D08G133400.1	-63336	IPR043424	Protein BRANCHLESS TRICHOME-like	-	-	-	-	-	-
Gohir.D08G138850	D08	46354127	46354260	134	GhZFPH4_DAP-vs-GhZFPH4_neg_peak_6915	4.30791	6.44539	2.56005	3.59E-07	0.00275391	Downstream (<1kb)	46354553	46360365	5813	2	Gohir.D08G138850.1	6105	IPR022742,IPR029058	Serine aminopeptidase, S33|Alpha/Beta hydrolase fold	-	-	-	-	-	-
Gohir.D08G139100	D08	46486732	46486872	141	GhZFPH4_DAP-vs-GhZFPH4_neg_peak_6918	4.30791	6.44539	2.56005	3.59E-07	0.00275391	Distal Intergenic	46479326	46480608	1283	1	Gohir.D08G139100.1	7406	IPR001471,IPR016177,IPR036955	AP2/ERF domain|DNA-binding domain superfamily|AP2/ERF domain superfamily	K09286	EREBP-like factor	GO:0003677,GO:0003700,GO:0006355	DNA binding|DNA-binding transcription factor activity|regulation of transcription, DNA-templated	ko01522	Endocrine resistance
Gohir.D08G170600	D08	55030603	55030779	177	GhZFPH4_DAP-vs-GhZFPH4_neg_peak_6950	4.30791	6.44539	2.56005	3.59E-07	0.00275391	Distal Intergenic	55005584	55009466	3883	2	Gohir.D08G170600.1	-21137	IPR003439,IPR013525,IPR027417	ABC transporter-like|ABC-2 type transporter|P-loop containing nucleoside triphosphate hydrolase	-	-	GO:0005524,GO:0016020,GO:0016887	ATP binding|membrane|ATPase activity	-	-
Gohir.D08G216500	D08	63492075	63492267	193	GhZFPH4_DAP-vs-GhZFPH4_neg_peak_6972	4.30791	6.44539	2.56005	3.59E-07	0.00275391	Promoter (2-3kb)	63490741	63494749	4009	2	Gohir.D08G216500.1	2482	IPR029044	Nucleotide-diphospho-sugar transferases	-	-	-	-	-	-
Gohir.D08G227200	D08	64928630	64928748	119	GhZFPH4_DAP-vs-GhZFPH4_neg_peak_6977	4.30791	6.44539	2.56005	3.59E-07	0.00275391	Distal Intergenic	64919717	64923831	4115	2	Gohir.D08G227200.1	-4799	IPR000907,IPR001024,IPR001246,IPR013819,IPR027433,IPR036226,IPR036392	Lipoxygenase|PLAT/LH2 domain|Lipoxygenase, plant|Lipoxygenase, C-terminal|Lipoxygenase, domain 3|Lipoxigenase, C-terminal domain superfamily|PLAT/LH2 domain superfamily	K15718	linoleate 9S-lipoxygenase [EC:1.13.11.58]	GO:0005515,GO:0016491,GO:0016702,GO:0046872,GO:0055114	protein binding|oxidoreductase activity|oxidoreductase activity, acting on single donors with incorporation of molecular oxygen, incorporation of two atoms of oxygen|metal ion binding|oxidation-reduction process	ko00591	Linoleic acid metabolism
Gohir.D09G014600	D09	3792827	3793008	182	GhZFPH4_DAP-vs-GhZFPH4_neg_peak_6997	4.30791	6.44539	2.56005	3.59E-07	0.00275391	Distal Intergenic	3803153	3806321	3169	1	Gohir.D09G014600.1	-10145	IPR001079,IPR002659,IPR013320	Galectin, carbohydrate recognition domain|Glycosyl transferase, family 31|Concanavalin A-like lectin/glucanase domain superfamily	K14413	beta-1,3-galactosyltransferase [EC:2.4.1.-]	GO:0006486,GO:0016020,GO:0030246	protein glycosylation|membrane|carbohydrate binding	ko00513,ko01522	Various types of N-glycan biosynthesis|Endocrine resistance
Gohir.D09G019600	D09	6429381	6429764	384	GhZFPH4_DAP-vs-GhZFPH4_neg_peak_7004	4.30791	6.44539	2.56005	3.59E-07	0.00275391	Promoter (<=1kb)	6427919	6430017	2099	2	Gohir.D09G019600.1	253	IPR008183,IPR011013,IPR014718,IPR015443	Aldose 1-/Glucose-6-phosphate 1-epimerase|Galactose mutarotase-like domain superfamily|Glycoside hydrolase-type carbohydrate-binding|Aldose 1-epimerase	K01785	aldose 1-epimerase [EC:5.1.3.3]	GO:0003824,GO:0005975,GO:0016853,GO:0019318,GO:0030246	catalytic activity|carbohydrate metabolic process|isomerase activity|hexose metabolic process|carbohydrate binding	ko00010,ko00052	Glycolysis / Gluconeogenesis|Galactose metabolism
Gohir.D09G024800	D09	7885165	7885390	226	GhZFPH4_DAP-vs-GhZFPH4_neg_peak_7010	4.30791	6.44539	2.56005	3.59E-07	0.00275391	Distal Intergenic	7873625	7876298	2674	2	Gohir.D09G024800.3	-8867	IPR005559	CG-1 DNA-binding domain	-	-	GO:0003677	DNA binding	-	-
Gohir.D09G038100	D09	13310236	13310381	146	GhZFPH4_DAP-vs-GhZFPH4_neg_peak_7020	4.30791	6.44539	2.56005	3.59E-07	0.00275391	Distal Intergenic	13317174	13317981	808	1	Gohir.D09G038100.1	-6793	-	-	-	-	-	-	-	-
Gohir.D09G040700	D09	15706668	15706860	193	GhZFPH4_DAP-vs-GhZFPH4_neg_peak_7026	4.30791	6.44539	2.56005	3.59E-07	0.00275391	Distal Intergenic	15756047	15758764	2718	1	Gohir.D09G040700.1	-49187	IPR000846,IPR022663,IPR023940,IPR036291	Dihydrodipicolinate reductase, N-terminal|Dihydrodipicolinate reductase, C-terminal|Dihydrodipicolinate reductase|NAD(P)-binding domain superfamily	K16908	chloroplast NAD(P)H dehydrogenase [EC:1.6.99.-]	GO:0008839,GO:0009089,GO:0055114	4-hydroxy-tetrahydrodipicolinate reductase|lysine biosynthetic process via diaminopimelate|oxidation-reduction process	ko01522	Endocrine resistance
Gohir.D09G041600	D09	17478201	17478375	175	GhZFPH4_DAP-vs-GhZFPH4_neg_peak_7048	4.30791	6.44539	2.56005	3.59E-07	0.00275391	Distal Intergenic	17435395	17438216	2822	1	Gohir.D09G041600.4	42806	IPR005225,IPR006689,IPR027417	Small GTP-binding protein domain|Small GTPase superfamily, ARF/SAR type|P-loop containing nucleoside triphosphate hydrolase	K07952	ADP-ribosylation factor related protein 1	GO:0005525	GTP binding	ko01522	Endocrine resistance
Gohir.D09G042900	D09	18387251	18387365	115	GhZFPH4_DAP-vs-GhZFPH4_neg_peak_7049	4.30791	6.44539	2.56005	3.59E-07	0.00275391	Distal Intergenic	18408263	18417256	8994	1	Gohir.D09G042900.1	-20898	IPR002347,IPR036291	Short-chain dehydrogenase/reductase SDR|NAD(P)-binding domain superfamily	-	-	-	-	-	-
Gohir.D09G044300	D09	20416559	20416707	149	GhZFPH4_DAP-vs-GhZFPH4_neg_peak_7054	4.30791	6.44539	2.56005	3.59E-07	0.00275391	Distal Intergenic	19722029	19724165	2137	1	Gohir.D09G044300.2	694530	IPR005123,IPR027443	Oxoglutarate/iron-dependent dioxygenase|Isopenicillin N synthase-like	-	-	GO:0016491,GO:0055114	oxidoreductase activity|oxidation-reduction process	-	-
[truncated: 7,274 more rows]
