# Supplementary material for: Zinc Finger Protein8 (GhZFP8) Regulates the Initiation of Trichomes in Arabidopsis and the Development of Fiber in Cotton
Source: Plants (Basel). 2024 Feb 8;13(4):492. doi: 10.3390/plants13040492 (PMC10892670; doi:10.3390/plants13040492)
Supplement: Supplementary file 1 [file plants-13-00492-s001.zip › Table S5 GO enrichment analysis of GhZFP8 target genes.xls]

ID	Description	category	ListHits	ListTotal	PopHits	PopTotal	EnrichmentScore	pvalue	p.adjust	Genes
GO:0015979	photosynthesis	biological_process	75	3079	238	36612	3.74712405260903	1.43412583164109e-24	1.21900695689493e-21	Gohir.1Z049380/Gohir.1Z049480/Gohir.1Z049780/Gohir.1Z049880/Gohir.1Z049999/Gohir.1Z050080/Gohir.1Z050180/Gohir.1Z050692/Gohir.1Z078601/Gohir.1Z078701/Gohir.1Z078801/Gohir.A01G128325/Gohir.A01G139613/Gohir.A01G140181/Gohir.A01G150018/Gohir.A01G156900/Gohir.A03G067100/Gohir.A03G093700/Gohir.A04G039135/Gohir.A04G059100/Gohir.A04G096550/Gohir.A05G085900/Gohir.A05G086100/Gohir.A05G086232/Gohir.A05G086…
GO:0008137	NADH dehydrogenase (ubiquinone) activity	molecular_function	31	3079	70	36612	5.26595833526655	1.09200333459525e-15	4.64101417202983e-13	Gohir.1Z049399/Gohir.1Z049402/Gohir.1Z049431/Gohir.1Z049499/Gohir.1Z049581/Gohir.1Z049599/Gohir.1Z049679/Gohir.1Z049731/Gohir.A01G139671/Gohir.A01G143400/Gohir.A03G108600/Gohir.A04G039195/Gohir.A04G053104/Gohir.A07G167090/Gohir.A08G086024/Gohir.A09G046246/Gohir.A09G046292/Gohir.A09G102100/Gohir.A09G102200/Gohir.A09G102300/Gohir.A09G102850/Gohir.A10G087950/Gohir.A11G199666/Gohir.A12G084295/Gohir.A…
GO:0009523	photosystem II	cellular_component	43	3079	145	36612	3.52625908546214	1.1142306806941e-13	3.15698692863328e-11	Gohir.1Z049380/Gohir.1Z049480/Gohir.1Z049880/Gohir.1Z050080/Gohir.1Z050180/Gohir.1Z050692/Gohir.1Z078601/Gohir.1Z078701/Gohir.1Z078801/Gohir.A01G128325/Gohir.A01G140181/Gohir.A01G150018/Gohir.A01G156900/Gohir.A03G093700/Gohir.A04G039135/Gohir.A04G059100/Gohir.A04G096550/Gohir.A05G085900/Gohir.A05G086100/Gohir.A05G086232/Gohir.A06G105000/Gohir.A06G115402/Gohir.A09G043766/Gohir.A09G103025/Gohir.A10…
GO:0009767	photosynthetic electron transport chain	biological_process	23	3079	46	36612	5.94543683013966	2.09324326217198e-13	4.44814193211545e-11	Gohir.1Z049980/Gohir.1Z050180/Gohir.1Z078400/Gohir.1Z078801/Gohir.A01G137450/Gohir.A01G137760/Gohir.A03G137700/Gohir.A07G130966/Gohir.A09G004950/Gohir.A09G044450/Gohir.A09G103025/Gohir.A09G103750/Gohir.A11G228402/Gohir.A12G124750/Gohir.A12G178615/Gohir.A12G178640/Gohir.A12G178675/Gohir.A12G229100/Gohir.D01G101930/Gohir.D01G102034/Gohir.D04G090816/Gohir.D06G113901/Gohir.D08G127760
GO:0009539	photosystem II reaction center	cellular_component	24	3079	51	36612	5.59570525189615	3.48294082911643e-13	5.92099940949793e-11	Gohir.1Z049380/Gohir.1Z049480/Gohir.1Z049880/Gohir.1Z050080/Gohir.1Z050692/Gohir.1Z078701/Gohir.A01G140181/Gohir.A01G150018/Gohir.A04G039135/Gohir.A04G059100/Gohir.A04G096550/Gohir.A05G086100/Gohir.A05G086232/Gohir.A06G115402/Gohir.A09G043766/Gohir.A11G228402/Gohir.A12G076900/Gohir.A12G124966/Gohir.A12G178660/Gohir.D01G101904/Gohir.D01G101930/Gohir.D06G164048/Gohir.D08G128420/Gohir.D11G007301
GO:0015074	DNA integration	biological_process	16	3079	25	36612	7.61015914257876	5.90169918293909e-12	8.36074050916371e-10	Gohir.A01G137552/Gohir.A01G154550/Gohir.A03G080150/Gohir.A04G060726/Gohir.A04G065614/Gohir.A04G067714/Gohir.A05G308150/Gohir.A06G117302/Gohir.A09G030833/Gohir.A09G033875/Gohir.A09G043001/Gohir.A10G224850/Gohir.A11G189066/Gohir.A13G115450/Gohir.D07G170275/Gohir.D11G236701
GO:0019684	photosynthesis, light reaction	biological_process	24	3079	57	36612	5.00668364643339	6.92586950595039e-12	8.40998440008262e-10	Gohir.1Z049980/Gohir.1Z050180/Gohir.1Z050192/Gohir.1Z078801/Gohir.A01G134066/Gohir.A01G137450/Gohir.A04G039105/Gohir.A05G085900/Gohir.A06G105000/Gohir.A08G102600/Gohir.A09G004950/Gohir.A09G044450/Gohir.A09G103025/Gohir.A11G228402/Gohir.A12G124750/Gohir.A12G229100/Gohir.D01G029601/Gohir.D01G101930/Gohir.D01G102034/Gohir.D04G090816/Gohir.D06G072250/Gohir.D06G113901/Gohir.D08G127100/Gohir.D08G127760
GO:0045156	electron transporter, transferring electrons within the cyclic electron transport pathway of photosynthesis activity	molecular_function	17	3079	31	36612	6.5208016846693	4.24254348401753e-11	4.50770245176863e-09	Gohir.1Z050192/Gohir.1Z078400/Gohir.1Z078801/Gohir.A01G134066/Gohir.A01G137760/Gohir.A03G137700/Gohir.A04G039105/Gohir.A07G130966/Gohir.A08G102600/Gohir.A09G103750/Gohir.A12G178615/Gohir.A12G178640/Gohir.A12G178675/Gohir.D01G102034/Gohir.D06G072250/Gohir.D08G127100/Gohir.D08G127760
GO:0016651	oxidoreductase activity, acting on NAD(P)H	molecular_function	17	3079	41	36612	4.93036224938411	1.06909221117241e-08	9.42660114271147e-07	Gohir.1Z049399/Gohir.1Z049531/Gohir.1Z049599/Gohir.1Z049694/Gohir.A01G112200/Gohir.A03G134205/Gohir.A04G053130/Gohir.A07G170100/Gohir.A09G046292/Gohir.A09G102100/Gohir.A09G102300/Gohir.A12G147700/Gohir.A13G086335/Gohir.D01G102268/Gohir.D04G175000/Gohir.D08G108108/Gohir.D11G334151
GO:0042773	ATP synthesis coupled electron transport	biological_process	14	3079	28	36612	5.94543683013966	1.10901189914253e-08	9.42660114271147e-07	Gohir.1Z049402/Gohir.1Z049531/Gohir.1Z049581/Gohir.1Z049731/Gohir.A01G112200/Gohir.A01G139671/Gohir.A01G143400/Gohir.A04G039195/Gohir.A04G053130/Gohir.A07G167090/Gohir.A11G199666/Gohir.A12G084295/Gohir.A12G229700/Gohir.D04G175000
GO:0009579	thylakoid	cellular_component	18	3079	48	36612	4.45907762260474	2.62027557475453e-08	2.02475839867395e-06	Gohir.1Z049780/Gohir.1Z049999/Gohir.A01G139613/Gohir.A07G155816/Gohir.A07G163672/Gohir.A07G163690/Gohir.A07G166934/Gohir.A08G015250/Gohir.A08G213450/Gohir.A09G103348/Gohir.A11G101366/Gohir.A12G124933/Gohir.A13G095745/Gohir.D01G102333/Gohir.D03G073920/Gohir.D08G089133/Gohir.D08G129740/Gohir.D13G125950
GO:0009507	chloroplast	cellular_component	22	3079	77	36612	3.39739247436552	2.19980064886526e-07	1.55819212627956e-05	Gohir.1Z050492/Gohir.A01G118333/Gohir.A03G089101/Gohir.A03G137650/Gohir.A04G039060/Gohir.A04G039120/Gohir.A04G039150/Gohir.A05G086350/Gohir.A05G129275/Gohir.A08G070362/Gohir.A08G095662/Gohir.A08G120966/Gohir.A09G046146/Gohir.A09G102032/Gohir.A10G035050/Gohir.A12G088950/Gohir.D01G101865/Gohir.D04G138850/Gohir.D08G129740/Gohir.D08G169950/Gohir.D11G067240/Gohir.D11G237280
GO:0009521	photosystem	cellular_component	10	3079	18	36612	6.6060409223774	4.05797361014303e-07	2.29951837908105e-05	Gohir.1Z049980/Gohir.1Z078801/Gohir.A01G137450/Gohir.A09G004950/Gohir.A09G044450/Gohir.A12G124750/Gohir.A12G229100/Gohir.D01G102034/Gohir.D06G113901/Gohir.D08G127760
GO:0016168	chlorophyll binding	molecular_function	10	3079	18	36612	6.6060409223774	4.05797361014303e-07	2.29951837908105e-05	Gohir.1Z049980/Gohir.1Z078801/Gohir.A01G137450/Gohir.A09G004950/Gohir.A09G044450/Gohir.A12G124750/Gohir.A12G229100/Gohir.D01G102034/Gohir.D06G113901/Gohir.D08G127760
GO:0042651	thylakoid membrane	cellular_component	10	3079	18	36612	6.6060409223774	4.05797361014303e-07	2.29951837908105e-05	Gohir.1Z078400/Gohir.A01G137760/Gohir.A03G137700/Gohir.A07G130966/Gohir.A09G017925/Gohir.A09G046200/Gohir.A09G103750/Gohir.A12G178615/Gohir.A12G178640/Gohir.A12G178675
GO:0015986	ATP synthesis coupled proton transport	biological_process	24	3079	111	36612	2.57099971033066	1.4199073714023e-05	0.000698945790239612	Gohir.1Z049478/Gohir.1Z049699/Gohir.1Z049799/Gohir.1Z049992/Gohir.1Z050092/Gohir.A03G085501/Gohir.A05G086000/Gohir.A05G314033/Gohir.A07G129651/Gohir.A09G102400/Gohir.A09G103000/Gohir.A10G065880/Gohir.A10G088001/Gohir.A11G101333/Gohir.A11G101400/Gohir.A12G091244/Gohir.A12G091266/Gohir.A12G094100/Gohir.A13G095800/Gohir.D01G102281/Gohir.D01G158000/Gohir.D06G053900/Gohir.D07G024400/Gohir.D07G155064
GO:0003899	DNA-directed 5'-3' RNA polymerase activity	molecular_function	22	3079	97	36612	2.69689918068191	1.43912483309461e-05	0.000698945790239612	Gohir.A03G019466/Gohir.A03G092501/Gohir.A04G054932/Gohir.A04G065185/Gohir.A04G065470/Gohir.A05G086066/Gohir.A05G326924/Gohir.A06G164401/Gohir.A07G155805/Gohir.A08G082700/Gohir.A11G180662/Gohir.A12G025100/Gohir.D01G029500/Gohir.D01G102099/Gohir.D01G206650/Gohir.D03G070500/Gohir.D06G063650/Gohir.D07G215200/Gohir.D07G215250/Gohir.D08G095620/Gohir.D08G145550/Gohir.D11G233540
GO:0045263	proton-transporting ATP synthase complex, coupling factor F(o)	cellular_component	9	3079	20	36612	5.35089314712569	1.480120496978e-05	0.000698945790239612	Gohir.A03G085501/Gohir.A05G086000/Gohir.A05G314033/Gohir.A07G129651/Gohir.A10G065880/Gohir.A11G101400/Gohir.A13G095800/Gohir.D01G158000/Gohir.D07G024400
GO:0009772	photosynthetic electron transport in photosystem II	biological_process	9	3079	21	36612	5.09608871154828	2.39651997568332e-05	0.00107212735754254	Gohir.1Z050192/Gohir.1Z078801/Gohir.A01G134066/Gohir.A04G039105/Gohir.A08G102600/Gohir.D01G102034/Gohir.D06G072250/Gohir.D08G127100/Gohir.D08G127760
GO:0015935	small ribosomal subunit	cellular_component	22	3079	106	36612	2.46791717477495	6.13956950259353e-05	0.00260931703860225	Gohir.A01G128801/Gohir.A01G134033/Gohir.A01G136200/Gohir.A01G143838/Gohir.A04G039361/Gohir.A04G039400/Gohir.A05G086033/Gohir.A05G323772/Gohir.A05G323788/Gohir.A07G163636/Gohir.A08G157500/Gohir.A09G045446/Gohir.A09G045600/Gohir.A09G103300/Gohir.A10G100366/Gohir.A10G114000/Gohir.A12G089750/Gohir.A12G232200/Gohir.A13G086470/Gohir.D04G096628/Gohir.D08G077750/Gohir.D13G098100
GO:0006412	translation	biological_process	120	3079	1014	36612	1.40720398346501	9.10931104888336e-05	0.00368710209121469	Gohir.1Z049534/Gohir.1Z049594/Gohir.1Z049834/Gohir.1Z049902/Gohir.1Z049931/Gohir.1Z049934/Gohir.1Z050034/Gohir.1Z050134/Gohir.1Z050234/Gohir.1Z050292/Gohir.1Z050480/Gohir.A01G064960/Gohir.A01G071550/Gohir.A01G073000/Gohir.A01G128801/Gohir.A01G134033/Gohir.A01G136200/Gohir.A01G139101/Gohir.A01G140300/Gohir.A01G140394/Gohir.A01G143838/Gohir.A03G092800/Gohir.A03G094200/Gohir.A03G135500/Gohir.A04G035…
GO:0009055	electron transfer activity	molecular_function	47	3079	321	36612	1.74103134589759	0.000140028956087909	0.00541020966703285	Gohir.1Z049502/Gohir.1Z049578/Gohir.1Z050280/Gohir.1Z078400/Gohir.1Z078501/Gohir.A01G104300/Gohir.A01G137760/Gohir.A03G092600/Gohir.A03G110600/Gohir.A03G137700/Gohir.A04G039105/Gohir.A04G055500/Gohir.A05G086325/Gohir.A05G142175/Gohir.A07G130966/Gohir.A07G145200/Gohir.A07G170100/Gohir.A07G231600/Gohir.A08G102600/Gohir.A08G116700/Gohir.A09G017925/Gohir.A09G046200/Gohir.A09G101675/Gohir.A09G103166/G…
GO:0009522	photosystem I	cellular_component	12	3079	43	36612	3.31838334705469	0.000158396327433781	0.00585377731820494	Gohir.1Z049999/Gohir.A07G163663/Gohir.A07G163672/Gohir.A07G163690/Gohir.A07G166934/Gohir.A09G017925/Gohir.A09G046200/Gohir.A11G226800/Gohir.A12G229532/Gohir.D01G102333/Gohir.D06G120350/Gohir.D11G230800
GO:0003677	DNA binding	molecular_function	296	3079	2905	36612	1.21160020772553	0.000250889969165457	0.00862160566167557	Gohir.A01G097000/Gohir.A01G115100/Gohir.A01G122400/Gohir.A01G128300/Gohir.A01G132100/Gohir.A01G136700/Gohir.A01G144100/Gohir.A01G154600/Gohir.A01G182500/Gohir.A01G204800/Gohir.A03G006800/Gohir.A03G010100/Gohir.A03G019466/Gohir.A03G033200/Gohir.A03G035500/Gohir.A03G070300/Gohir.A03G071300/Gohir.A03G074032/Gohir.A03G076000/Gohir.A03G092501/Gohir.A03G096500/Gohir.A03G096800/Gohir.A03G100900/Gohir.A0…
GO:0045261	proton-transporting ATP synthase complex, catalytic core F(1)	cellular_component	12	3079	45	36612	3.17089964274115	0.000253576637108105	0.00862160566167557	Gohir.1Z049699/Gohir.1Z049799/Gohir.1Z050092/Gohir.A09G102400/Gohir.A09G103000/Gohir.A10G088001/Gohir.A11G101333/Gohir.A12G091244/Gohir.A12G091266/Gohir.D01G102281/Gohir.D06G053900/Gohir.D07G155064
GO:0009512	cytochrome b6f complex	cellular_component	10	3079	33	36612	3.60329504856949	0.000264868927175022	0.00865917646533727	Gohir.1Z049502/Gohir.1Z049578/Gohir.1Z050280/Gohir.1Z050380/Gohir.A04G039165/Gohir.A11G221002/Gohir.A12G071400/Gohir.A13G074350/Gohir.D01G101956/Gohir.D01G101969
GO:0046933	proton-transporting ATP synthase activity, rotational mechanism	molecular_function	13	3079	52	36612	2.97271841506983	0.000285715552022616	0.00899474885997124	Gohir.1Z049699/Gohir.1Z049799/Gohir.1Z050092/Gohir.A09G102400/Gohir.A09G103000/Gohir.A10G088001/Gohir.A11G101333/Gohir.A12G091244/Gohir.A12G091266/Gohir.A12G094100/Gohir.D01G102281/Gohir.D06G053900/Gohir.D07G155064
GO:0071586	CAAX-box protein processing	biological_process	8	3079	23	36612	4.13595605574933	0.000383778138100653	0.0112119774287044	Gohir.A04G063700/Gohir.A05G311600/Gohir.A08G113000/Gohir.A11G091500/Gohir.A13G099905/Gohir.D03G079700/Gohir.D11G023100/Gohir.D13G066100
GO:0042549	photosystem II stabilization	biological_process	5	3079	9	36612	6.6060409223774	0.000395734618471586	0.0112119774287044	Gohir.1Z049880/Gohir.A05G086100/Gohir.A12G076900/Gohir.D06G164048/Gohir.D08G128420
GO:0042301	phosphate ion binding	molecular_function	7	3079	18	36612	4.62422864566418	0.000408907412105692	0.0112119774287044	Gohir.1Z078601/Gohir.A01G128325/Gohir.A03G093700/Gohir.A10G070250/Gohir.A12G228900/Gohir.A13G110000/Gohir.D01G102060
GO:0050821	protein stabilization	biological_process	7	3079	18	36612	4.62422864566418	0.000408907412105692	0.0112119774287044	Gohir.1Z078601/Gohir.A01G128325/Gohir.A03G093700/Gohir.A10G070250/Gohir.A12G228900/Gohir.A13G110000/Gohir.D01G102060
GO:0048038	quinone binding	molecular_function	9	3079	30	36612	3.56726209808379	0.000581590165834162	0.0154484887799699	Gohir.1Z049499/Gohir.1Z049694/Gohir.A03G134205/Gohir.A09G102200/Gohir.A12G144700/Gohir.A13G086335/Gohir.D07G155032/Gohir.D08G108108/Gohir.D11G334151
GO:0006351	transcription, DNA-templated	biological_process	39	3079	273	36612	1.69869623718276	0.000798076786893736	0.020556523298778	Gohir.A03G019466/Gohir.A03G092501/Gohir.A03G116700/Gohir.A04G053800/Gohir.A04G054932/Gohir.A04G065185/Gohir.A04G065470/Gohir.A04G082600/Gohir.A04G095200/Gohir.A05G082000/Gohir.A05G086066/Gohir.A05G326924/Gohir.A06G113000/Gohir.A06G119302/Gohir.A06G164401/Gohir.A07G155805/Gohir.A08G082700/Gohir.A08G124200/Gohir.A10G086300/Gohir.A10G153500/Gohir.A11G180662/Gohir.A11G205450/Gohir.A12G025100/Gohir.A1…
GO:0003735	structural constituent of ribosome	molecular_function	118	3079	1052	36612	1.33376719763589	0.000824032680202741	0.0206008170050685	Gohir.1Z049534/Gohir.1Z049594/Gohir.1Z049834/Gohir.1Z049902/Gohir.1Z049931/Gohir.1Z049934/Gohir.1Z050034/Gohir.1Z050134/Gohir.1Z050234/Gohir.1Z050292/Gohir.1Z050480/Gohir.A01G064960/Gohir.A01G071550/Gohir.A01G073000/Gohir.A01G128801/Gohir.A01G134033/Gohir.A01G136200/Gohir.A01G139101/Gohir.A01G140300/Gohir.A01G140394/Gohir.A01G143838/Gohir.A03G092800/Gohir.A03G094200/Gohir.A03G135500/Gohir.A04G035…
GO:0016020	membrane	cellular_component	205	3079	1987	36612	1.22678867657638	0.00123261244426801	0.029583593504181	Gohir.1Z049380/Gohir.1Z049449/Gohir.1Z049694/Gohir.1Z049702/Gohir.1Z049980/Gohir.1Z050080/Gohir.1Z050692/Gohir.1Z078400/Gohir.1Z078501/Gohir.1Z078601/Gohir.1Z078701/Gohir.1Z078801/Gohir.A01G104300/Gohir.A01G128325/Gohir.A01G137450/Gohir.A01G137760/Gohir.A01G139542/Gohir.A01G140181/Gohir.A01G150018/Gohir.A01G151436/Gohir.A01G158900/Gohir.A01G163100/Gohir.A03G032100/Gohir.A03G038500/Gohir.A03G07580…
GO:0019843	rRNA binding	molecular_function	12	3079	53	36612	2.69227328157267	0.0012529521954712	0.029583593504181	Gohir.1Z049902/Gohir.1Z049934/Gohir.A08G157500/Gohir.A09G045300/Gohir.A09G103300/Gohir.A12G024600/Gohir.A12G229400/Gohir.A13G113500/Gohir.D01G101995/Gohir.D01G102151/Gohir.D09G044333/Gohir.D13G088300
GO:0016984	ribulose-bisphosphate carboxylase activity	molecular_function	4	3079	7	36612	6.79478494873104	0.00141933969186972	0.0326064523807908	Gohir.1Z049899/Gohir.A07G163645/Gohir.D01G102320/Gohir.D07G185900
GO:0055114	oxidation-reduction process	biological_process	263	3079	2652	36612	1.17922314202619	0.00247686542003431	0.0554035686060306	Gohir.1Z049361/Gohir.1Z049399/Gohir.1Z049402/Gohir.1Z049431/Gohir.1Z049499/Gohir.1Z049531/Gohir.1Z049547/Gohir.1Z049581/Gohir.1Z049599/Gohir.1Z049679/Gohir.1Z049694/Gohir.1Z049702/Gohir.1Z049731/Gohir.1Z057300/Gohir.A01G039800/Gohir.A01G088700/Gohir.A01G094950/Gohir.A01G102000/Gohir.A01G112200/Gohir.A01G115800/Gohir.A01G126300/Gohir.A01G135800/Gohir.A01G137539/Gohir.A01G137617/Gohir.A01G137630/Go…
GO:0016740	transferase activity	molecular_function	7	3079	24	36612	3.46817148424813	0.00283853930774643	0.0618656002970375	Gohir.1Z049534/Gohir.1Z050292/Gohir.A04G039090/Gohir.A09G093051/Gohir.A12G024300/Gohir.A12G089375/Gohir.D07G225200
GO:0046983	protein dimerization activity	molecular_function	83	3079	729	36612	1.35383060878352	0.00302103327260672	0.0629222401546885	Gohir.A01G122633/Gohir.A01G122666/Gohir.A01G132100/Gohir.A01G151490/Gohir.A01G179100/Gohir.A03G071300/Gohir.A03G074032/Gohir.A03G096500/Gohir.A03G124900/Gohir.A04G081400/Gohir.A05G132075/Gohir.A05G299200/Gohir.A05G305100/Gohir.A05G326924/Gohir.A05G330901/Gohir.A06G083700/Gohir.A06G113000/Gohir.A06G119302/Gohir.A06G150966/Gohir.A07G076900/Gohir.A07G160400/Gohir.A07G170500/Gohir.A08G062100/Gohir.A0…
GO:0004097	catechol oxidase activity	molecular_function	5	3079	13	36612	4.57341294626127	0.00303507276040262	0.0629222401546885	Gohir.A06G125800/Gohir.A06G125904/Gohir.A09G071700/Gohir.D06G181900/Gohir.D06G211300
GO:0004197	cysteine-type endopeptidase activity	molecular_function	6	3079	19	36612	3.75501273482505	0.00365647079802901	0.0740000042458251	Gohir.A04G063700/Gohir.A05G311600/Gohir.A08G113000/Gohir.D03G079700/Gohir.D11G023100/Gohir.D13G066100
GO:0046034	ATP metabolic process	biological_process	7	3079	26	36612	3.20138906238289	0.00464946263975378	0.0919079824137375	Gohir.1Z049799/Gohir.1Z050092/Gohir.A01G109000/Gohir.A05G345878/Gohir.A09G102400/Gohir.D01G102307/Gohir.D06G053900
GO:0033177	proton-transporting two-sector ATPase complex, proton-transporting domain	cellular_component	6	3079	20	36612	3.56726209808379	0.00485615312856762	0.0938120490746018	Gohir.A13G086625/Gohir.A13G095800/Gohir.D01G158000/Gohir.D03G064500/Gohir.D07G024400/Gohir.D11G184900
GO:0005802	trans-Golgi network	cellular_component	3	3079	5	36612	7.13452419616759	0.00521872604719906	0.094381215747217	Gohir.A07G174400/Gohir.A08G093462/Gohir.D07G181700
GO:0032367	intracellular cholesterol transport	biological_process	3	3079	5	36612	7.13452419616759	0.00521872604719906	0.094381215747217	Gohir.A07G174400/Gohir.A08G093462/Gohir.D07G181700
GO:0046577	long-chain-alcohol oxidase activity	molecular_function	3	3079	5	36612	7.13452419616759	0.00521872604719906	0.094381215747217	Gohir.A07G150400/Gohir.A10G109550/Gohir.D07G156800
GO:0031361	integral component of thylakoid membrane	cellular_component	4	3079	10	36612	4.75634946411172	0.00693027656009053	0.12272364741827	Gohir.A05G086325/Gohir.A09G101675/Gohir.A09G103166/Gohir.D01G101891
GO:1902600	proton transmembrane transport	biological_process	17	3079	106	36612	1.90702690778064	0.00723059414509424	0.124356180485625	Gohir.1Z049799/Gohir.1Z050092/Gohir.A01G109000/Gohir.A01G113400/Gohir.A05G345878/Gohir.A06G116100/Gohir.A09G102400/Gohir.A13G086625/Gohir.A13G095800/Gohir.D01G102307/Gohir.D01G158000/Gohir.D03G064500/Gohir.D06G053900/Gohir.D06G120900/Gohir.D07G024400/Gohir.D11G184900/Gohir.D13G115033
GO:0015934	large ribosomal subunit	cellular_component	14	3079	81	36612	2.0552127314063	0.0073150694403309	0.124356180485625	Gohir.1Z049534/Gohir.1Z049931/Gohir.1Z050034/Gohir.1Z050292/Gohir.A03G094200/Gohir.A03G135500/Gohir.A04G039090/Gohir.A07G047800/Gohir.A09G093051/Gohir.A12G024300/Gohir.A12G089375/Gohir.A12G229600/Gohir.D01G154600/Gohir.D08G057400
GO:0006355	regulation of transcription, DNA-templated	biological_process	212	3079	2154	36612	1.17031811326797	0.00855029995761731	0.142504999293622	Gohir.A01G082400/Gohir.A01G122150/Gohir.A01G122400/Gohir.A01G122700/Gohir.A01G132100/Gohir.A01G136700/Gohir.A01G154000/Gohir.A01G204800/Gohir.A03G006800/Gohir.A03G010100/Gohir.A03G017604/Gohir.A03G035500/Gohir.A03G071300/Gohir.A03G076400/Gohir.A03G077700/Gohir.A03G078424/Gohir.A03G096800/Gohir.A03G102000/Gohir.A03G116600/Gohir.A03G124900/Gohir.A03G144200/Gohir.A03G171400/Gohir.A04G048200/Gohir.A0…
GO:0003700	DNA-binding transcription factor activity	molecular_function	121	3079	1165	36612	1.23501777930798	0.00924034894780183	0.151044165492915	Gohir.A01G082400/Gohir.A01G122400/Gohir.A01G122700/Gohir.A01G132100/Gohir.A01G154000/Gohir.A03G006800/Gohir.A03G035500/Gohir.A03G071300/Gohir.A03G076400/Gohir.A03G077700/Gohir.A03G078424/Gohir.A03G096800/Gohir.A03G116700/Gohir.A03G124900/Gohir.A04G048200/Gohir.A04G052600/Gohir.A04G065414/Gohir.A04G072600/Gohir.A04G077300/Gohir.A04G095200/Gohir.A05G110300/Gohir.A05G138300/Gohir.A05G244600/Gohir.A0…
GO:0003839	gamma-glutamylcyclotransferase activity	molecular_function	3	3079	6	36612	5.94543683013966	0.00978562487570059	0.156939266874443	Gohir.A06G043400/Gohir.A06G107600/Gohir.D06G109900
GO:0045492	xylan biosynthetic process	biological_process	7	3079	30	36612	2.77453718739851	0.0107038809055205	0.166786279251609	Gohir.A01G160400/Gohir.A03G125800/Gohir.A05G276000/Gohir.A10G082400/Gohir.D03G061300/Gohir.D05G271700/Gohir.D11G202000
GO:0004482	mRNA (guanine-N7-)-methyltransferase activity	molecular_function	5	3079	17	36612	3.49731578243509	0.0109882725154001	0.166786279251609	Gohir.A08G081062/Gohir.D03G068501/Gohir.D06G134001/Gohir.D07G146901/Gohir.D08G110908
GO:0017004	cytochrome complex assembly	biological_process	5	3079	17	36612	3.49731578243509	0.0109882725154001	0.166786279251609	Gohir.1Z049831/Gohir.A10G117233/Gohir.A13G092605/Gohir.D03G077700/Gohir.D08G145250
GO:0006851	mitochondrial calcium ion transmembrane transport	biological_process	3	3079	7	36612	5.09608871154828	0.0160603387635737	0.231377761848096	Gohir.A08G091200/Gohir.D06G101800/Gohir.D08G101700
GO:0008757	S-adenosylmethionine-dependent methyltransferase activity	molecular_function	3	3079	7	36612	5.09608871154828	0.0160603387635737	0.231377761848096	Gohir.A06G114200/Gohir.A13G131500/Gohir.D06G118700
GO:0016628	oxidoreductase activity, acting on the CH-CH group of donors, NAD or NADP as acceptor	molecular_function	3	3079	7	36612	5.09608871154828	0.0160603387635737	0.231377761848096	Gohir.A03G067100/Gohir.A09G105100/Gohir.D03G093600
GO:0072488	ammonium transmembrane transport	biological_process	4	3079	13	36612	3.65873035700902	0.0192421245151598	0.272596763964764	Gohir.A04G094400/Gohir.A10G106700/Gohir.A11G244300/Gohir.D11G254500
GO:0006826	iron ion transport	biological_process	3	3079	8	36612	4.45907762260474	0.0241067486727419	0.320167755809853	Gohir.A04G095070/Gohir.A05G304500/Gohir.D04G135050
GO:0006879	cellular iron ion homeostasis	biological_process	3	3079	8	36612	4.45907762260474	0.0241067486727419	0.320167755809853	Gohir.A04G095070/Gohir.A05G304500/Gohir.D04G135050
GO:0016485	protein processing	biological_process	3	3079	8	36612	4.45907762260474	0.0241067486727419	0.320167755809853	Gohir.A06G129500/Gohir.A11G224200/Gohir.D11G238500
GO:0046148	pigment biosynthetic process	biological_process	3	3079	8	36612	4.45907762260474	0.0241067486727419	0.320167755809853	Gohir.A06G125800/Gohir.A06G125904/Gohir.D06G211300
GO:0004332	fructose-bisphosphate aldolase activity	molecular_function	4	3079	14	36612	3.39739247436552	0.0251802671204383	0.324291318975342	Gohir.A04G065600/Gohir.A04G065642/Gohir.A13G030500/Gohir.D04G103800
GO:0017022	myosin binding	molecular_function	4	3079	14	36612	3.39739247436552	0.0251802671204383	0.324291318975342	Gohir.A01G150000/Gohir.A03G119100/Gohir.A07G173600/Gohir.D07G179900
GO:0008519	ammonium transmembrane transporter activity	molecular_function	5	3079	21	36612	2.8311603953046	0.027290673687541	0.336189458469708	Gohir.A04G094400/Gohir.A10G106700/Gohir.A11G244300/Gohir.D08G071950/Gohir.D11G254500
GO:0009317	acetyl-CoA carboxylase complex	cellular_component	5	3079	21	36612	2.8311603953046	0.027290673687541	0.336189458469708	Gohir.1Z049999/Gohir.A07G163654/Gohir.A07G167012/Gohir.A09G101966/Gohir.D01G102333
GO:0015696	ammonium transport	biological_process	5	3079	21	36612	2.8311603953046	0.027290673687541	0.336189458469708	Gohir.A04G094400/Gohir.A10G106700/Gohir.A11G244300/Gohir.D08G071950/Gohir.D11G254500
GO:0005840	ribosome	cellular_component	95	3079	933	36612	1.2107534809502	0.0301748130041583	0.366408443621922	Gohir.1Z049534/Gohir.1Z049594/Gohir.1Z049902/Gohir.1Z049934/Gohir.1Z050034/Gohir.1Z050134/Gohir.1Z050234/Gohir.1Z050292/Gohir.1Z050480/Gohir.A01G064960/Gohir.A01G071550/Gohir.A01G073000/Gohir.A01G128801/Gohir.A01G134033/Gohir.A01G139101/Gohir.A01G140300/Gohir.A01G140394/Gohir.A01G143838/Gohir.A03G092800/Gohir.A03G094200/Gohir.A04G035600/Gohir.A04G039075/Gohir.A04G039090/Gohir.A04G039361/Gohir.A04…
GO:0032549	ribonucleoside binding	molecular_function	5	3079	22	36612	2.70247128642712	0.0329399835280918	0.389779294703806	Gohir.A04G065185/Gohir.A04G065470/Gohir.A07G155805/Gohir.D01G029500/Gohir.D08G095620
GO:0008199	ferric iron binding	molecular_function	3	3079	9	36612	3.96362455342644	0.0339337268330372	0.389779294703806	Gohir.A04G095070/Gohir.A05G304500/Gohir.D04G135050
GO:0009834	plant-type secondary cell wall biogenesis	biological_process	3	3079	9	36612	3.96362455342644	0.0339337268330372	0.389779294703806	Gohir.A10G082400/Gohir.D03G061300/Gohir.D05G271700
GO:0015020	glucuronosyltransferase activity	molecular_function	3	3079	9	36612	3.96362455342644	0.0339337268330372	0.389779294703806	Gohir.A10G082400/Gohir.D03G061300/Gohir.D05G271700
GO:0005777	peroxisome	cellular_component	7	3079	38	36612	2.19042409531461	0.0369540363001358	0.418812411401539	Gohir.A06G129500/Gohir.A07G157900/Gohir.A10G085600/Gohir.A11G200400/Gohir.A11G223950/Gohir.D11G223300/Gohir.D11G226360
GO:0000030	mannosyltransferase activity	molecular_function	4	3079	16	36612	2.97271841506983	0.0400291199301855	0.441075887311103	Gohir.A07G160600/Gohir.A11G220400/Gohir.D11G203050/Gohir.D11G203200
GO:0022904	respiratory electron transport chain	biological_process	4	3079	16	36612	2.97271841506983	0.0400291199301855	0.441075887311103	Gohir.1Z078501/Gohir.A01G104300/Gohir.A12G228775/Gohir.D01G102073
GO:0020037	heme binding	molecular_function	85	3079	837	36612	1.20755586753135	0.0404751990709012	0.441075887311103	Gohir.1Z049361/Gohir.1Z049547/Gohir.1Z049831/Gohir.1Z050180/Gohir.A01G088700/Gohir.A01G094950/Gohir.A01G142201/Gohir.A01G142301/Gohir.A01G143600/Gohir.A01G207501/Gohir.A03G115300/Gohir.A04G046866/Gohir.A04G075400/Gohir.A05G086325/Gohir.A05G109400/Gohir.A05G198200/Gohir.A05G202500/Gohir.A05G262900/Gohir.A05G303900/Gohir.A06G014400/Gohir.A06G057900/Gohir.A06G098220/Gohir.A06G110300/Gohir.A06G111202…
GO:0008610	lipid biosynthetic process	biological_process	8	3079	48	36612	1.98181227671322	0.0453842974449034	0.488312061116049	Gohir.A03G100000/Gohir.A03G100100/Gohir.A03G100200/Gohir.A06G111000/Gohir.A06G119800/Gohir.A08G093500/Gohir.D06G164016/Gohir.D08G097300
GO:0016491	oxidoreductase activity	molecular_function	118	3079	1205	36612	1.16441750366221	0.0462981333039331	0.491917666354289	Gohir.1Z057300/Gohir.1Z078400/Gohir.1Z078501/Gohir.A01G039800/Gohir.A01G104300/Gohir.A01G126300/Gohir.A01G135800/Gohir.A01G137539/Gohir.A01G137760/Gohir.A01G145000/Gohir.A01G145438/Gohir.A01G193200/Gohir.A01G227000/Gohir.A03G044350/Gohir.A03G079900/Gohir.A03G085101/Gohir.A03G096300/Gohir.A03G100000/Gohir.A03G100100/Gohir.A03G100200/Gohir.A03G111100/Gohir.A03G137700/Gohir.A03G179900/Gohir.A04G0687…
GO:0015078	proton transmembrane transporter activity	molecular_function	13	3079	93	36612	1.66216513530786	0.0474557622422418	0.497992566739574	Gohir.A01G113400/Gohir.A03G085501/Gohir.A05G086000/Gohir.A05G314033/Gohir.A07G129651/Gohir.A10G065880/Gohir.A11G101400/Gohir.A13G086625/Gohir.A13G095800/Gohir.D01G158000/Gohir.D03G064500/Gohir.D07G024400/Gohir.D11G184900
GO:0015977	carbon fixation	biological_process	4	3079	17	36612	2.79785262594807	0.048964765288581	0.498162887770319	Gohir.1Z049899/Gohir.A07G163645/Gohir.D01G102320/Gohir.D07G185900
GO:0015995	chlorophyll biosynthetic process	biological_process	4	3079	17	36612	2.79785262594807	0.048964765288581	0.498162887770319	Gohir.A03G067100/Gohir.A09G105100/Gohir.D03G093600/Gohir.D07G051300
GO:0015297	antiporter activity	molecular_function	14	3079	103	36612	1.61623525479525	0.0498162887770319	0.498162887770319	Gohir.A03G108900/Gohir.A03G135900/Gohir.A05G169800/Gohir.A05G317500/Gohir.A07G074900/Gohir.A09G039800/Gohir.A10G087500/Gohir.A10G148100/Gohir.A11G203900/Gohir.A11G223900/Gohir.A11G224202/Gohir.D08G038900/Gohir.D08G165400/Gohir.D09G007100
GO:0042910	xenobiotic transmembrane transporter activity	molecular_function	14	3079	103	36612	1.61623525479525	0.0498162887770319	0.498162887770319	Gohir.A03G108900/Gohir.A03G135900/Gohir.A05G169800/Gohir.A05G317500/Gohir.A07G074900/Gohir.A09G039800/Gohir.A10G087500/Gohir.A10G148100/Gohir.A11G203900/Gohir.A11G223900/Gohir.A11G224202/Gohir.D08G038900/Gohir.D08G165400/Gohir.D09G007100
GO:0003989	acetyl-CoA carboxylase activity	molecular_function	5	3079	25	36612	2.37817473205586	0.0539859774012935	0.533582334780226	Gohir.1Z049999/Gohir.A07G163654/Gohir.A07G167012/Gohir.A09G101966/Gohir.D01G102333
GO:0016627	oxidoreductase activity, acting on the CH-CH group of donors	molecular_function	8	3079	50	36612	1.90253978564469	0.0557647881398191	0.544828389871796	Gohir.A03G093400/Gohir.A07G215000/Gohir.A10G085600/Gohir.A11G200400/Gohir.A11G232000/Gohir.D08G087700/Gohir.D11G223300/Gohir.D11G243200
GO:0003955	NAD(P)H dehydrogenase (quinone) activity	molecular_function	3	3079	11	36612	3.24296554371254	0.058757046938932	0.554927665534358	Gohir.A03G179900/Gohir.A11G186500/Gohir.D03G116900
GO:0031929	TOR signaling	biological_process	3	3079	11	36612	3.24296554371254	0.058757046938932	0.554927665534358	Gohir.1Z049390/Gohir.A06G137902/Gohir.A10G147600
GO:0031931	TORC1 complex	cellular_component	3	3079	11	36612	3.24296554371254	0.058757046938932	0.554927665534358	Gohir.1Z049390/Gohir.A06G137902/Gohir.A10G147600
GO:0032981	mitochondrial respiratory chain complex I assembly	biological_process	2	3079	5	36612	4.75634946411172	0.0595510189997359	0.556245781865665	Gohir.A01G137400/Gohir.D01G124600
GO:0007017	microtubule-based process	biological_process	13	3079	98	36612	1.5773607916697	0.0670266878466959	0.618695333211124	Gohir.A01G111100/Gohir.A03G078000/Gohir.A04G054932/Gohir.A06G108400/Gohir.A09G213150/Gohir.A10G165700/Gohir.A12G081465/Gohir.D01G097800/Gohir.D06G110500/Gohir.D08G105000/Gohir.D11G099800/Gohir.D11G253600/Gohir.D13G135450
GO:0018024	histone-lysine N-methyltransferase activity	molecular_function	6	3079	35	36612	2.03843548461931	0.0694120257997953	0.618695333211124	Gohir.1Z049449/Gohir.A03G060600/Gohir.A05G334400/Gohir.A06G111200/Gohir.D06G115100/Gohir.D09G059250
GO:0006694	steroid biosynthetic process	biological_process	4	3079	19	36612	2.5033418232167	0.0698276998556806	0.618695333211124	Gohir.A01G102000/Gohir.A05G255600/Gohir.A05G322600/Gohir.D06G080100
GO:0005506	iron ion binding	molecular_function	68	3079	676	36612	1.19612338594526	0.0708757166074021	0.618695333211124	Gohir.A01G088700/Gohir.A01G094950/Gohir.A01G207501/Gohir.A03G100000/Gohir.A03G100100/Gohir.A03G100200/Gohir.A03G115300/Gohir.A04G046866/Gohir.A05G086325/Gohir.A05G109400/Gohir.A05G198200/Gohir.A05G202500/Gohir.A05G262900/Gohir.A05G306101/Gohir.A06G014400/Gohir.A06G057900/Gohir.A06G110300/Gohir.A06G111000/Gohir.A06G119800/Gohir.A07G055700/Gohir.A07G092600/Gohir.A08G093500/Gohir.A08G110000/Gohir.A0…
GO:0016746	transferase activity, transferring acyl groups	molecular_function	11	3079	80	36612	1.63499512828841	0.0711427498857036	0.618695333211124	Gohir.A01G117200/Gohir.A01G164900/Gohir.A04G065628/Gohir.A04G089100/Gohir.A06G130506/Gohir.A09G031300/Gohir.A12G090800/Gohir.A13G109400/Gohir.D04G129300/Gohir.D11G093700/Gohir.D13G067700
GO:0016021	integral component of membrane	cellular_component	170	3079	1814	36612	1.11435971457965	0.0723200081126625	0.618695333211124	Gohir.1Z049492/Gohir.1Z049494/Gohir.1Z049780/Gohir.1Z049999/Gohir.1Z050180/Gohir.A01G097100/Gohir.A01G113300/Gohir.A01G131111/Gohir.A01G139613/Gohir.A01G140200/Gohir.A01G142401/Gohir.A01G144800/Gohir.A01G148518/Gohir.A01G151436/Gohir.A01G152000/Gohir.A01G156900/Gohir.A01G164900/Gohir.A01G182300/Gohir.A01G204050/Gohir.A03G032800/Gohir.A03G053800/Gohir.A03G072900/Gohir.A03G079000/Gohir.A03G096400/G…
GO:0003871	5-methyltetrahydropteroyltriglutamate-homocysteine S-methyltransferase activity	molecular_function	3	3079	12	36612	2.97271841506983	0.0735909494652927	0.618695333211124	Gohir.A13G097500/Gohir.D11G314900/Gohir.D13G102200
GO:0006751	glutathione catabolic process	biological_process	3	3079	12	36612	2.97271841506983	0.0735909494652927	0.618695333211124	Gohir.A06G043400/Gohir.A06G107600/Gohir.D06G109900
GO:0043622	cortical microtubule organization	biological_process	3	3079	12	36612	2.97271841506983	0.0735909494652927	0.618695333211124	Gohir.A03G070800/Gohir.A08G115200/Gohir.A13G083100
GO:0000287	magnesium ion binding	molecular_function	27	3079	240	36612	1.33772328678142	0.0745379726040361	0.618695333211124	Gohir.1Z049899/Gohir.A01G072700/Gohir.A01G142401/Gohir.A04G023400/Gohir.A04G044750/Gohir.A04G065755/Gohir.A05G285800/Gohir.A05G289800/Gohir.A05G358900/Gohir.A07G163645/Gohir.A07G163681/Gohir.A08G083100/Gohir.A08G096300/Gohir.A08G097100/Gohir.A09G030900/Gohir.A09G101500/Gohir.A09G166700/Gohir.D01G085000/Gohir.D01G102320/Gohir.D03G100000/Gohir.D07G185900/Gohir.D08G107600/Gohir.D09G007600/Gohir.D11G…
GO:0016887	ATPase activity	molecular_function	32	3079	292	36612	1.30310944222239	0.0747081871908413	0.618695333211124	Gohir.A01G131111/Gohir.A01G140465/Gohir.A03G091500/Gohir.A05G384700/Gohir.A07G144700/Gohir.A07G153100/Gohir.A08G090124/Gohir.A08G094300/Gohir.A08G114650/Gohir.A08G128900/Gohir.A09G112750/Gohir.A10G061375/Gohir.A11G134000/Gohir.A11G198000/Gohir.A11G201000/Gohir.A11G203700/Gohir.A11G203800/Gohir.A11G224800/Gohir.A12G045700/Gohir.A12G120300/Gohir.A12G173000/Gohir.A13G093300/Gohir.D01G099900/Gohir.D0…
GO:0005200	structural constituent of cytoskeleton	molecular_function	9	3079	63	36612	1.69869623718276	0.0799690860316786	0.618695333211124	Gohir.A01G111100/Gohir.A03G078000/Gohir.A06G108400/Gohir.A12G081465/Gohir.D01G097800/Gohir.D06G110500/Gohir.D08G105000/Gohir.D11G253600/Gohir.D13G135450
GO:0045927	positive regulation of growth	biological_process	5	3079	28	36612	2.12337029647845	0.0812753569572709	0.618695333211124	Gohir.A09G043500/Gohir.A13G092315/Gohir.D01G118900/Gohir.D06G185766/Gohir.D07G213700
GO:0004611	phosphoenolpyruvate carboxykinase activity	molecular_function	2	3079	6	36612	3.96362455342644	0.0844337160617534	0.618695333211124	Gohir.A11G209600/Gohir.D08G241300
GO:0004612	phosphoenolpyruvate carboxykinase (ATP) activity	molecular_function	2	3079	6	36612	3.96362455342644	0.0844337160617534	0.618695333211124	Gohir.A11G209600/Gohir.D08G241300
GO:0005471	ATP:ADP antiporter activity	molecular_function	2	3079	6	36612	3.96362455342644	0.0844337160617534	0.618695333211124	Gohir.A10G077800/Gohir.D03G065100
GO:0005664	nuclear origin of replication recognition complex	cellular_component	2	3079	6	36612	3.96362455342644	0.0844337160617534	0.618695333211124	Gohir.A01G134350/Gohir.A13G074000
GO:0006108	malate metabolic process	biological_process	2	3079	6	36612	3.96362455342644	0.0844337160617534	0.618695333211124	Gohir.A10G111200/Gohir.A12G096100
GO:0006862	nucleotide transport	biological_process	2	3079	6	36612	3.96362455342644	0.0844337160617534	0.618695333211124	Gohir.A10G077800/Gohir.D03G065100
GO:0007031	peroxisome organization	biological_process	2	3079	6	36612	3.96362455342644	0.0844337160617534	0.618695333211124	Gohir.A09G051300/Gohir.D08G140100
GO:0008686	3,4-dihydroxy-2-butanone-4-phosphate synthase activity	molecular_function	2	3079	6	36612	3.96362455342644	0.0844337160617534	0.618695333211124	Gohir.A10G087001/Gohir.D03G130200
GO:0016615	malate dehydrogenase activity	molecular_function	2	3079	6	36612	3.96362455342644	0.0844337160617534	0.618695333211124	Gohir.A10G111200/Gohir.A12G096100
GO:0017076	purine nucleotide binding	molecular_function	2	3079	6	36612	3.96362455342644	0.0844337160617534	0.618695333211124	Gohir.A11G209600/Gohir.D08G241300
GO:0048366	leaf development	biological_process	2	3079	6	36612	3.96362455342644	0.0844337160617534	0.618695333211124	Gohir.A11G214900/Gohir.A12G077400
GO:0071596	ubiquitin-dependent protein catabolic process via the N-end rule pathway	biological_process	2	3079	6	36612	3.96362455342644	0.0844337160617534	0.618695333211124	Gohir.A13G093100/Gohir.D13G098600
GO:0006952	defense response	biological_process	15	3079	122	36612	1.4619926631491	0.0879114174998723	0.634652396544101	Gohir.A01G033900/Gohir.A01G145854/Gohir.A01G146028/Gohir.A01G150800/Gohir.A03G115800/Gohir.A04G024704/Gohir.A04G109400/Gohir.A05G303900/Gohir.A05G375500/Gohir.A07G116900/Gohir.A07G172100/Gohir.A13G159700/Gohir.D06G174800/Gohir.D06G177008/Gohir.D07G178800
GO:0051539	4 iron, 4 sulfur cluster binding	molecular_function	7	3079	46	36612	1.80948077439033	0.0881046856378869	0.634652396544101	Gohir.1Z049499/Gohir.A09G017925/Gohir.A09G046200/Gohir.A09G046292/Gohir.A09G102200/Gohir.A12G147700/Gohir.D07G155032
GO:0005779	integral component of peroxisomal membrane	cellular_component	3	3079	13	36612	2.74404776775676	0.0898955969503326	0.64211140678809	Gohir.A09G051300/Gohir.A11G085200/Gohir.D08G140100
GO:0010333	terpene synthase activity	molecular_function	11	3079	84	36612	1.55713821741753	0.0934543463083744	0.661968286350985	Gohir.A01G072700/Gohir.A04G023400/Gohir.A04G044750/Gohir.A05G289800/Gohir.A09G030900/Gohir.D01G085000/Gohir.D09G007600/Gohir.D11G154633/Gohir.D11G293700/Gohir.D13G147000/Gohir.D13G147100
GO:0016853	isomerase activity	molecular_function	6	3079	38	36612	1.87750636741252	0.0956623008346884	0.672007898425497	Gohir.A07G149400/Gohir.A08G095500/Gohir.A09G020000/Gohir.A11G131450/Gohir.D09G019600/Gohir.D11G099000
GO:0005874	microtubule	cellular_component	12	3079	96	36612	1.48635920753491	0.107406891191787	0.742309429170871	Gohir.A01G111100/Gohir.A03G078000/Gohir.A06G108400/Gohir.A12G081465/Gohir.A12G087200/Gohir.D01G097800/Gohir.D03G089500/Gohir.D06G110500/Gohir.D08G105000/Gohir.D11G099800/Gohir.D11G253600/Gohir.D13G135450
GO:0010468	regulation of gene expression	biological_process	3	3079	14	36612	2.54804435577414	0.107545232358486	0.742309429170871	Gohir.A05G318900/Gohir.A11G223950/Gohir.D11G226360
GO:0005534	galactose binding	molecular_function	2	3079	7	36612	3.39739247436552	0.111783066981025	0.742309429170871	Gohir.A06G107500/Gohir.D06G109800
GO:0009555	pollen development	biological_process	2	3079	7	36612	3.39739247436552	0.111783066981025	0.742309429170871	Gohir.A11G196900/Gohir.A12G011900
GO:0009739	response to gibberellin	biological_process	2	3079	7	36612	3.39739247436552	0.111783066981025	0.742309429170871	Gohir.A13G217801/Gohir.D04G071500
GO:0016593	Cdc73/Paf1 complex	cellular_component	2	3079	7	36612	3.39739247436552	0.111783066981025	0.742309429170871	Gohir.D09G081300/Gohir.D13G091100
GO:0019318	hexose metabolic process	biological_process	2	3079	7	36612	3.39739247436552	0.111783066981025	0.742309429170871	Gohir.A09G020000/Gohir.D09G019600
GO:0030246	carbohydrate binding	molecular_function	24	3079	220	36612	1.29718621748502	0.114045491630265	0.751462541749806	Gohir.1Z049351/Gohir.A01G125900/Gohir.A03G028500/Gohir.A03G075800/Gohir.A04G084000/Gohir.A04G115500/Gohir.A06G072500/Gohir.A06G099200/Gohir.A08G095500/Gohir.A09G020000/Gohir.A10G126700/Gohir.A11G207940/Gohir.A11G207980/Gohir.A12G012200/Gohir.A12G081265/Gohir.A12G082900/Gohir.A12G083000/Gohir.A13G049966/Gohir.D01G178800/Gohir.D09G014600/Gohir.D09G019600/Gohir.D09G160100/Gohir.D11G099000/Gohir.D11G…
GO:0005337	nucleoside transmembrane transporter activity	molecular_function	4	3079	23	36612	2.06797802787466	0.122710262738922	0.793318026428034	Gohir.A05G312400/Gohir.A06G137000/Gohir.A13G083500/Gohir.D01G084600
GO:1901642	nucleoside transmembrane transport	biological_process	4	3079	23	36612	2.06797802787466	0.122710262738922	0.793318026428034	Gohir.A05G312400/Gohir.A06G137000/Gohir.A13G083500/Gohir.D01G084600
GO:0003854	3-beta-hydroxy-delta5-steroid dehydrogenase activity	molecular_function	3	3079	15	36612	2.37817473205586	0.126405814662913	0.793318026428034	Gohir.A01G102000/Gohir.A05G322600/Gohir.D06G080100
GO:0009734	auxin-activated signaling pathway	biological_process	3	3079	15	36612	2.37817473205586	0.126405814662913	0.793318026428034	Gohir.D06G074100/Gohir.D06G083800/Gohir.D13G084000
GO:0016868	intramolecular transferase activity, phosphotransferases	molecular_function	3	3079	15	36612	2.37817473205586	0.126405814662913	0.793318026428034	Gohir.A01G145500/Gohir.D01G142900/Gohir.D01G143800
GO:0030833	regulation of actin filament polymerization	biological_process	3	3079	15	36612	2.37817473205586	0.126405814662913	0.793318026428034	Gohir.A08G089300/Gohir.D08G100500/Gohir.D13G106101
GO:0015743	malate transport	biological_process	5	3079	32	36612	1.85794900941864	0.126930884228486	0.793318026428034	Gohir.A04G057900/Gohir.A07G113200/Gohir.A08G103400/Gohir.A08G158000/Gohir.D04G091300
GO:0004564	beta-fructofuranosidase activity	molecular_function	2	3079	8	36612	2.97271841506983	0.14100850641712	0.844065003201069	Gohir.D03G107700/Gohir.D09G190000
GO:0004575	sucrose alpha-glucosidase activity	molecular_function	2	3079	8	36612	2.97271841506983	0.14100850641712	0.844065003201069	Gohir.D03G107700/Gohir.D09G190000
GO:0043044	ATP-dependent chromatin remodeling	biological_process	2	3079	8	36612	2.97271841506983	0.14100850641712	0.844065003201069	Gohir.A07G141800/Gohir.A10G161000
GO:0071704	organic substance metabolic process	biological_process	2	3079	8	36612	2.97271841506983	0.14100850641712	0.844065003201069	Gohir.A01G145500/Gohir.D01G142900
GO:0097367	carbohydrate derivative binding	molecular_function	2	3079	8	36612	2.97271841506983	0.14100850641712	0.844065003201069	Gohir.A07G149400/Gohir.A11G131450
GO:1901135	carbohydrate derivative metabolic process	biological_process	2	3079	8	36612	2.97271841506983	0.14100850641712	0.844065003201069	Gohir.A07G149400/Gohir.A11G131450
GO:0003997	acyl-CoA oxidase activity	molecular_function	3	3079	16	36612	2.22953881130237	0.146338898062774	0.863805995509428	Gohir.A10G085600/Gohir.A11G200400/Gohir.D11G223300
GO:0080143	regulation of amino acid export	biological_process	3	3079	16	36612	2.22953881130237	0.146338898062774	0.863805995509428	Gohir.A03G072800/Gohir.A07G077666/Gohir.A07G178200
GO:0000148	1,3-beta-D-glucan synthase complex	cellular_component	4	3079	25	36612	1.90253978564469	0.153998873301171	0.89046967555099	Gohir.A04G147700/Gohir.A10G156100/Gohir.A10G156400/Gohir.D03G103400
GO:0003843	1,3-beta-D-glucan synthase activity	molecular_function	4	3079	25	36612	1.90253978564469	0.153998873301171	0.89046967555099	Gohir.A04G147700/Gohir.A10G156100/Gohir.A10G156400/Gohir.D03G103400
GO:0006075	(1->3)-beta-D-glucan biosynthetic process	biological_process	4	3079	25	36612	1.90253978564469	0.153998873301171	0.89046967555099	Gohir.A04G147700/Gohir.A10G156100/Gohir.A10G156400/Gohir.D03G103400
GO:0045892	negative regulation of transcription, DNA-templated	biological_process	8	3079	63	36612	1.50995221082912	0.157237549718159	0.90269106858316	Gohir.A04G061400/Gohir.A05G195100/Gohir.A06G151600/Gohir.A09G056300/Gohir.A09G136900/Gohir.D01G192700/Gohir.D06G061200/Gohir.D08G141300
GO:0016760	cellulose synthase (UDP-forming) activity	molecular_function	9	3079	73	36612	1.46599812250019	0.158236434375166	0.90269106858316	Gohir.A06G111500/Gohir.A09G223800/Gohir.A10G115800/Gohir.A11G218600/Gohir.A11G235100/Gohir.A12G091622/Gohir.A12G091644/Gohir.D01G077000/Gohir.D04G151200
GO:0071949	FAD binding	molecular_function	15	3079	135	36612	1.32120818447548	0.163065268557654	0.924036521826705	Gohir.A03G067100/Gohir.A04G059826/Gohir.A06G081700/Gohir.A06G122200/Gohir.A09G105100/Gohir.A10G085600/Gohir.A10G130300/Gohir.A11G200400/Gohir.A12G115850/Gohir.A13G122300/Gohir.D03G093600/Gohir.D04G088700/Gohir.D06G071500/Gohir.D06G122600/Gohir.D11G223300
GO:0005634	nucleus	cellular_component	80	3079	854	36612	1.11389917192312	0.168559827205255	0.947150035690912	Gohir.1Z049449/Gohir.A01G051100/Gohir.A01G128300/Gohir.A01G132100/Gohir.A01G136700/Gohir.A01G150200/Gohir.A01G154600/Gohir.A03G060600/Gohir.A03G066100/Gohir.A03G070300/Gohir.A03G071300/Gohir.A03G124900/Gohir.A04G025700/Gohir.A04G053800/Gohir.A04G062201/Gohir.A04G082600/Gohir.A05G082000/Gohir.A05G313500/Gohir.A05G316301/Gohir.A05G334400/Gohir.A05G401200/Gohir.A06G027200/Gohir.A06G078900/Gohir.A06G…
GO:0004096	catalase activity	molecular_function	2	3079	9	36612	2.64241636895096	0.171601300584001	0.947150035690912	Gohir.A11G200200/Gohir.A12G197500
GO:0006368	transcription elongation from RNA polymerase II promoter	biological_process	2	3079	9	36612	2.64241636895096	0.171601300584001	0.947150035690912	Gohir.D09G081300/Gohir.D13G091100
GO:0016570	histone modification	biological_process	2	3079	9	36612	2.64241636895096	0.171601300584001	0.947150035690912	Gohir.D09G081300/Gohir.D13G091100
GO:0006633	fatty acid biosynthetic process	biological_process	14	3079	126	36612	1.32120818447548	0.173236593339199	0.950007124763349	Gohir.1Z049999/Gohir.A06G079000/Gohir.A07G163654/Gohir.A07G167012/Gohir.A08G123200/Gohir.A09G101966/Gohir.A10G085700/Gohir.A10G118600/Gohir.A12G115800/Gohir.A13G078866/Gohir.D01G059800/Gohir.D01G102333/Gohir.D06G080532/Gohir.D13G105200
GO:0046274	lignin catabolic process	biological_process	9	3079	76	36612	1.40812977555939	0.187097027538395	0.951788836620176	Gohir.A03G044350/Gohir.A05G099400/Gohir.A06G109600/Gohir.D03G118100/Gohir.D04G126700/Gohir.D04G128900/Gohir.D06G166700/Gohir.D13G019300/Gohir.D13G085400
GO:0052716	hydroquinone:oxygen oxidoreductase activity	molecular_function	9	3079	76	36612	1.40812977555939	0.187097027538395	0.951788836620176	Gohir.A03G044350/Gohir.A05G099400/Gohir.A06G109600/Gohir.D03G118100/Gohir.D04G126700/Gohir.D04G128900/Gohir.D06G166700/Gohir.D13G019300/Gohir.D13G085400
GO:0030570	pectate lyase activity	molecular_function	4	3079	27	36612	1.76161091263397	0.187900584513903	0.951788836620176	Gohir.A05G312001/Gohir.A09G021600/Gohir.A13G052200/Gohir.D09G021000
GO:0006635	fatty acid beta-oxidation	biological_process	3	3079	18	36612	1.98181227671322	0.188865049681013	0.951788836620176	Gohir.A10G085600/Gohir.A11G200400/Gohir.D11G223300
GO:0008173	RNA methyltransferase activity	molecular_function	3	3079	18	36612	1.98181227671322	0.188865049681013	0.951788836620176	Gohir.A06G119600/Gohir.A11G207400/Gohir.A12G212800
GO:0009678	pyrophosphate hydrolysis-driven proton transmembrane transporter activity	molecular_function	3	3079	18	36612	1.98181227671322	0.188865049681013	0.951788836620176	Gohir.A06G116100/Gohir.D06G120900/Gohir.D13G115033
GO:0016114	terpenoid biosynthetic process	biological_process	3	3079	18	36612	1.98181227671322	0.188865049681013	0.951788836620176	Gohir.A08G090186/Gohir.A08G114400/Gohir.D08G103801
GO:0031072	heat shock protein binding	molecular_function	3	3079	18	36612	1.98181227671322	0.188865049681013	0.951788836620176	Gohir.A06G113200/Gohir.A08G053500/Gohir.D08G063000
GO:0008171	O-methyltransferase activity	molecular_function	8	3079	67	36612	1.4198058101826	0.199358897775415	0.951788836620176	Gohir.A06G119600/Gohir.A07G160400/Gohir.A08G105100/Gohir.A10G101110/Gohir.A12G035600/Gohir.D04G107400/Gohir.D07G168200/Gohir.D13G167600
GO:0006281	DNA repair	biological_process	19	3079	183	36612	1.23457158221479	0.199715062660427	0.951788836620176	Gohir.A01G128300/Gohir.A03G070300/Gohir.A03G121000/Gohir.A05G245600/Gohir.A05G317471/Gohir.A06G107000/Gohir.A06G112800/Gohir.A07G004100/Gohir.A07G185533/Gohir.A08G110701/Gohir.A08G135700/Gohir.A09G227600/Gohir.A13G120700/Gohir.D01G132600/Gohir.D03G074900/Gohir.D08G141300/Gohir.D09G062000/Gohir.D11G222214/Gohir.D13G124700
GO:0003830	beta-1,4-mannosylglycoprotein 4-beta-N-acetylglucosaminyltransferase activity	molecular_function	2	3079	10	36612	2.37817473205586	0.203124967206783	0.951788836620176	Gohir.A01G158900/Gohir.D01G151500
GO:0004834	tryptophan synthase activity	molecular_function	2	3079	10	36612	2.37817473205586	0.203124967206783	0.951788836620176	Gohir.A06G146500/Gohir.D13G144200
GO:0005315	inorganic phosphate transmembrane transporter activity	molecular_function	2	3079	10	36612	2.37817473205586	0.203124967206783	0.951788836620176	Gohir.A07G177600/Gohir.A09G058400
GO:0006817	phosphate ion transport	biological_process	2	3079	10	36612	2.37817473205586	0.203124967206783	0.951788836620176	Gohir.A07G177600/Gohir.A09G058400
GO:0006997	nucleus organization	biological_process	2	3079	10	36612	2.37817473205586	0.203124967206783	0.951788836620176	Gohir.A07G164400/Gohir.A11G211100
GO:0007166	cell surface receptor signaling pathway	biological_process	2	3079	10	36612	2.37817473205586	0.203124967206783	0.951788836620176	Gohir.D01G091500/Gohir.D07G101600
GO:0008661	1-deoxy-D-xylulose-5-phosphate synthase activity	molecular_function	2	3079	10	36612	2.37817473205586	0.203124967206783	0.951788836620176	Gohir.A08G090186/Gohir.D08G103801
GO:0009881	photoreceptor activity	molecular_function	2	3079	10	36612	2.37817473205586	0.203124967206783	0.951788836620176	Gohir.A10G068120/Gohir.A11G261900
GO:0043169	cation binding	molecular_function	2	3079	10	36612	2.37817473205586	0.203124967206783	0.951788836620176	Gohir.A04G065400/Gohir.A05G202200
GO:0005643	nuclear pore	cellular_component	4	3079	28	36612	1.69869623718276	0.205671455773342	0.951788836620176	Gohir.A03G115400/Gohir.A07G035800/Gohir.A08G108000/Gohir.A12G243300
GO:0009086	methionine biosynthetic process	biological_process	3	3079	19	36612	1.87750636741252	0.211184552773263	0.951788836620176	Gohir.A13G097500/Gohir.D11G314900/Gohir.D13G102200
GO:0006631	fatty acid metabolic process	biological_process	5	3079	38	36612	1.56458863951044	0.211991961340517	0.951788836620176	Gohir.A06G064100/Gohir.A10G085600/Gohir.A11G200400/Gohir.D05G271700/Gohir.D11G223300
GO:0010181	FMN binding	molecular_function	6	3079	48	36612	1.48635920753491	0.213598403430336	0.951788836620176	Gohir.A01G115800/Gohir.A01G126300/Gohir.A03G179900/Gohir.A11G186500/Gohir.A12G147700/Gohir.D03G116900
GO:0004842	ubiquitin-protein transferase activity	molecular_function	24	3079	240	36612	1.18908736602793	0.215613319976969	0.951788836620176	Gohir.A01G115000/Gohir.A01G128300/Gohir.A03G112300/Gohir.A04G057200/Gohir.A05G174800/Gohir.A06G102400/Gohir.A06G134000/Gohir.A07G142200/Gohir.A07G142300/Gohir.A07G149200/Gohir.A07G160300/Gohir.A08G079500/Gohir.A08G199200/Gohir.A09G227600/Gohir.A10G083514/Gohir.A10G156600/Gohir.A10G239150/Gohir.A11G225800/Gohir.A12G070400/Gohir.A13G087900/Gohir.D01G091500/Gohir.D04G091616/Gohir.D06G139000/Gohir.D0…
GO:0008080	N-acetyltransferase activity	molecular_function	9	3079	79	36612	1.35465649294321	0.218062201760357	0.951788836620176	Gohir.A05G318600/Gohir.A08G096462/Gohir.A11G233700/Gohir.A12G075600/Gohir.A12G092500/Gohir.A13G092700/Gohir.A13G106032/Gohir.D08G097100/Gohir.D13G099300
GO:0016409	palmitoyltransferase activity	molecular_function	7	3079	59	36612	1.4107816207111	0.225262336009708	0.951788836620176	Gohir.A10G204100/Gohir.A11G223800/Gohir.A13G078500/Gohir.A13G094545/Gohir.D03G072501/Gohir.D03G072700/Gohir.D08G101200
GO:0030244	cellulose biosynthetic process	biological_process	9	3079	80	36612	1.33772328678142	0.228802792138853	0.951788836620176	Gohir.A06G111500/Gohir.A09G223800/Gohir.A10G115800/Gohir.A11G218600/Gohir.A11G235100/Gohir.A12G091622/Gohir.A12G091644/Gohir.D01G077000/Gohir.D04G151200
GO:0008146	sulfotransferase activity	molecular_function	8	3079	70	36612	1.35895698974621	0.233613217684316	0.951788836620176	Gohir.A01G052700/Gohir.A03G032800/Gohir.A04G012400/Gohir.A05G283750/Gohir.A11G234950/Gohir.D04G109200/Gohir.D11G240900/Gohir.D11G243333
GO:0009773	photosynthetic electron transport in photosystem I	biological_process	3	3079	20	36612	1.7836310490419	0.234032980739582	0.951788836620176	Gohir.A01G150154/Gohir.A09G017925/Gohir.A09G046200
GO:0000162	tryptophan biosynthetic process	biological_process	2	3079	11	36612	2.16197702914169	0.235206727266305	0.951788836620176	Gohir.A06G146500/Gohir.D13G144200
GO:0006094	gluconeogenesis	biological_process	2	3079	11	36612	2.16197702914169	0.235206727266305	0.951788836620176	Gohir.A11G209600/Gohir.D08G241300
GO:0006564	L-serine biosynthetic process	biological_process	2	3079	11	36612	2.16197702914169	0.235206727266305	0.951788836620176	Gohir.A07G170700/Gohir.D07G177500
GO:0006568	tryptophan metabolic process	biological_process	2	3079	11	36612	2.16197702914169	0.235206727266305	0.951788836620176	Gohir.A06G146500/Gohir.D13G144200
GO:0016811	hydrolase activity, acting on carbon-nitrogen (but not peptide) bonds, in linear amides	molecular_function	2	3079	11	36612	2.16197702914169	0.235206727266305	0.951788836620176	Gohir.A06G205800/Gohir.D11G207000
GO:0019346	transsulfuration	biological_process	2	3079	11	36612	2.16197702914169	0.235206727266305	0.951788836620176	Gohir.A11G308100/Gohir.A12G240000
GO:0004190	aspartic-type endopeptidase activity	molecular_function	16	3079	156	36612	1.21957678566967	0.239023420100686	0.951788836620176	Gohir.A04G050250/Gohir.A07G106400/Gohir.A08G039100/Gohir.A09G135400/Gohir.A10G136600/Gohir.A10G185800/Gohir.A11G148800/Gohir.A11G224200/Gohir.A12G093100/Gohir.A13G074400/Gohir.A13G095300/Gohir.A13G159000/Gohir.D06G156000/Gohir.D08G077100/Gohir.D11G238500/Gohir.D13G144900
GO:0004518	nuclease activity	molecular_function	6	3079	50	36612	1.42690483923352	0.241607694155535	0.951788836620176	Gohir.A03G079700/Gohir.A07G004100/Gohir.A08G110701/Gohir.A09G041365/Gohir.D03G074900/Gohir.D04G082216
GO:0016829	lyase activity	molecular_function	11	3079	103	36612	1.26989912876769	0.247674599619477	0.951788836620176	Gohir.A01G072700/Gohir.A04G023400/Gohir.A04G044750/Gohir.A05G289800/Gohir.A09G030900/Gohir.D01G085000/Gohir.D09G007600/Gohir.D11G154633/Gohir.D11G293700/Gohir.D13G147000/Gohir.D13G147100
GO:0016567	protein ubiquitination	biological_process	21	3079	213	36612	1.17233965664726	0.254420424241596	0.951788836620176	Gohir.A01G115000/Gohir.A03G112300/Gohir.A04G057200/Gohir.A06G102400/Gohir.A06G134000/Gohir.A07G142200/Gohir.A07G142300/Gohir.A07G149200/Gohir.A07G160300/Gohir.A08G072900/Gohir.A09G227600/Gohir.A10G083514/Gohir.A10G156600/Gohir.A10G239150/Gohir.A11G225800/Gohir.A12G070400/Gohir.A13G087900/Gohir.D01G091500/Gohir.D04G091616/Gohir.D06G139000/Gohir.D07G101600
GO:0008017	microtubule binding	molecular_function	20	3079	202	36612	1.17731422379003	0.254837130729952	0.951788836620176	Gohir.A03G113200/Gohir.A03G126700/Gohir.A04G053900/Gohir.A04G079500/Gohir.A05G185600/Gohir.A05G204800/Gohir.A05G219500/Gohir.A05G308700/Gohir.A06G154800/Gohir.A08G118200/Gohir.A09G047800/Gohir.A09G194400/Gohir.A10G109600/Gohir.A10G164500/Gohir.A12G094400/Gohir.A12G152200/Gohir.A13G031200/Gohir.A13G110800/Gohir.D03G073400/Gohir.D03G089500
GO:0000145	exocyst	cellular_component	8	3079	72	36612	1.32120818447548	0.257505983742534	0.951788836620176	Gohir.A01G128500/Gohir.A03G052500/Gohir.A09G009700/Gohir.A09G038200/Gohir.A09G045200/Gohir.A10G068000/Gohir.D09G131200/Gohir.D13G133033
GO:0001671	ATPase activator activity	molecular_function	2	3079	12	36612	1.98181227671322	0.267529882826507	0.951788836620176	Gohir.A01G200100/Gohir.D08G027100
GO:0005801	cis-Golgi network	cellular_component	2	3079	12	36612	1.98181227671322	0.267529882826507	0.951788836620176	Gohir.A07G146500/Gohir.D07G152600
GO:0005856	cytoskeleton	cellular_component	2	3079	12	36612	1.98181227671322	0.267529882826507	0.951788836620176	Gohir.A08G089300/Gohir.D08G100500
GO:0005885	Arp2/3 protein complex	cellular_component	2	3079	12	36612	1.98181227671322	0.267529882826507	0.951788836620176	Gohir.A08G089300/Gohir.D08G100500
GO:0008356	asymmetric cell division	biological_process	2	3079	12	36612	1.98181227671322	0.267529882826507	0.951788836620176	Gohir.A11G214900/Gohir.A12G077400
GO:0016841	ammonia-lyase activity	molecular_function	2	3079	12	36612	1.98181227671322	0.267529882826507	0.951788836620176	Gohir.A04G073300/Gohir.A09G148900
GO:0030151	molybdenum ion binding	molecular_function	2	3079	12	36612	1.98181227671322	0.267529882826507	0.951788836620176	Gohir.A09G035500/Gohir.D01G181700
GO:0034314	Arp2/3 complex-mediated actin nucleation	biological_process	2	3079	12	36612	1.98181227671322	0.267529882826507	0.951788836620176	Gohir.A08G089300/Gohir.D08G100500
GO:0048500	signal recognition particle	cellular_component	2	3079	12	36612	1.98181227671322	0.267529882826507	0.951788836620176	Gohir.A05G311500/Gohir.A08G188600
GO:0006506	GPI anchor biosynthetic process	biological_process	6	3079	52	36612	1.37202388387838	0.27061941118853	0.951788836620176	Gohir.A01G164900/Gohir.A04G065628/Gohir.A06G130506/Gohir.A09G031300/Gohir.A13G116801/Gohir.D07G225200
GO:0006888	endoplasmic reticulum to Golgi vesicle-mediated transport	biological_process	6	3079	52	36612	1.37202388387838	0.27061941118853	0.951788836620176	Gohir.A05G322500/Gohir.A06G045200/Gohir.A07G146500/Gohir.A10G114113/Gohir.A12G093750/Gohir.D07G152600
GO:0004499	N,N-dimethylaniline monooxygenase activity	molecular_function	5	3079	42	36612	1.4155801976523	0.276449817085587	0.951788836620176	Gohir.A06G062700/Gohir.A07G153900/Gohir.A10G119700/Gohir.D06G061000/Gohir.D06G095000
GO:0006887	exocytosis	biological_process	7	3079	63	36612	1.32120818447548	0.27753115217798	0.951788836620176	Gohir.A01G128500/Gohir.A03G052500/Gohir.A09G009700/Gohir.A09G038200/Gohir.A09G045200/Gohir.A10G068000/Gohir.D09G131200
GO:0042626	ATPase-coupled transmembrane transporter activity	molecular_function	12	3079	117	36612	1.21957678566967	0.278999433670352	0.951788836620176	Gohir.A01G131111/Gohir.A07G153100/Gohir.A08G094300/Gohir.A10G061375/Gohir.A11G134000/Gohir.A11G201000/Gohir.A12G045700/Gohir.A12G056100/Gohir.A12G120300/Gohir.D03G037100/Gohir.D03G145900/Gohir.D11G119900
GO:0005545	1-phosphatidylinositol binding	molecular_function	4	3079	32	36612	1.48635920753491	0.280702831174491	0.951788836620176	Gohir.A04G142100/Gohir.A04G143700/Gohir.A05G309300/Gohir.D08G090600
GO:0006890	retrograde vesicle-mediated transport, Golgi to endoplasmic reticulum	biological_process	4	3079	32	36612	1.48635920753491	0.280702831174491	0.951788836620176	Gohir.A09G185800/Gohir.A11G227300/Gohir.D09G180800/Gohir.D11G230000
GO:0030136	clathrin-coated vesicle	cellular_component	4	3079	32	36612	1.48635920753491	0.280702831174491	0.951788836620176	Gohir.A04G142100/Gohir.A04G143700/Gohir.A05G309300/Gohir.D08G090600
GO:0048268	clathrin coat assembly	biological_process	4	3079	32	36612	1.48635920753491	0.280702831174491	0.951788836620176	Gohir.A04G142100/Gohir.A04G143700/Gohir.A05G309300/Gohir.D08G090600
GO:0007010	cytoskeleton organization	biological_process	3	3079	22	36612	1.62148277185627	0.280826245146696	0.951788836620176	Gohir.A05G308700/Gohir.A06G154800/Gohir.A12G152200
GO:0009630	gravitropism	biological_process	3	3079	22	36612	1.62148277185627	0.280826245146696	0.951788836620176	Gohir.A03G113400/Gohir.A05G308250/Gohir.D01G135100
GO:0003723	RNA binding	molecular_function	56	3079	618	36612	1.0774901698635	0.29808189541424	0.951788836620176	Gohir.1Z049534/Gohir.1Z049834/Gohir.1Z050292/Gohir.A01G122600/Gohir.A01G137591/Gohir.A03G070700/Gohir.A03G081600/Gohir.A03G088700/Gohir.A03G092800/Gohir.A04G035600/Gohir.A04G039090/Gohir.A05G324701/Gohir.A05G328300/Gohir.A06G111300/Gohir.A06G112400/Gohir.A07G070000/Gohir.A07G144501/Gohir.A07G163636/Gohir.A08G017400/Gohir.A08G157500/Gohir.A08G230500/Gohir.A08G236300/Gohir.A09G045446/Gohir.A09G0587…
GO:0000250	lanosterol synthase activity	molecular_function	2	3079	13	36612	1.82936517850451	0.299827025713085	0.951788836620176	Gohir.A06G102900/Gohir.A10G041100
GO:0005811	lipid droplet	cellular_component	2	3079	13	36612	1.82936517850451	0.299827025713085	0.951788836620176	Gohir.A06G102900/Gohir.A10G041100
GO:0007020	microtubule nucleation	biological_process	2	3079	13	36612	1.82936517850451	0.299827025713085	0.951788836620176	Gohir.A04G057400/Gohir.D11G099800
GO:0016104	triterpenoid biosynthetic process	biological_process	2	3079	13	36612	1.82936517850451	0.299827025713085	0.951788836620176	Gohir.A06G102900/Gohir.A10G041100
GO:0035267	NuA4 histone acetyltransferase complex	cellular_component	2	3079	13	36612	1.82936517850451	0.299827025713085	0.951788836620176	Gohir.D01G119300/Gohir.D08G141300
GO:0042300	beta-amyrin synthase activity	molecular_function	2	3079	13	36612	1.82936517850451	0.299827025713085	0.951788836620176	Gohir.A06G102900/Gohir.A10G041100
GO:0047429	nucleoside-triphosphate diphosphatase activity	molecular_function	2	3079	13	36612	1.82936517850451	0.299827025713085	0.951788836620176	Gohir.A03G078800/Gohir.A10G110000
GO:0016614	oxidoreductase activity, acting on CH-OH group of donors	molecular_function	4	3079	33	36612	1.4413180194278	0.30012979930264	0.951788836620176	Gohir.A05G341600/Gohir.A07G150400/Gohir.A10G109550/Gohir.D07G156800
GO:0008289	lipid binding	molecular_function	17	3079	175	36612	1.15511344128428	0.303208243523424	0.951788836620176	Gohir.1Z049321/Gohir.A01G076401/Gohir.A03G033200/Gohir.A03G088600/Gohir.A03G109200/Gohir.A06G092400/Gohir.A06G133900/Gohir.A09G040400/Gohir.A10G147900/Gohir.A10G150100/Gohir.A12G075500/Gohir.D01G063932/Gohir.D07G080100/Gohir.D08G037101/Gohir.D08G100300/Gohir.D08G112600/Gohir.D13G095200
GO:0005887	integral component of plasma membrane	cellular_component	3	3079	23	36612	1.550983520906	0.304543642507862	0.951788836620176	Gohir.A04G094400/Gohir.A13G121800/Gohir.D08G071950
GO:0006913	nucleocytoplasmic transport	biological_process	3	3079	23	36612	1.550983520906	0.304543642507862	0.951788836620176	Gohir.A03G115400/Gohir.A08G108000/Gohir.D09G180000
GO:0010274	hydrotropism	biological_process	3	3079	23	36612	1.550983520906	0.304543642507862	0.951788836620176	Gohir.A10G086800/Gohir.A12G185300/Gohir.D03G069700
GO:0048046	apoplast	cellular_component	13	3079	131	36612	1.18001036323383	0.308022741836385	0.951788836620176	Gohir.A03G044350/Gohir.A05G099400/Gohir.A06G109600/Gohir.A11G229300/Gohir.A12G079400/Gohir.D03G050800/Gohir.D03G118100/Gohir.D04G126700/Gohir.D04G128900/Gohir.D06G166700/Gohir.D08G095200/Gohir.D13G019300/Gohir.D13G085400
GO:0005507	copper ion binding	molecular_function	16	3079	165	36612	1.15305441554224	0.313165153105817	0.951788836620176	Gohir.A03G044350/Gohir.A05G099400/Gohir.A06G109600/Gohir.A08G082562/Gohir.A08G125401/Gohir.A12G071900/Gohir.A12G144700/Gohir.D01G094600/Gohir.D03G118100/Gohir.D04G126700/Gohir.D04G128900/Gohir.D06G166700/Gohir.D08G092701/Gohir.D08G200000/Gohir.D13G019300/Gohir.D13G085400
GO:0016705	oxidoreductase activity, acting on paired donors, with incorporation or reduction of molecular oxygen	molecular_function	53	3079	588	36612	1.07179643536531	0.318198107150894	0.951788836620176	Gohir.A01G088700/Gohir.A01G094950/Gohir.A01G207501/Gohir.A03G115300/Gohir.A04G046866/Gohir.A05G109400/Gohir.A05G198200/Gohir.A05G202500/Gohir.A05G262900/Gohir.A06G014400/Gohir.A06G057900/Gohir.A06G110300/Gohir.A07G055700/Gohir.A07G092600/Gohir.A08G110000/Gohir.A08G148900/Gohir.A08G158350/Gohir.A08G158500/Gohir.A09G043660/Gohir.A09G047300/Gohir.A10G178100/Gohir.A10G179800/Gohir.A10G197700/Gohir.A1…
GO:0009639	response to red or far red light	biological_process	3	3079	24	36612	1.48635920753491	0.328336047157957	0.951788836620176	Gohir.A08G031400/Gohir.A11G080000/Gohir.A13G092310
GO:0042803	protein homodimerization activity	molecular_function	3	3079	24	36612	1.48635920753491	0.328336047157957	0.951788836620176	Gohir.A09G031100/Gohir.A10G068120/Gohir.A11G261900
GO:0000723	telomere maintenance	biological_process	2	3079	14	36612	1.69869623718276	0.331873991272185	0.951788836620176	Gohir.A07G073600/Gohir.D11G222214
GO:0006559	L-phenylalanine catabolic process	biological_process	2	3079	14	36612	1.69869623718276	0.331873991272185	0.951788836620176	Gohir.A04G073300/Gohir.A09G148900
GO:0008312	7S RNA binding	molecular_function	2	3079	14	36612	1.69869623718276	0.331873991272185	0.951788836620176	Gohir.A05G311500/Gohir.A08G188600
GO:0009331	glycerol-3-phosphate dehydrogenase complex	cellular_component	2	3079	14	36612	1.69869623718276	0.331873991272185	0.951788836620176	Gohir.A09G031100/Gohir.D04G004700
GO:0010089	xylem development	biological_process	2	3079	14	36612	1.69869623718276	0.331873991272185	0.951788836620176	Gohir.A01G076300/Gohir.A10G123100
GO:0015018	galactosylgalactosylxylosylprotein 3-beta-glucuronosyltransferase activity	molecular_function	2	3079	14	36612	1.69869623718276	0.331873991272185	0.951788836620176	Gohir.A06G028900/Gohir.D11G202200
GO:0030015	CCR4-NOT core complex	cellular_component	2	3079	14	36612	1.69869623718276	0.331873991272185	0.951788836620176	Gohir.A13G105600/Gohir.D13G109400
GO:0033179	proton-transporting V-type ATPase, V0 domain	cellular_component	4	3079	35	36612	1.35895698974621	0.339365747452076	0.951788836620176	Gohir.A01G113400/Gohir.A13G086625/Gohir.D03G064500/Gohir.D11G184900
GO:0016747	transferase activity, transferring acyl groups other than amino-acyl groups	molecular_function	24	3079	259	36612	1.10185701871314	0.340132076708414	0.951788836620176	Gohir.A01G126200/Gohir.A05G241400/Gohir.A05G316200/Gohir.A05G318401/Gohir.A05G322900/Gohir.A05G336400/Gohir.A06G060400/Gohir.A06G079000/Gohir.A08G098500/Gohir.A08G123200/Gohir.A08G137800/Gohir.A08G165850/Gohir.A10G118600/Gohir.A10G121400/Gohir.A10G121800/Gohir.A10G141400/Gohir.A11G269000/Gohir.A12G115800/Gohir.A13G158466/Gohir.D01G113800/Gohir.D04G066800/Gohir.D06G080532/Gohir.D06G201000/Gohir.D1…
GO:0043565	sequence-specific DNA binding	molecular_function	41	3079	456	36612	1.06913557033213	0.350102027404952	0.951788836620176	Gohir.A01G082400/Gohir.A01G122700/Gohir.A01G136700/Gohir.A01G154000/Gohir.A03G076400/Gohir.A04G077300/Gohir.A05G363500/Gohir.A05G376800/Gohir.A06G062600/Gohir.A06G111002/Gohir.A06G149900/Gohir.A07G084354/Gohir.A07G135300/Gohir.A08G137400/Gohir.A09G036600/Gohir.A09G240900/Gohir.A10G086300/Gohir.A11G014000/Gohir.A11G076600/Gohir.A11G204300/Gohir.A11G211000/Gohir.A11G214900/Gohir.A11G221100/Gohir.A1…
GO:0006096	glycolytic process	biological_process	11	3079	113	36612	1.15751867489445	0.352097846422742	0.951788836620176	Gohir.A04G065600/Gohir.A04G065642/Gohir.A06G151500/Gohir.A08G000400/Gohir.A08G083100/Gohir.A08G096300/Gohir.A08G097100/Gohir.A13G030500/Gohir.D03G100000/Gohir.D04G103800/Gohir.D08G107600
GO:0006535	cysteine biosynthetic process from serine	biological_process	3	3079	25	36612	1.42690483923352	0.352109298138428	0.951788836620176	Gohir.A13G096100/Gohir.A13G134101/Gohir.D13G176700
GO:0009408	response to heat	biological_process	3	3079	25	36612	1.42690483923352	0.352109298138428	0.951788836620176	Gohir.A06G113200/Gohir.A08G053500/Gohir.D08G063000
GO:0019901	protein kinase binding	molecular_function	3	3079	25	36612	1.42690483923352	0.352109298138428	0.951788836620176	Gohir.A08G137300/Gohir.A11G243500/Gohir.D08G075500
GO:0042393	histone binding	molecular_function	3	3079	25	36612	1.42690483923352	0.352109298138428	0.951788836620176	Gohir.A06G118800/Gohir.D06G123300/Gohir.D09G234100
GO:0003935	GTP cyclohydrolase II activity	molecular_function	1	3079	5	36612	2.37817473205586	0.355483732238617	0.951788836620176	Gohir.D03G130200
GO:0004377	GDP-Man:Man3GlcNAc2-PP-Dol alpha-1,2-mannosyltransferase activity	molecular_function	1	3079	5	36612	2.37817473205586	0.355483732238617	0.951788836620176	Gohir.A13G014500
GO:0004665	prephenate dehydrogenase (NADP+) activity	molecular_function	1	3079	5	36612	2.37817473205586	0.355483732238617	0.951788836620176	Gohir.D09G111600
GO:0004719	protein-L-isoaspartate (D-aspartate) O-methyltransferase activity	molecular_function	1	3079	5	36612	2.37817473205586	0.355483732238617	0.951788836620176	Gohir.A03G075600
GO:0004809	tRNA (guanine-N2-)-methyltransferase activity	molecular_function	1	3079	5	36612	2.37817473205586	0.355483732238617	0.951788836620176	Gohir.D11G165800
GO:0004824	lysine-tRNA ligase activity	molecular_function	1	3079	5	36612	2.37817473205586	0.355483732238617	0.951788836620176	Gohir.A10G142700
GO:0006302	double-strand break repair	biological_process	1	3079	5	36612	2.37817473205586	0.355483732238617	0.951788836620176	Gohir.A04G025700
GO:0006430	lysyl-tRNA aminoacylation	biological_process	1	3079	5	36612	2.37817473205586	0.355483732238617	0.951788836620176	Gohir.A10G142700
GO:0006537	glutamate biosynthetic process	biological_process	1	3079	5	36612	2.37817473205586	0.355483732238617	0.951788836620176	Gohir.A01G193200
GO:0006571	tyrosine biosynthetic process	biological_process	1	3079	5	36612	2.37817473205586	0.355483732238617	0.951788836620176	Gohir.D09G111600
GO:0006654	phosphatidic acid biosynthetic process	biological_process	1	3079	5	36612	2.37817473205586	0.355483732238617	0.951788836620176	Gohir.A10G167300
GO:0007023	post-chaperonin tubulin folding pathway	biological_process	1	3079	5	36612	2.37817473205586	0.355483732238617	0.951788836620176	Gohir.D11G220800
GO:0007059	chromosome segregation	biological_process	1	3079	5	36612	2.37817473205586	0.355483732238617	0.951788836620176	Gohir.A12G094400
GO:0008381	mechanosensitive ion channel activity	molecular_function	1	3079	5	36612	2.37817473205586	0.355483732238617	0.951788836620176	Gohir.A13G106800
GO:0008977	prephenate dehydrogenase (NAD+) activity	molecular_function	1	3079	5	36612	2.37817473205586	0.355483732238617	0.951788836620176	Gohir.D09G111600
GO:0010598	NAD(P)H dehydrogenase complex (plastoquinone)	cellular_component	1	3079	5	36612	2.37817473205586	0.355483732238617	0.951788836620176	Gohir.A01G150154
GO:0016560	protein import into peroxisome matrix, docking	biological_process	1	3079	5	36612	2.37817473205586	0.355483732238617	0.951788836620176	Gohir.A07G157900
GO:0016701	oxidoreductase activity, acting on single donors with incorporation of molecular oxygen	molecular_function	1	3079	5	36612	2.37817473205586	0.355483732238617	0.951788836620176	Gohir.A07G080400
GO:0017148	negative regulation of translation	biological_process	1	3079	5	36612	2.37817473205586	0.355483732238617	0.951788836620176	Gohir.A13G077450
GO:0019825	oxygen binding	molecular_function	1	3079	5	36612	2.37817473205586	0.355483732238617	0.951788836620176	Gohir.D01G118300
GO:0030598	rRNA N-glycosylase activity	molecular_function	1	3079	5	36612	2.37817473205586	0.355483732238617	0.951788836620176	Gohir.A13G077450
GO:0030880	RNA polymerase complex	cellular_component	1	3079	5	36612	2.37817473205586	0.355483732238617	0.951788836620176	Gohir.A10G084400
GO:0035494	SNARE complex disassembly	biological_process	1	3079	5	36612	2.37817473205586	0.355483732238617	0.951788836620176	Gohir.D06G131800
GO:0040029	regulation of gene expression, epigenetic	biological_process	1	3079	5	36612	2.37817473205586	0.355483732238617	0.951788836620176	Gohir.A07G141800
GO:0042752	regulation of circadian rhythm	biological_process	1	3079	5	36612	2.37817473205586	0.355483732238617	0.951788836620176	Gohir.A10G117100
GO:0046914	transition metal ion binding	molecular_function	1	3079	5	36612	2.37817473205586	0.355483732238617	0.951788836620176	Gohir.A06G078700
GO:0048017	inositol lipid-mediated signaling	biological_process	1	3079	5	36612	2.37817473205586	0.355483732238617	0.951788836620176	Gohir.A10G167300
GO:0048578	positive regulation of long-day photoperiodism, flowering	biological_process	1	3079	5	36612	2.37817473205586	0.355483732238617	0.951788836620176	Gohir.D06G135300
GO:0060918	auxin transport	biological_process	1	3079	5	36612	2.37817473205586	0.355483732238617	0.951788836620176	Gohir.D06G103900
GO:1901671	positive regulation of superoxide dismutase activity	biological_process	1	3079	5	36612	2.37817473205586	0.355483732238617	0.951788836620176	Gohir.A06G078700
GO:0004743	pyruvate kinase activity	molecular_function	4	3079	36	36612	1.32120818447548	0.3590638424366	0.951788836620176	Gohir.A08G083100/Gohir.A08G096300/Gohir.A08G097100/Gohir.D08G107600
GO:0030955	potassium ion binding	molecular_function	4	3079	36	36612	1.32120818447548	0.3590638424366	0.951788836620176	Gohir.A08G083100/Gohir.A08G096300/Gohir.A08G097100/Gohir.D08G107600
GO:0008033	tRNA processing	biological_process	5	3079	47	36612	1.26498655960418	0.361345663846622	0.951788836620176	Gohir.A04G098300/Gohir.A05G321400/Gohir.A10G114600/Gohir.D11G165800/Gohir.D13G107450
GO:0003993	acid phosphatase activity	molecular_function	6	3079	58	36612	1.23009037864958	0.361480933693741	0.951788836620176	Gohir.A01G142800/Gohir.A03G081901/Gohir.A13G138700/Gohir.D04G101000/Gohir.D08G076466/Gohir.D13G082400
GO:0002161	aminoacyl-tRNA editing activity	molecular_function	2	3079	15	36612	1.58544982137057	0.363484479981303	0.951788836620176	Gohir.A11G237100/Gohir.D11G247600
GO:0006072	glycerol-3-phosphate metabolic process	biological_process	2	3079	15	36612	1.58544982137057	0.363484479981303	0.951788836620176	Gohir.A09G031100/Gohir.D04G004700
GO:0006189	'de novo' IMP biosynthetic process	biological_process	2	3079	15	36612	1.58544982137057	0.363484479981303	0.951788836620176	Gohir.A04G076000/Gohir.A08G169100
GO:0006974	cellular response to DNA damage stimulus	biological_process	2	3079	15	36612	1.58544982137057	0.363484479981303	0.951788836620176	Gohir.A01G128300/Gohir.A05G317471
GO:0009638	phototropism	biological_process	2	3079	15	36612	1.58544982137057	0.363484479981303	0.951788836620176	Gohir.A03G098250/Gohir.D03G092800
GO:0019829	ATPase-coupled cation transmembrane transporter activity	molecular_function	2	3079	15	36612	1.58544982137057	0.363484479981303	0.951788836620176	Gohir.A08G083400/Gohir.D08G200000
GO:2001070	starch binding	molecular_function	2	3079	15	36612	1.58544982137057	0.363484479981303	0.951788836620176	Gohir.A03G028500/Gohir.D09G160100
GO:0031047	gene silencing by RNA	biological_process	3	3079	26	36612	1.37202388387838	0.375777285865316	0.951788836620176	Gohir.A10G158600/Gohir.D06G172500/Gohir.D09G055300
GO:0043022	ribosome binding	molecular_function	3	3079	26	36612	1.37202388387838	0.375777285865316	0.951788836620176	Gohir.A07G070000/Gohir.A11G243500/Gohir.A13G075800
GO:0000902	cell morphogenesis	biological_process	2	3079	16	36612	1.48635920753491	0.394505277398237	0.951788836620176	Gohir.D04G088800/Gohir.D11G220800
GO:0004861	cyclin-dependent protein serine/threonine kinase inhibitor activity	molecular_function	2	3079	16	36612	1.48635920753491	0.394505277398237	0.951788836620176	Gohir.A05G316301/Gohir.A10G092200
GO:0006779	porphyrin-containing compound biosynthetic process	biological_process	2	3079	16	36612	1.48635920753491	0.394505277398237	0.951788836620176	Gohir.A04G042000/Gohir.A05G340200
GO:0007050	cell cycle arrest	biological_process	2	3079	16	36612	1.48635920753491	0.394505277398237	0.951788836620176	Gohir.A05G316301/Gohir.A10G092200
GO:0016272	prefoldin complex	cellular_component	2	3079	16	36612	1.48635920753491	0.394505277398237	0.951788836620176	Gohir.A05G286200/Gohir.D01G100600
GO:0019887	protein kinase regulator activity	molecular_function	2	3079	16	36612	1.48635920753491	0.394505277398237	0.951788836620176	Gohir.A08G140000/Gohir.A11G243500
GO:0003690	double-stranded DNA binding	molecular_function	8	3079	83	36612	1.14610830460523	0.398080065469077	0.951788836620176	Gohir.A04G058300/Gohir.A05G312400/Gohir.A06G112700/Gohir.A12G093850/Gohir.D01G023463/Gohir.D01G115100/Gohir.D03G069704/Gohir.D04G096600
GO:0051087	chaperone binding	molecular_function	4	3079	38	36612	1.25167091160835	0.398364205575106	0.951788836620176	Gohir.A01G200100/Gohir.A08G101800/Gohir.D08G027100/Gohir.D08G113100
GO:0010374	stomatal complex development	biological_process	3	3079	27	36612	1.32120818447548	0.399261873534243	0.951788836620176	Gohir.A05G272100/Gohir.A10G118700/Gohir.A11G210800
GO:0048193	Golgi vesicle transport	biological_process	3	3079	27	36612	1.32120818447548	0.399261873534243	0.951788836620176	Gohir.A04G063670/Gohir.A10G196100/Gohir.D09G115300
GO:0000785	chromatin	cellular_component	1	3079	6	36612	1.98181227671322	0.409693735473991	0.951788836620176	Gohir.A07G173200
GO:0003876	AMP deaminase activity	molecular_function	1	3079	6	36612	1.98181227671322	0.409693735473991	0.951788836620176	Gohir.D01G130900
GO:0003958	NADPH-hemoprotein reductase activity	molecular_function	1	3079	6	36612	1.98181227671322	0.409693735473991	0.951788836620176	Gohir.A01G126300
GO:0004348	glucosylceramidase activity	molecular_function	1	3079	6	36612	1.98181227671322	0.409693735473991	0.951788836620176	Gohir.A10G122500
GO:0004534	5'-3' exoribonuclease activity	molecular_function	1	3079	6	36612	1.98181227671322	0.409693735473991	0.951788836620176	Gohir.D13G108500
GO:0004784	superoxide dismutase activity	molecular_function	1	3079	6	36612	1.98181227671322	0.409693735473991	0.951788836620176	Gohir.A10G178700
GO:0005381	iron ion transmembrane transporter activity	molecular_function	1	3079	6	36612	1.98181227671322	0.409693735473991	0.951788836620176	Gohir.D13G115300
GO:0005740	mitochondrial envelope	cellular_component	1	3079	6	36612	1.98181227671322	0.409693735473991	0.951788836620176	Gohir.D06G123400
GO:0006527	arginine catabolic process	biological_process	1	3079	6	36612	1.98181227671322	0.409693735473991	0.951788836620176	Gohir.A04G123600
GO:0006596	polyamine biosynthetic process	biological_process	1	3079	6	36612	1.98181227671322	0.409693735473991	0.951788836620176	Gohir.D11G264400
GO:0006680	glucosylceramide catabolic process	biological_process	1	3079	6	36612	1.98181227671322	0.409693735473991	0.951788836620176	Gohir.A10G122500
GO:0008195	phosphatidate phosphatase activity	molecular_function	1	3079	6	36612	1.98181227671322	0.409693735473991	0.951788836620176	Gohir.A05G315200
GO:0008515	sucrose transmembrane transporter activity	molecular_function	1	3079	6	36612	1.98181227671322	0.409693735473991	0.951788836620176	Gohir.A13G121800
GO:0008792	arginine decarboxylase activity	molecular_function	1	3079	6	36612	1.98181227671322	0.409693735473991	0.951788836620176	Gohir.A04G123600
GO:0009873	ethylene-activated signaling pathway	biological_process	1	3079	6	36612	1.98181227671322	0.409693735473991	0.951788836620176	Gohir.A04G073500
GO:0015770	sucrose transport	biological_process	1	3079	6	36612	1.98181227671322	0.409693735473991	0.951788836620176	Gohir.A13G121800
GO:0016655	oxidoreductase activity, acting on NAD(P)H, quinone or similar compound as acceptor	molecular_function	1	3079	6	36612	1.98181227671322	0.409693735473991	0.951788836620176	Gohir.1Z049731
GO:0017108	5'-flap endonuclease activity	molecular_function	1	3079	6	36612	1.98181227671322	0.409693735473991	0.951788836620176	Gohir.A05G333800
GO:0017183	peptidyl-diphthamide biosynthetic process from peptidyl-histidine	biological_process	1	3079	6	36612	1.98181227671322	0.409693735473991	0.951788836620176	Gohir.A04G073032
GO:0022843	voltage-gated cation channel activity	molecular_function	1	3079	6	36612	1.98181227671322	0.409693735473991	0.951788836620176	Gohir.A05G321300
GO:0032264	IMP salvage	biological_process	1	3079	6	36612	1.98181227671322	0.409693735473991	0.951788836620176	Gohir.D01G130900
GO:0034755	iron ion transmembrane transport	biological_process	1	3079	6	36612	1.98181227671322	0.409693735473991	0.951788836620176	Gohir.D13G115300
GO:0034765	regulation of ion transmembrane transport	biological_process	1	3079	6	36612	1.98181227671322	0.409693735473991	0.951788836620176	Gohir.A05G321300
GO:0048731	system development	biological_process	1	3079	6	36612	1.98181227671322	0.409693735473991	0.951788836620176	Gohir.A03G120200
GO:0050826	response to freezing	biological_process	1	3079	6	36612	1.98181227671322	0.409693735473991	0.951788836620176	Gohir.D04G132600
GO:0120009	intermembrane lipid transfer	biological_process	1	3079	6	36612	1.98181227671322	0.409693735473991	0.951788836620176	Gohir.D08G133133
GO:0120013	lipid transfer activity	molecular_function	1	3079	6	36612	1.98181227671322	0.409693735473991	0.951788836620176	Gohir.D08G133133
GO:0015035	protein disulfide oxidoreductase activity	molecular_function	11	3079	119	36612	1.09915638876531	0.417866819382722	0.951788836620176	Gohir.A03G092600/Gohir.A03G110600/Gohir.A04G055500/Gohir.A07G179800/Gohir.A07G231600/Gohir.A08G116700/Gohir.A09G139600/Gohir.A10G025200/Gohir.A10G161200/Gohir.A10G161300/Gohir.A12G275300
GO:0005739	mitochondrion	cellular_component	4	3079	39	36612	1.21957678566967	0.41787309576131	0.951788836620176	Gohir.A01G137400/Gohir.D01G124600/Gohir.D04G086500/Gohir.D11G190100
GO:0030001	metal ion transport	biological_process	19	3079	212	36612	1.06569150728918	0.420883029154726	0.951788836620176	Gohir.A01G168700/Gohir.A04G073500/Gohir.A07G049700/Gohir.A07G140100/Gohir.A08G083400/Gohir.A08G108700/Gohir.A09G041900/Gohir.A09G054400/Gohir.A11G282913/Gohir.A12G107200/Gohir.A13G133700/Gohir.D01G159600/Gohir.D03G044200/Gohir.D03G140400/Gohir.D03G147700/Gohir.D08G200000/Gohir.D09G053480/Gohir.D11G162500/Gohir.D13G114800
GO:0000226	microtubule cytoskeleton organization	biological_process	3	3079	28	36612	1.27402217788707	0.422492723665551	0.951788836620176	Gohir.A03G113200/Gohir.A03G126700/Gohir.A04G057400
GO:0000724	double-strand break repair via homologous recombination	biological_process	2	3079	17	36612	1.39892631297404	0.424812009897035	0.951788836620176	Gohir.A06G110404/Gohir.D06G123600
GO:0006644	phospholipid metabolic process	biological_process	2	3079	17	36612	1.39892631297404	0.424812009897035	0.951788836620176	Gohir.A05G315200/Gohir.A13G109400
GO:0009231	riboflavin biosynthetic process	biological_process	2	3079	17	36612	1.39892631297404	0.424812009897035	0.951788836620176	Gohir.A10G087001/Gohir.D03G130200
GO:0016308	1-phosphatidylinositol-4-phosphate 5-kinase activity	molecular_function	2	3079	17	36612	1.39892631297404	0.424812009897035	0.951788836620176	Gohir.D03G067500/Gohir.D04G108600
GO:0016846	carbon-sulfur lyase activity	molecular_function	2	3079	17	36612	1.39892631297404	0.424812009897035	0.951788836620176	Gohir.A01G122800/Gohir.A07G154100
GO:0030060	L-malate dehydrogenase activity	molecular_function	2	3079	17	36612	1.39892631297404	0.424812009897035	0.951788836620176	Gohir.A10G111200/Gohir.A12G096100
GO:0032040	small-subunit processome	cellular_component	2	3079	17	36612	1.39892631297404	0.424812009897035	0.951788836620176	Gohir.A12G131050/Gohir.A13G156800
GO:0061608	nuclear import signal receptor activity	molecular_function	2	3079	17	36612	1.39892631297404	0.424812009897035	0.951788836620176	Gohir.A13G079300/Gohir.D13G095900
GO:0005543	phospholipid binding	molecular_function	4	3079	40	36612	1.18908736602793	0.437230760443241	0.951788836620176	Gohir.A04G142100/Gohir.A04G143700/Gohir.A05G309300/Gohir.D08G090600
GO:0016788	hydrolase activity, acting on ester bonds	molecular_function	20	3079	226	36612	1.0522897044495	0.439898507936538	0.951788836620176	Gohir.A03G050900/Gohir.A05G152400/Gohir.A06G110802/Gohir.A07G168400/Gohir.A07G188000/Gohir.A08G070000/Gohir.A08G232600/Gohir.A09G033100/Gohir.A09G035000/Gohir.A11G171200/Gohir.A11G243300/Gohir.A11G243366/Gohir.A13G083200/Gohir.D06G134250/Gohir.D06G134450/Gohir.D08G093100/Gohir.D09G243300/Gohir.D11G039900/Gohir.D11G159350/Gohir.D13G096400
GO:0016791	phosphatase activity	molecular_function	9	3079	98	36612	1.09201900961749	0.442590800110877	0.951788836620176	Gohir.A01G162800/Gohir.A05G026900/Gohir.A05G393800/Gohir.A06G128002/Gohir.A07G168600/Gohir.A10G061800/Gohir.D06G139200/Gohir.D11G026900/Gohir.D13G049650
GO:0016787	hydrolase activity	molecular_function	46	3079	532	36612	1.02815824882114	0.444158964638721	0.951788836620176	Gohir.A01G140607/Gohir.A01G142800/Gohir.A01G147400/Gohir.A01G156500/Gohir.A03G044100/Gohir.A03G081901/Gohir.A03G114700/Gohir.A04G025700/Gohir.A04G060000/Gohir.A04G062650/Gohir.A04G072300/Gohir.A04G098900/Gohir.A05G304350/Gohir.A06G073500/Gohir.A06G125200/Gohir.A06G130200/Gohir.A06G194800/Gohir.A07G174750/Gohir.A09G033200/Gohir.A09G055900/Gohir.A09G147700/Gohir.A10G058200/Gohir.A10G160650/Gohir.A1…
GO:0008652	cellular amino acid biosynthetic process	biological_process	3	3079	29	36612	1.23009037864958	0.445407050581895	0.951788836620176	Gohir.A13G097500/Gohir.D11G314900/Gohir.D13G102200
GO:0051536	iron-sulfur cluster binding	molecular_function	10	3079	110	36612	1.08098851457085	0.447027533718488	0.951788836620176	Gohir.1Z049499/Gohir.A01G115800/Gohir.A06G136700/Gohir.A07G170100/Gohir.A09G102200/Gohir.A09G216000/Gohir.A12G093625/Gohir.A13G222600/Gohir.D01G102255/Gohir.D07G155032
GO:0004124	cysteine synthase activity	molecular_function	2	3079	18	36612	1.32120818447548	0.454305379924038	0.951788836620176	Gohir.A13G096100/Gohir.D13G176700
GO:0005247	voltage-gated chloride channel activity	molecular_function	2	3079	18	36612	1.32120818447548	0.454305379924038	0.951788836620176	Gohir.A12G011800/Gohir.D13G131500
GO:0022900	electron transport chain	biological_process	2	3079	18	36612	1.32120818447548	0.454305379924038	0.951788836620176	Gohir.A09G216000/Gohir.A13G222600
GO:0030276	clathrin binding	molecular_function	4	3079	41	36612	1.1600852351492	0.456398391088178	0.951788836620176	Gohir.A04G142100/Gohir.A04G143700/Gohir.A05G309300/Gohir.D08G090600
GO:0003916	DNA topoisomerase activity	molecular_function	1	3079	7	36612	1.69869623718276	0.459345513556151	0.951788836620176	Gohir.A10G131800
GO:0004335	galactokinase activity	molecular_function	1	3079	7	36612	1.69869623718276	0.459345513556151	0.951788836620176	Gohir.A05G001766
GO:0004385	guanylate kinase activity	molecular_function	1	3079	7	36612	1.69869623718276	0.459345513556151	0.951788836620176	Gohir.D03G067400
GO:0004635	phosphoribosyl-AMP cyclohydrolase activity	molecular_function	1	3079	7	36612	1.69869623718276	0.459345513556151	0.951788836620176	Gohir.A09G051200
GO:0006163	purine nucleotide metabolic process	biological_process	1	3079	7	36612	1.69869623718276	0.459345513556151	0.951788836620176	Gohir.D03G067400
GO:0006325	chromatin organization	biological_process	1	3079	7	36612	1.69869623718276	0.459345513556151	0.951788836620176	Gohir.A05G082000
GO:0006417	regulation of translation	biological_process	1	3079	7	36612	1.69869623718276	0.459345513556151	0.951788836620176	Gohir.A11G243500
GO:0006672	ceramide metabolic process	biological_process	1	3079	7	36612	1.69869623718276	0.459345513556151	0.951788836620176	Gohir.A06G205800
GO:0006839	mitochondrial transport	biological_process	1	3079	7	36612	1.69869623718276	0.459345513556151	0.951788836620176	Gohir.D11G217400
GO:0008252	nucleotidase activity	molecular_function	1	3079	7	36612	1.69869623718276	0.459345513556151	0.951788836620176	Gohir.A06G073500
GO:0009001	serine O-acetyltransferase activity	molecular_function	1	3079	7	36612	1.69869623718276	0.459345513556151	0.951788836620176	Gohir.A13G134101
GO:0009113	purine nucleobase biosynthetic process	biological_process	1	3079	7	36612	1.69869623718276	0.459345513556151	0.951788836620176	Gohir.A13G086600
GO:0009585	red, far-red light phototransduction	biological_process	1	3079	7	36612	1.69869623718276	0.459345513556151	0.951788836620176	Gohir.A11G261900
GO:0009902	chloroplast relocation	biological_process	1	3079	7	36612	1.69869623718276	0.459345513556151	0.951788836620176	Gohir.A06G074700
GO:0016559	peroxisome fission	biological_process	1	3079	7	36612	1.69869623718276	0.459345513556151	0.951788836620176	Gohir.A11G085200
GO:0017006	protein-tetrapyrrole linkage	biological_process	1	3079	7	36612	1.69869623718276	0.459345513556151	0.951788836620176	Gohir.A11G261900
GO:0032300	mismatch repair complex	cellular_component	1	3079	7	36612	1.69869623718276	0.459345513556151	0.951788836620176	Gohir.A09G046500
GO:0046835	carbohydrate phosphorylation	biological_process	1	3079	7	36612	1.69869623718276	0.459345513556151	0.951788836620176	Gohir.A05G001766
GO:0048015	phosphatidylinositol-mediated signaling	biological_process	1	3079	7	36612	1.69869623718276	0.459345513556151	0.951788836620176	Gohir.A12G090600
GO:0051091	positive regulation of DNA-binding transcription factor activity	biological_process	1	3079	7	36612	1.69869623718276	0.459345513556151	0.951788836620176	Gohir.A10G187100
GO:0051879	Hsp90 protein binding	molecular_function	1	3079	7	36612	1.69869623718276	0.459345513556151	0.951788836620176	Gohir.D08G027100
GO:0099402	plant organ development	biological_process	1	3079	7	36612	1.69869623718276	0.459345513556151	0.951788836620176	Gohir.D06G103900
GO:0016866	intramolecular transferase activity	molecular_function	3	3079	30	36612	1.18908736602793	0.467949316426476	0.951788836620176	Gohir.A06G102900/Gohir.A10G041100/Gohir.A13G084200
GO:0018216	peptidyl-arginine methylation	biological_process	3	3079	30	36612	1.18908736602793	0.467949316426476	0.951788836620176	Gohir.A03G112250/Gohir.D01G144700/Gohir.D08G102700
GO:0000184	nuclear-transcribed mRNA catabolic process, nonsense-mediated decay	biological_process	2	3079	19	36612	1.25167091160835	0.482907830177071	0.951788836620176	Gohir.D06G197400/Gohir.D09G004200
GO:0016717	oxidoreductase activity, acting on paired donors, with oxidation of a pair of donors resulting in the reduction of molecular oxygen to two molecules of water	molecular_function	2	3079	19	36612	1.25167091160835	0.482907830177071	0.951788836620176	Gohir.A01G137617/Gohir.A01G137630
GO:0035091	phosphatidylinositol binding	molecular_function	2	3079	19	36612	1.25167091160835	0.482907830177071	0.951788836620176	Gohir.A04G048400/Gohir.A06G098700
GO:0000139	Golgi membrane	cellular_component	3	3079	31	36612	1.15072970905929	0.490070885564359	0.951788836620176	Gohir.A07G146500/Gohir.A09G059050/Gohir.D07G152600
GO:0004089	carbonate dehydratase activity	molecular_function	3	3079	31	36612	1.15072970905929	0.490070885564359	0.951788836620176	Gohir.A04G070700/Gohir.A09G120775/Gohir.D04G099300
GO:0008081	phosphoric diester hydrolase activity	molecular_function	4	3079	43	36612	1.10612778235156	0.494024116113028	0.951788836620176	Gohir.A05G248533/Gohir.A06G118700/Gohir.A11G201350/Gohir.A12G038500
GO:0000077	DNA damage checkpoint	biological_process	1	3079	8	36612	1.48635920753491	0.504822228861727	0.951788836620176	Gohir.A06G107700
GO:0003725	double-stranded RNA binding	molecular_function	1	3079	8	36612	1.48635920753491	0.504822228861727	0.951788836620176	Gohir.D06G031200
GO:0003855	3-dehydroquinate dehydratase activity	molecular_function	1	3079	8	36612	1.48635920753491	0.504822228861727	0.951788836620176	Gohir.D09G060500
GO:0004407	histone deacetylase activity	molecular_function	1	3079	8	36612	1.48635920753491	0.504822228861727	0.951788836620176	Gohir.D09G093800
GO:0004527	exonuclease activity	molecular_function	1	3079	8	36612	1.48635920753491	0.504822228861727	0.951788836620176	Gohir.D13G108500
GO:0004764	shikimate 3-dehydrogenase (NADP+) activity	molecular_function	1	3079	8	36612	1.48635920753491	0.504822228861727	0.951788836620176	Gohir.D09G060500
GO:0004814	arginine-tRNA ligase activity	molecular_function	1	3079	8	36612	1.48635920753491	0.504822228861727	0.951788836620176	Gohir.D08G158401
GO:0006308	DNA catabolic process	biological_process	1	3079	8	36612	1.48635920753491	0.504822228861727	0.951788836620176	Gohir.D06G134250
GO:0006388	tRNA splicing, via endonucleolytic cleavage and ligation	biological_process	1	3079	8	36612	1.48635920753491	0.504822228861727	0.951788836620176	Gohir.A03G109301
GO:0006420	arginyl-tRNA aminoacylation	biological_process	1	3079	8	36612	1.48635920753491	0.504822228861727	0.951788836620176	Gohir.D08G158401
GO:0006515	protein quality control for misfolded or incompletely synthesized proteins	biological_process	1	3079	8	36612	1.48635920753491	0.504822228861727	0.951788836620176	Gohir.D08G181200
GO:0006623	protein targeting to vacuole	biological_process	1	3079	8	36612	1.48635920753491	0.504822228861727	0.951788836620176	Gohir.D03G134800
GO:0008839	4-hydroxy-tetrahydrodipicolinate reductase	molecular_function	1	3079	8	36612	1.48635920753491	0.504822228861727	0.951788836620176	Gohir.D09G040700
GO:0009584	detection of visible light	biological_process	1	3079	8	36612	1.48635920753491	0.504822228861727	0.951788836620176	Gohir.A11G261900
GO:0010087	phloem or xylem histogenesis	biological_process	1	3079	8	36612	1.48635920753491	0.504822228861727	0.951788836620176	Gohir.A10G123100
GO:0010207	photosystem II assembly	biological_process	1	3079	8	36612	1.48635920753491	0.504822228861727	0.951788836620176	Gohir.A12G137300
GO:0015969	guanosine tetraphosphate metabolic process	biological_process	1	3079	8	36612	1.48635920753491	0.504822228861727	0.951788836620176	Gohir.D13G160100
GO:0016149	translation release factor activity, codon specific	molecular_function	1	3079	8	36612	1.48635920753491	0.504822228861727	0.951788836620176	Gohir.A08G117100
GO:0016742	hydroxymethyl-, formyl- and related transferase activity	molecular_function	1	3079	8	36612	1.48635920753491	0.504822228861727	0.951788836620176	Gohir.A08G169100
GO:0017150	tRNA dihydrouridine synthase activity	molecular_function	1	3079	8	36612	1.48635920753491	0.504822228861727	0.951788836620176	Gohir.D13G107450
GO:0018298	protein-chromophore linkage	biological_process	1	3079	8	36612	1.48635920753491	0.504822228861727	0.951788836620176	Gohir.A11G261900
GO:0019239	deaminase activity	molecular_function	1	3079	8	36612	1.48635920753491	0.504822228861727	0.951788836620176	Gohir.D01G130900
GO:0033612	receptor serine/threonine kinase binding	molecular_function	1	3079	8	36612	1.48635920753491	0.504822228861727	0.951788836620176	Gohir.A10G123100
GO:0045168	cell-cell signaling involved in cell fate commitment	biological_process	1	3079	8	36612	1.48635920753491	0.504822228861727	0.951788836620176	Gohir.A01G142000
GO:0060548	negative regulation of cell death	biological_process	1	3079	8	36612	1.48635920753491	0.504822228861727	0.951788836620176	Gohir.D13G103300
GO:0089701	U2AF	cellular_component	1	3079	8	36612	1.48635920753491	0.504822228861727	0.951788836620176	Gohir.A03G081600
GO:0051287	NAD binding	molecular_function	11	3079	127	36612	1.02991819104781	0.505253932117754	0.951788836620176	Gohir.1Z049694/Gohir.A03G085101/Gohir.A03G134205/Gohir.A05G178000/Gohir.A07G145000/Gohir.A09G031100/Gohir.A12G147700/Gohir.A13G086335/Gohir.D06G129950/Gohir.D08G108108/Gohir.D11G334151
GO:0005525	GTP binding	molecular_function	49	3079	580	36612	1.00457380923049	0.508565828124052	0.951788836620176	Gohir.A01G095300/Gohir.A01G111100/Gohir.A01G142400/Gohir.A03G060300/Gohir.A03G078000/Gohir.A03G193900/Gohir.A04G050966/Gohir.A05G302500/Gohir.A05G345800/Gohir.A06G108400/Gohir.A06G133200/Gohir.A08G067500/Gohir.A08G086700/Gohir.A08G089400/Gohir.A08G120900/Gohir.A09G100300/Gohir.A09G125600/Gohir.A10G135900/Gohir.A10G207701/Gohir.A11G074000/Gohir.A11G212900/Gohir.A12G017032/Gohir.A12G037300/Gohir.A1…
GO:0004525	ribonuclease III activity	molecular_function	2	3079	20	36612	1.18908736602793	0.51056059122568	0.951788836620176	Gohir.A01G133600/Gohir.A11G154100
GO:0006487	protein N-linked glycosylation	biological_process	2	3079	20	36612	1.18908736602793	0.51056059122568	0.951788836620176	Gohir.A01G158900/Gohir.D01G151500
GO:0006614	SRP-dependent cotranslational protein targeting to membrane	biological_process	2	3079	20	36612	1.18908736602793	0.51056059122568	0.951788836620176	Gohir.A05G311500/Gohir.A08G188600
GO:0006821	chloride transport	biological_process	2	3079	20	36612	1.18908736602793	0.51056059122568	0.951788836620176	Gohir.A12G011800/Gohir.D13G131500
GO:0015095	magnesium ion transmembrane transporter activity	molecular_function	2	3079	20	36612	1.18908736602793	0.51056059122568	0.951788836620176	Gohir.A01G182300/Gohir.A12G038900
GO:0015914	phospholipid transport	biological_process	3	3079	32	36612	1.11476940565119	0.511729649811587	0.951788836620176	Gohir.A01G142401/Gohir.A05G358900/Gohir.A09G105900
GO:0016274	protein-arginine N-methyltransferase activity	molecular_function	3	3079	32	36612	1.11476940565119	0.511729649811587	0.951788836620176	Gohir.A03G112250/Gohir.D01G144700/Gohir.D08G102700
GO:0016844	strictosidine synthase activity	molecular_function	3	3079	32	36612	1.11476940565119	0.511729649811587	0.951788836620176	Gohir.A11G292081/Gohir.D01G044475/Gohir.D07G117900
GO:0030286	dynein complex	cellular_component	3	3079	32	36612	1.11476940565119	0.511729649811587	0.951788836620176	Gohir.A04G054932/Gohir.A09G213150/Gohir.A10G165700
GO:0016592	mediator complex	cellular_component	5	3079	57	36612	1.04305909300696	0.529048787094078	0.951788836620176	Gohir.A06G118600/Gohir.A07G161500/Gohir.D01G110850/Gohir.D06G122500/Gohir.D09G045050
GO:0046873	metal ion transmembrane transporter activity	molecular_function	5	3079	57	36612	1.04305909300696	0.529048787094078	0.951788836620176	Gohir.A04G073500/Gohir.A11G282913/Gohir.A13G133700/Gohir.D03G140400/Gohir.D11G162500
GO:0016798	hydrolase activity, acting on glycosyl bonds	molecular_function	3	3079	33	36612	1.08098851457085	0.532889634862482	0.951788836620176	Gohir.A08G092300/Gohir.A09G015751/Gohir.A09G015851
GO:0000290	deadenylation-dependent decapping of nuclear-transcribed mRNA	biological_process	2	3079	21	36612	1.13246415812184	0.537221071702982	0.951788836620176	Gohir.A07G081100/Gohir.D08G105950
GO:0004869	cysteine-type endopeptidase inhibitor activity	molecular_function	2	3079	21	36612	1.13246415812184	0.537221071702982	0.951788836620176	Gohir.A01G231300/Gohir.A06G154100
GO:0006904	vesicle docking involved in exocytosis	biological_process	2	3079	21	36612	1.13246415812184	0.537221071702982	0.951788836620176	Gohir.A09G003200/Gohir.D13G133033
GO:0006970	response to osmotic stress	biological_process	2	3079	21	36612	1.13246415812184	0.537221071702982	0.951788836620176	Gohir.A06G133800/Gohir.D01G040100
GO:0006995	cellular response to nitrogen starvation	biological_process	2	3079	21	36612	1.13246415812184	0.537221071702982	0.951788836620176	Gohir.A06G133800/Gohir.D01G040100
GO:0008408	3'-5' exonuclease activity	molecular_function	2	3079	21	36612	1.13246415812184	0.537221071702982	0.951788836620176	Gohir.A04G025700/Gohir.D04G189200
GO:0009959	negative gravitropism	biological_process	2	3079	21	36612	1.13246415812184	0.537221071702982	0.951788836620176	Gohir.A08G031400/Gohir.A11G080000
GO:0015098	molybdate ion transmembrane transporter activity	molecular_function	2	3079	21	36612	1.13246415812184	0.537221071702982	0.951788836620176	Gohir.A08G102200/Gohir.D08G113400
GO:0015689	molybdate ion transport	biological_process	2	3079	21	36612	1.13246415812184	0.537221071702982	0.951788836620176	Gohir.A08G102200/Gohir.D08G113400
GO:0017056	structural constituent of nuclear pore	molecular_function	2	3079	21	36612	1.13246415812184	0.537221071702982	0.951788836620176	Gohir.A03G115400/Gohir.A08G108000
GO:0003917	DNA topoisomerase type I (single strand cut, ATP-independent) activity	molecular_function	1	3079	9	36612	1.32120818447548	0.546474844896443	0.951788836620176	Gohir.A10G131800
GO:0004816	asparagine-tRNA ligase activity	molecular_function	1	3079	9	36612	1.32120818447548	0.546474844896443	0.951788836620176	Gohir.D06G068800
GO:0004827	proline-tRNA ligase activity	molecular_function	1	3079	9	36612	1.32120818447548	0.546474844896443	0.951788836620176	Gohir.D06G151800
GO:0006081	cellular aldehyde metabolic process	biological_process	1	3079	9	36612	1.32120818447548	0.546474844896443	0.951788836620176	Gohir.A06G045700
GO:0006366	transcription by RNA polymerase II	biological_process	1	3079	9	36612	1.32120818447548	0.546474844896443	0.951788836620176	Gohir.A05G258000
GO:0006421	asparaginyl-tRNA aminoacylation	biological_process	1	3079	9	36612	1.32120818447548	0.546474844896443	0.951788836620176	Gohir.D06G068800
GO:0006433	prolyl-tRNA aminoacylation	biological_process	1	3079	9	36612	1.32120818447548	0.546474844896443	0.951788836620176	Gohir.D06G151800
GO:0006561	proline biosynthetic process	biological_process	1	3079	9	36612	1.32120818447548	0.546474844896443	0.951788836620176	Gohir.A04G091000
GO:0006891	intra-Golgi vesicle-mediated transport	biological_process	1	3079	9	36612	1.32120818447548	0.546474844896443	0.951788836620176	Gohir.A04G049300
GO:0009072	aromatic amino acid family metabolic process	biological_process	1	3079	9	36612	1.32120818447548	0.546474844896443	0.951788836620176	Gohir.A07G080400
GO:0010390	histone monoubiquitination	biological_process	1	3079	9	36612	1.32120818447548	0.546474844896443	0.951788836620176	Gohir.A08G079500
GO:0031966	mitochondrial membrane	cellular_component	1	3079	9	36612	1.32120818447548	0.546474844896443	0.951788836620176	Gohir.D11G217400
GO:0046854	phosphatidylinositol phosphorylation	biological_process	1	3079	9	36612	1.32120818447548	0.546474844896443	0.951788836620176	Gohir.A12G090600
GO:0003777	microtubule motor activity	molecular_function	12	3079	143	36612	0.997835551911551	0.546773101963827	0.951788836620176	Gohir.A04G053900/Gohir.A04G079500/Gohir.A05G185600/Gohir.A05G204800/Gohir.A05G219500/Gohir.A08G118200/Gohir.A09G047800/Gohir.A09G194400/Gohir.A10G109600/Gohir.A10G164500/Gohir.A13G031200/Gohir.A13G110800
GO:0007018	microtubule-based movement	biological_process	12	3079	143	36612	0.997835551911551	0.546773101963827	0.951788836620176	Gohir.A04G053900/Gohir.A04G079500/Gohir.A05G185600/Gohir.A05G204800/Gohir.A05G219500/Gohir.A08G118200/Gohir.A09G047800/Gohir.A09G194400/Gohir.A10G109600/Gohir.A10G164500/Gohir.A13G031200/Gohir.A13G110800
GO:0042254	ribosome biogenesis	biological_process	4	3079	46	36612	1.03398901393733	0.548246842781805	0.951788836620176	Gohir.A05G316000/Gohir.A13G016000/Gohir.D04G067000/Gohir.D13G037150
GO:0003714	transcription corepressor activity	molecular_function	3	3079	34	36612	1.04919473473053	0.553520596495046	0.951788836620176	Gohir.A03G144200/Gohir.A11G205450/Gohir.A12G083600
GO:0008083	growth factor activity	molecular_function	3	3079	34	36612	1.04919473473053	0.553520596495046	0.951788836620176	Gohir.A03G107800/Gohir.A04G066114/Gohir.D08G102350
GO:0030127	COPII vesicle coat	cellular_component	3	3079	34	36612	1.04919473473053	0.553520596495046	0.951788836620176	Gohir.A06G045200/Gohir.A10G114113/Gohir.A12G093750
GO:0016702	oxidoreductase activity, acting on single donors with incorporation of molecular oxygen, incorporation of two atoms of oxygen	molecular_function	6	3079	71	36612	1.00486256284051	0.556707538692882	0.951788836620176	Gohir.A06G137900/Gohir.A13G152200/Gohir.D08G227100/Gohir.D08G227200/Gohir.D13G108066/Gohir.D13G111000
GO:0016301	kinase activity	molecular_function	9	3079	108	36612	0.990906138356609	0.561626504123659	0.951788836620176	Gohir.A08G061100/Gohir.A09G035100/Gohir.A10G105700/Gohir.A10G113900/Gohir.A12G035900/Gohir.A12G090600/Gohir.A13G095700/Gohir.D13G058925/Gohir.D13G089700
GO:0030145	manganese ion binding	molecular_function	9	3079	108	36612	0.990906138356609	0.561626504123659	0.951788836620176	Gohir.A01G156900/Gohir.A04G025700/Gohir.A04G068828/Gohir.A12G195100/Gohir.D01G153400/Gohir.D04G098266/Gohir.D11G251500/Gohir.D11G251800/Gohir.D11G253800
GO:0000105	histidine biosynthetic process	biological_process	2	3079	22	36612	1.08098851457085	0.562860554358611	0.951788836620176	Gohir.A04G062600/Gohir.A09G051200
GO:0009742	brassinosteroid mediated signaling pathway	biological_process	2	3079	22	36612	1.08098851457085	0.562860554358611	0.951788836620176	Gohir.A03G116700/Gohir.A04G095200
GO:0012511	monolayer-surrounded lipid storage body	cellular_component	2	3079	22	36612	1.08098851457085	0.562860554358611	0.951788836620176	Gohir.A09G028800/Gohir.A10G102500
GO:0015693	magnesium ion transport	biological_process	2	3079	22	36612	1.08098851457085	0.562860554358611	0.951788836620176	Gohir.A01G182300/Gohir.A12G038900
GO:0030008	TRAPP complex	cellular_component	2	3079	22	36612	1.08098851457085	0.562860554358611	0.951788836620176	Gohir.A05G345101/Gohir.D09G115300
GO:0032259	methylation	biological_process	2	3079	22	36612	1.08098851457085	0.562860554358611	0.951788836620176	Gohir.A08G076400/Gohir.A10G117300
GO:0047262	polygalacturonate 4-alpha-galacturonosyltransferase activity	molecular_function	4	3079	47	36612	1.01198924768335	0.565632998961822	0.951788836620176	Gohir.A07G092700/Gohir.A07G161700/Gohir.D08G070800/Gohir.D08G149800
GO:0003924	GTPase activity	molecular_function	34	3079	412	36612	0.981285690411399	0.572050614094193	0.951788836620176	Gohir.A01G095300/Gohir.A01G111100/Gohir.A01G142400/Gohir.A03G060300/Gohir.A03G078000/Gohir.A03G193900/Gohir.A05G302500/Gohir.A05G345800/Gohir.A06G108400/Gohir.A06G133200/Gohir.A09G100300/Gohir.A09G125600/Gohir.A10G135900/Gohir.A10G207701/Gohir.A11G074000/Gohir.A12G037300/Gohir.A12G076800/Gohir.A12G092466/Gohir.A13G090400/Gohir.D01G079500/Gohir.D01G097800/Gohir.D03G067600/Gohir.D04G065100/Gohir.D0…
GO:0004427	inorganic diphosphatase activity	molecular_function	3	3079	35	36612	1.01921774230966	0.573597613592824	0.951788836620176	Gohir.A06G116100/Gohir.D06G120900/Gohir.D13G115033
GO:0008536	Ran GTPase binding	molecular_function	3	3079	35	36612	1.01921774230966	0.573597613592824	0.951788836620176	Gohir.A07G137000/Gohir.A10G136400/Gohir.D09G180000
GO:0000220	vacuolar proton-transporting V-type ATPase, V0 domain	cellular_component	1	3079	10	36612	1.18908736602793	0.584624831306406	0.951788836620176	Gohir.A01G113400
GO:0000808	origin recognition complex	cellular_component	1	3079	10	36612	1.18908736602793	0.584624831306406	0.951788836620176	Gohir.A13G000300
GO:0000922	spindle pole	cellular_component	1	3079	10	36612	1.18908736602793	0.584624831306406	0.951788836620176	Gohir.A04G057400
GO:0004129	cytochrome-c oxidase activity	molecular_function	1	3079	10	36612	1.18908736602793	0.584624831306406	0.951788836620176	Gohir.D06G123400
GO:0004367	glycerol-3-phosphate dehydrogenase [NAD+] activity	molecular_function	1	3079	10	36612	1.18908736602793	0.584624831306406	0.951788836620176	Gohir.A09G031100
GO:0004550	nucleoside diphosphate kinase activity	molecular_function	1	3079	10	36612	1.18908736602793	0.584624831306406	0.951788836620176	Gohir.A06G143750
GO:0004556	alpha-amylase activity	molecular_function	1	3079	10	36612	1.18908736602793	0.584624831306406	0.951788836620176	Gohir.A05G202200
GO:0004652	polynucleotide adenylyltransferase activity	molecular_function	1	3079	10	36612	1.18908736602793	0.584624831306406	0.951788836620176	Gohir.A09G176100
GO:0004751	ribose-5-phosphate isomerase activity	molecular_function	1	3079	10	36612	1.18908736602793	0.584624831306406	0.951788836620176	Gohir.A12G150100
GO:0004807	triose-phosphate isomerase activity	molecular_function	1	3079	10	36612	1.18908736602793	0.584624831306406	0.951788836620176	Gohir.A08G000400
GO:0005750	mitochondrial respiratory chain complex III	cellular_component	1	3079	10	36612	1.18908736602793	0.584624831306406	0.951788836620176	Gohir.A01G138200
GO:0005815	microtubule organizing center	cellular_component	1	3079	10	36612	1.18908736602793	0.584624831306406	0.951788836620176	Gohir.A04G057400
GO:0006165	nucleoside diphosphate phosphorylation	biological_process	1	3079	10	36612	1.18908736602793	0.584624831306406	0.951788836620176	Gohir.A06G143750
GO:0006183	GTP biosynthetic process	biological_process	1	3079	10	36612	1.18908736602793	0.584624831306406	0.951788836620176	Gohir.A06G143750
GO:0006228	UTP biosynthetic process	biological_process	1	3079	10	36612	1.18908736602793	0.584624831306406	0.951788836620176	Gohir.A06G143750
GO:0006241	CTP biosynthetic process	biological_process	1	3079	10	36612	1.18908736602793	0.584624831306406	0.951788836620176	Gohir.A06G143750
GO:0006353	DNA-templated transcription, termination	biological_process	1	3079	10	36612	1.18908736602793	0.584624831306406	0.951788836620176	Gohir.D01G119650
GO:0007005	mitochondrion organization	biological_process	1	3079	10	36612	1.18908736602793	0.584624831306406	0.951788836620176	Gohir.D11G190100
GO:0007623	circadian rhythm	biological_process	1	3079	10	36612	1.18908736602793	0.584624831306406	0.951788836620176	Gohir.A05G393800
GO:0008420	RNA polymerase II CTD heptapeptide repeat phosphatase activity	molecular_function	1	3079	10	36612	1.18908736602793	0.584624831306406	0.951788836620176	Gohir.A03G155800
GO:0009052	pentose-phosphate shunt, non-oxidative branch	biological_process	1	3079	10	36612	1.18908736602793	0.584624831306406	0.951788836620176	Gohir.A12G150100
GO:0009143	nucleoside triphosphate catabolic process	biological_process	1	3079	10	36612	1.18908736602793	0.584624831306406	0.951788836620176	Gohir.A10G110000
GO:0009415	response to water	biological_process	1	3079	10	36612	1.18908736602793	0.584624831306406	0.951788836620176	Gohir.A12G035100
GO:0009786	regulation of asymmetric cell division	biological_process	1	3079	10	36612	1.18908736602793	0.584624831306406	0.951788836620176	Gohir.A13G088100
GO:0010227	floral organ abscission	biological_process	1	3079	10	36612	1.18908736602793	0.584624831306406	0.951788836620176	Gohir.A12G172600
GO:0016575	histone deacetylation	biological_process	1	3079	10	36612	1.18908736602793	0.584624831306406	0.951788836620176	Gohir.D09G093800
GO:0016639	oxidoreductase activity, acting on the CH-NH2 group of donors, NAD or NADP as acceptor	molecular_function	1	3079	10	36612	1.18908736602793	0.584624831306406	0.951788836620176	Gohir.A12G212900
GO:0017119	Golgi transport complex	cellular_component	1	3079	10	36612	1.18908736602793	0.584624831306406	0.951788836620176	Gohir.A04G049300
GO:0031123	RNA 3'-end processing	biological_process	1	3079	10	36612	1.18908736602793	0.584624831306406	0.951788836620176	Gohir.A09G176100
GO:0043631	RNA polyadenylation	biological_process	1	3079	10	36612	1.18908736602793	0.584624831306406	0.951788836620176	Gohir.A09G176100
GO:0046168	glycerol-3-phosphate catabolic process	biological_process	1	3079	10	36612	1.18908736602793	0.584624831306406	0.951788836620176	Gohir.A09G031100
GO:0070940	dephosphorylation of RNA polymerase II C-terminal domain	biological_process	1	3079	10	36612	1.18908736602793	0.584624831306406	0.951788836620176	Gohir.A03G155800
GO:0080019	fatty-acyl-CoA reductase (alcohol-forming) activity	molecular_function	1	3079	10	36612	1.18908736602793	0.584624831306406	0.951788836620176	Gohir.D09G094500
GO:0004601	peroxidase activity	molecular_function	16	3079	196	36612	0.970683564104434	0.587042051391518	0.951788836620176	Gohir.1Z049361/Gohir.1Z049547/Gohir.A01G142201/Gohir.A01G142301/Gohir.A01G143600/Gohir.A04G075400/Gohir.A06G098220/Gohir.A06G111202/Gohir.A08G078800/Gohir.A09G061300/Gohir.A12G195200/Gohir.D01G133700/Gohir.D03G071102/Gohir.D08G088600/Gohir.D09G060200/Gohir.D09G213600
GO:0000079	regulation of cyclin-dependent protein serine/threonine kinase activity	biological_process	2	3079	23	36612	1.03398901393733	0.587462165011064	0.951788836620176	Gohir.A08G137300/Gohir.D08G075500
GO:0005385	zinc ion transmembrane transporter activity	molecular_function	2	3079	23	36612	1.03398901393733	0.587462165011064	0.951788836620176	Gohir.D03G140400/Gohir.D11G162500
GO:0005667	transcription factor complex	cellular_component	2	3079	23	36612	1.03398901393733	0.587462165011064	0.951788836620176	Gohir.A08G095300/Gohir.D08G106800
GO:0008271	secondary active sulfate transmembrane transporter activity	molecular_function	2	3079	23	36612	1.03398901393733	0.587462165011064	0.951788836620176	Gohir.A01G151436/Gohir.A10G115900
GO:0008272	sulfate transport	biological_process	2	3079	23	36612	1.03398901393733	0.587462165011064	0.951788836620176	Gohir.A01G151436/Gohir.A10G115900
GO:0008283	cell population proliferation	biological_process	2	3079	23	36612	1.03398901393733	0.587462165011064	0.951788836620176	Gohir.A03G107800/Gohir.A04G066114
GO:0015116	sulfate transmembrane transporter activity	molecular_function	2	3079	23	36612	1.03398901393733	0.587462165011064	0.951788836620176	Gohir.A01G151436/Gohir.A10G115900
GO:0016157	sucrose synthase activity	molecular_function	2	3079	23	36612	1.03398901393733	0.587462165011064	0.951788836620176	Gohir.A06G079600/Gohir.D08G139000
GO:0071577	zinc ion transmembrane transport	biological_process	2	3079	23	36612	1.03398901393733	0.587462165011064	0.951788836620176	Gohir.D03G140400/Gohir.D11G162500
GO:0004650	polygalacturonase activity	molecular_function	11	3079	135	36612	0.968886001948685	0.588715664084703	0.951788836620176	Gohir.A04G015500/Gohir.A04G015800/Gohir.A07G082700/Gohir.A07G086700/Gohir.A07G167900/Gohir.A08G121600/Gohir.A09G021101/Gohir.D03G065600/Gohir.D03G065700/Gohir.D09G026400/Gohir.D11G230900
GO:0015031	protein transport	biological_process	11	3079	135	36612	0.968886001948685	0.588715664084703	0.951788836620176	Gohir.A01G119300/Gohir.A03G097101/Gohir.A05G248700/Gohir.A06G062200/Gohir.A06G124202/Gohir.A10G130100/Gohir.A11G225200/Gohir.A12G138000/Gohir.A13G194600/Gohir.D11G218000/Gohir.D11G229300
GO:0016757	transferase activity, transferring glycosyl groups	molecular_function	19	3079	233	36612	0.969642058134364	0.590365404759263	0.951788836620176	Gohir.A01G160600/Gohir.A05G025500/Gohir.A05G106900/Gohir.A07G092700/Gohir.A07G160600/Gohir.A07G161700/Gohir.A07G162800/Gohir.A08G094700/Gohir.A10G082400/Gohir.A10G129300/Gohir.D03G061300/Gohir.D03G069705/Gohir.D05G271700/Gohir.D06G065800/Gohir.D07G169500/Gohir.D08G070800/Gohir.D08G149800/Gohir.D09G052000/Gohir.D11G239300
GO:0004175	endopeptidase activity	molecular_function	3	3079	36	36612	0.990906138356609	0.593100683697935	0.951788836620176	Gohir.A01G114600/Gohir.A01G160500/Gohir.A06G143600
GO:0030042	actin filament depolymerization	biological_process	3	3079	36	36612	0.990906138356609	0.593100683697935	0.951788836620176	Gohir.A01G166900/Gohir.A01G220300/Gohir.A07G148500
GO:0030126	COPI vesicle coat	cellular_component	3	3079	36	36612	0.990906138356609	0.593100683697935	0.951788836620176	Gohir.A11G227300/Gohir.A12G070200/Gohir.D11G230000
GO:0044237	cellular metabolic process	biological_process	3	3079	36	36612	0.990906138356609	0.593100683697935	0.951788836620176	Gohir.A05G306101/Gohir.A10G084400/Gohir.D04G189200
GO:0008324	cation transmembrane transporter activity	molecular_function	4	3079	49	36612	0.970683564104434	0.599260641152422	0.951788836620176	Gohir.A04G053242/Gohir.A06G115900/Gohir.D04G088900/Gohir.D06G120700
GO:0006352	DNA-templated transcription, initiation	biological_process	5	3079	62	36612	0.958941424216074	0.605378819215322	0.951788836620176	Gohir.A04G072600/Gohir.A06G090600/Gohir.A10G084400/Gohir.D06G089600/Gohir.D11G163900
GO:0005985	sucrose metabolic process	biological_process	2	3079	24	36612	0.990906138356609	0.611019084815892	0.951788836620176	Gohir.A06G079600/Gohir.D08G139000
GO:0007186	G protein-coupled receptor signaling pathway	biological_process	2	3079	24	36612	0.990906138356609	0.611019084815892	0.951788836620176	Gohir.A10G117266/Gohir.D08G071900
GO:0009690	cytokinin metabolic process	biological_process	2	3079	24	36612	0.990906138356609	0.611019084815892	0.951788836620176	Gohir.A06G081700/Gohir.D06G071500
GO:0019139	cytokinin dehydrogenase activity	molecular_function	2	3079	24	36612	0.990906138356609	0.611019084815892	0.951788836620176	Gohir.A06G081700/Gohir.D06G071500
GO:0070569	uridylyltransferase activity	molecular_function	2	3079	24	36612	0.990906138356609	0.611019084815892	0.951788836620176	Gohir.D09G041125/Gohir.D11G184600
GO:0006357	regulation of transcription by RNA polymerase II	biological_process	8	3079	100	36612	0.951269892822345	0.611083597736205	0.951788836620176	Gohir.A01G127800/Gohir.A03G096500/Gohir.A05G299200/Gohir.A07G161500/Gohir.A09G067900/Gohir.D01G110850/Gohir.D01G119300/Gohir.D01G170901
GO:0007275	multicellular organism development	biological_process	4	3079	50	36612	0.951269892822345	0.615473558454563	0.951788836620176	Gohir.A03G105600/Gohir.A05G281100/Gohir.D01G125000/Gohir.D08G107200
GO:0000502	proteasome complex	cellular_component	1	3079	11	36612	1.08098851457085	0.619566641710416	0.951788836620176	Gohir.A12G139150
GO:0001510	RNA methylation	biological_process	1	3079	11	36612	1.08098851457085	0.619566641710416	0.951788836620176	Gohir.A06G119600
GO:0004176	ATP-dependent peptidase activity	molecular_function	1	3079	11	36612	1.08098851457085	0.619566641710416	0.951788836620176	Gohir.D08G181200
GO:0005094	Rho GDP-dissociation inhibitor activity	molecular_function	1	3079	11	36612	1.08098851457085	0.619566641710416	0.951788836620176	Gohir.D07G195600
GO:0007030	Golgi organization	biological_process	1	3079	11	36612	1.08098851457085	0.619566641710416	0.951788836620176	Gohir.A12G268700
GO:0008097	5S rRNA binding	molecular_function	1	3079	11	36612	1.08098851457085	0.619566641710416	0.951788836620176	Gohir.A12G069800
GO:0016836	hydro-lyase activity	molecular_function	1	3079	11	36612	1.08098851457085	0.619566641710416	0.951788836620176	Gohir.A10G085700
GO:0016891	endoribonuclease activity, producing 5'-phosphomonoesters	molecular_function	1	3079	11	36612	1.08098851457085	0.619566641710416	0.951788836620176	Gohir.A01G133600
GO:0030123	AP-3 adaptor complex	cellular_component	1	3079	11	36612	1.08098851457085	0.619566641710416	0.951788836620176	Gohir.A05G301800
GO:0032886	regulation of microtubule-based process	biological_process	1	3079	11	36612	1.08098851457085	0.619566641710416	0.951788836620176	Gohir.A09G194400
GO:0042176	regulation of protein catabolic process	biological_process	1	3079	11	36612	1.08098851457085	0.619566641710416	0.951788836620176	Gohir.A12G139150
GO:0045040	protein insertion into mitochondrial outer membrane	biological_process	1	3079	11	36612	1.08098851457085	0.619566641710416	0.951788836620176	Gohir.A03G126500
GO:0045300	acyl-[acyl-carrier-protein] desaturase activity	molecular_function	1	3079	11	36612	1.08098851457085	0.619566641710416	0.951788836620176	Gohir.D05G271700
GO:0046621	negative regulation of organ growth	biological_process	1	3079	11	36612	1.08098851457085	0.619566641710416	0.951788836620176	Gohir.A12G070400
GO:0051013	microtubule severing	biological_process	1	3079	11	36612	1.08098851457085	0.619566641710416	0.951788836620176	Gohir.D03G073400
GO:0051377	mannose-ethanolamine phosphotransferase activity	molecular_function	1	3079	11	36612	1.08098851457085	0.619566641710416	0.951788836620176	Gohir.D07G225200
GO:0003680	AT DNA binding	molecular_function	7	3079	89	36612	0.935237254179272	0.628996361362637	0.951788836620176	Gohir.A01G140100/Gohir.A03G001500/Gohir.A04G066600/Gohir.A05G071100/Gohir.A08G133400/Gohir.D03G159400/Gohir.D11G261400
GO:0007064	mitotic sister chromatid cohesion	biological_process	2	3079	25	36612	0.951269892822345	0.633532979309584	0.951788836620176	Gohir.D03G146000/Gohir.D08G059050
GO:0034968	histone lysine methylation	biological_process	2	3079	25	36612	0.951269892822345	0.633532979309584	0.951788836620176	Gohir.A03G060600/Gohir.A05G334400
GO:0006397	mRNA processing	biological_process	6	3079	77	36612	0.926561583917868	0.637142770575751	0.951788836620176	Gohir.A04G039120/Gohir.A04G039150/Gohir.A06G114800/Gohir.A08G070362/Gohir.A08G095662/Gohir.D06G123100
GO:0003678	DNA helicase activity	molecular_function	3	3079	39	36612	0.914682589252255	0.648031701226933	0.951788836620176	Gohir.A03G121000/Gohir.D11G114800/Gohir.D11G222214
GO:0030163	protein catabolic process	biological_process	3	3079	39	36612	0.914682589252255	0.648031701226933	0.951788836620176	Gohir.A06G194800/Gohir.A11G226900/Gohir.D08G181200
GO:0003857	3-hydroxyacyl-CoA dehydrogenase activity	molecular_function	1	3079	12	36612	0.990906138356609	0.651569983427135	0.951788836620176	Gohir.A06G064100
GO:0004066	asparagine synthase (glutamine-hydrolyzing) activity	molecular_function	1	3079	12	36612	0.990906138356609	0.651569983427135	0.951788836620176	Gohir.A12G087900
GO:0004478	methionine adenosyltransferase activity	molecular_function	1	3079	12	36612	0.990906138356609	0.651569983427135	0.951788836620176	Gohir.D04G110400
GO:0004559	alpha-mannosidase activity	molecular_function	1	3079	12	36612	0.990906138356609	0.651569983427135	0.951788836620176	Gohir.A03G056250
GO:0004664	prephenate dehydratase activity	molecular_function	1	3079	12	36612	0.990906138356609	0.651569983427135	0.951788836620176	Gohir.A09G093300
GO:0004675	transmembrane receptor protein serine/threonine kinase activity	molecular_function	1	3079	12	36612	0.990906138356609	0.651569983427135	0.951788836620176	Gohir.D06G113500
GO:0004866	endopeptidase inhibitor activity	molecular_function	1	3079	12	36612	0.990906138356609	0.651569983427135	0.951788836620176	Gohir.A09G051800
GO:0005102	signaling receptor binding	molecular_function	1	3079	12	36612	0.990906138356609	0.651569983427135	0.951788836620176	Gohir.D06G113500
GO:0005680	anaphase-promoting complex	cellular_component	1	3079	12	36612	0.990906138356609	0.651569983427135	0.951788836620176	Gohir.A08G199200
GO:0006013	mannose metabolic process	biological_process	1	3079	12	36612	0.990906138356609	0.651569983427135	0.951788836620176	Gohir.A03G056250
GO:0006406	mRNA export from nucleus	biological_process	1	3079	12	36612	0.990906138356609	0.651569983427135	0.951788836620176	Gohir.A03G077100
GO:0006529	asparagine biosynthetic process	biological_process	1	3079	12	36612	0.990906138356609	0.651569983427135	0.951788836620176	Gohir.A12G087900
GO:0006556	S-adenosylmethionine biosynthetic process	biological_process	1	3079	12	36612	0.990906138356609	0.651569983427135	0.951788836620176	Gohir.D04G110400
GO:0009094	L-phenylalanine biosynthetic process	biological_process	1	3079	12	36612	0.990906138356609	0.651569983427135	0.951788836620176	Gohir.A09G093300
GO:0010112	regulation of systemic acquired resistance	biological_process	1	3079	12	36612	0.990906138356609	0.651569983427135	0.951788836620176	Gohir.D08G142200
GO:0019441	tryptophan catabolic process to kynurenine	biological_process	1	3079	12	36612	0.990906138356609	0.651569983427135	0.951788836620176	Gohir.A05G303900
GO:0030234	enzyme regulator activity	molecular_function	1	3079	12	36612	0.990906138356609	0.651569983427135	0.951788836620176	Gohir.A12G139150
GO:0051260	protein homooligomerization	biological_process	1	3079	12	36612	0.990906138356609	0.651569983427135	0.951788836620176	Gohir.D08G236500
GO:1900150	regulation of defense response to fungus	biological_process	1	3079	12	36612	0.990906138356609	0.651569983427135	0.951788836620176	Gohir.D07G144300
GO:0009116	nucleoside metabolic process	biological_process	2	3079	26	36612	0.914682589252255	0.65501262042994	0.951788836620176	Gohir.A07G005000/Gohir.A13G086600
GO:0047617	acyl-CoA hydrolase activity	molecular_function	2	3079	26	36612	0.914682589252255	0.65501262042994	0.951788836620176	Gohir.A09G082000/Gohir.D08G151100
GO:0005992	trehalose biosynthetic process	biological_process	3	3079	40	36612	0.891815524520948	0.665123669398584	0.951788836620176	Gohir.A08G087400/Gohir.A11G200216/Gohir.D09G079400
GO:0051082	unfolded protein binding	molecular_function	10	3079	131	36612	0.907700279410634	0.671350933724569	0.951788836620176	Gohir.A05G286200/Gohir.A06G045800/Gohir.A06G113200/Gohir.A08G053500/Gohir.D01G100600/Gohir.D06G046300/Gohir.D06G149200/Gohir.D07G050300/Gohir.D08G063000/Gohir.D11G115700
GO:0004252	serine-type endopeptidase activity	molecular_function	18	3079	232	36612	0.922567783987188	0.674178392553633	0.951788836620176	Gohir.1Z050580/Gohir.A05G285000/Gohir.A06G122500/Gohir.A06G129500/Gohir.A08G099300/Gohir.A08G246101/Gohir.A09G043300/Gohir.A09G045346/Gohir.A09G094700/Gohir.A10G147200/Gohir.A12G090500/Gohir.A12G229201/Gohir.D04G000090/Gohir.D06G018300/Gohir.D08G062300/Gohir.D08G181200/Gohir.D09G093050/Gohir.D13G227150
GO:0004177	aminopeptidase activity	molecular_function	2	3079	27	36612	0.880805456316986	0.675472680181596	0.951788836620176	Gohir.A03G062000/Gohir.D11G161700
GO:0005089	Rho guanyl-nucleotide exchange factor activity	molecular_function	2	3079	27	36612	0.880805456316986	0.675472680181596	0.951788836620176	Gohir.A01G171800/Gohir.A08G148100
GO:0006486	protein glycosylation	biological_process	13	3079	170	36612	0.909302103433124	0.680166630970309	0.951788836620176	Gohir.1Z049449/Gohir.A01G160600/Gohir.A03G075800/Gohir.A05G025500/Gohir.A05G106900/Gohir.A07G162800/Gohir.A08G094700/Gohir.A10G129300/Gohir.A12G027900/Gohir.A13G094800/Gohir.D07G169500/Gohir.D09G014600/Gohir.D11G239300
GO:0000015	phosphopyruvate hydratase complex	cellular_component	1	3079	13	36612	0.914682589252255	0.680881896569972	0.951788836620176	Gohir.D03G100000
GO:0004325	ferrochelatase activity	molecular_function	1	3079	13	36612	0.914682589252255	0.680881896569972	0.951788836620176	Gohir.D11G232400
GO:0004345	glucose-6-phosphate dehydrogenase activity	molecular_function	1	3079	13	36612	0.914682589252255	0.680881896569972	0.951788836620176	Gohir.A05G341600
GO:0004420	hydroxymethylglutaryl-CoA reductase (NADPH) activity	molecular_function	1	3079	13	36612	0.914682589252255	0.680881896569972	0.951788836620176	Gohir.D13G057851
GO:0004634	phosphopyruvate hydratase activity	molecular_function	1	3079	13	36612	0.914682589252255	0.680881896569972	0.951788836620176	Gohir.D03G100000
GO:0004867	serine-type endopeptidase inhibitor activity	molecular_function	1	3079	13	36612	0.914682589252255	0.680881896569972	0.951788836620176	Gohir.A04G084100
GO:0006526	arginine biosynthetic process	biological_process	1	3079	13	36612	0.914682589252255	0.680881896569972	0.951788836620176	Gohir.D13G122400
GO:0006783	heme biosynthetic process	biological_process	1	3079	13	36612	0.914682589252255	0.680881896569972	0.951788836620176	Gohir.D11G232400
GO:0008131	primary amine oxidase activity	molecular_function	1	3079	13	36612	0.914682589252255	0.680881896569972	0.951788836620176	Gohir.A12G144700
GO:0009308	amine metabolic process	biological_process	1	3079	13	36612	0.914682589252255	0.680881896569972	0.951788836620176	Gohir.A12G144700
GO:0009611	response to wounding	biological_process	1	3079	13	36612	0.914682589252255	0.680881896569972	0.951788836620176	Gohir.A04G084100
GO:0009909	regulation of flower development	biological_process	1	3079	13	36612	0.914682589252255	0.680881896569972	0.951788836620176	Gohir.A07G098700
GO:0015936	coenzyme A metabolic process	biological_process	1	3079	13	36612	0.914682589252255	0.680881896569972	0.951788836620176	Gohir.D13G057851
GO:0016036	cellular response to phosphate starvation	biological_process	1	3079	13	36612	0.914682589252255	0.680881896569972	0.951788836620176	Gohir.D07G212400
GO:0030173	integral component of Golgi membrane	cellular_component	1	3079	13	36612	0.914682589252255	0.680881896569972	0.951788836620176	Gohir.D11G218000
GO:0043015	gamma-tubulin binding	molecular_function	1	3079	13	36612	0.914682589252255	0.680881896569972	0.951788836620176	Gohir.A04G057400
GO:0097428	protein maturation by iron-sulfur cluster transfer	biological_process	1	3079	13	36612	0.914682589252255	0.680881896569972	0.951788836620176	Gohir.A01G200100
GO:0051537	2 iron, 2 sulfur cluster binding	molecular_function	3	3079	41	36612	0.870063926361901	0.681601980844142	0.951788836620176	Gohir.A05G306101/Gohir.A09G216000/Gohir.A13G222600
GO:0005789	endoplasmic reticulum membrane	cellular_component	6	3079	81	36612	0.880805456316986	0.685641048782007	0.951788836620176	Gohir.A05G322500/Gohir.A06G127400/Gohir.A10G101715/Gohir.A12G101000/Gohir.D07G225200/Gohir.D08G124100
GO:0016579	protein deubiquitination	biological_process	6	3079	81	36612	0.880805456316986	0.685641048782007	0.951788836620176	Gohir.A06G032616/Gohir.A09G101100/Gohir.A10G195000/Gohir.D03G073200/Gohir.D03G090700/Gohir.D13G187400
GO:0009733	response to auxin	biological_process	15	3079	196	36612	0.910015841347906	0.686143212929551	0.951788836620176	Gohir.A01G111700/Gohir.A01G149218/Gohir.A04G061700/Gohir.A12G141000/Gohir.A13G097990/Gohir.A13G098700/Gohir.A13G122200/Gohir.D01G098600/Gohir.D03G160400/Gohir.D04G105550/Gohir.D06G121000/Gohir.D08G114900/Gohir.D09G005600/Gohir.D09G144300/Gohir.D13G090400
GO:0005618	cell wall	cellular_component	4	3079	55	36612	0.864790811656677	0.690159241230881	0.951788836620176	Gohir.A11G229300/Gohir.A12G079400/Gohir.D03G050800/Gohir.D08G095200
GO:0006073	cellular glucan metabolic process	biological_process	4	3079	55	36612	0.864790811656677	0.690159241230881	0.951788836620176	Gohir.A11G229300/Gohir.A12G079400/Gohir.D03G050800/Gohir.D08G095200
GO:0003676	nucleic acid binding	molecular_function	92	3079	1145	36612	0.955423909821569	0.69430981103259	0.951788836620176	Gohir.A01G122600/Gohir.A01G126100/Gohir.A01G128000/Gohir.A01G137552/Gohir.A01G141452/Gohir.A01G154550/Gohir.A01G156200/Gohir.A01G165700/Gohir.A03G070100/Gohir.A03G070300/Gohir.A03G080150/Gohir.A03G080800/Gohir.A03G121000/Gohir.A04G051600/Gohir.A04G053826/Gohir.A04G054300/Gohir.A04G054700/Gohir.A04G058126/Gohir.A04G060726/Gohir.A04G065614/Gohir.A04G067714/Gohir.A04G068100/Gohir.A05G308150/Gohir.A0…
GO:0004519	endonuclease activity	molecular_function	2	3079	28	36612	0.849348118591379	0.694932676836676	0.951788836620176	Gohir.A04G025700/Gohir.D06G134250
GO:0006338	chromatin remodeling	biological_process	2	3079	28	36612	0.849348118591379	0.694932676836676	0.951788836620176	Gohir.A10G161000/Gohir.D08G141300
GO:0140326	ATPase-coupled intramembrane lipid transporter activity	molecular_function	2	3079	28	36612	0.849348118591379	0.694932676836676	0.951788836620176	Gohir.A01G142401/Gohir.A05G358900
GO:0046872	metal ion binding	molecular_function	51	3079	644	36612	0.941668566264355	0.6950137207954	0.951788836620176	Gohir.1Z050180/Gohir.A01G019300/Gohir.A01G131500/Gohir.A01G134100/Gohir.A01G134150/Gohir.A01G139613/Gohir.A01G145836/Gohir.A01G168700/Gohir.A03G070700/Gohir.A03G087300/Gohir.A03G099900/Gohir.A05G303900/Gohir.A05G343800/Gohir.A06G094000/Gohir.A07G049700/Gohir.A07G104433/Gohir.A07G140100/Gohir.A07G222600/Gohir.A08G064900/Gohir.A08G073500/Gohir.A08G083400/Gohir.A08G108700/Gohir.A08G145200/Gohir.A09G…
GO:0006310	DNA recombination	biological_process	3	3079	42	36612	0.849348118591379	0.697468260428588	0.951788836620176	Gohir.A01G156200/Gohir.A03G070300/Gohir.A03G121000
GO:0000413	protein peptidyl-prolyl isomerization	biological_process	5	3079	69	36612	0.861657511614443	0.699228330557919	0.951788836620176	Gohir.A01G164200/Gohir.A03G099700/Gohir.A04G122701/Gohir.A07G038100/Gohir.A13G103900
GO:0005524	ATP binding	molecular_function	346	3079	4216	36612	0.975863919937534	0.701879504840494	0.951788836620176	Gohir.1Z047500/Gohir.1Z049478/Gohir.1Z049573/Gohir.1Z049617/Gohir.1Z049799/Gohir.1Z049992/Gohir.1Z050092/Gohir.1Z050492/Gohir.A01G001900/Gohir.A01G037900/Gohir.A01G070500/Gohir.A01G099800/Gohir.A01G104700/Gohir.A01G109000/Gohir.A01G118333/Gohir.A01G121300/Gohir.A01G131111/Gohir.A01G136850/Gohir.A01G140465/Gohir.A01G140607/Gohir.A01G141700/Gohir.A01G142401/Gohir.A01G142700/Gohir.A01G144276/Gohir.A…
GO:0042546	cell wall biogenesis	biological_process	4	3079	56	36612	0.849348118591379	0.703786852449927	0.951788836620176	Gohir.A11G229300/Gohir.A12G079400/Gohir.D03G050800/Gohir.D08G095200
GO:0000398	mRNA splicing, via spliceosome	biological_process	7	3079	96	36612	0.867042871062033	0.706784230669226	0.951788836620176	Gohir.A03G081600/Gohir.A08G095200/Gohir.A09G227600/Gohir.A10G111100/Gohir.A11G200232/Gohir.D07G176600/Gohir.D13G134400
GO:0006418	tRNA aminoacylation for protein translation	biological_process	7	3079	96	36612	0.867042871062033	0.706784230669226	0.951788836620176	Gohir.A10G142700/Gohir.A11G237100/Gohir.D01G037300/Gohir.D06G068800/Gohir.D09G127750/Gohir.D11G247600/Gohir.D13G190966
GO:0005784	Sec61 translocon complex	cellular_component	1	3079	14	36612	0.849348118591379	0.707728658515956	0.951788836620176	Gohir.A08G137366
GO:0005956	protein kinase CK2 complex	cellular_component	1	3079	14	36612	0.849348118591379	0.707728658515956	0.951788836620176	Gohir.A08G140000
GO:0006122	mitochondrial electron transport, ubiquinol to cytochrome c	biological_process	1	3079	14	36612	0.849348118591379	0.707728658515956	0.951788836620176	Gohir.A01G138200
GO:0009435	NAD biosynthetic process	biological_process	1	3079	14	36612	0.849348118591379	0.707728658515956	0.951788836620176	Gohir.D07G227300
GO:0009966	regulation of signal transduction	biological_process	1	3079	14	36612	0.849348118591379	0.707728658515956	0.951788836620176	Gohir.A09G040930
GO:0016117	carotenoid biosynthetic process	biological_process	1	3079	14	36612	0.849348118591379	0.707728658515956	0.951788836620176	Gohir.A01G135800
GO:0030176	integral component of endoplasmic reticulum membrane	cellular_component	1	3079	14	36612	0.849348118591379	0.707728658515956	0.951788836620176	Gohir.A04G063700
GO:0042555	MCM complex	cellular_component	1	3079	14	36612	0.849348118591379	0.707728658515956	0.951788836620176	Gohir.D11G114800
GO:0051301	cell division	biological_process	1	3079	14	36612	0.849348118591379	0.707728658515956	0.951788836620176	Gohir.A12G094400
GO:0042025	host cell nucleus	cellular_component	29	3079	375	36612	0.919560896394933	0.709002424677524	0.951788836620176	Gohir.A01G122700/Gohir.A01G127800/Gohir.A01G154600/Gohir.A03G076400/Gohir.A04G062201/Gohir.A05G281100/Gohir.A05G376800/Gohir.A06G062600/Gohir.A06G141900/Gohir.A07G147700/Gohir.A07G173200/Gohir.A08G096000/Gohir.A10G104100/Gohir.A11G205900/Gohir.A12G085300/Gohir.A13G079300/Gohir.A13G084300/Gohir.A13G105600/Gohir.D01G110500/Gohir.D01G125000/Gohir.D01G146800/Gohir.D03G070500/Gohir.D06G118100/Gohir.D0…
GO:0005794	Golgi apparatus	cellular_component	3	3079	43	36612	0.829595836763673	0.712726571252255	0.951788836620176	Gohir.A10G082400/Gohir.D03G061300/Gohir.D05G271700
GO:0009765	photosynthesis, light harvesting	biological_process	3	3079	43	36612	0.829595836763673	0.712726571252255	0.951788836620176	Gohir.A04G060200/Gohir.A06G164200/Gohir.A07G179000
GO:0015079	potassium ion transmembrane transporter activity	molecular_function	3	3079	43	36612	0.829595836763673	0.712726571252255	0.951788836620176	Gohir.A05G277700/Gohir.A11G252533/Gohir.D01G133100
GO:0019752	carboxylic acid metabolic process	biological_process	3	3079	43	36612	0.829595836763673	0.712726571252255	0.951788836620176	Gohir.A10G111200/Gohir.A12G096100/Gohir.A13G162914
GO:0005544	calcium-dependent phospholipid binding	molecular_function	2	3079	29	36612	0.820060252433056	0.713416056559253	0.951788836620176	Gohir.A05G308200/Gohir.D13G103300
GO:0006260	DNA replication	biological_process	7	3079	97	36612	0.858104284762425	0.716956322642146	0.951788836620176	Gohir.A01G051100/Gohir.A01G134350/Gohir.A03G070300/Gohir.A04G057126/Gohir.A13G000300/Gohir.A13G074000/Gohir.D04G090500
GO:0004298	threonine-type endopeptidase activity	molecular_function	4	3079	57	36612	0.834447274405566	0.71697463096735	0.951788836620176	Gohir.A01G114600/Gohir.A01G160500/Gohir.A06G143600/Gohir.A12G073000
GO:0005096	GTPase activator activity	molecular_function	4	3079	57	36612	0.834447274405566	0.71697463096735	0.951788836620176	Gohir.A10G183400/Gohir.A11G030600/Gohir.D03G110100/Gohir.D11G315300
GO:0005839	proteasome core complex	cellular_component	4	3079	57	36612	0.834447274405566	0.71697463096735	0.951788836620176	Gohir.A01G114600/Gohir.A01G160500/Gohir.A06G143600/Gohir.A12G073000
GO:0010411	xyloglucan metabolic process	biological_process	4	3079	57	36612	0.834447274405566	0.71697463096735	0.951788836620176	Gohir.A11G229300/Gohir.A12G079400/Gohir.D03G050800/Gohir.D08G095200
GO:0016762	xyloglucan:xyloglucosyl transferase activity	molecular_function	4	3079	57	36612	0.834447274405566	0.71697463096735	0.951788836620176	Gohir.A11G229300/Gohir.A12G079400/Gohir.D03G050800/Gohir.D08G095200
GO:0051603	proteolysis involved in cellular protein catabolic process	biological_process	4	3079	57	36612	0.834447274405566	0.71697463096735	0.951788836620176	Gohir.A01G114600/Gohir.A01G160500/Gohir.A06G143600/Gohir.A12G073000
GO:0004185	serine-type carboxypeptidase activity	molecular_function	6	3079	84	36612	0.849348118591379	0.719096951052931	0.951788836620176	Gohir.A04G008900/Gohir.A05G345300/Gohir.A13G060700/Gohir.A13G089390/Gohir.D04G085100/Gohir.D09G087300
GO:0036459	thiol-dependent ubiquitinyl hydrolase activity	molecular_function	5	3079	71	36612	0.837385469033754	0.722993902257917	0.951788836620176	Gohir.A06G032616/Gohir.A09G101100/Gohir.A10G195000/Gohir.D03G090700/Gohir.D13G187400
GO:0008234	cysteine-type peptidase activity	molecular_function	6	3079	85	36612	0.839355787784422	0.729681664291926	0.951788836620176	Gohir.A01G121900/Gohir.A03G063600/Gohir.A04G044032/Gohir.A05G377600/Gohir.A06G134002/Gohir.D06G137300
GO:0003746	translation elongation factor activity	molecular_function	4	3079	58	36612	0.820060252433056	0.72972407954636	0.951788836620176	Gohir.A05G345800/Gohir.A07G070000/Gohir.A10G207701/Gohir.A12G076800
GO:0009725	response to hormone	biological_process	4	3079	58	36612	0.820060252433056	0.72972407954636	0.951788836620176	Gohir.A06G078900/Gohir.A06G127202/Gohir.D06G078200/Gohir.D06G135400
GO:0003684	damaged DNA binding	molecular_function	2	3079	30	36612	0.792724910685287	0.730949395140165	0.951788836620176	Gohir.A05G245600/Gohir.A06G141900
GO:0005504	fatty acid binding	molecular_function	2	3079	30	36612	0.792724910685287	0.730949395140165	0.951788836620176	Gohir.A10G139400/Gohir.D04G065400
GO:0008094	DNA-dependent ATPase activity	molecular_function	2	3079	30	36612	0.792724910685287	0.730949395140165	0.951788836620176	Gohir.A07G141800/Gohir.A08G135700
GO:0009627	systemic acquired resistance	biological_process	2	3079	30	36612	0.792724910685287	0.730949395140165	0.951788836620176	Gohir.A10G139400/Gohir.D04G065400
GO:0019773	proteasome core complex, alpha-subunit complex	cellular_component	2	3079	30	36612	0.792724910685287	0.730949395140165	0.951788836620176	Gohir.A01G114600/Gohir.A06G143600
GO:0004372	glycine hydroxymethyltransferase activity	molecular_function	1	3079	15	36612	0.792724910685287	0.732317528411288	0.951788836620176	Gohir.A06G087701
GO:0005452	inorganic anion exchanger activity	molecular_function	1	3079	15	36612	0.792724910685287	0.732317528411288	0.951788836620176	Gohir.A03G096400
GO:0005819	spindle	cellular_component	1	3079	15	36612	0.792724910685287	0.732317528411288	0.951788836620176	Gohir.A12G087200
GO:0006207	'de novo' pyrimidine nucleobase biosynthetic process	biological_process	1	3079	15	36612	0.792724910685287	0.732317528411288	0.951788836620176	Gohir.A11G227533
GO:0006542	glutamine biosynthetic process	biological_process	1	3079	15	36612	0.792724910685287	0.732317528411288	0.951788836620176	Gohir.D01G129800
GO:0006820	anion transport	biological_process	1	3079	15	36612	0.792724910685287	0.732317528411288	0.951788836620176	Gohir.A03G096400
GO:0008295	spermidine biosynthetic process	biological_process	1	3079	15	36612	0.792724910685287	0.732317528411288	0.951788836620176	Gohir.A04G123600
GO:0008380	RNA splicing	biological_process	1	3079	15	36612	0.792724910685287	0.732317528411288	0.951788836620176	Gohir.A13G027700
GO:0009535	chloroplast thylakoid membrane	cellular_component	1	3079	15	36612	0.792724910685287	0.732317528411288	0.951788836620176	Gohir.A01G150154
GO:0016571	histone methylation	biological_process	1	3079	15	36612	0.792724910685287	0.732317528411288	0.951788836620176	Gohir.A05G334400
GO:0016780	phosphotransferase activity, for other substituted phosphate groups	molecular_function	1	3079	15	36612	0.792724910685287	0.732317528411288	0.951788836620176	Gohir.A13G092200
GO:0019264	glycine biosynthetic process from serine	biological_process	1	3079	15	36612	0.792724910685287	0.732317528411288	0.951788836620176	Gohir.A06G087701
GO:0032147	activation of protein kinase activity	biological_process	1	3079	15	36612	0.792724910685287	0.732317528411288	0.951788836620176	Gohir.A12G087200
GO:0035999	tetrahydrofolate interconversion	biological_process	1	3079	15	36612	0.792724910685287	0.732317528411288	0.951788836620176	Gohir.A06G087701
GO:0045901	positive regulation of translational elongation	biological_process	1	3079	15	36612	0.792724910685287	0.732317528411288	0.951788836620176	Gohir.A07G070000
GO:0045905	positive regulation of translational termination	biological_process	1	3079	15	36612	0.792724910685287	0.732317528411288	0.951788836620176	Gohir.A07G070000
GO:0060236	regulation of mitotic spindle organization	biological_process	1	3079	15	36612	0.792724910685287	0.732317528411288	0.951788836620176	Gohir.A12G087200
GO:0015629	actin cytoskeleton	cellular_component	3	3079	45	36612	0.792724910685287	0.741446043012028	0.959062172456903	Gohir.A01G166900/Gohir.A01G220300/Gohir.A07G148500
GO:0005216	ion channel activity	molecular_function	4	3079	59	36612	0.806160926120631	0.742037941360089	0.959062172456903	Gohir.A03G032100/Gohir.A05G345824/Gohir.A09G012000/Gohir.A11G015800
GO:0016616	oxidoreductase activity, acting on the CH-OH group of donors, NAD or NADP as acceptor	molecular_function	8	3079	113	36612	0.841831763559597	0.743459027962498	0.959062172456903	Gohir.A01G102000/Gohir.A05G322600/Gohir.A07G145000/Gohir.A09G031100/Gohir.A10G111200/Gohir.A12G096100/Gohir.D06G080100/Gohir.D13G057851
GO:0004568	chitinase activity	molecular_function	2	3079	31	36612	0.767153139372859	0.747561706145393	0.959062172456903	Gohir.D01G164000/Gohir.D06G050800
GO:0006032	chitin catabolic process	biological_process	2	3079	31	36612	0.767153139372859	0.747561706145393	0.959062172456903	Gohir.D01G164000/Gohir.D06G050800
GO:0015276	ligand-gated ion channel activity	molecular_function	2	3079	31	36612	0.767153139372859	0.747561706145393	0.959062172456903	Gohir.A05G345830/Gohir.D07G094500
GO:0016998	cell wall macromolecule catabolic process	biological_process	2	3079	31	36612	0.767153139372859	0.747561706145393	0.959062172456903	Gohir.D01G164000/Gohir.D06G050800
GO:0008233	peptidase activity	molecular_function	4	3079	60	36612	0.792724910685287	0.75392008337804	0.959062172456903	Gohir.A06G056700/Gohir.A11G091500/Gohir.A12G120500/Gohir.A13G099905
GO:0008235	metalloexopeptidase activity	molecular_function	1	3079	16	36612	0.743179603767457	0.754838345145492	0.959062172456903	Gohir.D11G161700
GO:0008878	glucose-1-phosphate adenylyltransferase activity	molecular_function	1	3079	16	36612	0.743179603767457	0.754838345145492	0.959062172456903	Gohir.A05G192300
GO:0019953	sexual reproduction	biological_process	1	3079	16	36612	0.743179603767457	0.754838345145492	0.959062172456903	Gohir.D08G183200
GO:0030976	thiamine pyrophosphate binding	molecular_function	1	3079	16	36612	0.743179603767457	0.754838345145492	0.959062172456903	Gohir.A09G166700
GO:0032977	membrane insertase activity	molecular_function	1	3079	16	36612	0.743179603767457	0.754838345145492	0.959062172456903	Gohir.A09G053832
GO:0050664	oxidoreductase activity, acting on NAD(P)H, oxygen as acceptor	molecular_function	1	3079	16	36612	0.743179603767457	0.754838345145492	0.959062172456903	Gohir.A12G195200
GO:0051513	regulation of monopolar cell growth	biological_process	1	3079	16	36612	0.743179603767457	0.754838345145492	0.959062172456903	Gohir.A05G372700
GO:0050661	NADP binding	molecular_function	8	3079	115	36612	0.827191211149865	0.760725864349169	0.959979372791623	Gohir.A03G085101/Gohir.A05G178000/Gohir.A05G341600/Gohir.A06G062700/Gohir.A07G153900/Gohir.A10G119700/Gohir.D06G061000/Gohir.D06G095000
GO:0005249	voltage-gated potassium channel activity	molecular_function	2	3079	32	36612	0.743179603767457	0.763283843234313	0.959979372791623	Gohir.A03G032100/Gohir.A05G345824
GO:0006367	transcription initiation from RNA polymerase II promoter	biological_process	2	3079	32	36612	0.743179603767457	0.763283843234313	0.959979372791623	Gohir.A05G258000/Gohir.A10G168600
GO:0006465	signal peptide processing	biological_process	2	3079	32	36612	0.743179603767457	0.763283843234313	0.959979372791623	Gohir.A06G056700/Gohir.A12G120500
GO:0010215	cellulose microfibril organization	biological_process	2	3079	32	36612	0.743179603767457	0.763283843234313	0.959979372791623	Gohir.A06G146100/Gohir.D08G061600
GO:0031225	anchored component of membrane	cellular_component	2	3079	32	36612	0.743179603767457	0.763283843234313	0.959979372791623	Gohir.A06G146100/Gohir.D08G061600
GO:0045893	positive regulation of transcription, DNA-templated	biological_process	4	3079	61	36612	0.779729420346184	0.765375384789582	0.959979372791623	Gohir.A03G078424/Gohir.A08G137400/Gohir.D01G096500/Gohir.D04G011900
GO:0006606	protein import into nucleus	biological_process	3	3079	47	36612	0.758991935762509	0.767831333664745	0.959979372791623	Gohir.A13G079300/Gohir.D09G180000/Gohir.D13G095900
GO:0006979	response to oxidative stress	biological_process	15	3079	208	36612	0.857514927423989	0.768726424904988	0.959979372791623	Gohir.1Z049361/Gohir.1Z049547/Gohir.A01G142201/Gohir.A01G142301/Gohir.A01G143600/Gohir.A04G075400/Gohir.A06G098220/Gohir.A06G111202/Gohir.A08G078800/Gohir.A09G061300/Gohir.D01G133700/Gohir.D03G071102/Gohir.D08G088600/Gohir.D09G060200/Gohir.D09G213600
GO:0006265	DNA topological change	biological_process	1	3079	17	36612	0.699463156487018	0.77546499109852	0.959979372791623	Gohir.A10G131800
GO:0006801	superoxide metabolic process	biological_process	1	3079	17	36612	0.699463156487018	0.77546499109852	0.959979372791623	Gohir.A10G178700
GO:0008970	phospholipase A1 activity	molecular_function	1	3079	17	36612	0.699463156487018	0.77546499109852	0.959979372791623	Gohir.D11G115500
GO:0019867	outer membrane	cellular_component	1	3079	17	36612	0.699463156487018	0.77546499109852	0.959979372791623	Gohir.A05G314316
GO:0043161	proteasome-mediated ubiquitin-dependent protein catabolic process	biological_process	1	3079	17	36612	0.699463156487018	0.77546499109852	0.959979372791623	Gohir.A06G141900
GO:0046907	intracellular transport	biological_process	1	3079	17	36612	0.699463156487018	0.77546499109852	0.959979372791623	Gohir.D08G218500
GO:0071669	plant-type cell wall organization or biogenesis	biological_process	1	3079	17	36612	0.699463156487018	0.77546499109852	0.959979372791623	Gohir.A13G084200
GO:0071805	potassium ion transmembrane transport	biological_process	4	3079	62	36612	0.767153139372859	0.776409630691255	0.959979372791623	Gohir.A05G277700/Gohir.A11G252533/Gohir.D01G133100/Gohir.D06G162500
GO:0006629	lipid metabolic process	biological_process	20	3079	274	36612	0.86794698250214	0.77703651605391	0.959979372791623	Gohir.A01G137617/Gohir.A01G137630/Gohir.A03G077412/Gohir.A03G093400/Gohir.A05G248533/Gohir.A06G118700/Gohir.A07G106700/Gohir.A07G168400/Gohir.A08G061900/Gohir.A09G035000/Gohir.A11G201350/Gohir.A11G232000/Gohir.A12G038500/Gohir.A12G097200/Gohir.D06G156000/Gohir.D08G070900/Gohir.D11G050250/Gohir.D11G115500/Gohir.D11G159350/Gohir.D11G243200
GO:0004535	poly(A)-specific ribonuclease activity	molecular_function	2	3079	33	36612	0.720659009713898	0.778147985709916	0.959979372791623	Gohir.A07G161910/Gohir.D13G187700
GO:0005741	mitochondrial outer membrane	cellular_component	2	3079	33	36612	0.720659009713898	0.778147985709916	0.959979372791623	Gohir.A10G107800/Gohir.A12G076500
GO:0004812	aminoacyl-tRNA ligase activity	molecular_function	7	3079	105	36612	0.792724910685287	0.78962738445503	0.966079318333052	Gohir.A10G142700/Gohir.A11G237100/Gohir.D01G037300/Gohir.D06G068800/Gohir.D09G127750/Gohir.D11G247600/Gohir.D13G190966
GO:0005730	nucleolus	cellular_component	2	3079	34	36612	0.699463156487018	0.792187197535845	0.966079318333052	Gohir.A06G107700/Gohir.D13G037150
GO:0005978	glycogen biosynthetic process	biological_process	2	3079	34	36612	0.699463156487018	0.792187197535845	0.966079318333052	Gohir.A04G065400/Gohir.A05G192300
GO:0016831	carboxy-lyase activity	molecular_function	2	3079	34	36612	0.699463156487018	0.792187197535845	0.966079318333052	Gohir.A09G166700/Gohir.A13G162914
GO:0003844	1,4-alpha-glucan branching enzyme activity	molecular_function	1	3079	18	36612	0.660604092237739	0.794356732932313	0.966079318333052	Gohir.A04G065400
GO:0019210	kinase inhibitor activity	molecular_function	1	3079	18	36612	0.660604092237739	0.794356732932313	0.966079318333052	Gohir.D04G060700
GO:0042721	TIM22 mitochondrial import inner membrane insertion complex	cellular_component	1	3079	18	36612	0.660604092237739	0.794356732932313	0.966079318333052	Gohir.D01G178000
GO:0045039	protein insertion into mitochondrial inner membrane	biological_process	1	3079	18	36612	0.660604092237739	0.794356732932313	0.966079318333052	Gohir.D01G178000
GO:0070897	transcription preinitiation complex assembly	biological_process	1	3079	18	36612	0.660604092237739	0.794356732932313	0.966079318333052	Gohir.D11G163900
GO:0006364	rRNA processing	biological_process	4	3079	64	36612	0.743179603767457	0.79724202600954	0.966079318333052	Gohir.A10G114500/Gohir.A12G131050/Gohir.A13G131500/Gohir.A13G156800
GO:0006413	translational initiation	biological_process	4	3079	64	36612	0.743179603767457	0.79724202600954	0.966079318333052	Gohir.A01G095300/Gohir.A08G230500/Gohir.D01G062900/Gohir.D01G079500
GO:0008138	protein tyrosine/serine/threonine phosphatase activity	molecular_function	3	3079	50	36612	0.713452419616759	0.803242269441752	0.966079318333052	Gohir.A05G026900/Gohir.A05G393800/Gohir.D11G026900
GO:0006464	cellular protein modification process	biological_process	2	3079	35	36612	0.679478494873104	0.805435051108149	0.966079318333052	Gohir.A03G075600/Gohir.A10G205366
GO:0007264	small GTPase mediated signal transduction	biological_process	2	3079	35	36612	0.679478494873104	0.805435051108149	0.966079318333052	Gohir.A12G037300/Gohir.D06G134800
GO:0006457	protein folding	biological_process	11	3079	162	36612	0.807405001623904	0.810268497166871	0.966079318333052	Gohir.A05G286200/Gohir.A06G045800/Gohir.A06G078700/Gohir.A06G113200/Gohir.A08G053500/Gohir.D01G100600/Gohir.D06G046300/Gohir.D06G149200/Gohir.D07G050300/Gohir.D08G063000/Gohir.D11G115700
GO:0004356	glutamate-ammonia ligase activity	molecular_function	1	3079	19	36612	0.625835455804174	0.811659449752049	0.966079318333052	Gohir.D01G129800
GO:0004462	lactoylglutathione lyase activity	molecular_function	1	3079	19	36612	0.625835455804174	0.811659449752049	0.966079318333052	Gohir.A06G094000
GO:0004630	phospholipase D activity	molecular_function	1	3079	19	36612	0.625835455804174	0.811659449752049	0.966079318333052	Gohir.A10G167300
GO:0005267	potassium channel activity	molecular_function	1	3079	19	36612	0.625835455804174	0.811659449752049	0.966079318333052	Gohir.D06G162500
GO:0005742	mitochondrial outer membrane translocase complex	cellular_component	1	3079	19	36612	0.625835455804174	0.811659449752049	0.966079318333052	Gohir.A03G126500
GO:0016429	tRNA (adenine-N1-)-methyltransferase activity	molecular_function	1	3079	19	36612	0.625835455804174	0.811659449752049	0.966079318333052	Gohir.A06G000101
GO:0016573	histone acetylation	biological_process	1	3079	19	36612	0.625835455804174	0.811659449752049	0.966079318333052	Gohir.D06G118100
GO:0033180	proton-transporting V-type ATPase, V1 domain	cellular_component	1	3079	19	36612	0.625835455804174	0.811659449752049	0.966079318333052	Gohir.A01G109000
GO:0070652	HAUS complex	cellular_component	1	3079	19	36612	0.625835455804174	0.811659449752049	0.966079318333052	Gohir.A12G042000
GO:0006812	cation transport	biological_process	10	3079	149	36612	0.798045212099283	0.813141358194332	0.966079318333052	Gohir.A04G053242/Gohir.A06G115900/Gohir.A08G083400/Gohir.A11G015800/Gohir.A12G093800/Gohir.A12G099600/Gohir.D03G080700/Gohir.D04G088900/Gohir.D06G120700/Gohir.D08G200000
GO:0006414	translational elongation	biological_process	4	3079	66	36612	0.720659009713898	0.816477971936898	0.966079318333052	Gohir.A04G064900/Gohir.A05G345800/Gohir.A10G207701/Gohir.A12G076800
GO:0006006	glucose metabolic process	biological_process	2	3079	36	36612	0.660604092237739	0.817925308014632	0.966079318333052	Gohir.A05G178000/Gohir.A05G341600
GO:0006813	potassium ion transport	biological_process	2	3079	36	36612	0.660604092237739	0.817925308014632	0.966079318333052	Gohir.A03G032100/Gohir.A05G345824
GO:0016311	dephosphorylation	biological_process	3	3079	52	36612	0.686011941939191	0.82423621996351	0.966079318333052	Gohir.A05G026900/Gohir.A05G393800/Gohir.D11G026900
GO:0009058	biosynthetic process	biological_process	14	3079	205	36612	0.812059664604441	0.826730856887318	0.966079318333052	Gohir.A04G049100/Gohir.A05G192300/Gohir.A05G241400/Gohir.A05G318401/Gohir.A07G039700/Gohir.A07G184500/Gohir.A08G080300/Gohir.A08G137800/Gohir.A08G169100/Gohir.A10G121800/Gohir.A11G292081/Gohir.D01G044475/Gohir.D07G117900/Gohir.D13G104600
GO:0003713	transcription coactivator activity	molecular_function	1	3079	20	36612	0.594543683013966	0.827506758095542	0.966079318333052	Gohir.A09G067900
GO:0005689	U12-type spliceosomal complex	cellular_component	1	3079	20	36612	0.594543683013966	0.827506758095542	0.966079318333052	Gohir.A11G200232
GO:0009089	lysine biosynthetic process via diaminopimelate	biological_process	1	3079	20	36612	0.594543683013966	0.827506758095542	0.966079318333052	Gohir.D09G040700
GO:0015165	pyrimidine nucleotide-sugar transmembrane transporter activity	molecular_function	1	3079	20	36612	0.594543683013966	0.827506758095542	0.966079318333052	Gohir.A09G059050
GO:0016818	hydrolase activity, acting on acid anhydrides, in phosphorus-containing anhydrides	molecular_function	1	3079	20	36612	0.594543683013966	0.827506758095542	0.966079318333052	Gohir.A10G161000
GO:0030131	clathrin adaptor complex	cellular_component	1	3079	20	36612	0.594543683013966	0.827506758095542	0.966079318333052	Gohir.A12G144500
GO:0031515	tRNA (m1A) methyltransferase complex	cellular_component	1	3079	20	36612	0.594543683013966	0.827506758095542	0.966079318333052	Gohir.A06G000101
GO:0090481	pyrimidine nucleotide-sugar transmembrane transport	biological_process	1	3079	20	36612	0.594543683013966	0.827506758095542	0.966079318333052	Gohir.A09G059050
GO:0000155	phosphorelay sensor kinase activity	molecular_function	2	3079	37	36612	0.642749927582665	0.829691649862503	0.966079318333052	Gohir.A09G031388/Gohir.D07G172100
GO:0004497	monooxygenase activity	molecular_function	2	3079	37	36612	0.642749927582665	0.829691649862503	0.966079318333052	Gohir.A03G115300/Gohir.D08G019800
GO:0016772	transferase activity, transferring phosphorus-containing groups	molecular_function	2	3079	37	36612	0.642749927582665	0.829691649862503	0.966079318333052	Gohir.A10G105700/Gohir.D07G172100
GO:0003682	chromatin binding	molecular_function	4	3079	68	36612	0.699463156487018	0.834186781218355	0.967186332503912	Gohir.A01G090200/Gohir.A13G054100/Gohir.D07G092200/Gohir.D13G071600
GO:0045735	nutrient reservoir activity	molecular_function	7	3079	111	36612	0.74987491551311	0.834212854448083	0.967186332503912	Gohir.A04G068828/Gohir.A10G111000/Gohir.A12G195100/Gohir.D04G098266/Gohir.D11G251500/Gohir.D11G251800/Gohir.D11G253800
GO:0006289	nucleotide-excision repair	biological_process	2	3079	38	36612	0.625835455804174	0.840767453015187	0.967186332503912	Gohir.A06G141900/Gohir.A12G083500
GO:0016307	phosphatidylinositol phosphate kinase activity	molecular_function	2	3079	38	36612	0.625835455804174	0.840767453015187	0.967186332503912	Gohir.D03G067500/Gohir.D04G108600
GO:0046488	phosphatidylinositol metabolic process	biological_process	2	3079	38	36612	0.625835455804174	0.840767453015187	0.967186332503912	Gohir.D03G067500/Gohir.D04G108600
GO:0000160	phosphorelay signal transduction system	biological_process	9	3079	140	36612	0.764413306732242	0.841657463032558	0.967186332503912	Gohir.A03G112450/Gohir.A04G099100/Gohir.A05G343600/Gohir.A08G105701/Gohir.A09G031388/Gohir.D06G090900/Gohir.D07G172100/Gohir.D13G004300/Gohir.D13G087700
GO:0000062	fatty-acyl-CoA binding	molecular_function	1	3079	21	36612	0.56623207906092	0.84202104241517	0.967186332503912	Gohir.A11G217000
GO:0003872	6-phosphofructokinase activity	molecular_function	1	3079	21	36612	0.56623207906092	0.84202104241517	0.967186332503912	Gohir.A06G151500
GO:0006002	fructose 6-phosphate metabolic process	biological_process	1	3079	21	36612	0.56623207906092	0.84202104241517	0.967186332503912	Gohir.A06G151500
GO:0051225	spindle assembly	biological_process	1	3079	21	36612	0.56623207906092	0.84202104241517	0.967186332503912	Gohir.A12G042000
GO:0005743	mitochondrial inner membrane	cellular_component	3	3079	54	36612	0.66060409223774	0.843283714179239	0.967329496696832	Gohir.A01G138200/Gohir.A03G071250/Gohir.D03G097800
GO:0016310	phosphorylation	biological_process	2	3079	39	36612	0.609788392834837	0.851185601760498	0.968065564768173	Gohir.A10G105700/Gohir.D07G172100
GO:0003747	translation release factor activity	molecular_function	1	3079	22	36612	0.540494257285423	0.855314398989292	0.968065564768173	Gohir.A08G117100
GO:0006298	mismatch repair	biological_process	1	3079	22	36612	0.540494257285423	0.855314398989292	0.968065564768173	Gohir.A09G046500
GO:0006415	translational termination	biological_process	1	3079	22	36612	0.540494257285423	0.855314398989292	0.968065564768173	Gohir.A08G117100
GO:0008061	chitin binding	molecular_function	1	3079	22	36612	0.540494257285423	0.855314398989292	0.968065564768173	Gohir.D01G164000
GO:0022625	cytosolic large ribosomal subunit	cellular_component	1	3079	22	36612	0.540494257285423	0.855314398989292	0.968065564768173	Gohir.A03G092800
GO:0030983	mismatched DNA binding	molecular_function	1	3079	22	36612	0.540494257285423	0.855314398989292	0.968065564768173	Gohir.A09G046500
GO:0042026	protein refolding	biological_process	1	3079	22	36612	0.540494257285423	0.855314398989292	0.968065564768173	Gohir.D13G099600
GO:0042578	phosphoric ester hydrolase activity	molecular_function	1	3079	22	36612	0.540494257285423	0.855314398989292	0.968065564768173	Gohir.A06G079700
GO:0043666	regulation of phosphoprotein phosphatase activity	biological_process	1	3079	22	36612	0.540494257285423	0.855314398989292	0.968065564768173	Gohir.A09G040930
GO:0006811	ion transport	biological_process	3	3079	56	36612	0.637011088943535	0.860513910799375	0.971887894802521	Gohir.A03G032100/Gohir.A05G345824/Gohir.A09G012000
GO:0016765	transferase activity, transferring alkyl or aryl (other than methyl) groups	molecular_function	2	3079	40	36612	0.594543683013966	0.860978335042704	0.971887894802521	Gohir.A09G164800/Gohir.A11G130233
GO:0005509	calcium ion binding	molecular_function	36	3079	503	36612	0.851036683439474	0.865637988860583	0.974063507864852	Gohir.A01G095000/Gohir.A01G198700/Gohir.A03G076800/Gohir.A03G089401/Gohir.A03G093300/Gohir.A04G057000/Gohir.A04G059852/Gohir.A05G166800/Gohir.A05G202200/Gohir.A05G308200/Gohir.A07G171500/Gohir.A07G187765/Gohir.A08G091200/Gohir.A09G119400/Gohir.A10G102431/Gohir.A10G161800/Gohir.A10G173200/Gohir.A10G196600/Gohir.A11G102500/Gohir.A11G175200/Gohir.A11G222400/Gohir.A12G195200/Gohir.A12G268900/Gohir.A1…
GO:0015211	purine nucleoside transmembrane transporter activity	molecular_function	1	3079	23	36612	0.516994506968666	0.867489500533757	0.974063507864852	Gohir.A12G099400
GO:0051726	regulation of cell cycle	biological_process	1	3079	23	36612	0.516994506968666	0.867489500533757	0.974063507864852	Gohir.D06G127200
GO:0098656	anion transmembrane transport	biological_process	1	3079	23	36612	0.516994506968666	0.867489500533757	0.974063507864852	Gohir.A12G076500
GO:0003755	peptidyl-prolyl cis-trans isomerase activity	molecular_function	7	3079	117	36612	0.711419791640643	0.870950113607836	0.976659098372903	Gohir.A01G164200/Gohir.A03G099700/Gohir.A04G122701/Gohir.A07G038100/Gohir.A09G208100/Gohir.A13G103900/Gohir.D09G045400
GO:0004386	helicase activity	molecular_function	3	3079	58	36612	0.615045189324792	0.876057273544749	0.980118166357699	Gohir.A01G156200/Gohir.A04G054700/Gohir.A12G123300
GO:0006396	RNA processing	biological_process	7	3079	118	36612	0.705390810355552	0.876367643413067	0.980118166357699	Gohir.A01G133600/Gohir.A03G070700/Gohir.A10G117532/Gohir.A11G146900/Gohir.A11G154100/Gohir.A11G207400/Gohir.A12G212800
GO:0004864	protein phosphatase inhibitor activity	molecular_function	1	3079	24	36612	0.495453069178305	0.878640388173664	0.980118166357699	Gohir.A09G040930
GO:0050660	flavin adenine dinucleotide binding	molecular_function	15	3079	230	36612	0.775491760452999	0.878647109134784	0.980118166357699	Gohir.A06G062700/Gohir.A06G081700/Gohir.A06G122200/Gohir.A07G150400/Gohir.A07G153900/Gohir.A10G109550/Gohir.A10G119700/Gohir.A10G130300/Gohir.A12G115850/Gohir.D06G061000/Gohir.D06G071500/Gohir.D06G095000/Gohir.D06G122600/Gohir.D07G156800/Gohir.D13G107450
GO:0003712	transcription coregulator activity	molecular_function	4	3079	75	36612	0.63417992854823	0.88526305894753	0.986203931986108	Gohir.A01G150200/Gohir.A07G161500/Gohir.D01G110850/Gohir.D06G118100
GO:0004402	histone acetyltransferase activity	molecular_function	1	3079	25	36612	0.475634946411172	0.888853196876334	0.987614663195927	Gohir.D06G118100
GO:0008654	phospholipid biosynthetic process	biological_process	1	3079	25	36612	0.475634946411172	0.888853196876334	0.987614663195927	Gohir.A13G092200
GO:0004222	metalloendopeptidase activity	molecular_function	5	3079	92	36612	0.646243133710832	0.895025108069079	0.98791085457388	Gohir.A04G063700/Gohir.A11G091500/Gohir.A12G082400/Gohir.A13G109700/Gohir.D11G214900
GO:0004843	thiol-dependent ubiquitin-specific protease activity	molecular_function	1	3079	26	36612	0.457341294626127	0.898206819934189	0.98791085457388	Gohir.D03G073200
GO:0006284	base-excision repair	biological_process	1	3079	26	36612	0.457341294626127	0.898206819934189	0.98791085457388	Gohir.A04G057300
GO:0003743	translation initiation factor activity	molecular_function	7	3079	123	36612	0.676716387170367	0.900690222269399	0.98791085457388	Gohir.A01G095300/Gohir.A01G163000/Gohir.A06G128300/Gohir.A08G230500/Gohir.A11G309600/Gohir.D01G062900/Gohir.D01G079500
GO:0048364	root development	biological_process	2	3079	45	36612	0.528483273790192	0.901630347147405	0.98791085457388	Gohir.A08G148500/Gohir.A09G194400
GO:0004674	protein serine/threonine kinase activity	molecular_function	12	3079	195	36612	0.731746071401804	0.902323952964747	0.98791085457388	Gohir.A01G037900/Gohir.A01G070500/Gohir.A03G162100/Gohir.A05G053800/Gohir.A05G387700/Gohir.A05G395400/Gohir.A06G122100/Gohir.A08G191300/Gohir.A12G035900/Gohir.D03G113550/Gohir.D06G019500/Gohir.D11G265300
GO:0005852	eukaryotic translation initiation factor 3 complex	cellular_component	3	3079	62	36612	0.575364854529644	0.902597204563483	0.98791085457388	Gohir.A06G128300/Gohir.A11G270732/Gohir.A11G309600
GO:0016779	nucleotidyltransferase activity	molecular_function	3	3079	62	36612	0.575364854529644	0.902597204563483	0.98791085457388	Gohir.A05G192300/Gohir.A09G176100/Gohir.D13G104600
GO:0004470	malic enzyme activity	molecular_function	1	3079	27	36612	0.440402728158493	0.906773517616982	0.98791085457388	Gohir.D06G129950
GO:0006270	DNA replication initiation	biological_process	1	3079	27	36612	0.440402728158493	0.906773517616982	0.98791085457388	Gohir.D11G114800
GO:0010088	phloem development	biological_process	1	3079	27	36612	0.440402728158493	0.906773517616982	0.98791085457388	Gohir.A11G035066
GO:0033926	glycopeptide alpha-N-acetylgalactosaminidase activity	molecular_function	1	3079	27	36612	0.440402728158493	0.906773517616982	0.98791085457388	Gohir.A01G111200
GO:0030247	polysaccharide binding	molecular_function	7	3079	125	36612	0.665888924975641	0.90921239044762	0.98791085457388	Gohir.A03G162100/Gohir.A09G017300/Gohir.A10G182700/Gohir.D01G034500/Gohir.D09G016600/Gohir.D11G171000/Gohir.D13G142400
GO:0006468	protein phosphorylation	biological_process	190	3079	2466	36612	0.916166259307814	0.911737640905064	0.98791085457388	Gohir.1Z047500/Gohir.1Z049573/Gohir.1Z049617/Gohir.A01G001900/Gohir.A01G037900/Gohir.A01G070500/Gohir.A01G099800/Gohir.A01G104700/Gohir.A01G121300/Gohir.A01G136850/Gohir.A01G142700/Gohir.A01G145600/Gohir.A01G151472/Gohir.A01G171300/Gohir.A03G017604/Gohir.A03G067900/Gohir.A03G079800/Gohir.A03G088300/Gohir.A03G090300/Gohir.A03G096700/Gohir.A03G098700/Gohir.A03G128001/Gohir.A03G162100/Gohir.A04G0485…
GO:0009664	plant-type cell wall organization	biological_process	3	3079	64	36612	0.557384702825593	0.913841179554578	0.98791085457388	Gohir.A07G098800/Gohir.A11G239500/Gohir.D09G013100
GO:0003774	motor activity	molecular_function	2	3079	47	36612	0.505994623841673	0.914541766572689	0.98791085457388	Gohir.A09G055100/Gohir.A10G119200
GO:0006334	nucleosome assembly	biological_process	2	3079	47	36612	0.505994623841673	0.914541766572689	0.98791085457388	Gohir.A03G066100/Gohir.A07G173200
GO:0016459	myosin complex	cellular_component	2	3079	47	36612	0.505994623841673	0.914541766572689	0.98791085457388	Gohir.A09G055100/Gohir.A10G119200
GO:0004471	malate dehydrogenase (decarboxylating) (NAD+) activity	molecular_function	1	3079	28	36612	0.42467405929569	0.914619474682919	0.98791085457388	Gohir.D06G129950
GO:0005681	spliceosomal complex	cellular_component	1	3079	28	36612	0.42467405929569	0.914619474682919	0.98791085457388	Gohir.D13G134400
GO:0004672	protein kinase activity	molecular_function	190	3079	2473	36612	0.913572986434723	0.918495705513993	0.98791085457388	Gohir.1Z047500/Gohir.1Z049573/Gohir.1Z049617/Gohir.A01G001900/Gohir.A01G037900/Gohir.A01G070500/Gohir.A01G099800/Gohir.A01G104700/Gohir.A01G121300/Gohir.A01G136850/Gohir.A01G142700/Gohir.A01G145600/Gohir.A01G151472/Gohir.A01G171300/Gohir.A03G017604/Gohir.A03G067900/Gohir.A03G079800/Gohir.A03G088300/Gohir.A03G090300/Gohir.A03G096700/Gohir.A03G098700/Gohir.A03G128001/Gohir.A03G162100/Gohir.A04G0485…
GO:0000159	protein phosphatase type 2A complex	cellular_component	3	3079	65	36612	0.548809553551353	0.91900823366388	0.98791085457388	Gohir.A01G142300/Gohir.A09G043566/Gohir.D06G156850
GO:0003951	NAD+ kinase activity	molecular_function	1	3079	29	36612	0.410030126216528	0.921805311044478	0.98791085457388	Gohir.D13G058925
GO:0006012	galactose metabolic process	biological_process	1	3079	29	36612	0.410030126216528	0.921805311044478	0.98791085457388	Gohir.A05G001766
GO:0016538	cyclin-dependent protein serine/threonine kinase regulator activity	molecular_function	1	3079	29	36612	0.410030126216528	0.921805311044478	0.98791085457388	Gohir.A01G127800
GO:0006511	ubiquitin-dependent protein catabolic process	biological_process	7	3079	129	36612	0.645241206371746	0.924385659446406	0.98791085457388	Gohir.A01G114600/Gohir.A05G281100/Gohir.A06G143600/Gohir.A09G062400/Gohir.D01G125000/Gohir.D03G073200/Gohir.D08G107200
GO:0005576	extracellular region	cellular_component	6	3079	114	36612	0.625835455804174	0.924941110892437	0.98791085457388	Gohir.A03G107800/Gohir.A04G066114/Gohir.A07G098800/Gohir.A11G239500/Gohir.D08G183200/Gohir.D09G013100
GO:0006508	proteolysis	biological_process	49	3079	700	36612	0.832361156219552	0.926060306019053	0.98791085457388	Gohir.1Z050580/Gohir.A01G121900/Gohir.A03G062000/Gohir.A03G063600/Gohir.A04G008900/Gohir.A04G044032/Gohir.A04G050250/Gohir.A05G285000/Gohir.A05G345300/Gohir.A05G377600/Gohir.A06G122500/Gohir.A06G134002/Gohir.A07G106400/Gohir.A08G039100/Gohir.A08G099300/Gohir.A08G246101/Gohir.A09G043300/Gohir.A09G045346/Gohir.A09G094700/Gohir.A09G135400/Gohir.A10G147200/Gohir.A10G185800/Gohir.A11G091500/Gohir.A11G…
GO:0008374	O-acyltransferase activity	molecular_function	1	3079	30	36612	0.396362455342644	0.928386549523937	0.98791085457388	Gohir.A07G106700
GO:0008641	ubiquitin-like modifier activating enzyme activity	molecular_function	1	3079	30	36612	0.396362455342644	0.928386549523937	0.98791085457388	Gohir.D13G118500
GO:0032502	developmental process	biological_process	1	3079	30	36612	0.396362455342644	0.928386549523937	0.98791085457388	Gohir.A04G053800
GO:0019888	protein phosphatase regulator activity	molecular_function	3	3079	67	36612	0.532427178818477	0.928501812598584	0.98791085457388	Gohir.A01G142300/Gohir.A09G043566/Gohir.D06G156850
GO:0061630	ubiquitin protein ligase activity	molecular_function	3	3079	67	36612	0.532427178818477	0.928501812598584	0.98791085457388	Gohir.A09G227600/Gohir.A13G093100/Gohir.D13G098600
GO:0022857	transmembrane transporter activity	molecular_function	40	3079	584	36612	0.814443401388994	0.929202149111448	0.98791085457388	Gohir.A03G071250/Gohir.A03G079000/Gohir.A03G100400/Gohir.A03G157600/Gohir.A04G079700/Gohir.A04G099600/Gohir.A06G063000/Gohir.A06G103000/Gohir.A06G123202/Gohir.A07G053800/Gohir.A07G063200/Gohir.A07G177600/Gohir.A08G082200/Gohir.A08G082400/Gohir.A08G170000/Gohir.A09G024300/Gohir.A09G058400/Gohir.A10G042580/Gohir.A10G131900/Gohir.A10G158200/Gohir.A10G197600/Gohir.A11G129600/Gohir.A11G186600/Gohir.A1…
GO:0006869	lipid transport	biological_process	4	3079	84	36612	0.56623207906092	0.930397147447719	0.98791085457388	Gohir.A10G147900/Gohir.A10G150100/Gohir.D07G080100/Gohir.D08G037101
GO:0048544	recognition of pollen	biological_process	6	3079	116	36612	0.615045189324792	0.931989369984303	0.98791085457388	Gohir.A01G037900/Gohir.A01G070500/Gohir.A03G162100/Gohir.A05G387700/Gohir.A06G122100/Gohir.D06G019500
GO:0003950	NAD+ ADP-ribosyltransferase activity	molecular_function	1	3079	31	36612	0.383576569686429	0.934414044303222	0.98791085457388	Gohir.D03G073728
GO:0030488	tRNA methylation	biological_process	1	3079	31	36612	0.383576569686429	0.934414044303222	0.98791085457388	Gohir.A06G000101
GO:0005516	calmodulin binding	molecular_function	2	3079	51	36612	0.466308770991345	0.935730539502681	0.98791085457388	Gohir.A01G160200/Gohir.A05G370400
GO:0030014	CCR4-NOT complex	cellular_component	2	3079	51	36612	0.466308770991345	0.935730539502681	0.98791085457388	Gohir.A07G161910/Gohir.D13G187700
GO:0005347	ATP transmembrane transporter activity	molecular_function	5	3079	102	36612	0.582885963739182	0.937492342692512	0.98791085457388	Gohir.A03G071250/Gohir.A05G009000/Gohir.A06G084900/Gohir.A12G083322/Gohir.D03G097800
GO:0008308	voltage-gated anion channel activity	molecular_function	1	3079	32	36612	0.371589801883728	0.939934373369961	0.98791085457388	Gohir.A12G076500
GO:0016874	ligase activity	molecular_function	1	3079	32	36612	0.371589801883728	0.939934373369961	0.98791085457388	Gohir.A11G224810
GO:0000166	nucleotide binding	molecular_function	15	3079	251	36612	0.710609979697967	0.940258683941493	0.98791085457388	Gohir.A05G358900/Gohir.A07G094800/Gohir.A08G083400/Gohir.A10G084400/Gohir.A10G142700/Gohir.A11G237100/Gohir.D01G037300/Gohir.D04G189200/Gohir.D06G068800/Gohir.D06G151800/Gohir.D08G200000/Gohir.D09G127750/Gohir.D11G103400/Gohir.D11G247600/Gohir.D13G190966
GO:0003729	mRNA binding	molecular_function	1	3079	33	36612	0.360329504856949	0.944990197984338	0.988704162487117	Gohir.A03G080800
GO:0005886	plasma membrane	cellular_component	1	3079	33	36612	0.360329504856949	0.944990197984338	0.988704162487117	Gohir.D04G060700
GO:0030599	pectinesterase activity	molecular_function	7	3079	136	36612	0.612030261926141	0.945666451884737	0.988704162487117	Gohir.1Z049342/Gohir.A01G034700/Gohir.A01G145300/Gohir.A06G143700/Gohir.A11G014800/Gohir.A11G228600/Gohir.A13G112500
GO:0042545	cell wall modification	biological_process	7	3079	136	36612	0.612030261926141	0.945666451884737	0.988704162487117	Gohir.1Z049342/Gohir.A01G034700/Gohir.A01G145300/Gohir.A06G143700/Gohir.A11G014800/Gohir.A11G228600/Gohir.A13G112500
GO:0006807	nitrogen compound metabolic process	biological_process	2	3079	54	36612	0.440402728158493	0.9482421742561	0.990179174591751	Gohir.A01G193200/Gohir.D01G129800
GO:0005975	carbohydrate metabolic process	biological_process	58	3079	836	36612	0.824964919014593	0.949938410414916	0.990733311475679	Gohir.1Z049351/Gohir.A01G125900/Gohir.A01G145500/Gohir.A01G158400/Gohir.A01G218750/Gohir.A03G049125/Gohir.A03G056250/Gohir.A03G086800/Gohir.A04G015500/Gohir.A04G015800/Gohir.A04G065400/Gohir.A05G202200/Gohir.A05G408400/Gohir.A06G072500/Gohir.A06G103200/Gohir.A06G116500/Gohir.A06G129900/Gohir.A06G146900/Gohir.A07G082700/Gohir.A07G086700/Gohir.A07G149400/Gohir.A07G167900/Gohir.A08G080000/Gohir.A08G…
GO:0045454	cell redox homeostasis	biological_process	1	3079	35	36612	0.339739247436552	0.95386134313818	0.992767619720223	Gohir.A12G275300
GO:0005783	endoplasmic reticulum	cellular_component	3	3079	74	36612	0.482062445686999	0.954224876836967	0.992767619720223	Gohir.A01G148518/Gohir.D01G146600/Gohir.D07G050300
GO:0004553	hydrolase activity, hydrolyzing O-glycosyl compounds	molecular_function	27	3079	428	36612	0.750125207540985	0.956583378001915	0.994004732642576	Gohir.1Z049351/Gohir.A01G158400/Gohir.A01G218750/Gohir.A03G049125/Gohir.A03G086800/Gohir.A04G065400/Gohir.A05G408400/Gohir.A06G072500/Gohir.A06G103200/Gohir.A06G116500/Gohir.A06G129900/Gohir.A06G146900/Gohir.A08G080000/Gohir.A08G082500/Gohir.A08G094424/Gohir.A09G120200/Gohir.A10G122500/Gohir.A10G126700/Gohir.A11G209100/Gohir.A11G229300/Gohir.A12G077500/Gohir.A12G079400/Gohir.D03G050800/Gohir.D06G…
GO:0008299	isoprenoid biosynthetic process	biological_process	2	3079	57	36612	0.417223637202783	0.958408130324384	0.994684872742034	Gohir.D01G206500/Gohir.D13G057851
GO:0055085	transmembrane transport	biological_process	91	3079	1279	36612	0.846027758471788	0.962429434709092	0.997506916121077	Gohir.A01G113300/Gohir.A01G131111/Gohir.A01G151436/Gohir.A01G152000/Gohir.A01G163100/Gohir.A03G032100/Gohir.A03G038500/Gohir.A03G071250/Gohir.A03G079000/Gohir.A03G100400/Gohir.A03G108900/Gohir.A03G121600/Gohir.A03G135900/Gohir.A03G157600/Gohir.A04G053242/Gohir.A04G099600/Gohir.A05G009000/Gohir.A05G169800/Gohir.A05G317500/Gohir.A05G345824/Gohir.A06G063000/Gohir.A06G075500/Gohir.A06G084900/Gohir.A0…
GO:0015267	channel activity	molecular_function	4	3079	95	36612	0.500668364643339	0.963474327218123	0.997506916121077	Gohir.A01G163100/Gohir.A03G038500/Gohir.A03G121600/Gohir.D09G159600
GO:0003824	catalytic activity	molecular_function	121	3079	1670	36612	0.861554319098082	0.966190867062858	0.998526912642162	Gohir.A01G111200/Gohir.A01G115800/Gohir.A01G122800/Gohir.A01G125900/Gohir.A01G126900/Gohir.A01G131500/Gohir.A01G193200/Gohir.A03G028500/Gohir.A03G050900/Gohir.A03G056250/Gohir.A03G158400/Gohir.A04G057300/Gohir.A04G062600/Gohir.A04G065400/Gohir.A04G065600/Gohir.A04G065642/Gohir.A04G073300/Gohir.A04G091000/Gohir.A04G123600/Gohir.A05G202200/Gohir.A05G241400/Gohir.A05G275900/Gohir.A05G318401/Gohir.A0…
GO:0032875	regulation of DNA endoreduplication	biological_process	1	3079	39	36612	0.304894196417418	0.967543507650726	0.998526912642162	Gohir.A11G311600
GO:0008194	UDP-glycosyltransferase activity	molecular_function	12	3079	225	36612	0.63417992854823	0.969962704180116	0.998526912642162	Gohir.A01G142101/Gohir.A05G319100/Gohir.A05G372000/Gohir.A07G184000/Gohir.A10G146700/Gohir.A12G065700/Gohir.A12G204200/Gohir.D03G039000/Gohir.D03G137400/Gohir.D04G107700/Gohir.D07G201700/Gohir.D13G041100
GO:0015299	solute:proton antiporter activity	molecular_function	3	3079	81	36612	0.440402728158493	0.971077628412005	0.998526912642162	Gohir.A12G093800/Gohir.A12G099600/Gohir.D03G080700
GO:0016192	vesicle-mediated transport	biological_process	15	3079	273	36612	0.653344706608753	0.973914730877196	0.998526912642162	Gohir.A04G063670/Gohir.A05G301800/Gohir.A05G345101/Gohir.A08G154700/Gohir.A09G003200/Gohir.A09G199800/Gohir.A10G155700/Gohir.A10G196100/Gohir.A12G070200/Gohir.A12G144500/Gohir.A13G122100/Gohir.D01G122400/Gohir.D04G068000/Gohir.D07G162400/Gohir.D13G105401
GO:0031625	ubiquitin protein ligase binding	molecular_function	1	3079	42	36612	0.28311603953046	0.975070268687408	0.998526912642162	Gohir.A09G062400
GO:0006139	nucleobase-containing compound metabolic process	biological_process	2	3079	64	36612	0.371589801883728	0.975214430638996	0.998526912642162	Gohir.D04G189200/Gohir.D13G108500
GO:0006520	cellular amino acid metabolic process	biological_process	2	3079	65	36612	0.365873035700902	0.976998754352492	0.998526912642162	Gohir.A12G212900/Gohir.A13G162914
GO:0006470	protein dephosphorylation	biological_process	11	3079	216	36612	0.605553751217928	0.977001935929871	0.998526912642162	Gohir.A03G158400/Gohir.A05G026900/Gohir.A05G082800/Gohir.A06G132502/Gohir.A08G082062/Gohir.A09G239400/Gohir.A10G167400/Gohir.A11G172000/Gohir.D04G168300/Gohir.D08G107800/Gohir.D11G026900
GO:0008483	transaminase activity	molecular_function	1	3079	43	36612	0.276531945587891	0.977169219814328	0.998526912642162	Gohir.A10G148200
GO:0003779	actin binding	molecular_function	4	3079	105	36612	0.452985663248736	0.980216282033675	0.998526912642162	Gohir.A01G166900/Gohir.A01G220300/Gohir.A07G148500/Gohir.A08G099784
GO:0008168	methyltransferase activity	molecular_function	14	3079	266	36612	0.625835455804174	0.981063572597825	0.998526912642162	Gohir.A05G255600/Gohir.A08G076400/Gohir.A09G027200/Gohir.A10G063300/Gohir.A10G096300/Gohir.A10G117300/Gohir.A11G157100/Gohir.A12G063000/Gohir.A13G074200/Gohir.A13G117400/Gohir.A13G131500/Gohir.D08G118300/Gohir.D08G226200/Gohir.D13G081400
GO:0004722	protein serine/threonine phosphatase activity	molecular_function	8	3079	180	36612	0.528483273790192	0.986720911171107	0.998526912642162	Gohir.A03G158400/Gohir.A06G132502/Gohir.A08G082062/Gohir.A09G239400/Gohir.A10G167400/Gohir.A11G172000/Gohir.D04G168300/Gohir.D08G107800
GO:0016620	oxidoreductase activity, acting on the aldehyde or oxo group of donors, NAD or NADP as acceptor	molecular_function	2	3079	73	36612	0.325777360555598	0.987423151332715	0.998526912642162	Gohir.A05G178000/Gohir.A06G045700
GO:0030117	membrane coat	cellular_component	1	3079	50	36612	0.237817473205586	0.987665763759223	0.998526912642162	Gohir.A05G301800
GO:0008270	zinc ion binding	molecular_function	65	3079	992	36612	0.77913990717556	0.988103458262693	0.998526912642162	Gohir.A01G128300/Gohir.A01G145614/Gohir.A01G165700/Gohir.A03G060600/Gohir.A03G062000/Gohir.A03G073100/Gohir.A03G101100/Gohir.A04G070700/Gohir.A05G281100/Gohir.A05G334400/Gohir.A06G045200/Gohir.A06G118400/Gohir.A06G141133/Gohir.A07G164360/Gohir.A07G169850/Gohir.A07G175600/Gohir.A08G072900/Gohir.A08G124200/Gohir.A08G137400/Gohir.A08G204300/Gohir.A09G002800/Gohir.A09G040300/Gohir.A09G047500/Gohir.A0…
GO:0007165	signal transduction	biological_process	21	3079	382	36612	0.653686771900172	0.988292765910364	0.998526912642162	Gohir.A01G128700/Gohir.A01G142300/Gohir.A08G086600/Gohir.A08G123400/Gohir.A09G009200/Gohir.A09G031388/Gohir.A09G043566/Gohir.A10G118780/Gohir.A11G099800/Gohir.A11G297925/Gohir.D07G139000/Gohir.D07G172100/Gohir.D08G079800/Gohir.D08G144800/Gohir.D11G295300/Gohir.D11G296800/Gohir.D11G310840/Gohir.D11G311680/Gohir.D11G312284/Gohir.D11G316350/Gohir.D11G317100
GO:0004857	enzyme inhibitor activity	molecular_function	10	3079	217	36612	0.547966528123471	0.989478222773912	0.998526912642162	Gohir.A01G145300/Gohir.A01G145318/Gohir.A03G119300/Gohir.A05G244700/Gohir.A06G143700/Gohir.A11G014800/Gohir.A11G228600/Gohir.D08G191550/Gohir.D11G230300/Gohir.D11G294100
GO:0046982	protein heterodimerization activity	molecular_function	11	3079	233	36612	0.561371717867264	0.989510715626323	0.998526912642162	Gohir.A04G081700/Gohir.A08G180300/Gohir.A10G168600/Gohir.A12G055300/Gohir.A12G190000/Gohir.A13G097800/Gohir.A13G134000/Gohir.D01G208900/Gohir.D08G041700/Gohir.D08G096650/Gohir.D13G136500
GO:0006886	intracellular protein transport	biological_process	16	3079	312	36612	0.609788392834837	0.99023187902501	0.998526912642162	Gohir.A01G148518/Gohir.A05G113200/Gohir.A05G301800/Gohir.A06G045200/Gohir.A07G137000/Gohir.A08G102000/Gohir.A08G137366/Gohir.A10G107800/Gohir.A10G114113/Gohir.A10G136400/Gohir.A12G070200/Gohir.A12G093750/Gohir.A12G144500/Gohir.D07G146700/Gohir.D09G180000/Gohir.D13G114900
GO:0005198	structural molecule activity	molecular_function	1	3079	53	36612	0.224356106797723	0.990526897402845	0.998526912642162	Gohir.A12G070200
GO:0005737	cytoplasm	cellular_component	19	3079	362	36612	0.624106628578196	0.991963820217072	0.998526912642162	Gohir.A01G141700/Gohir.A04G073300/Gohir.A04G091000/Gohir.A06G128300/Gohir.A06G194800/Gohir.A08G080300/Gohir.A09G045200/Gohir.A09G148900/Gohir.A10G142700/Gohir.A11G226900/Gohir.A11G309600/Gohir.A13G079300/Gohir.A13G134101/Gohir.D01G130500/Gohir.D06G151800/Gohir.D07G195600/Gohir.D08G133133/Gohir.D13G095900/Gohir.D13G122400
GO:0008236	serine-type peptidase activity	molecular_function	1	3079	55	36612	0.216197702914169	0.992055374477657	0.998526912642162	Gohir.D09G087000
GO:0000786	nucleosome	cellular_component	5	3079	139	36612	0.427729268355371	0.992653224920738	0.998526912642162	Gohir.A07G173200/Gohir.A13G097800/Gohir.A13G134000/Gohir.D01G208900/Gohir.D08G041700
GO:0006099	tricarboxylic acid cycle	biological_process	1	3079	58	36612	0.205015063108264	0.993898494290351	0.998597777951298	Gohir.A12G093625
GO:0030170	pyridoxal phosphate binding	molecular_function	6	3079	164	36612	0.43503196318095	0.995186110409067	0.998710972665533	Gohir.A06G087701/Gohir.A07G039700/Gohir.A10G148200/Gohir.A11G308100/Gohir.A12G240000/Gohir.A13G162914
GO:0035556	intracellular signal transduction	biological_process	1	3079	74	36612	0.160687481895666	0.998507629351748	0.999854529357284	Gohir.A03G110600
GO:0043531	ADP binding	molecular_function	24	3079	520	36612	0.548809553551353	0.9997476189441	0.999854529357284	Gohir.A03G114300/Gohir.A04G033000/Gohir.A04G037433/Gohir.A04G037500/Gohir.A04G042700/Gohir.A05G294500/Gohir.A05G295500/Gohir.A06G192100/Gohir.A08G088162/Gohir.A11G282900/Gohir.A11G297925/Gohir.A11G316600/Gohir.D09G004150/Gohir.D11G246760/Gohir.D11G295300/Gohir.D11G296800/Gohir.D11G310840/Gohir.D11G311680/Gohir.D11G312284/Gohir.D11G316350/Gohir.D11G317100/Gohir.D11G325101/Gohir.D11G330000/Gohir.D1…
GO:0005515	protein binding	molecular_function	423	3079	5848	36612	0.860095683703514	0.999854529357284	0.999854529357284	Gohir.1Z049573/Gohir.1Z049617/Gohir.A01G095100/Gohir.A01G099800/Gohir.A01G121300/Gohir.A01G122900/Gohir.A01G131900/Gohir.A01G133600/Gohir.A01G134100/Gohir.A01G134150/Gohir.A01G138600/Gohir.A01G145818/Gohir.A01G146436/Gohir.A01G147100/Gohir.A01G159300/Gohir.A01G160100/Gohir.A01G228166/Gohir.A03G034700/Gohir.A03G060100/Gohir.A03G072200/Gohir.A03G073100/Gohir.A03G077100/Gohir.A03G079700/Gohir.A03G09…
