# Supplementary material for: Zinc Finger Protein8 (GhZFP8) Regulates the Initiation of Trichomes in Arabidopsis and the Development of Fiber in Cotton
Source: Plants (Basel). 2024 Feb 8;13(4):492. doi: 10.3390/plants13040492 (PMC10892670; doi:10.3390/plants13040492)
Supplement: Supplementary file 1 [file plants-13-00492-s001.zip › Table S6 KEGG enrichment analysis of GhZFP8 target genes.xls]

ID	Description	ListHits	ListTotal	PopHits	PopTotal	EnrichmentScore	pvalue	p.adjust	Genes
ko00195	Photosynthesis	77	1868	227	23929	4.34522776368044	8.83392161105631e-30	2.74734962103851e-27	Gohir.1Z049380/Gohir.1Z049480/Gohir.1Z049799/Gohir.1Z049866/Gohir.1Z049880/Gohir.1Z049966/Gohir.1Z050080/Gohir.1Z050180/Gohir.1Z050366/Gohir.1Z050380/Gohir.1Z050692/Gohir.1Z078400/Gohir.1Z078501/Gohir.1Z078601/Gohir.1Z078801/Gohir.A01G104300/Gohir.A01G128325/Gohir.A01G137760/Gohir.A01G150018/Gohir.A01G156900/Gohir.A02G022101/Gohir.A02G100500/Gohir.A02G107104/Gohir.A03G093700/Gohir.A03G137700/Gohi…
ko00190	Oxidative phosphorylation	69	1868	399	23929	2.2152557517992	3.05752341125611e-10	4.75444890450325e-08	Gohir.1Z049399/Gohir.1Z049431/Gohir.1Z049499/Gohir.1Z049531/Gohir.1Z049581/Gohir.1Z049599/Gohir.1Z049679/Gohir.1Z049694/Gohir.1Z049731/Gohir.1Z049799/Gohir.A01G109000/Gohir.A01G112200/Gohir.A01G113400/Gohir.A01G138200/Gohir.A01G139542/Gohir.A01G165350/Gohir.A02G087000/Gohir.A02G109706/Gohir.A02G112400/Gohir.A02G134105/Gohir.A02G134500/Gohir.A02G134600/Gohir.A02G169500/Gohir.A03G108600/Gohir.A04G0…
ko03020	RNA polymerase	18	1868	114	23929	2.02262481686014	0.00315104207553355	0.326658028496978	Gohir.A02G106900/Gohir.A02G174500/Gohir.A06G113000/Gohir.A06G119302/Gohir.A08G082700/Gohir.A08G124200/Gohir.A10G084400/Gohir.A12G025100/Gohir.D01G029500/Gohir.D01G102099/Gohir.D02G179050/Gohir.D06G063650/Gohir.D07G180800/Gohir.D07G184100/Gohir.D07G215200/Gohir.D09G041350/Gohir.D12G077902/Gohir.D12G094332
ko01040	Biosynthesis of unsaturated fatty acids	12	1868	72	23929	2.13499286224126	0.00945963866294125	0.735486906043682	Gohir.A01G137617/Gohir.A01G137630/Gohir.A10G085600/Gohir.A10G121400/Gohir.A11G200400/Gohir.A11G206700/Gohir.A11G232000/Gohir.D02G110000/Gohir.D05G328200/Gohir.D10G122700/Gohir.D11G223300/Gohir.D11G243200
ko00627	Aminobenzoate degradation	4	1868	16	23929	3.20248929336188	0.0315256043518898	0.999430327425721	Gohir.A11G264000/Gohir.D01G023550/Gohir.D04G110501/Gohir.D09G142300
ko04391	Hippo signaling pathway - fly	15	1868	117	23929	1.64230220172404	0.0388603864875875	0.999430327425721	Gohir.A01G132500/Gohir.A02G105900/Gohir.A02G106000/Gohir.A06G065100/Gohir.A07G173300/Gohir.A08G094486/Gohir.A11G028180/Gohir.A11G223800/Gohir.A13G053582/Gohir.D02G084700/Gohir.D03G072700/Gohir.D05G322500/Gohir.D07G180100/Gohir.D08G171900/Gohir.D10G155700
ko03010	Ribosome	96	1868	1036	23929	1.1870230585434	0.0441928062180478	0.999430327425721	Gohir.1Z049366/Gohir.1Z049594/Gohir.1Z049834/Gohir.1Z049902/Gohir.1Z049931/Gohir.1Z049934/Gohir.1Z050034/Gohir.1Z050134/Gohir.1Z050166/Gohir.1Z050234/Gohir.1Z050480/Gohir.1Z050566/Gohir.A01G073000/Gohir.A01G136200/Gohir.A01G139101/Gohir.A01G140394/Gohir.A02G100900/Gohir.A02G134106/Gohir.A03G092800/Gohir.A03G094200/Gohir.A03G135500/Gohir.A04G035600/Gohir.A04G039075/Gohir.A04G039090/Gohir.A04G03936…
ko00904	Diterpenoid biosynthesis	9	1868	65	23929	1.77368637786197	0.0647053943629467	0.999430327425721	Gohir.A03G111100/Gohir.A07G092600/Gohir.A08G158350/Gohir.A08G158500/Gohir.A09G052000/Gohir.A12G123001/Gohir.D01G085000/Gohir.D06G163800/Gohir.D13G156300
ko00966	Glucosinolate biosynthesis	6	1868	38	23929	2.02262481686014	0.0722150819333023	0.999430327425721	Gohir.A01G142101/Gohir.A05G109400/Gohir.A05G319100/Gohir.D05G109800/Gohir.D07G198900/Gohir.D07G199100
ko00380	Tryptophan metabolism	15	1868	128	23929	1.50116685626338	0.0741063304011486	0.999430327425721	Gohir.A01G142101/Gohir.A02G114800/Gohir.A05G319100/Gohir.A06G045700/Gohir.A06G062700/Gohir.A07G153900/Gohir.A10G119700/Gohir.A10G146500/Gohir.A11G264000/Gohir.A13G092700/Gohir.D01G023550/Gohir.D02G079800/Gohir.D06G061000/Gohir.D06G095000/Gohir.D10G146900
ko05323	Rheumatoid arthritis	11	1868	89	23929	1.58325313379689	0.0858410810309621	0.999430327425721	Gohir.A01G109000/Gohir.A01G113400/Gohir.A01G142800/Gohir.A02G087000/Gohir.A02G109706/Gohir.A02G169500/Gohir.A03G081901/Gohir.A13G086625/Gohir.D03G064500/Gohir.D05G338601/Gohir.D11G184900
ko04540	Gap junction	9	1868	71	23929	1.62379738818349	0.100261170687624	0.999430327425721	Gohir.A01G111100/Gohir.A02G079300/Gohir.A03G078000/Gohir.A06G108400/Gohir.D01G097800/Gohir.D02G087333/Gohir.D06G110500/Gohir.D07G009500/Gohir.D08G105000
ko00310	Lysine degradation	8	1868	62	23929	1.65289769979968	0.108251463182311	0.999430327425721	Gohir.A06G045700/Gohir.A06G082000/Gohir.A06G112504/Gohir.A10G091400/Gohir.D01G023550/Gohir.D02G079800/Gohir.D06G107000/Gohir.D06G116900
ko00908	Zeatin biosynthesis	8	1868	64	23929	1.60124464668094	0.124052992089665	0.999430327425721	Gohir.A04G098300/Gohir.A05G321400/Gohir.A06G081700/Gohir.A10G114600/Gohir.A12G054300/Gohir.D04G107700/Gohir.D05G193200/Gohir.D06G071500
ko04723	Retrograde endocannabinoid signaling	16	1868	153	23929	1.33960336454353	0.14186802945478	0.999430327425721	Gohir.1Z049581/Gohir.A01G165350/Gohir.A03G108600/Gohir.A05G366500/Gohir.A07G170100/Gohir.A08G076200/Gohir.A10G188200/Gohir.A12G147700/Gohir.A12G229700/Gohir.A13G078866/Gohir.D01G059800/Gohir.D03G074600/Gohir.D05G294800/Gohir.D08G147600/Gohir.D11G334151/Gohir.D13G105200
ko03450	Non-homologous end-joining	3	1868	17	23929	2.26058067766721	0.142417624378983	0.999430327425721	Gohir.A04G025700/Gohir.D01G132600/Gohir.D10G183600
ko04964	Proximal tubule bicarbonate reclamation	3	1868	17	23929	2.26058067766721	0.142417624378983	0.999430327425721	Gohir.A10G111200/Gohir.A12G096100/Gohir.A12G212900
ko04730	Long-term depression	5	1868	36	23929	1.77916071853438	0.146001671879604	0.999430327425721	Gohir.A08G094486/Gohir.A11G028180/Gohir.A13G053582/Gohir.D05G322500/Gohir.D07G009500
ko04145	Phagosome	28	1868	292	23929	1.22835205772785	0.150981559077678	0.999430327425721	Gohir.A01G109000/Gohir.A01G111100/Gohir.A01G113400/Gohir.A02G079300/Gohir.A02G083300/Gohir.A02G087000/Gohir.A02G109706/Gohir.A02G169500/Gohir.A03G078000/Gohir.A03G193900/Gohir.A06G108400/Gohir.A08G137366/Gohir.A08G154700/Gohir.A09G199800/Gohir.A12G037300/Gohir.A12G092466/Gohir.A13G086625/Gohir.D01G097800/Gohir.D02G087333/Gohir.D03G064500/Gohir.D05G338601/Gohir.D06G060300/Gohir.D06G110500/Gohir.D0…
ko04977	Vitamin digestion and absorption	2	1868	9	23929	2.84665714965501	0.152106196884981	0.999430327425721	Gohir.A07G153100/Gohir.A11G134000
ko03460	Fanconi anemia pathway	10	1868	89	23929	1.43932103072444	0.155363093369371	0.999430327425721	Gohir.A03G139700/Gohir.A05G245600/Gohir.A06G062500/Gohir.A07G185533/Gohir.A08G135700/Gohir.A10G131800/Gohir.A12G035900/Gohir.D02G113000/Gohir.D09G062000/Gohir.D13G109000
ko05134	Legionellosis	15	1868	146	23929	1.31609149042269	0.167100038149289	0.999430327425721	Gohir.A01G140607/Gohir.A03G060300/Gohir.A04G072300/Gohir.A05G345800/Gohir.A08G120900/Gohir.A09G147700/Gohir.A10G207701/Gohir.A12G076800/Gohir.D01G149100/Gohir.D04G110800/Gohir.D10G058400/Gohir.D12G044100/Gohir.D13G099600/Gohir.D13G114900/Gohir.D13G116500
ko00750	Vitamin B6 metabolism	5	1868	38	23929	1.68552068071678	0.171773024685146	0.999430327425721	Gohir.A07G170700/Gohir.A08G102800/Gohir.A10G061800/Gohir.D07G177500/Gohir.D08G114400
ko00450	Selenocompound metabolism	5	1868	39	23929	1.64230220172404	0.185272215636561	0.999430327425721	Gohir.A11G308100/Gohir.A12G240000/Gohir.A13G097500/Gohir.D11G314900/Gohir.D13G102200
ko00600	Sphingolipid metabolism	9	1868	82	23929	1.40597090928083	0.188771389745329	0.999430327425721	Gohir.A03G100000/Gohir.A03G100100/Gohir.A03G100200/Gohir.A06G205800/Gohir.A10G122500/Gohir.A13G096600/Gohir.D02G125100/Gohir.D02G125200/Gohir.D02G125300
ko04711	Circadian rhythm - fly	3	1868	20	23929	1.92149357601713	0.201796866352936	0.999430327425721	Gohir.A01G139200/Gohir.A06G065100/Gohir.D10G155700
ko00900	Terpenoid backbone biosynthesis	14	1868	141	23929	1.27191064133522	0.211109485349742	0.999430327425721	Gohir.A03G067100/Gohir.A04G063700/Gohir.A08G090186/Gohir.A08G114400/Gohir.A09G105100/Gohir.A09G164800/Gohir.A11G091500/Gohir.A12G085400/Gohir.D01G206500/Gohir.D03G093600/Gohir.D08G103801/Gohir.D10G165100/Gohir.D12G018700/Gohir.D13G057851
ko00061	Fatty acid biosynthesis	13	1868	131	23929	1.27121712408258	0.222562257819264	0.999430327425721	Gohir.1Z049999/Gohir.A04G058000/Gohir.A06G079000/Gohir.A07G163654/Gohir.A10G085700/Gohir.A13G078866/Gohir.D01G059800/Gohir.D01G102333/Gohir.D02G110000/Gohir.D05G328200/Gohir.D09G054600/Gohir.D10G122700/Gohir.D13G105200
ko05033	Nicotine addiction	3	1868	21	23929	1.82999388192108	0.222729509246939	0.999430327425721	Gohir.A05G366500/Gohir.D03G074600/Gohir.D05G294800
ko04722	Neurotrophin signaling pathway	13	1868	132	23929	1.26158669132438	0.23056501904498	0.999430327425721	Gohir.A01G132500/Gohir.A02G083300/Gohir.A07G173300/Gohir.A10G173200/Gohir.A11G224200/Gohir.A12G037300/Gohir.D02G084700/Gohir.D05G291500/Gohir.D06G134800/Gohir.D07G009500/Gohir.D07G180100/Gohir.D07G195600/Gohir.D11G238500
ko04390	Hippo signaling pathway	12	1868	121	23929	1.27040897587909	0.234948818374755	0.999430327425721	Gohir.A01G132500/Gohir.A02G089400/Gohir.A06G065100/Gohir.A07G173300/Gohir.A08G094486/Gohir.A11G028180/Gohir.A13G053582/Gohir.D02G084700/Gohir.D05G322500/Gohir.D07G180100/Gohir.D08G171900/Gohir.D10G155700
ko04013	MAPK signaling pathway - fly	15	1868	156	23929	1.23172665129303	0.236665965834323	0.999430327425721	Gohir.A02G083300/Gohir.A02G139900/Gohir.A05G281100/Gohir.A08G095400/Gohir.A09G116400/Gohir.A10G136400/Gohir.A10G178700/Gohir.A11G028180/Gohir.A12G037300/Gohir.D01G125000/Gohir.D03G057600/Gohir.D05G322500/Gohir.D06G134800/Gohir.D07G009500/Gohir.D08G107200
ko05120	Epithelial cell signaling in Helicobacter pylori infection	11	1868	110	23929	1.28099571734475	0.239314197613411	0.999430327425721	Gohir.A01G109000/Gohir.A01G113400/Gohir.A02G083300/Gohir.A02G087000/Gohir.A02G109706/Gohir.A02G169500/Gohir.A12G037300/Gohir.A13G086625/Gohir.D03G064500/Gohir.D06G134800/Gohir.D11G184900
ko00540	Lipopolysaccharide biosynthesis	3	1868	22	23929	1.74681234183376	0.244060803756512	0.999430327425721	Gohir.A07G149400/Gohir.A08G080300/Gohir.A11G131450
ko00903	Limonene and pinene degradation	3	1868	22	23929	1.74681234183376	0.244060803756512	0.999430327425721	Gohir.A06G045700/Gohir.D01G023550/Gohir.D02G079800
ko00130	Ubiquinone and other terpenoid-quinone biosynthesis	10	1868	100	23929	1.28099571734475	0.253296541593823	0.999430327425721	Gohir.A03G179900/Gohir.A04G049100/Gohir.A07G080400/Gohir.A10G117300/Gohir.A10G178100/Gohir.A11G186500/Gohir.D03G050600/Gohir.D03G116900/Gohir.D03G138200/Gohir.D12G001700
ko00860	Porphyrin and chlorophyll metabolism	11	1868	112	23929	1.25812079382074	0.257623556625696	0.999430327425721	Gohir.A02G069400/Gohir.A03G067100/Gohir.A04G042000/Gohir.A05G340200/Gohir.A09G105100/Gohir.A10G063300/Gohir.A10G124100/Gohir.D03G093600/Gohir.D03G154700/Gohir.D05G237801/Gohir.D07G051300
ko00940	Phenylpropanoid biosynthesis	35	1868	401	23929	1.11807606252036	0.268847145237363	0.999430327425721	Gohir.1Z049547/Gohir.A01G142201/Gohir.A01G143600/Gohir.A01G218750/Gohir.A02G090100/Gohir.A02G125200/Gohir.A04G073300/Gohir.A04G075400/Gohir.A06G111202/Gohir.A06G122200/Gohir.A06G146900/Gohir.A08G078800/Gohir.A08G105100/Gohir.A09G061300/Gohir.A09G148900/Gohir.A10G178100/Gohir.A12G021900/Gohir.A12G065700/Gohir.D01G133700/Gohir.D02G134600/Gohir.D02G134700/Gohir.D03G050600/Gohir.D03G138200/Gohir.D06G…
ko00340	Histidine metabolism	5	1868	45	23929	1.4233285748275	0.272948555988341	0.999430327425721	Gohir.A04G062600/Gohir.A06G045700/Gohir.A09G051200/Gohir.D02G079800/Gohir.D10G186800
ko05032	Morphine addiction	3	1868	24	23929	1.60124464668094	0.28754059262734	0.999430327425721	Gohir.A05G366500/Gohir.D03G074600/Gohir.D05G294800
ko04664	Fc epsilon RI signaling pathway	5	1868	46	23929	1.39238664928778	0.288382500375239	0.999430327425721	Gohir.A02G083300/Gohir.A12G037300/Gohir.D05G291500/Gohir.D06G134800/Gohir.D07G009500
ko05130	Pathogenic Escherichia coli infection	24	1868	272	23929	1.13029033883361	0.295277801367514	0.999430327425721	Gohir.A01G111100/Gohir.A01G141263/Gohir.A02G079300/Gohir.A02G083300/Gohir.A03G060300/Gohir.A03G078000/Gohir.A06G045200/Gohir.A06G108400/Gohir.A08G089300/Gohir.A08G120900/Gohir.A10G119200/Gohir.A12G037300/Gohir.D01G097800/Gohir.D01G149100/Gohir.D02G087333/Gohir.D06G110500/Gohir.D06G134800/Gohir.D07G059600/Gohir.D08G100500/Gohir.D08G105000/Gohir.D12G044100/Gohir.D13G106101/Gohir.D13G116500/Gohir.D1…
ko00909	Sesquiterpenoid and triterpenoid biosynthesis	6	1868	58	23929	1.32516798346009	0.298235162548619	0.999430327425721	Gohir.A01G072700/Gohir.A04G023400/Gohir.A06G102900/Gohir.D11G293700/Gohir.D13G147000/Gohir.D13G147100
ko03320	PPAR signaling pathway	10	1868	105	23929	1.21999592128072	0.303515509723514	0.999430327425721	Gohir.A01G131900/Gohir.A02G117500/Gohir.A10G085600/Gohir.A10G121400/Gohir.A11G200400/Gohir.D05G047300/Gohir.D05G291500/Gohir.D09G054600/Gohir.D10G067100/Gohir.D11G223300
ko04142	Lysosome	17	1868	190	23929	1.14615406288741	0.314725035570324	0.999430327425721	Gohir.A01G113400/Gohir.A01G142800/Gohir.A02G109706/Gohir.A02G169500/Gohir.A03G081901/Gohir.A05G301800/Gohir.A05G372900/Gohir.A12G144500/Gohir.A13G086625/Gohir.A13G194600/Gohir.D03G064500/Gohir.D05G222800/Gohir.D05G338601/Gohir.D11G159350/Gohir.D11G184900/Gohir.D11G278000/Gohir.D12G263700
ko04011	MAPK signaling pathway - yeast	12	1868	130	23929	1.18245758524131	0.315775585694614	0.999430327425721	Gohir.A01G132500/Gohir.A02G112716/Gohir.A04G147700/Gohir.A05G174800/Gohir.A07G173300/Gohir.A09G031100/Gohir.D02G084700/Gohir.D03G067500/Gohir.D04G108600/Gohir.D05G291500/Gohir.D07G180100/Gohir.D09G081300
ko04623	Cytosolic DNA-sensing pathway	7	1868	71	23929	1.26295352414272	0.317448229793453	0.999430327425721	Gohir.A06G113000/Gohir.A06G119302/Gohir.A08G082700/Gohir.A08G124200/Gohir.D07G180800/Gohir.D07G184100/Gohir.D09G041350
ko00440	Phosphonate and phosphinate metabolism	2	1868	15	23929	1.707994289793	0.329266015755361	0.999430327425721	Gohir.A07G184500/Gohir.A13G092200
ko03410	Base excision repair	8	1868	85	23929	1.20564302808918	0.344707643452236	0.999430327425721	Gohir.A01G051100/Gohir.A02G122500/Gohir.A02G123602/Gohir.A04G057300/Gohir.D01G132600/Gohir.D03G074900/Gohir.D04G090500/Gohir.D10G183600
ko00930	Caprolactam degradation	3	1868	27	23929	1.4233285748275	0.353526496383106	0.999430327425721	Gohir.A04G085100/Gohir.D01G023550/Gohir.D03G106800
ko04550	Signaling pathways regulating pluripotency of stem cells	2	1868	16	23929	1.60124464668094	0.358572179106359	0.999430327425721	Gohir.A12G152800/Gohir.D07G009500
ko00740	Riboflavin metabolism	4	1868	39	23929	1.31384176137923	0.363023909143385	0.999430327425721	Gohir.A01G142800/Gohir.A03G081901/Gohir.A13G086435/Gohir.D03G130200
ko04064	NF-kappa B signaling pathway	4	1868	39	23929	1.31384176137923	0.363023909143385	0.999430327425721	Gohir.A08G140000/Gohir.A12G073200/Gohir.D11G207100/Gohir.D12G214800
ko00710	Carbon fixation in photosynthetic organisms	16	1868	184	23929	1.11390931943022	0.364028411739297	0.999430327425721	Gohir.1Z049899/Gohir.A02G112704/Gohir.A02G117500/Gohir.A04G065600/Gohir.A04G065642/Gohir.A05G178000/Gohir.A08G000400/Gohir.A10G111200/Gohir.A12G096100/Gohir.A12G150100/Gohir.A13G030500/Gohir.D04G103800/Gohir.D05G047300/Gohir.D07G180900/Gohir.D10G067100/Gohir.D12G181300
ko04972	Pancreatic secretion	10	1868	111	23929	1.15405019580608	0.366540256277184	0.999430327425721	Gohir.A02G083300/Gohir.A05G202200/Gohir.A05G302500/Gohir.A06G133200/Gohir.A10G135900/Gohir.A12G037300/Gohir.A13G090400/Gohir.D04G065100/Gohir.D05G214200/Gohir.D06G134800
ko04810	Regulation of actin cytoskeleton	16	1868	185	23929	1.10788818797384	0.372276390119266	0.999430327425721	Gohir.A01G141263/Gohir.A01G166900/Gohir.A01G220300/Gohir.A02G083300/Gohir.A02G089400/Gohir.A02G112716/Gohir.A07G148500/Gohir.A08G089300/Gohir.A12G037300/Gohir.D03G057600/Gohir.D03G067500/Gohir.D04G108600/Gohir.D06G134800/Gohir.D07G009500/Gohir.D08G100500/Gohir.D13G106101
ko00592	alpha-Linolenic acid metabolism	12	1868	137	23929	1.12204004438957	0.382643254185862	0.999430327425721	Gohir.1Z049361/Gohir.A02G083700/Gohir.A03G115300/Gohir.A04G057600/Gohir.A06G064100/Gohir.A10G085600/Gohir.A10G121400/Gohir.A11G200400/Gohir.A12G030500/Gohir.A12G097200/Gohir.D04G092650/Gohir.D11G223300
ko00565	Ether lipid metabolism	6	1868	64	23929	1.20093348501071	0.383212259220828	0.999430327425721	Gohir.A01G117200/Gohir.A10G167300/Gohir.A11G084300/Gohir.A13G083200/Gohir.A13G092200/Gohir.D11G039900
ko00620	Pyruvate metabolism	20	1868	236	23929	1.08558959097013	0.384467544741782	0.999430327425721	Gohir.1Z049999/Gohir.A02G117500/Gohir.A06G045700/Gohir.A06G094000/Gohir.A07G163654/Gohir.A08G083100/Gohir.A08G096300/Gohir.A08G097100/Gohir.A10G111200/Gohir.A11G126600/Gohir.A12G096100/Gohir.D01G102333/Gohir.D02G058100/Gohir.D02G079800/Gohir.D04G110501/Gohir.D05G047300/Gohir.D09G142300/Gohir.D10G067100/Gohir.D10G131900/Gohir.D13G067700
ko04714	Thermogenesis	35	1868	424	23929	1.05742571007232	0.390155505254815	0.999430327425721	Gohir.1Z049581/Gohir.A01G138200/Gohir.A01G165350/Gohir.A02G112400/Gohir.A03G108600/Gohir.A07G170100/Gohir.A08G076200/Gohir.A09G068500/Gohir.A10G105800/Gohir.A10G147600/Gohir.A10G188200/Gohir.A12G093625/Gohir.A12G094100/Gohir.A12G133400/Gohir.A12G147700/Gohir.A12G229700/Gohir.A13G078866/Gohir.A13G117400/Gohir.D01G059800/Gohir.D04G086500/Gohir.D04G096432/Gohir.D06G053900/Gohir.D06G123400/Gohir.D07G…
ko00460	Cyanoamino acid metabolism	9	1868	101	23929	1.1414813322874	0.390527896949705	0.999430327425721	Gohir.A01G218750/Gohir.A05G109400/Gohir.A06G087701/Gohir.A06G146900/Gohir.D05G109800/Gohir.D05G264400/Gohir.D07G198900/Gohir.D07G199100/Gohir.D11G207000
ko04380	Osteoclast differentiation	7	1868	77	23929	1.1645415612225	0.395422326488902	0.999430327425721	Gohir.A01G142800/Gohir.A02G083300/Gohir.A03G081901/Gohir.A04G059852/Gohir.A12G037300/Gohir.D06G134800/Gohir.D07G009500
ko00591	Linoleic acid metabolism	3	1868	29	23929	1.32516798346009	0.397170131882166	0.999430327425721	Gohir.D08G227100/Gohir.D08G227200/Gohir.D13G111000
ko03013	RNA transport	36	1868	439	23929	1.05047484793647	0.403657533108867	0.999430327425721	Gohir.A01G122600/Gohir.A02G082700/Gohir.A02G105904/Gohir.A02G139900/Gohir.A02G141500/Gohir.A03G115400/Gohir.A05G322508/Gohir.A05G345800/Gohir.A06G112400/Gohir.A06G128300/Gohir.A07G035800/Gohir.A08G108000/Gohir.A08G236300/Gohir.A10G117900/Gohir.A10G207701/Gohir.A11G274000/Gohir.A11G309600/Gohir.A12G069000/Gohir.A12G073200/Gohir.A12G076800/Gohir.A12G243300/Gohir.A13G042600/Gohir.D01G014400/Gohir.D0…
ko00240	Pyrimidine metabolism	12	1868	140	23929	1.09799632915265	0.411785461924024	0.999430327425721	Gohir.A06G073500/Gohir.A07G228500/Gohir.A09G035100/Gohir.A09G055900/Gohir.A10G058200/Gohir.A10G110000/Gohir.A11G227533/Gohir.A12G189700/Gohir.A13G074800/Gohir.A13G095700/Gohir.D05G373500/Gohir.D13G089700
ko00950	Isoquinoline alkaloid biosynthesis	5	1868	54	23929	1.18610714568959	0.414845108330224	0.999430327425721	Gohir.A06G125800/Gohir.A06G125904/Gohir.A12G144700/Gohir.D06G181900/Gohir.D06G211300
ko00981	Insect hormone biosynthesis	2	1868	18	23929	1.4233285748275	0.415625067381455	0.999430327425721	Gohir.A06G045700/Gohir.D02G079800
ko04330	Notch signaling pathway	3	1868	30	23929	1.28099571734475	0.418702323501877	0.999430327425721	Gohir.A11G224200/Gohir.D09G093800/Gohir.D11G238500
ko00510	N-Glycan biosynthesis	10	1868	116	23929	1.10430665288341	0.420121090847304	0.999430327425721	Gohir.1Z049473/Gohir.A01G158900/Gohir.A02G117800/Gohir.A09G052700/Gohir.A11G220400/Gohir.A13G014500/Gohir.A13G082150/Gohir.D01G151500/Gohir.D02G101500/Gohir.D11G203200
ko05135	Yersinia infection	7	1868	79	23929	1.13505949638143	0.421562221098684	0.999430327425721	Gohir.A02G083300/Gohir.A02G112716/Gohir.A12G037300/Gohir.D03G067500/Gohir.D04G108600/Gohir.D06G134800/Gohir.D07G009500
ko00564	Glycerophospholipid metabolism	21	1868	254	23929	1.05909094741102	0.424854780148682	0.999430327425721	Gohir.A01G117200/Gohir.A03G077200/Gohir.A04G089100/Gohir.A05G315200/Gohir.A06G114200/Gohir.A07G184500/Gohir.A09G031100/Gohir.A10G167300/Gohir.A11G084300/Gohir.A12G090800/Gohir.A12G097200/Gohir.A13G083200/Gohir.A13G092200/Gohir.A13G109400/Gohir.D04G004700/Gohir.D04G129300/Gohir.D05G316600/Gohir.D05G316700/Gohir.D06G118700/Gohir.D11G039900/Gohir.D11G093700
ko05416	Viral myocarditis	5	1868	55	23929	1.1645415612225	0.430615325320562	0.999430327425721	Gohir.A02G083300/Gohir.A02G105904/Gohir.A08G236300/Gohir.A12G037300/Gohir.D06G134800
ko04962	Vasopressin-regulated water reabsorption	10	1868	117	23929	1.0948681344827	0.430853915195436	0.999430327425721	Gohir.A01G163100/Gohir.A05G302500/Gohir.A06G133200/Gohir.A09G213150/Gohir.A10G135900/Gohir.A10G165700/Gohir.D04G065100/Gohir.D06G060300/Gohir.D06G131800/Gohir.D07G195600
ko00230	Purine metabolism	19	1868	230	23929	1.05821385345871	0.433236893144958	0.999430327425721	Gohir.A02G111500/Gohir.A04G076000/Gohir.A06G073500/Gohir.A07G228500/Gohir.A08G083100/Gohir.A08G096300/Gohir.A08G097100/Gohir.A09G055900/Gohir.A10G058200/Gohir.A10G118575/Gohir.A12G049400/Gohir.A13G074800/Gohir.A13G086600/Gohir.D01G130900/Gohir.D01G142900/Gohir.D03G067400/Gohir.D05G113500/Gohir.D10G148100/Gohir.D12G075300
ko04620	Toll-like receptor signaling pathway	4	1868	43	23929	1.1916239231114	0.4353631110261	0.999430327425721	Gohir.A02G083300/Gohir.A12G037300/Gohir.D06G134800/Gohir.D07G009500
ko04392	Hippo signaling pathway - multiple species	3	1868	31	23929	1.23967327484976	0.439972205242986	0.999430327425721	Gohir.A06G065100/Gohir.D08G171900/Gohir.D10G155700
ko04670	Leukocyte transendothelial migration	3	1868	31	23929	1.23967327484976	0.439972205242986	0.999430327425721	Gohir.A02G083300/Gohir.A12G037300/Gohir.D06G134800
ko05140	Leishmaniasis	3	1868	31	23929	1.23967327484976	0.439972205242986	0.999430327425721	Gohir.A05G345800/Gohir.A10G207701/Gohir.A12G076800
ko04666	Fc gamma R-mediated phagocytosis	14	1868	169	23929	1.06117988419092	0.449013398176429	0.999430327425721	Gohir.A01G166900/Gohir.A01G220300/Gohir.A02G083300/Gohir.A02G112716/Gohir.A07G148500/Gohir.A08G089300/Gohir.A10G167300/Gohir.A11G084300/Gohir.A12G037300/Gohir.D03G067500/Gohir.D04G108600/Gohir.D06G134800/Gohir.D07G009500/Gohir.D08G100500
ko05160	Hepatitis C	10	1868	119	23929	1.07646698936534	0.45227344746377	0.999430327425721	Gohir.A01G132500/Gohir.A07G173300/Gohir.A08G094486/Gohir.A11G028180/Gohir.A11G309600/Gohir.A13G053582/Gohir.D02G084700/Gohir.D05G322500/Gohir.D07G009500/Gohir.D07G180100
ko04210	Apoptosis	7	1868	82	23929	1.09353292944064	0.460519379399425	0.999430327425721	Gohir.A02G079300/Gohir.A06G108400/Gohir.D02G087333/Gohir.D05G291500/Gohir.D05G338601/Gohir.D06G110500/Gohir.D07G009500
ko04146	Peroxisome	17	1868	209	23929	1.04195823898856	0.466649391149692	0.999430327425721	Gohir.A01G151200/Gohir.A05G208200/Gohir.A06G130200/Gohir.A07G144600/Gohir.A09G051300/Gohir.A10G085600/Gohir.A10G121400/Gohir.A10G178700/Gohir.A11G200400/Gohir.A12G091300/Gohir.A13G056300/Gohir.D06G107000/Gohir.D08G140100/Gohir.D09G054600/Gohir.D09G094500/Gohir.D11G223300/Gohir.D12G091800
ko00051	Fructose and mannose metabolism	11	1868	133	23929	1.05947014216483	0.466720496502198	0.999430327425721	Gohir.A02G087100/Gohir.A02G112704/Gohir.A03G028500/Gohir.A03G086800/Gohir.A04G065600/Gohir.A04G065642/Gohir.A06G151500/Gohir.A08G000400/Gohir.A13G030500/Gohir.D04G103800/Gohir.D12G052200
ko00281	Geraniol degradation	1	1868	8	23929	1.60124464668094	0.478130254359594	0.999430327425721	Gohir.D01G023550
ko05111	Biofilm formation - Vibrio cholerae	1	1868	8	23929	1.60124464668094	0.478130254359594	0.999430327425721	Gohir.A13G134101
ko04966	Collecting duct acid secretion	6	1868	71	23929	1.08253159212233	0.482235645135434	0.999430327425721	Gohir.A01G109000/Gohir.A01G113400/Gohir.A02G087000/Gohir.A02G169500/Gohir.A13G086625/Gohir.D11G184900
ko00010	Glycolysis / Gluconeogenesis	27	1868	339	23929	1.02026207576131	0.485891015157024	0.999430327425721	Gohir.A02G087100/Gohir.A02G112704/Gohir.A04G057600/Gohir.A04G065600/Gohir.A04G065642/Gohir.A04G085100/Gohir.A06G045700/Gohir.A06G151500/Gohir.A08G000400/Gohir.A08G083100/Gohir.A08G095500/Gohir.A08G096300/Gohir.A08G097100/Gohir.A09G020000/Gohir.A09G166700/Gohir.A13G030500/Gohir.D01G142900/Gohir.D02G058100/Gohir.D02G079800/Gohir.D02G108700/Gohir.D03G100000/Gohir.D03G106800/Gohir.D04G092650/Gohir.D0…
ko00071	Fatty acid degradation	11	1868	135	23929	1.04377428820684	0.486895136461365	0.999430327425721	Gohir.A04G057600/Gohir.A06G045700/Gohir.A06G064100/Gohir.A10G085600/Gohir.A10G121400/Gohir.A11G200400/Gohir.D01G023550/Gohir.D02G079800/Gohir.D04G092650/Gohir.D09G054600/Gohir.D11G223300
ko04062	Chemokine signaling pathway	4	1868	46	23929	1.11390931943022	0.488072758759376	0.999430327425721	Gohir.A02G083300/Gohir.A12G037300/Gohir.D06G134800/Gohir.D07G009500
ko00941	Flavonoid biosynthesis	9	1868	110	23929	1.04808740510025	0.492258236606582	0.999430327425721	Gohir.A05G241400/Gohir.A05G318401/Gohir.A10G121800/Gohir.A10G178100/Gohir.A13G120300/Gohir.D02G031600/Gohir.D06G201000/Gohir.D08G195100/Gohir.D10G181500
ko00970	Aminoacyl-tRNA biosynthesis	9	1868	110	23929	1.04808740510025	0.492258236606582	0.999430327425721	Gohir.A01G141700/Gohir.A02G091000/Gohir.A10G142700/Gohir.A11G237100/Gohir.D01G037300/Gohir.D01G130500/Gohir.D06G068800/Gohir.D06G151800/Gohir.D11G247600
ko04712	Circadian rhythm - plant	10	1868	124	23929	1.0330610623748	0.505212424967192	0.999430327425721	Gohir.A01G146436/Gohir.A05G241400/Gohir.A05G318401/Gohir.A05G343600/Gohir.A08G140000/Gohir.A10G121800/Gohir.A11G261900/Gohir.D02G031600/Gohir.D11G207100/Gohir.D12G214800
ko04024	cAMP signaling pathway	12	1868	150	23929	1.0247965738758	0.508441055837444	0.999430327425721	Gohir.A02G083300/Gohir.A02G089400/Gohir.A10G085600/Gohir.A10G167300/Gohir.A10G173200/Gohir.A11G084300/Gohir.A11G200400/Gohir.A12G037300/Gohir.D05G214200/Gohir.D06G134800/Gohir.D07G009500/Gohir.D11G223300
ko05110	Vibrio cholerae infection	12	1868	150	23929	1.0247965738758	0.508441055837444	0.999430327425721	Gohir.A01G109000/Gohir.A01G113400/Gohir.A02G087000/Gohir.A02G109706/Gohir.A02G169500/Gohir.A08G120900/Gohir.A08G137366/Gohir.A13G086625/Gohir.D01G149100/Gohir.D03G064500/Gohir.D11G184900/Gohir.D13G116500
ko04520	Adherens junction	6	1868	74	23929	1.03864517622548	0.523274346250328	0.999430327425721	Gohir.A02G083300/Gohir.A08G140000/Gohir.A12G037300/Gohir.D06G134800/Gohir.D11G207100/Gohir.D12G214800
ko04919	Thyroid hormone signaling pathway	7	1868	87	23929	1.03068620935785	0.523943267974542	0.999430327425721	Gohir.A03G144200/Gohir.A13G083200/Gohir.D05G214200/Gohir.D05G291500/Gohir.D07G009500/Gohir.D09G093800/Gohir.D11G039900
ko00410	beta-Alanine metabolism	9	1868	113	23929	1.02026207576131	0.525314964298505	0.999430327425721	Gohir.A06G045700/Gohir.A10G085600/Gohir.A11G200400/Gohir.A12G092200/Gohir.A12G144700/Gohir.D01G023550/Gohir.D02G079800/Gohir.D10G099600/Gohir.D11G223300
ko05017	Spinocerebellar ataxia	9	1868	113	23929	1.02026207576131	0.525314964298505	0.999430327425721	Gohir.A02G107105/Gohir.A03G088700/Gohir.A05G110300/Gohir.A13G099000/Gohir.D01G084100/Gohir.D02G114000/Gohir.D03G067300/Gohir.D05G214200/Gohir.D07G104100
ko04721	Synaptic vesicle cycle	13	1868	166	23929	1.0031894171977	0.537016931955779	0.999430327425721	Gohir.A01G109000/Gohir.A01G113400/Gohir.A02G087000/Gohir.A02G109706/Gohir.A02G169500/Gohir.A05G366500/Gohir.A13G086625/Gohir.D01G122400/Gohir.D03G064500/Gohir.D03G074600/Gohir.D05G294800/Gohir.D06G131800/Gohir.D11G184900
ko04530	Tight junction	14	1868	179	23929	1.00189609177802	0.537338954341541	0.999430327425721	Gohir.A02G079300/Gohir.A02G083300/Gohir.A05G174800/Gohir.A06G108400/Gohir.A08G094486/Gohir.A11G028180/Gohir.A12G037300/Gohir.A13G053582/Gohir.A13G090400/Gohir.D02G087333/Gohir.D05G322500/Gohir.D06G110500/Gohir.D06G134800/Gohir.D11G177400
ko05100	Bacterial invasion of epithelial cells	5	1868	62	23929	1.0330610623748	0.537372187773952	0.999430327425721	Gohir.A02G083300/Gohir.A08G089300/Gohir.A12G037300/Gohir.D06G134800/Gohir.D08G100500
ko04071	Sphingolipid signaling pathway	17	1868	218	23929	0.998941614443157	0.538430927472492	0.999430327425721	Gohir.A01G142300/Gohir.A02G083300/Gohir.A07G153100/Gohir.A08G094486/Gohir.A08G187300/Gohir.A10G161800/Gohir.A10G167300/Gohir.A11G028180/Gohir.A11G084300/Gohir.A11G134000/Gohir.A12G037300/Gohir.A13G053582/Gohir.A13G096600/Gohir.D05G291500/Gohir.D05G322500/Gohir.D06G134800/Gohir.D07G009500
ko00760	Nicotinate and nicotinamide metabolism	4	1868	49	23929	1.04571078966919	0.538650787302809	0.999430327425721	Gohir.A06G073500/Gohir.A09G055900/Gohir.A10G058200/Gohir.D07G227300
ko05146	Amoebiasis	3	1868	36	23929	1.06749643112063	0.540979668176707	0.999430327425721	Gohir.A03G193900/Gohir.A12G092466/Gohir.D06G060300
ko04075	Plant hormone signal transduction	66	1868	852	23929	0.992320626112133	0.545642241777314	0.999430327425721	Gohir.A01G111700/Gohir.A01G150200/Gohir.A02G038301/Gohir.A02G063700/Gohir.A02G083800/Gohir.A03G078424/Gohir.A03G088300/Gohir.A03G116700/Gohir.A04G061700/Gohir.A04G099100/Gohir.A05G304632/Gohir.A05G309100/Gohir.A06G108800/Gohir.A06G127202/Gohir.A08G062000/Gohir.A08G072700/Gohir.A08G109900/Gohir.A08G123300/Gohir.A08G189900/Gohir.A09G007900/Gohir.A09G135600/Gohir.A10G086300/Gohir.A10G107200/Gohir.A1…
ko00910	Nitrogen metabolism	7	1868	89	23929	1.00752472150711	0.548531526849818	0.999430327425721	Gohir.A01G193200/Gohir.A04G070700/Gohir.A12G212900/Gohir.D01G181700/Gohir.D04G099300/Gohir.D05G315700/Gohir.D11G207000
ko00062	Fatty acid elongation	6	1868	76	23929	1.01131240843007	0.549893033733101	0.999430327425721	Gohir.A08G123200/Gohir.A10G118600/Gohir.A11G206700/Gohir.A11G232000/Gohir.A12G115800/Gohir.D11G243200
ko00040	Pentose and glucuronate interconversions	25	1868	324	23929	0.988422621407989	0.55457622840214	0.999430327425721	Gohir.A01G157000/Gohir.A02G050900/Gohir.A02G123400/Gohir.A02G123401/Gohir.A02G123402/Gohir.A02G123406/Gohir.A02G125102/Gohir.A03G063500/Gohir.A04G085100/Gohir.A05G312001/Gohir.A07G082700/Gohir.A07G167900/Gohir.A07G224900/Gohir.A09G021600/Gohir.A09G031200/Gohir.A11G135800/Gohir.A13G052200/Gohir.D03G065600/Gohir.D03G065700/Gohir.D03G106800/Gohir.D05G217900/Gohir.D09G021000/Gohir.D09G026400/Gohir.D1…
ko00362	Benzoate degradation	1	1868	10	23929	1.28099571734475	0.556455421553785	0.999430327425721	Gohir.D01G023550
ko00471	D-Glutamine and D-glutamate metabolism	1	1868	10	23929	1.28099571734475	0.556455421553785	0.999430327425721	Gohir.A12G212900
ko04320	Dorso-ventral axis formation	1	1868	10	23929	1.28099571734475	0.556455421553785	0.999430327425721	Gohir.D07G009500
ko04929	GnRH secretion	1	1868	10	23929	1.28099571734475	0.556455421553785	0.999430327425721	Gohir.D07G009500
ko03060	Protein export	10	1868	129	23929	0.993019935926166	0.556615822389283	0.999430327425721	Gohir.A02G091400/Gohir.A02G096000/Gohir.A04G065342/Gohir.A05G311500/Gohir.A06G056700/Gohir.A08G137366/Gohir.A08G188600/Gohir.A12G120500/Gohir.D02G109200/Gohir.D10G139500
ko00500	Starch and sucrose metabolism	27	1868	351	23929	0.985381321034426	0.561088017409906	0.999430327425721	Gohir.A01G218750/Gohir.A02G107101/Gohir.A02G115000/Gohir.A02G135000/Gohir.A02G144100/Gohir.A04G065400/Gohir.A04G068800/Gohir.A04G147700/Gohir.A05G192300/Gohir.A05G202200/Gohir.A05G408400/Gohir.A06G079600/Gohir.A06G103200/Gohir.A06G116500/Gohir.A06G146900/Gohir.A08G080000/Gohir.A08G082500/Gohir.A08G087400/Gohir.A11G200216/Gohir.D01G142900/Gohir.D02G136400/Gohir.D03G107700/Gohir.D05G338300/Gohir.D0…
ko04510	Focal adhesion	6	1868	78	23929	0.985381321034426	0.575817463741662	0.999430327425721	Gohir.A02G083300/Gohir.A02G089400/Gohir.A12G037300/Gohir.D05G291500/Gohir.D06G134800/Gohir.D07G009500
ko00511	Other glycan degradation	3	1868	38	23929	1.01131240843007	0.578334766429772	0.999430327425721	Gohir.A02G171700/Gohir.A10G122500/Gohir.D12G263700
ko00640	Propanoate metabolism	8	1868	105	23929	0.975996737024574	0.581148401834321	0.999430327425721	Gohir.1Z049999/Gohir.A07G163654/Gohir.A10G085600/Gohir.A11G200400/Gohir.D01G023550/Gohir.D01G102333/Gohir.D10G099600/Gohir.D11G223300
ko04960	Aldosterone-regulated sodium reabsorption	1	1868	11	23929	1.1645415612225	0.591094882757745	0.999430327425721	Gohir.D05G291500
ko03030	DNA replication	8	1868	106	23929	0.96678922063755	0.592072683260471	0.999430327425721	Gohir.A01G051100/Gohir.A03G117000/Gohir.A03G139700/Gohir.A05G333800/Gohir.D02G240100/Gohir.D04G090500/Gohir.D10G183600/Gohir.D11G114800
ko02010	ABC transporters	5	1868	66	23929	0.970451301018753	0.594055778752004	0.999430327425721	Gohir.A01G131111/Gohir.A07G153100/Gohir.A08G094300/Gohir.A11G134000/Gohir.A12G120300
ko03440	Homologous recombination	8	1868	107	23929	0.957753807360564	0.602856158890731	0.999430327425721	Gohir.A01G051100/Gohir.A01G128300/Gohir.A03G121000/Gohir.A03G139700/Gohir.A04G025700/Gohir.A08G135700/Gohir.A10G131800/Gohir.D04G090500
ko00680	Methane metabolism	10	1868	134	23929	0.955966953242353	0.605773768527031	0.999430327425721	Gohir.A02G112704/Gohir.A04G065600/Gohir.A04G065642/Gohir.A06G087701/Gohir.A07G170700/Gohir.A13G030500/Gohir.D02G108700/Gohir.D03G100000/Gohir.D04G103800/Gohir.D07G177500
ko02024	Quorum sensing	12	1868	161	23929	0.954779416654475	0.609125346679287	0.999430327425721	Gohir.A01G157000/Gohir.A03G063500/Gohir.A05G312001/Gohir.A07G224900/Gohir.A09G021600/Gohir.A09G031200/Gohir.A11G135800/Gohir.A13G052200/Gohir.A13G083200/Gohir.D09G021000/Gohir.D09G054600/Gohir.D11G039900
ko00561	Glycerolipid metabolism	16	1868	215	23929	0.953299138489119	0.61624668918566	0.999430327425721	Gohir.A02G122900/Gohir.A03G077200/Gohir.A04G085100/Gohir.A04G089100/Gohir.A05G315200/Gohir.A06G045700/Gohir.A07G106700/Gohir.A08G076200/Gohir.A12G090800/Gohir.D02G079800/Gohir.D03G106800/Gohir.D04G129300/Gohir.D05G316600/Gohir.D05G316700/Gohir.D11G059600/Gohir.D11G093700
ko04650	Natural killer cell mediated cytotoxicity	5	1868	68	23929	0.941908615694672	0.620897601361378	0.999430327425721	Gohir.A02G083300/Gohir.A04G059852/Gohir.A12G037300/Gohir.D06G134800/Gohir.D07G009500
ko00350	Tyrosine metabolism	8	1868	109	23929	0.940180343005324	0.623980080014177	0.999430327425721	Gohir.A04G057600/Gohir.A06G125800/Gohir.A06G125904/Gohir.A07G080400/Gohir.A12G144700/Gohir.D04G092650/Gohir.D06G181900/Gohir.D06G211300
ko00030	Pentose phosphate pathway	10	1868	136	23929	0.941908615694672	0.624677981952763	0.999430327425721	Gohir.A02G087100/Gohir.A02G112704/Gohir.A04G065600/Gohir.A04G065642/Gohir.A06G151500/Gohir.A12G150100/Gohir.A13G030500/Gohir.D01G142900/Gohir.D04G103800/Gohir.D12G181300
ko05152	Tuberculosis	19	1868	256	23929	0.950739008966809	0.625047168225988	0.999430327425721	Gohir.A01G113400/Gohir.A02G107105/Gohir.A02G109706/Gohir.A02G169500/Gohir.A03G193900/Gohir.A04G059852/Gohir.A05G110300/Gohir.A10G173200/Gohir.A12G055300/Gohir.A12G092466/Gohir.A13G086625/Gohir.D03G064500/Gohir.D03G067300/Gohir.D05G179300/Gohir.D06G060300/Gohir.D11G184900/Gohir.D12G018000/Gohir.D13G099600/Gohir.D13G136500
ko00531	Glycosaminoglycan degradation	3	1868	41	23929	0.937313939520551	0.630634198389342	0.999430327425721	Gohir.A05G372900/Gohir.A08G092300/Gohir.D11G278000
ko00360	Phenylalanine metabolism	6	1868	83	23929	0.926021000490183	0.637140623424117	0.999430327425721	Gohir.A04G073300/Gohir.A07G080400/Gohir.A09G148900/Gohir.A11G264000/Gohir.A12G144700/Gohir.D01G023550
ko00330	Arginine and proline metabolism	10	1868	138	23929	0.928257766191851	0.643103047444978	0.999430327425721	Gohir.A03G096300/Gohir.A04G091000/Gohir.A04G123600/Gohir.A06G045700/Gohir.A11G264000/Gohir.A12G092200/Gohir.D02G079800/Gohir.D02G112201/Gohir.D10G162166/Gohir.D11G206100
ko04662	B cell receptor signaling pathway	5	1868	70	23929	0.914996940960538	0.646653054033496	0.999430327425721	Gohir.A02G083300/Gohir.A04G059852/Gohir.A12G037300/Gohir.D06G134800/Gohir.D07G009500
ko00780	Biotin metabolism	3	1868	42	23929	0.914996940960538	0.647033973595271	0.999430327425721	Gohir.A04G058000/Gohir.A06G079000/Gohir.A10G085700
ko04115	p53 signaling pathway	6	1868	84	23929	0.914996940960538	0.648753552255707	0.999430327425721	Gohir.A05G281100/Gohir.A07G228500/Gohir.A08G072900/Gohir.A12G035900/Gohir.D01G125000/Gohir.D08G107200
ko04725	Cholinergic synapse	1	1868	13	23929	0.985381321034426	0.652473063702165	0.999430327425721	Gohir.D07G009500
ko04926	Relaxin signaling pathway	1	1868	13	23929	0.985381321034426	0.652473063702165	0.999430327425721	Gohir.D07G009500
ko05164	Influenza A	12	1868	167	23929	0.920475964559105	0.659681011936808	0.999430327425721	Gohir.A02G139900/Gohir.A03G071250/Gohir.A05G302500/Gohir.A06G133200/Gohir.A08G108000/Gohir.A10G135900/Gohir.A12G243300/Gohir.A13G079300/Gohir.D03G097800/Gohir.D04G065100/Gohir.D07G009500/Gohir.D13G095900
ko04015	Rap1 signaling pathway	6	1868	85	23929	0.904232271066885	0.660137256197252	0.999430327425721	Gohir.A02G083300/Gohir.A10G173200/Gohir.A12G037300/Gohir.D03G057600/Gohir.D06G134800/Gohir.D07G009500
ko04370	VEGF signaling pathway	5	1868	72	23929	0.88958035926719	0.671277706948363	0.999430327425721	Gohir.A02G083300/Gohir.A04G059852/Gohir.A12G037300/Gohir.D06G134800/Gohir.D07G009500
ko04139	Mitophagy - yeast	9	1868	128	23929	0.90070011375803	0.676082502221195	0.999430327425721	Gohir.A02G112716/Gohir.A03G144200/Gohir.A08G140000/Gohir.A13G075800/Gohir.A13G099000/Gohir.D03G067500/Gohir.D04G108600/Gohir.D11G207100/Gohir.D12G214800
ko04660	T cell receptor signaling pathway	3	1868	44	23929	0.873406170916878	0.678259011575659	0.999430327425721	Gohir.A04G059852/Gohir.D05G291500/Gohir.D07G009500
ko00260	Glycine, serine and threonine metabolism	11	1868	156	23929	0.903266210948224	0.68092747701492	0.999430327425721	Gohir.A02G122900/Gohir.A06G087701/Gohir.A06G146500/Gohir.A07G145000/Gohir.A07G170700/Gohir.A10G148200/Gohir.A12G144700/Gohir.D02G108700/Gohir.D06G107000/Gohir.D07G177500/Gohir.D13G144200
ko04310	Wnt signaling pathway	14	1868	197	23929	0.910352286437896	0.68173993961547	0.999430327425721	Gohir.A02G083300/Gohir.A04G059852/Gohir.A05G281100/Gohir.A06G065100/Gohir.A08G140000/Gohir.A11G224200/Gohir.A12G037300/Gohir.D01G125000/Gohir.D06G134800/Gohir.D08G107200/Gohir.D10G155700/Gohir.D11G207100/Gohir.D11G238500/Gohir.D12G214800
ko00920	Sulfur metabolism	6	1868	87	23929	0.883445322306727	0.68220233590197	0.999430327425721	Gohir.A02G018300/Gohir.A09G035500/Gohir.A10G128900/Gohir.A13G134101/Gohir.D12G075300/Gohir.D13G176700
ko04136	Autophagy - other	7	1868	101	23929	0.887818814001315	0.682471151796483	0.999430327425721	Gohir.A07G148000/Gohir.A08G137866/Gohir.A09G244600/Gohir.A10G147600/Gohir.A11G028180/Gohir.A13G099000/Gohir.D05G322500
ko04072	Phospholipase D signaling pathway	9	1868	129	23929	0.893717942333549	0.685042503208588	0.999430327425721	Gohir.A02G112716/Gohir.A08G120900/Gohir.A10G167300/Gohir.A11G084300/Gohir.D01G149100/Gohir.D03G067500/Gohir.D04G108600/Gohir.D07G009500/Gohir.D13G116500
ko05132	Salmonella infection	26	1868	362	23929	0.920052172678552	0.700361341201586	0.999430327425721	Gohir.A01G128500/Gohir.A01G141263/Gohir.A02G083300/Gohir.A03G052500/Gohir.A03G193900/Gohir.A04G071800/Gohir.A07G137000/Gohir.A08G089300/Gohir.A08G120900/Gohir.A09G009700/Gohir.A09G038200/Gohir.A09G213150/Gohir.A10G165700/Gohir.A12G037300/Gohir.A12G092466/Gohir.D01G149100/Gohir.D02G132200/Gohir.D02G209200/Gohir.D03G057600/Gohir.D06G060300/Gohir.D06G134800/Gohir.D07G009500/Gohir.D08G100500/Gohir.D0…
ko00333	Prodigiosin biosynthesis	1	1868	15	23929	0.853997144896502	0.704642336256585	0.999430327425721	Gohir.A04G058000
ko04216	Ferroptosis	5	1868	75	23929	0.853997144896502	0.706032951518333	0.999430327425721	Gohir.A04G095070/Gohir.A05G304500/Gohir.A11G224810/Gohir.A12G076500/Gohir.D09G054600
ko00513	Various types of N-glycan biosynthesis	6	1868	90	23929	0.853997144896502	0.71350487012409	0.999430327425721	Gohir.1Z049473/Gohir.A11G220400/Gohir.A13G014500/Gohir.D02G101500/Gohir.D09G014600/Gohir.D11G203200
ko00250	Alanine, aspartate and glutamate metabolism	9	1868	133	23929	0.866839207225773	0.71932852232672	0.999430327425721	Gohir.A01G126900/Gohir.A10G148200/Gohir.A11G227533/Gohir.A12G087900/Gohir.A12G212900/Gohir.A13G086600/Gohir.D05G264400/Gohir.D05G373500/Gohir.D07G227300
ko04360	Axon guidance	7	1868	105	23929	0.853997144896502	0.720997988452588	0.999430327425721	Gohir.A01G166900/Gohir.A01G220300/Gohir.A02G083300/Gohir.A04G059852/Gohir.A07G148500/Gohir.A12G037300/Gohir.D06G134800
ko00625	Chloroalkane and chloroalkene degradation	2	1868	32	23929	0.800622323340471	0.724939417762877	0.999430327425721	Gohir.A06G045700/Gohir.D02G079800
ko05220	Chronic myeloid leukemia	2	1868	32	23929	0.800622323340471	0.724939417762877	0.999430327425721	Gohir.D07G009500/Gohir.D09G093800
ko00196	Photosynthesis - antenna proteins	3	1868	49	23929	0.78428309225189	0.747215901942782	0.999430327425721	Gohir.A04G060200/Gohir.A06G164200/Gohir.A07G179000
ko01523	Antifolate resistance	3	1868	49	23929	0.78428309225189	0.747215901942782	0.999430327425721	Gohir.A06G087701/Gohir.A07G153100/Gohir.A11G134000
ko04918	Thyroid hormone synthesis	3	1868	49	23929	0.78428309225189	0.747215901942782	0.999430327425721	Gohir.A02G096000/Gohir.D02G132200/Gohir.D07G050300
ko00630	Glyoxylate and dicarboxylate metabolism	12	1868	179	23929	0.858768078666874	0.748937081705919	0.999430327425721	Gohir.1Z049899/Gohir.A01G193200/Gohir.A02G108400/Gohir.A02G122900/Gohir.A06G087701/Gohir.A07G145000/Gohir.A08G169100/Gohir.A10G111200/Gohir.A12G096100/Gohir.D02G058100/Gohir.D07G180900/Gohir.D11G207000
ko04913	Ovarian steroidogenesis	1	1868	17	23929	0.753526892555738	0.748983735920553	0.999430327425721	Gohir.A02G114800
ko03050	Proteasome	10	1868	152	23929	0.842760340358391	0.757028141820594	0.999430327425721	Gohir.A01G114600/Gohir.A01G160500/Gohir.A02G072200/Gohir.A03G062400/Gohir.A06G143600/Gohir.A06G194800/Gohir.D04G190800/Gohir.D05G204300/Gohir.D05G387450/Gohir.D08G246000
ko05211	Renal cell carcinoma	4	1868	65	23929	0.788305056827541	0.757050140077354	0.999430327425721	Gohir.A02G083300/Gohir.A12G037300/Gohir.D06G134800/Gohir.D07G009500
ko04112	Cell cycle - Caulobacter	3	1868	50	23929	0.768597430406852	0.759488865159928	0.999430327425721	Gohir.1Z050580/Gohir.D08G181200/Gohir.D09G093050
ko04928	Parathyroid hormone synthesis, secretion and action	3	1868	50	23929	0.768597430406852	0.759488865159928	0.999430327425721	Gohir.A10G167300/Gohir.A11G084300/Gohir.D07G009500
ko00730	Thiamine metabolism	4	1868	66	23929	0.776361040815002	0.767565905324151	0.999430327425721	Gohir.A08G090186/Gohir.D08G103801/Gohir.D10G165100/Gohir.D11G254700
ko00100	Steroid biosynthesis	5	1868	81	23929	0.790738097126391	0.767589813705091	0.999430327425721	Gohir.A05G255600/Gohir.D06G080100/Gohir.D11G159350/Gohir.D12G107000/Gohir.D12G107100
ko00670	One carbon pool by folate	3	1868	51	23929	0.753526892555737	0.771274718326862	0.999430327425721	Gohir.A06G087701/Gohir.A08G169100/Gohir.D10G187500
ko01522	Endocrine resistance	1422	1868	18380	23929	0.991064151286311	0.777090603849369	0.999430327425721	Gohir.1Z049321/Gohir.1Z049366/Gohir.1Z049380/Gohir.1Z049449/Gohir.1Z049480/Gohir.1Z049581/Gohir.1Z049594/Gohir.1Z049799/Gohir.1Z049834/Gohir.1Z049866/Gohir.1Z049880/Gohir.1Z049902/Gohir.1Z049931/Gohir.1Z049934/Gohir.1Z049966/Gohir.1Z050034/Gohir.1Z050080/Gohir.1Z050134/Gohir.1Z050166/Gohir.1Z050180/Gohir.1Z050234/Gohir.1Z050366/Gohir.1Z050380/Gohir.1Z050480/Gohir.1Z050566/Gohir.1Z050580/Gohir.1Z0…
ko04979	Cholesterol metabolism	2	1868	36	23929	0.711664287413752	0.783207922816997	0.999430327425721	Gohir.A12G076500/Gohir.D11G159350
ko00906	Carotenoid biosynthesis	5	1868	83	23929	0.771684167075153	0.785783619085994	0.999430327425721	Gohir.A01G135800/Gohir.A05G202500/Gohir.A06G137900/Gohir.A08G148900/Gohir.A13G152200
ko00902	Monoterpenoid biosynthesis	1	1868	19	23929	0.674208272286713	0.786671282171022	0.999430327425721	Gohir.A07G143000
ko04668	TNF signaling pathway	1	1868	19	23929	0.674208272286713	0.786671282171022	0.999430327425721	Gohir.D07G009500
ko04917	Prolactin signaling pathway	1	1868	19	23929	0.674208272286713	0.786671282171022	0.999430327425721	Gohir.D07G009500
ko04361	Axon regeneration	10	1868	157	23929	0.815920839073092	0.790929350103161	0.999430327425721	Gohir.A02G083300/Gohir.A06G140700/Gohir.A07G168500/Gohir.A10G164500/Gohir.A11G224200/Gohir.A12G037300/Gohir.A13G078200/Gohir.D05G305500/Gohir.D06G134800/Gohir.D11G238500
ko04933	AGE-RAGE signaling pathway in diabetic complications	3	1868	53	23929	0.725091915478162	0.793426016845621	0.999430327425721	Gohir.A02G083300/Gohir.A12G037300/Gohir.D06G134800
ko00280	Valine, leucine and isoleucine degradation	7	1868	114	23929	0.786576317667831	0.795582267161188	0.999430327425721	Gohir.A06G045700/Gohir.A08G064900/Gohir.A10G121400/Gohir.A10G148200/Gohir.D01G023550/Gohir.D02G079800/Gohir.D10G099600
ko04014	Ras signaling pathway	8	1868	129	23929	0.794415948740933	0.797724846737902	0.999430327425721	Gohir.A02G083300/Gohir.A10G167300/Gohir.A10G173200/Gohir.A11G084300/Gohir.A12G037300/Gohir.D06G060300/Gohir.D06G134800/Gohir.D07G009500
ko04624	Toll and Imd signaling pathway	3	1868	54	23929	0.711664287413752	0.803813573107562	0.999430327425721	Gohir.A01G147600/Gohir.A08G095400/Gohir.A09G116400
ko00514	Other types of O-glycan biosynthesis	2	1868	38	23929	0.674208272286713	0.808059297129534	0.999430327425721	Gohir.A06G142600/Gohir.A09G032200
ko00270	Cysteine and methionine metabolism	18	1868	274	23929	0.841530033292174	0.809105048544708	0.999430327425721	Gohir.A02G071300/Gohir.A07G170700/Gohir.A10G111200/Gohir.A10G148200/Gohir.A11G224810/Gohir.A11G308100/Gohir.A12G096100/Gohir.A12G240000/Gohir.A13G096100/Gohir.A13G097500/Gohir.A13G134101/Gohir.D02G081100/Gohir.D04G110400/Gohir.D07G177500/Gohir.D10G162166/Gohir.D11G314900/Gohir.D13G102200/Gohir.D13G176700
ko04727	GABAergic synapse	5	1868	86	23929	0.744764951944624	0.810972554979277	0.999430327425721	Gohir.A05G366500/Gohir.A12G056800/Gohir.D03G074600/Gohir.D05G294800/Gohir.D06G131800
ko00905	Brassinosteroid biosynthesis	3	1868	55	23929	0.698724936733502	0.813758016216356	0.999430327425721	Gohir.A06G057900/Gohir.D07G084700/Gohir.D11G140901
ko00643	Styrene degradation	1	1868	21	23929	0.609997960640359	0.818702995861901	0.999430327425721	Gohir.A11G264000
ko04961	Endocrine and other factor-regulated calcium reabsorption	4	1868	72	23929	0.711664287413752	0.823307688587364	0.999430327425721	Gohir.A05G302500/Gohir.A06G133200/Gohir.A10G135900/Gohir.D04G065100
ko04261	Adrenergic signaling in cardiomyocytes	9	1868	148	23929	0.778983882169107	0.825152206248774	0.999430327425721	Gohir.A01G142300/Gohir.A02G089400/Gohir.A08G094486/Gohir.A10G161800/Gohir.A10G173200/Gohir.A11G028180/Gohir.A13G053582/Gohir.D05G214200/Gohir.D05G322500
ko00590	Arachidonic acid metabolism	2	1868	40	23929	0.640497858672377	0.830338213429348	0.999430327425721	Gohir.A03G092600/Gohir.A10G144700
ko04137	Mitophagy - animal	9	1868	149	23929	0.773755802423006	0.830951071164578	0.999430327425721	Gohir.A01G131900/Gohir.A03G193900/Gohir.A06G054000/Gohir.A08G140000/Gohir.A09G101100/Gohir.A12G092466/Gohir.D03G106700/Gohir.D11G207100/Gohir.D12G214800
ko00562	Inositol phosphate metabolism	12	1868	193	23929	0.796474021146997	0.831357317545637	0.999430327425721	Gohir.A01G129200/Gohir.A02G112716/Gohir.A06G079700/Gohir.A08G000400/Gohir.A12G090600/Gohir.A13G083200/Gohir.D01G118800/Gohir.D03G067500/Gohir.D04G108600/Gohir.D10G099600/Gohir.D11G039900/Gohir.D12G084000
ko05133	Pertussis	4	1868	73	23929	0.701915461558769	0.831432415778148	0.999430327425721	Gohir.A01G166900/Gohir.A01G220300/Gohir.A07G148500/Gohir.A10G173200
ko04930	Type II diabetes mellitus	3	1868	57	23929	0.674208272286713	0.832366720051365	0.999430327425721	Gohir.A08G083100/Gohir.A08G096300/Gohir.A08G097100
ko04151	PI3K-Akt signaling pathway	18	1868	281	23929	0.820566651679913	0.839680736703295	0.999430327425721	Gohir.A01G132500/Gohir.A01G142300/Gohir.A02G083300/Gohir.A07G173300/Gohir.A08G094486/Gohir.A10G147600/Gohir.A10G161800/Gohir.A11G028180/Gohir.A12G037300/Gohir.A13G053582/Gohir.D02G084700/Gohir.D02G132200/Gohir.D05G291500/Gohir.D05G322500/Gohir.D06G134800/Gohir.D07G009500/Gohir.D07G180100/Gohir.D12G082700
ko00520	Amino sugar and nucleotide sugar metabolism	21	1868	324	23929	0.830275001982711	0.841461843720619	0.999430327425721	Gohir.A05G001766/Gohir.A05G192300/Gohir.A05G345866/Gohir.A06G107500/Gohir.A07G092700/Gohir.A07G161700/Gohir.A10G127600/Gohir.A11G227100/Gohir.A13G084200/Gohir.D01G142900/Gohir.D01G164000/Gohir.D03G155500/Gohir.D04G086700/Gohir.D06G050800/Gohir.D06G109800/Gohir.D08G070800/Gohir.D08G108700/Gohir.D08G149800/Gohir.D10G124400/Gohir.D12G047200/Gohir.D12G052200
ko05169	Epstein-Barr virus infection	13	1868	210	23929	0.792997348832467	0.843345831786722	0.999430327425721	Gohir.A02G083300/Gohir.A03G062400/Gohir.A03G144200/Gohir.A05G174800/Gohir.A06G194800/Gohir.A10G195000/Gohir.A12G037300/Gohir.A13G074800/Gohir.D04G190800/Gohir.D05G204300/Gohir.D06G134800/Gohir.D08G246000/Gohir.D09G093800
ko04140	Autophagy - animal	15	1868	239	23929	0.803972207538548	0.843673507085742	0.999430327425721	Gohir.A03G060300/Gohir.A03G193900/Gohir.A07G148000/Gohir.A08G137866/Gohir.A09G244600/Gohir.A10G147600/Gohir.A11G028180/Gohir.A12G092466/Gohir.A13G090400/Gohir.A13G099000/Gohir.D05G291500/Gohir.D05G322500/Gohir.D05G338601/Gohir.D07G009500/Gohir.D12G044100
ko04012	ErbB signaling pathway	1	1868	23	23929	0.55695465971511	0.845927271374672	0.999430327425721	Gohir.D07G009500
ko04726	Serotonergic synapse	1	1868	23	23929	0.55695465971511	0.845927271374672	0.999430327425721	Gohir.D07G009500
ko04912	GnRH signaling pathway	4	1868	75	23929	0.683197715917202	0.846748118010538	0.999430327425721	Gohir.A10G167300/Gohir.A10G173200/Gohir.A11G084300/Gohir.D07G009500
ko00052	Galactose metabolism	8	1868	137	23929	0.74802669625971	0.847420275266925	0.999430327425721	Gohir.A02G115000/Gohir.A04G068800/Gohir.A08G088562/Gohir.A09G020000/Gohir.D01G142900/Gohir.D03G107700/Gohir.D09G019600/Gohir.D09G190000
ko05162	Measles	5	1868	91	23929	0.703843800738876	0.847634561410265	0.999430327425721	Gohir.A08G072900/Gohir.A08G140000/Gohir.D05G327500/Gohir.D11G207100/Gohir.D12G214800
ko00790	Folate biosynthesis	3	1868	59	23929	0.651353754582078	0.849352904575378	0.999430327425721	Gohir.A06G094900/Gohir.A10G144700/Gohir.D03G130200
ko04113	Meiosis - yeast	12	1868	197	23929	0.780301959803911	0.850680582524889	0.999430327425721	Gohir.A01G134350/Gohir.A01G142300/Gohir.A02G089400/Gohir.A08G094486/Gohir.A10G118780/Gohir.A11G028180/Gohir.A13G000300/Gohir.A13G053582/Gohir.A13G074000/Gohir.D02G240100/Gohir.D05G322500/Gohir.D11G114800
ko00945	Stilbenoid, diarylheptanoid and gingerol biosynthesis	3	1868	60	23929	0.640497858672377	0.857269729318372	0.999430327425721	Gohir.A10G178100/Gohir.D06G201000/Gohir.D10G181500
ko04935	Growth hormone synthesis, secretion and action	1	1868	24	23929	0.533748215560314	0.85796641874655	0.999430327425721	Gohir.D07G009500
ko04022	cGMP-PKG signaling pathway	8	1868	139	23929	0.737263722212808	0.8581937300677	0.999430327425721	Gohir.A02G089400/Gohir.A03G071250/Gohir.A04G059852/Gohir.A10G173200/Gohir.A12G076500/Gohir.D03G097800/Gohir.D05G214200/Gohir.D07G009500
ko04340	Hedgehog signaling pathway	3	1868	61	23929	0.629997893776108	0.864819638014466	0.999430327425721	Gohir.A06G065100/Gohir.A11G120200/Gohir.D10G155700
ko00073	Cutin, suberine and wax biosynthesis	4	1868	78	23929	0.656920880689617	0.867505698722552	0.999430327425721	Gohir.A05G336400/Gohir.D02G156600/Gohir.D06G164016/Gohir.D09G094500
ko04940	Type I diabetes mellitus	1	1868	25	23929	0.512398286937902	0.869065298888003	0.999430327425721	Gohir.D13G099600
ko03430	Mismatch repair	4	1868	79	23929	0.648605426503673	0.873866301548342	0.999430327425721	Gohir.A01G051100/Gohir.A03G139700/Gohir.A09G046500/Gohir.D04G090500
ko04915	Estrogen signaling pathway	5	1868	96	23929	0.667185269450392	0.878201510138956	0.999430327425721	Gohir.A09G208100/Gohir.A10G173200/Gohir.D02G132200/Gohir.D07G009500/Gohir.D10G135800
ko04611	Platelet activation	1	1868	26	23929	0.492690660517213	0.879297311173697	0.999430327425721	Gohir.A02G089400
ko04016	MAPK signaling pathway - plant	28	1868	436	23929	0.822657800129659	0.882774937297096	0.999430327425721	Gohir.A01G151472/Gohir.A02G038301/Gohir.A02G108503/Gohir.A03G079800/Gohir.A03G088300/Gohir.A05G272100/Gohir.A05G304632/Gohir.A06G083500/Gohir.A06G108800/Gohir.A08G109900/Gohir.A08G123300/Gohir.A08G189900/Gohir.A09G135600/Gohir.A10G112300/Gohir.A10G173200/Gohir.A11G205000/Gohir.A11G251800/Gohir.A12G195200/Gohir.D01G164000/Gohir.D02G108500/Gohir.D03G070700/Gohir.D03G171500/Gohir.D05G289200/Gohir.D0…
ko04978	Mineral absorption	2	1868	46	23929	0.55695465971511	0.883829171582355	0.999430327425721	Gohir.A04G095070/Gohir.A05G304500
ko03015	mRNA surveillance pathway	22	1868	351	23929	0.802903298620643	0.884177533552123	0.999430327425721	Gohir.A01G122600/Gohir.A01G142300/Gohir.A02G082700/Gohir.A02G089400/Gohir.A04G066200/Gohir.A06G112400/Gohir.A07G167400/Gohir.A08G094486/Gohir.A09G176100/Gohir.A10G161800/Gohir.A10G183800/Gohir.A11G028180/Gohir.A13G042600/Gohir.A13G053582/Gohir.D01G014400/Gohir.D02G047500/Gohir.D05G290700/Gohir.D05G322500/Gohir.D06G197400/Gohir.D07G196300/Gohir.D12G138000/Gohir.D13G222500
ko04130	SNARE interactions in vesicular transport	7	1868	130	23929	0.689766924724098	0.88940642925596	0.999430327425721	Gohir.A07G146500/Gohir.A08G154700/Gohir.A09G199800/Gohir.D01G122400/Gohir.D07G152600/Gohir.D10G058400/Gohir.D11G218000
ko04621	NOD-like receptor signaling pathway	10	1868	178	23929	0.719660515362221	0.896009970007766	0.999430327425721	Gohir.A01G132500/Gohir.A04G071800/Gohir.A07G173300/Gohir.A09G244600/Gohir.A11G225202/Gohir.A12G076500/Gohir.D02G084700/Gohir.D02G209200/Gohir.D07G180100/Gohir.D08G109200
ko00521	Streptomycin biosynthesis	1	1868	28	23929	0.457498470480269	0.897426141842272	0.999430327425721	Gohir.D01G142900
ko04923	Regulation of lipolysis in adipocytes	1	1868	28	23929	0.457498470480269	0.897426141842272	0.999430327425721	Gohir.A08G076200
ko05410	Hypertrophic cardiomyopathy (HCM)	2	1868	48	23929	0.533748215560314	0.897867552274135	0.999430327425721	Gohir.D05G214200/Gohir.D11G177400
ko05204	Chemical carcinogenesis	7	1868	132	23929	0.679315910713127	0.898089290590071	0.999430327425721	Gohir.A02G114800/Gohir.A10G144700/Gohir.A11G225300/Gohir.D03G121433/Gohir.D04G136900/Gohir.D09G053100/Gohir.D11G120600
ko04138	Autophagy - yeast	13	1868	224	23929	0.743435014530437	0.898343759038151	0.999430327425721	Gohir.A02G108700/Gohir.A03G193900/Gohir.A07G148000/Gohir.A08G137866/Gohir.A09G244600/Gohir.A10G118780/Gohir.A10G147600/Gohir.A11G028180/Gohir.A12G092466/Gohir.A13G099000/Gohir.D03G134800/Gohir.D05G322500/Gohir.D06G131800
ko04144	Endocytosis	31	1868	486	23929	0.817096033697271	0.901025888075806	0.999430327425721	Gohir.A01G084800/Gohir.A02G108700/Gohir.A02G112716/Gohir.A03G097101/Gohir.A03G193900/Gohir.A04G048400/Gohir.A05G174800/Gohir.A05G248700/Gohir.A05G302500/Gohir.A06G133200/Gohir.A08G089300/Gohir.A08G102000/Gohir.A08G120900/Gohir.A10G110100/Gohir.A10G135900/Gohir.A10G167300/Gohir.A10G183400/Gohir.A11G030600/Gohir.A11G084300/Gohir.A12G092466/Gohir.A12G138000/Gohir.A13G090400/Gohir.D01G149100/Gohir.D0…
ko04350	TGF-beta signaling pathway	4	1868	84	23929	0.609997960640359	0.901847776746401	0.999430327425721	Gohir.A08G094486/Gohir.A11G028180/Gohir.A13G053582/Gohir.D05G322500
ko04010	MAPK signaling pathway	6	1868	117	23929	0.656920880689617	0.902125566064024	0.999430327425721	Gohir.A02G083300/Gohir.A04G059852/Gohir.A12G037300/Gohir.D06G134800/Gohir.D07G009500/Gohir.D07G179200
ko04916	Melanogenesis	2	1868	49	23929	0.522855394834593	0.904278260798874	0.999430327425721	Gohir.A10G173200/Gohir.D07G009500
ko00140	Steroid hormone biosynthesis	1	1868	29	23929	0.441722661153363	0.905442876164628	0.999430327425721	Gohir.A02G114800
ko04745	Phototransduction - fly	1	1868	29	23929	0.441722661153363	0.905442876164628	0.999430327425721	Gohir.A10G173200
ko04971	Gastric acid secretion	1	1868	29	23929	0.441722661153363	0.905442876164628	0.999430327425721	Gohir.A10G173200
ko00980	Metabolism of xenobiotics by cytochrome P450	7	1868	134	23929	0.669176867269648	0.906186662147074	0.999430327425721	Gohir.A02G114800/Gohir.A10G144700/Gohir.A11G225300/Gohir.D03G121433/Gohir.D04G136900/Gohir.D09G053100/Gohir.D11G120600
ko00563	Glycosylphosphatidylinositol (GPI)-anchor biosynthesis	2	1868	50	23929	0.512398286937902	0.910311152283829	0.999430327425721	Gohir.A09G031300/Gohir.D07G225200
ko04750	Inflammatory mediator regulation of TRP channels	2	1868	50	23929	0.512398286937902	0.910311152283829	0.999430327425721	Gohir.A02G089400/Gohir.A10G173200
ko00400	Phenylalanine, tyrosine and tryptophan biosynthesis	5	1868	103	23929	0.621842581235317	0.912107109352251	0.999430327425721	Gohir.A06G146500/Gohir.A09G093300/Gohir.D09G060500/Gohir.D09G111600/Gohir.D13G144200
ko04973	Carbohydrate digestion and absorption	1	1868	30	23929	0.426998572448251	0.912833366010841	0.999430327425721	Gohir.A05G202200
ko04920	Adipocytokine signaling pathway	4	1868	87	23929	0.588963548204484	0.915869755890743	0.999430327425721	Gohir.A11G213900/Gohir.D06G052200/Gohir.D09G054600/Gohir.D11G177400
ko00290	Valine, leucine and isoleucine biosynthesis	2	1868	51	23929	0.502351261703825	0.915986108771869	0.999430327425721	Gohir.D10G131900/Gohir.D10G144500
ko04970	Salivary secretion	1	1868	31	23929	0.413224424949921	0.919646507660773	0.999430327425721	Gohir.A10G173200
ko00220	Arginine biosynthesis	4	1868	88	23929	0.582270780611252	0.920129671135116	0.999430327425721	Gohir.A01G126900/Gohir.A12G212900/Gohir.D05G195800/Gohir.D13G122400
ko04976	Bile secretion	3	1868	71	23929	0.541265796061164	0.92290838522682	0.999430327425721	Gohir.A01G163100/Gohir.A12G120300/Gohir.D13G057851
ko05145	Toxoplasmosis	6	1868	123	23929	0.624875959680368	0.925136083907905	0.999430327425721	Gohir.A02G103800/Gohir.A10G196600/Gohir.A11G175200/Gohir.A13G137900/Gohir.D05G291500/Gohir.D13G142500
ko04740	Olfactory transduction	1	1868	32	23929	0.400311161670236	0.925927381528448	0.999430327425721	Gohir.A10G173200
ko04744	Phototransduction	1	1868	32	23929	0.400311161670236	0.925927381528448	0.999430327425721	Gohir.A10G173200
ko01521	EGFR tyrosine kinase inhibitor resistance	2	1868	53	23929	0.483394610318775	0.926337749594874	0.999430327425721	Gohir.D07G009500/Gohir.D12G082700
ko04212	Longevity regulating pathway - worm	14	1868	249	23929	0.720238555936809	0.926471840672015	0.999430327425721	Gohir.1Z050580/Gohir.A01G145818/Gohir.A10G171100/Gohir.A10G178700/Gohir.A11G225300/Gohir.A13G099000/Gohir.D03G121433/Gohir.D04G136900/Gohir.D09G053100/Gohir.D09G093050/Gohir.D09G094500/Gohir.D11G120600/Gohir.D12G018000/Gohir.D13G099600
ko04910	Insulin signaling pathway	13	1868	234	23929	0.711664287413752	0.927031013282542	0.999430327425721	Gohir.A01G128500/Gohir.A02G089400/Gohir.A02G112704/Gohir.A03G052500/Gohir.A09G009700/Gohir.A09G038200/Gohir.A10G147600/Gohir.A10G173200/Gohir.D05G291500/Gohir.D07G009500/Gohir.D09G131200/Gohir.D11G177400/Gohir.D12G082700
ko04211	Longevity regulating pathway	5	1868	107	23929	0.598596129600352	0.927504566293548	0.999430327425721	Gohir.A10G147600/Gohir.A10G178700/Gohir.A11G213900/Gohir.D06G052200/Gohir.D11G177400
ko04710	Circadian rhythm	4	1868	90	23929	0.569331429931002	0.928073432012049	0.999430327425721	Gohir.A06G065100/Gohir.A06G119300/Gohir.D10G155700/Gohir.D11G177400
ko04724	Glutamatergic synapse	4	1868	90	23929	0.569331429931002	0.928073432012049	0.999430327425721	Gohir.A04G059852/Gohir.A10G167300/Gohir.A11G084300/Gohir.A12G056800
ko04728	Dopaminergic synapse	8	1868	157	23929	0.652736671258473	0.929864319891826	0.999430327425721	Gohir.A01G142300/Gohir.A02G089400/Gohir.A08G094486/Gohir.A10G161800/Gohir.A10G173200/Gohir.A11G028180/Gohir.A13G053582/Gohir.D05G322500
ko03040	Spliceosome	27	1868	443	23929	0.780742310797028	0.929976136055473	0.999430327425721	Gohir.A01G145818/Gohir.A02G056900/Gohir.A03G070100/Gohir.A04G051600/Gohir.A04G054300/Gohir.A05G374200/Gohir.A06G103300/Gohir.A06G114800/Gohir.A06G125702/Gohir.A07G163600/Gohir.A09G029500/Gohir.A09G227600/Gohir.A10G109300/Gohir.A10G154800/Gohir.A11G146900/Gohir.A12G123300/Gohir.A13G027700/Gohir.A13G087800/Gohir.D01G014400/Gohir.D01G134000/Gohir.D03G048900/Gohir.D06G123100/Gohir.D07G176600/Gohir.D0…
ko04152	AMPK signaling pathway	16	1868	281	23929	0.729392579271034	0.930541728380099	0.999430327425721	Gohir.A01G142300/Gohir.A02G112704/Gohir.A03G028500/Gohir.A08G094486/Gohir.A10G147600/Gohir.A10G161800/Gohir.A11G028180/Gohir.A11G213900/Gohir.A13G053582/Gohir.A13G090400/Gohir.D05G291500/Gohir.D05G322500/Gohir.D06G052200/Gohir.D07G169200/Gohir.D11G177400/Gohir.D13G057851
ko04658	Th1 and Th2 cell differentiation	1	1868	33	23929	0.388180520407501	0.931717549805004	0.999430327425721	Gohir.A04G059852
ko04974	Protein digestion and absorption	1	1868	33	23929	0.388180520407501	0.931717549805004	0.999430327425721	Gohir.A12G056800
ko05218	Melanoma	1	1868	33	23929	0.388180520407501	0.931717549805004	0.999430327425721	Gohir.D07G009500
ko04720	Long-term potentiation	4	1868	94	23929	0.545104560572236	0.941856132196743	0.999430327425721	Gohir.A02G089400/Gohir.A04G059852/Gohir.A10G173200/Gohir.D07G009500
ko05031	Amphetamine addiction	4	1868	94	23929	0.545104560572236	0.941856132196743	0.999430327425721	Gohir.A02G089400/Gohir.A04G059852/Gohir.A10G173200/Gohir.D09G093800
ko04925	Aldosterone synthesis and secretion	1	1868	36	23929	0.355832143706876	0.94651228474099	0.999430327425721	Gohir.A10G173200
ko01524	Platinum drug resistance	9	1868	180	23929	0.640497858672377	0.947183779151832	0.999430327425721	Gohir.A05G245600/Gohir.A09G046500/Gohir.A11G225300/Gohir.D03G121433/Gohir.D04G136900/Gohir.D05G291500/Gohir.D08G200000/Gohir.D09G053100/Gohir.D11G120600
ko03018	RNA degradation	15	1868	275	23929	0.698724936733502	0.948636739070765	0.999430327425721	Gohir.A01G122600/Gohir.A02G082700/Gohir.A04G054700/Gohir.A06G074300/Gohir.A06G112400/Gohir.A07G081100/Gohir.A11G087100/Gohir.A13G042600/Gohir.A13G105600/Gohir.D01G062100/Gohir.D03G100000/Gohir.D12G018000/Gohir.D13G099600/Gohir.D13G109400/Gohir.D13G187700
ko04341	Hedgehog signaling pathway - fly	3	1868	78	23929	0.492690660517213	0.948849794163785	0.999430327425721	Gohir.A06G065100/Gohir.A11G120200/Gohir.D10G155700
ko03008	Ribosome biogenesis in eukaryotes	9	1868	181	23929	0.636959196469767	0.949304509450068	0.999430327425721	Gohir.A02G089200/Gohir.A02G105700/Gohir.A02G139900/Gohir.A08G140000/Gohir.A09G100300/Gohir.A12G092500/Gohir.A13G156800/Gohir.D11G207100/Gohir.D12G214800
ko04924	Renin secretion	2	1868	60	23929	0.426998572448251	0.953844633212833	0.999430327425721	Gohir.A04G059852/Gohir.A10G173200
ko04713	Circadian entrainment	1	1868	38	23929	0.337104136143356	0.954549049113849	0.999430327425721	Gohir.A10G173200
ko00983	Drug metabolism - other enzymes	9	1868	184	23929	0.626573992179499	0.955221699492065	0.999430327425721	Gohir.A07G228500/Gohir.A09G035100/Gohir.A11G225300/Gohir.A13G095700/Gohir.D03G121433/Gohir.D04G136900/Gohir.D09G053100/Gohir.D11G120600/Gohir.D13G089700
ko00720	Carbon fixation pathways in prokaryotes	3	1868	81	23929	0.474442858275835	0.957255505730965	0.999430327425721	Gohir.1Z049999/Gohir.A07G163654/Gohir.D01G102333
ko04066	HIF-1 signaling pathway	8	1868	170	23929	0.60282151404459	0.959687720547334	0.999430327425721	Gohir.A03G028500/Gohir.A04G065600/Gohir.A04G065642/Gohir.A13G030500/Gohir.D03G100000/Gohir.D04G103800/Gohir.D07G009500/Gohir.D12G082700
ko04625	C-type lectin receptor signaling pathway	2	1868	62	23929	0.413224424949921	0.959690659230916	0.999430327425721	Gohir.A04G059852/Gohir.A10G173200
ko05418	Fluid shear stress and atherosclerosis	15	1868	283	23929	0.678972995059057	0.961018696285752	0.999430327425721	Gohir.A02G083300/Gohir.A04G071800/Gohir.A05G322508/Gohir.A10G173200/Gohir.A11G225300/Gohir.A12G037300/Gohir.D02G132200/Gohir.D02G209200/Gohir.D03G121433/Gohir.D04G136900/Gohir.D05G324901/Gohir.D05G338601/Gohir.D06G134800/Gohir.D09G053100/Gohir.D11G120600
ko04612	Antigen processing and presentation	8	1868	171	23929	0.599296242032633	0.961423701466647	0.999430327425721	Gohir.A02G107105/Gohir.A05G110300/Gohir.A12G055300/Gohir.D03G067300/Gohir.D05G179300/Gohir.D05G338601/Gohir.D07G050300/Gohir.D13G136500
ko04218	Cellular senescence	13	1868	253	23929	0.658219143299676	0.962947895467991	0.999430327425721	Gohir.A02G089400/Gohir.A02G112600/Gohir.A03G071250/Gohir.A04G025700/Gohir.A04G059852/Gohir.A06G107700/Gohir.A06G190500/Gohir.A10G173200/Gohir.A12G035900/Gohir.A12G076500/Gohir.A12G141300/Gohir.D03G097800/Gohir.D07G009500
ko05221	Acute myeloid leukemia	1	1868	41	23929	0.312437979840184	0.964398786699807	0.999430327425721	Gohir.D07G009500
ko05014	Amyotrophic lateral sclerosis (ALS)	4	1868	103	23929	0.497474064988254	0.964486436769432	0.999430327425721	Gohir.A02G083300/Gohir.A04G059852/Gohir.A12G037300/Gohir.D06G134800
ko00650	Butanoate metabolism	2	1868	64	23929	0.400311161670236	0.96482257224716	0.999430327425721	Gohir.D01G023550/Gohir.D02G058100
ko04114	Oocyte meiosis	13	1868	255	23929	0.653056640214972	0.965616746453981	0.999430327425721	Gohir.A01G132500/Gohir.A01G142300/Gohir.A02G089400/Gohir.A04G059852/Gohir.A07G173300/Gohir.A08G094486/Gohir.A10G173200/Gohir.A11G028180/Gohir.A13G053582/Gohir.D02G084700/Gohir.D05G322500/Gohir.D07G009500/Gohir.D07G180100
ko04626	Plant-pathogen interaction	32	1868	545	23929	0.752144274404259	0.967038710317538	0.999430327425721	Gohir.A01G095000/Gohir.A02G103800/Gohir.A02G107200/Gohir.A03G032100/Gohir.A03G088300/Gohir.A03G089401/Gohir.A03G093300/Gohir.A05G345824/Gohir.A06G135100/Gohir.A07G131200/Gohir.A08G123200/Gohir.A09G012000/Gohir.A09G119400/Gohir.A10G118600/Gohir.A10G173200/Gohir.A10G196600/Gohir.A11G175200/Gohir.A11G225202/Gohir.A12G115800/Gohir.A12G195200/Gohir.A12G268900/Gohir.A13G137900/Gohir.D02G108500/Gohir.D0…
ko04934	Cushing syndrome	1	1868	43	23929	0.29790598077785	0.969749099629564	0.999430327425721	Gohir.D07G009500
ko00020	Citrate cycle (TCA cycle)	6	1868	143	23929	0.537480720564232	0.971185830838494	0.999430327425721	Gohir.A10G111200/Gohir.A12G093625/Gohir.A12G096100/Gohir.D08G087700/Gohir.D12G095700/Gohir.D13G067700
ko00982	Drug metabolism - cytochrome P450	5	1868	126	23929	0.508331633866966	0.972461370847353	0.999430327425721	Gohir.A11G225300/Gohir.D03G121433/Gohir.D04G136900/Gohir.D09G053100/Gohir.D11G120600
ko00480	Glutathione metabolism	11	1868	229	23929	0.615325453746388	0.973070270831695	0.999430327425721	Gohir.A06G043400/Gohir.A06G098220/Gohir.A06G107600/Gohir.A07G228500/Gohir.A11G224810/Gohir.A11G225300/Gohir.D03G121433/Gohir.D04G136900/Gohir.D06G109900/Gohir.D09G053100/Gohir.D11G120600
ko04068	FoxO signaling pathway	7	1868	162	23929	0.553516667988474	0.973260749468258	0.999430327425721	Gohir.A06G065100/Gohir.A10G178700/Gohir.A10G195000/Gohir.D05G291500/Gohir.D07G009500/Gohir.D10G155700/Gohir.D11G177400
ko04150	mTOR signaling pathway	8	1868	181	23929	0.566185952417571	0.975415953465091	0.999430327425721	Gohir.A01G109000/Gohir.A02G087000/Gohir.A03G077200/Gohir.A10G147600/Gohir.A13G099000/Gohir.D05G291500/Gohir.D07G009500/Gohir.D12G082700
ko02026	Biofilm formation - Escherichia coli	1	1868	46	23929	0.278477329857555	0.976306075757403	0.999430327425721	Gohir.A05G192300
ko04657	IL-17 signaling pathway	1	1868	46	23929	0.278477329857555	0.976306075757403	0.999430327425721	Gohir.D02G132200
ko00830	Retinol metabolism	1	1868	47	23929	0.272552280286118	0.978159287267061	0.999430327425721	Gohir.A02G114800
ko04020	Calcium signaling pathway	6	1868	149	23929	0.515837201615337	0.978710845510181	0.999430327425721	Gohir.A03G071250/Gohir.A04G059852/Gohir.A10G173200/Gohir.A12G076500/Gohir.D03G097800/Gohir.D05G214200
ko05214	Glioma	2	1868	73	23929	0.350957730779385	0.981097435990834	0.999430327425721	Gohir.A10G173200/Gohir.D07G009500
ko04110	Cell cycle	13	1868	271	23929	0.614499790608184	0.981500162336054	0.999430327425721	Gohir.A01G132500/Gohir.A01G134350/Gohir.A07G173300/Gohir.A09G051100/Gohir.A12G035900/Gohir.A13G000300/Gohir.A13G074000/Gohir.D02G084700/Gohir.D02G240100/Gohir.D07G180100/Gohir.D09G093800/Gohir.D10G232900/Gohir.D11G114800
ko03420	Nucleotide excision repair	6	1868	152	23929	0.505656204215034	0.981746573118526	0.999430327425721	Gohir.A01G051100/Gohir.A03G139700/Gohir.A06G141900/Gohir.A09G051100/Gohir.A12G083500/Gohir.D04G090500
ko05167	Kaposi sarcoma-associated herpesvirus infection	9	1868	205	23929	0.562388363712331	0.982059246736118	0.999430327425721	Gohir.A01G131900/Gohir.A02G083300/Gohir.A04G059852/Gohir.A07G148000/Gohir.A08G137866/Gohir.A10G173200/Gohir.A12G037300/Gohir.D06G134800/Gohir.D07G009500
ko04111	Cell cycle - yeast	11	1868	239	23929	0.589579618861602	0.982245372465945	0.999430327425721	Gohir.A01G134350/Gohir.A08G094486/Gohir.A11G028180/Gohir.A13G000300/Gohir.A13G053582/Gohir.A13G074000/Gohir.D02G240100/Gohir.D05G322500/Gohir.D08G171900/Gohir.D10G232900/Gohir.D11G114800
ko04659	Th17 cell differentiation	1	1868	50	23929	0.256199143468951	0.982894058538728	0.999430327425721	Gohir.A04G059852
ko03022	Basal transcription factors	4	1868	116	23929	0.441722661153363	0.983101852372489	0.999430327425721	Gohir.A05G258000/Gohir.A09G051100/Gohir.A10G168600/Gohir.A12G083500
ko04070	Phosphatidylinositol signaling system	8	1868	190	23929	0.53936661782937	0.983857763375163	0.999430327425721	Gohir.A01G129200/Gohir.A02G112716/Gohir.A10G173200/Gohir.A12G090600/Gohir.D01G118800/Gohir.D03G067500/Gohir.D04G108600/Gohir.D12G084000
ko04214	Apoptosis - fly	1	1868	54	23929	0.237221429137917	0.987650986295672	0.999430327425721	Gohir.A12G035900
ko05203	Viral carcinogenesis	16	1868	332	23929	0.617347333660122	0.988508135881781	0.999430327425721	Gohir.A01G132500/Gohir.A02G083300/Gohir.A04G081700/Gohir.A07G173300/Gohir.A08G083100/Gohir.A08G096300/Gohir.A08G097100/Gohir.A10G195000/Gohir.A12G037300/Gohir.A13G097800/Gohir.D02G084700/Gohir.D06G134800/Gohir.D07G035100/Gohir.D07G180100/Gohir.D08G218500/Gohir.D09G093800
ko05034	Alcoholism	11	1868	251	23929	0.561392545449892	0.989440585049228	0.999430327425721	Gohir.A02G089400/Gohir.A04G081700/Gohir.A06G137000/Gohir.A10G173200/Gohir.A13G097800/Gohir.A13G134000/Gohir.D01G084600/Gohir.D01G208900/Gohir.D07G009500/Gohir.D08G041700/Gohir.D09G093800
ko04921	Oxytocin signaling pathway	5	1868	145	23929	0.441722661153363	0.990274039860164	0.999430327425721	Gohir.A02G089400/Gohir.A04G059852/Gohir.A10G173200/Gohir.D07G009500/Gohir.D11G177400
ko04213	Longevity regulating pathway - multiple species	4	1868	127	23929	0.40346321806134	0.99119924028285	0.999430327425721	Gohir.A10G147600/Gohir.A10G178700/Gohir.D09G093800/Gohir.D11G177400
ko05322	Systemic lupus erythematosus	6	1868	168	23929	0.457498470480269	0.99216968630236	0.999430327425721	Gohir.A04G081700/Gohir.A11G146900/Gohir.A13G097800/Gohir.A13G134000/Gohir.D01G208900/Gohir.D08G041700
ko00960	Tropane, piperidine and pyridine alkaloid biosynthesis	1	1868	60	23929	0.213499286224126	0.992426199041995	0.999430327425721	Gohir.A12G144700
ko04120	Ubiquitin mediated proteolysis	17	1868	366	23929	0.594998010788547	0.994245974673615	0.999430327425721	Gohir.A01G131900/Gohir.A05G174800/Gohir.A05G281100/Gohir.A06G103100/Gohir.A08G072900/Gohir.A08G095400/Gohir.A09G116400/Gohir.A09G227600/Gohir.A11G037700/Gohir.A11G186700/Gohir.A12G073200/Gohir.D01G125000/Gohir.D06G111300/Gohir.D08G107200/Gohir.D10G232900/Gohir.D11G193200/Gohir.D12G075500
ko05131	Shigellosis	17	1868	366	23929	0.594998010788547	0.994245974673615	0.999430327425721	Gohir.A01G131900/Gohir.A01G147600/Gohir.A02G083300/Gohir.A08G089300/Gohir.A08G095400/Gohir.A08G120900/Gohir.A09G116400/Gohir.A09G244600/Gohir.A10G147600/Gohir.A12G037300/Gohir.A13G134000/Gohir.D01G149100/Gohir.D03G057600/Gohir.D06G134800/Gohir.D08G041700/Gohir.D08G100500/Gohir.D13G116500
ko05225	Hepatocellular carcinoma	6	1868	177	23929	0.434235836388052	0.995219410001915	0.999430327425721	Gohir.A11G225300/Gohir.D03G121433/Gohir.D04G136900/Gohir.D07G009500/Gohir.D09G053100/Gohir.D11G120600
ko04371	Apelin signaling pathway	4	1868	139	23929	0.368631861106404	0.995770740871142	0.999430327425721	Gohir.A10G173200/Gohir.D07G009500/Gohir.D11G177400/Gohir.D12G082700
ko04914	Progesterone-mediated oocyte maturation	2	1868	95	23929	0.269683308914685	0.996040012026535	0.999430327425721	Gohir.D07G009500/Gohir.D10G232900
ko05168	Herpes simplex virus 1 infection	3	1868	119	23929	0.322940096809602	0.996190933060156	0.999430327425721	Gohir.A02G089400/Gohir.D01G134000/Gohir.D13G104600
ko00770	Pantothenate and CoA biosynthesis	1	1868	69	23929	0.18565155323837	0.996363094401275	0.999430327425721	Gohir.D10G144500
ko00053	Ascorbate and aldarate metabolism	3	1868	126	23929	0.304998980320179	0.997613584922413	0.999430327425721	Gohir.A06G045700/Gohir.A06G098220/Gohir.D02G079800
ko04922	Glucagon signaling pathway	8	1868	232	23929	0.441722661153363	0.998069021944979	0.999430327425721	Gohir.A02G112704/Gohir.A04G059852/Gohir.A08G083100/Gohir.A08G096300/Gohir.A08G097100/Gohir.A10G171100/Gohir.A10G173200/Gohir.D11G177400
ko05161	Hepatitis B	1	1868	78	23929	0.164230220172404	0.998254077571504	0.999430327425721	Gohir.D07G009500
ko04141	Protein processing in endoplasmic reticulum	28	1868	578	23929	0.620551558575313	0.998348511875795	0.999430327425721	Gohir.1Z049473/Gohir.A01G140607/Gohir.A02G096000/Gohir.A03G117900/Gohir.A03G209500/Gohir.A04G065342/Gohir.A04G072300/Gohir.A05G126100/Gohir.A05G334800/Gohir.A06G045200/Gohir.A06G141900/Gohir.A07G041300/Gohir.A08G095400/Gohir.A08G137366/Gohir.A09G116400/Gohir.A09G147700/Gohir.A12G027900/Gohir.A12G066200/Gohir.A13G109700/Gohir.A13G122233/Gohir.D02G101500/Gohir.D02G113300/Gohir.D02G132200/Gohir.D04G…
ko04217	Necroptosis	7	1868	217	23929	0.413224424949921	0.99847332837316	0.999430327425721	Gohir.A03G071250/Gohir.A04G095070/Gohir.A05G304500/Gohir.A12G076500/Gohir.A12G212900/Gohir.D01G208900/Gohir.D03G097800
ko02020	Two-component system	5	1868	181	23929	0.353866220260982	0.998833597676061	0.999430327425721	Gohir.A02G050900/Gohir.A02G107101/Gohir.A05G082800/Gohir.A06G116500/Gohir.D12G197966
ko04931	Insulin resistance	3	1868	147	23929	0.261427697417297	0.999430327425721	0.999430327425721	Gohir.A02G089400/Gohir.D05G291500/Gohir.D11G177400
